# Supplementary material for: Highly diastereoselective synthesis of polycyclic amines via redox neutral C–H functionalization
Source: Royal Society of Chemistry journal article supplement (doi:10.1039/c5nj01706h), 2015-01-01

## Supplementary material

### **Highly Diastereoselective Synthesis of Polycyclic Amines via-Redox Neutral C-H Functionalization**

#### **New Journal of Chemistry**

Chottanahalli. S. Pavan Kumar,<sup>a#</sup> Kachigere. B. Harsha,<sup>a#</sup> Nagarakere. C. Sandhaya,<sup>a</sup> Ajjalli. B. Ramesha,<sup>a</sup> Kempegowda Mantelingu,<sup>a\*</sup> and Kanchugarakoppal. S. Rangappa,<sup>a\*</sup>

*<sup>#</sup>DOS in Chemistry, University of Mysore, Manasagangotri, Mysuru-06, India*

#### **Contents.**

- |                                                                                                              |         |
|--------------------------------------------------------------------------------------------------------------|---------|
| 1. The <sup>1</sup> H and <sup>13</sup> C NMR Spectra of <b>3 (a-p)</b> and ORTEP of <b>3c</b> and <b>3p</b> | S02-S35 |
| 2. The <sup>1</sup> H and <sup>13</sup> C NMR Spectra of <b>4 (a-l)</b> and ORTEP of <b>4c</b>               | S36-S60 |

Date: 01-07-2015

<sup>1</sup>H NMR of **3a** in CDCl<sub>3</sub>

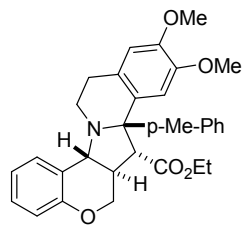

**3a**

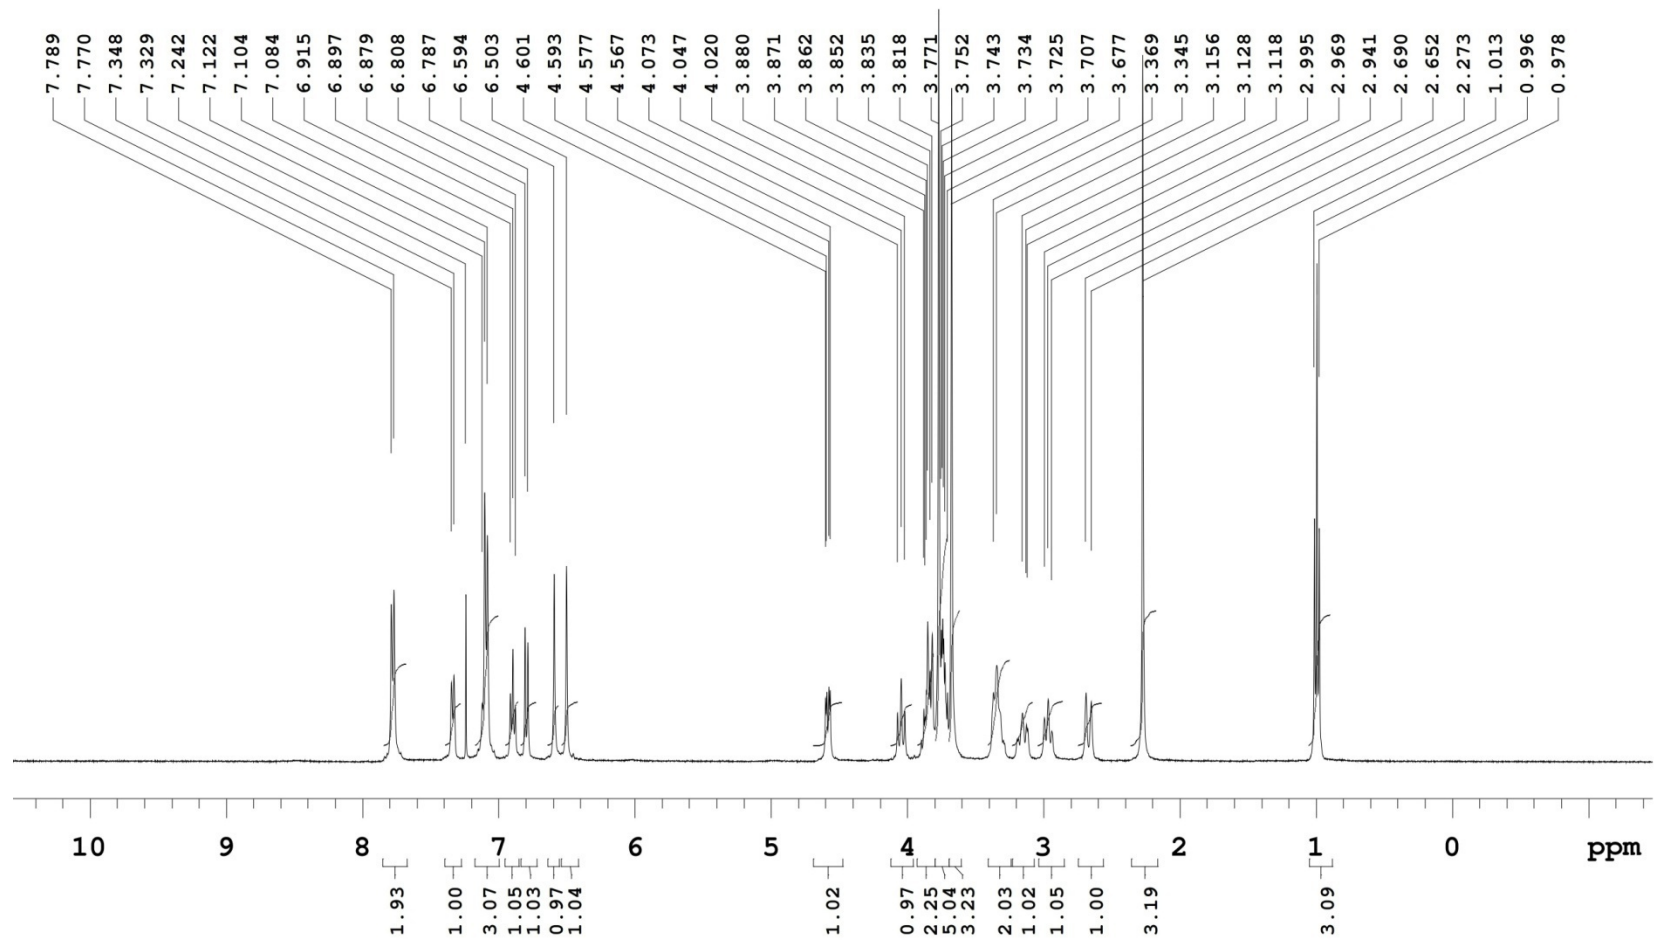

<sup>13</sup>C NMR of **3a** in CDCl<sub>3</sub>

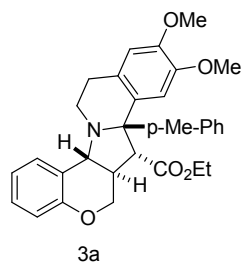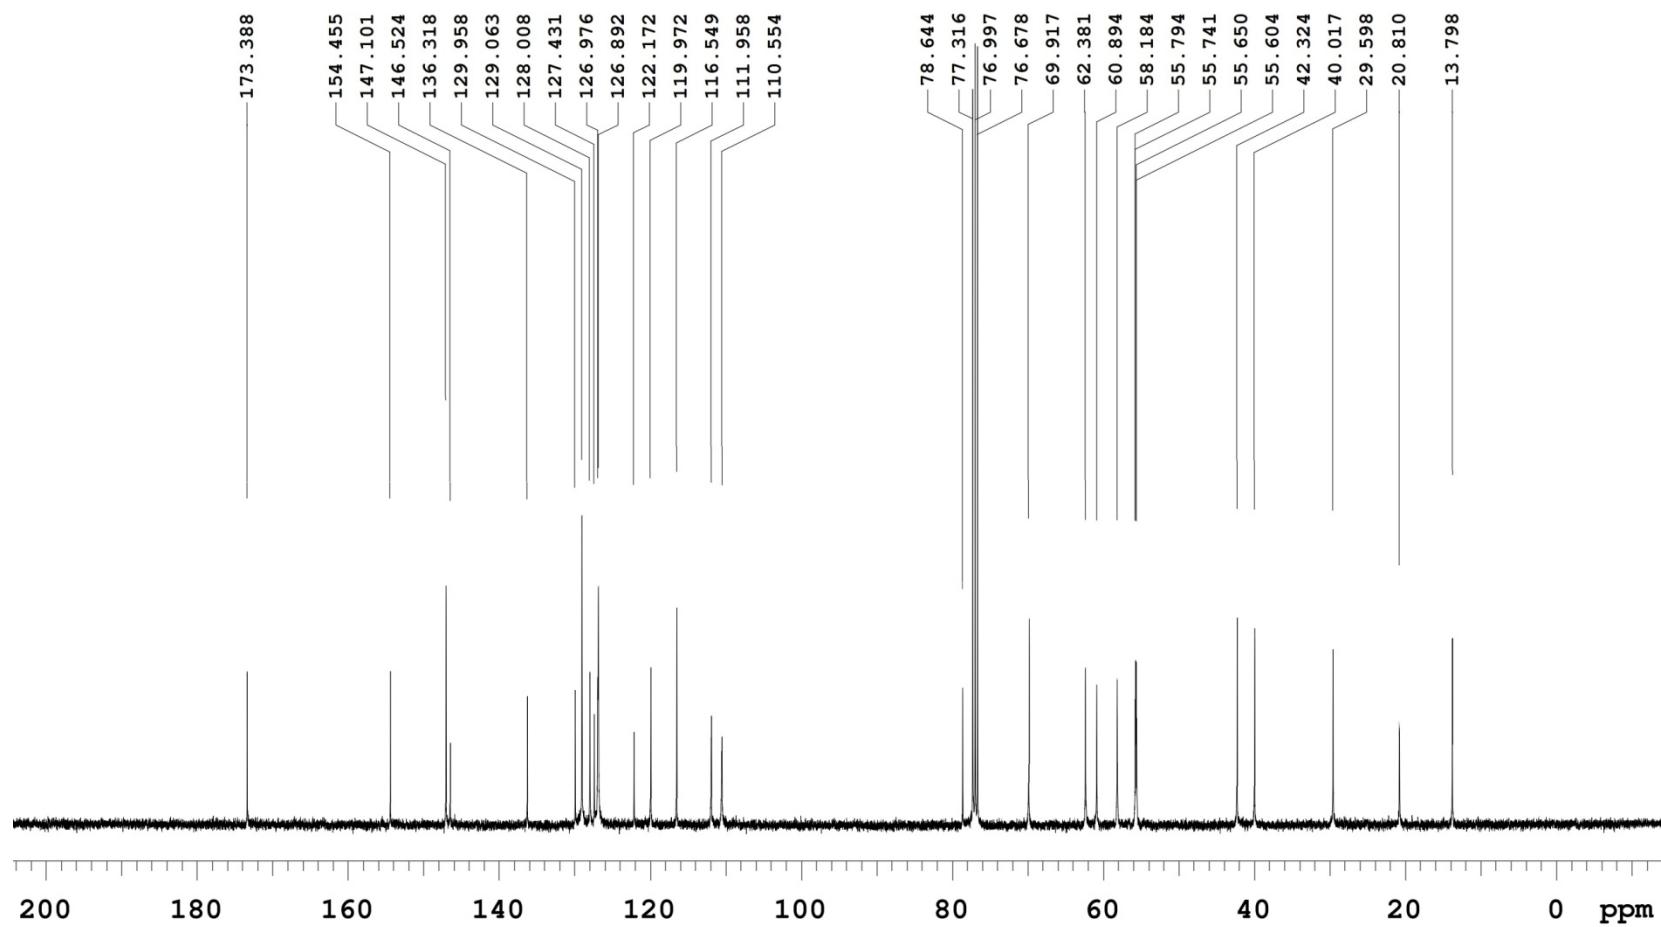

<sup>1</sup>H NMR of **3b** in CDCl<sub>3</sub>

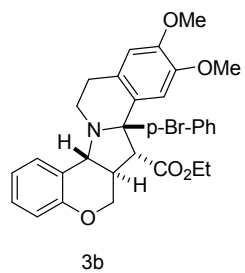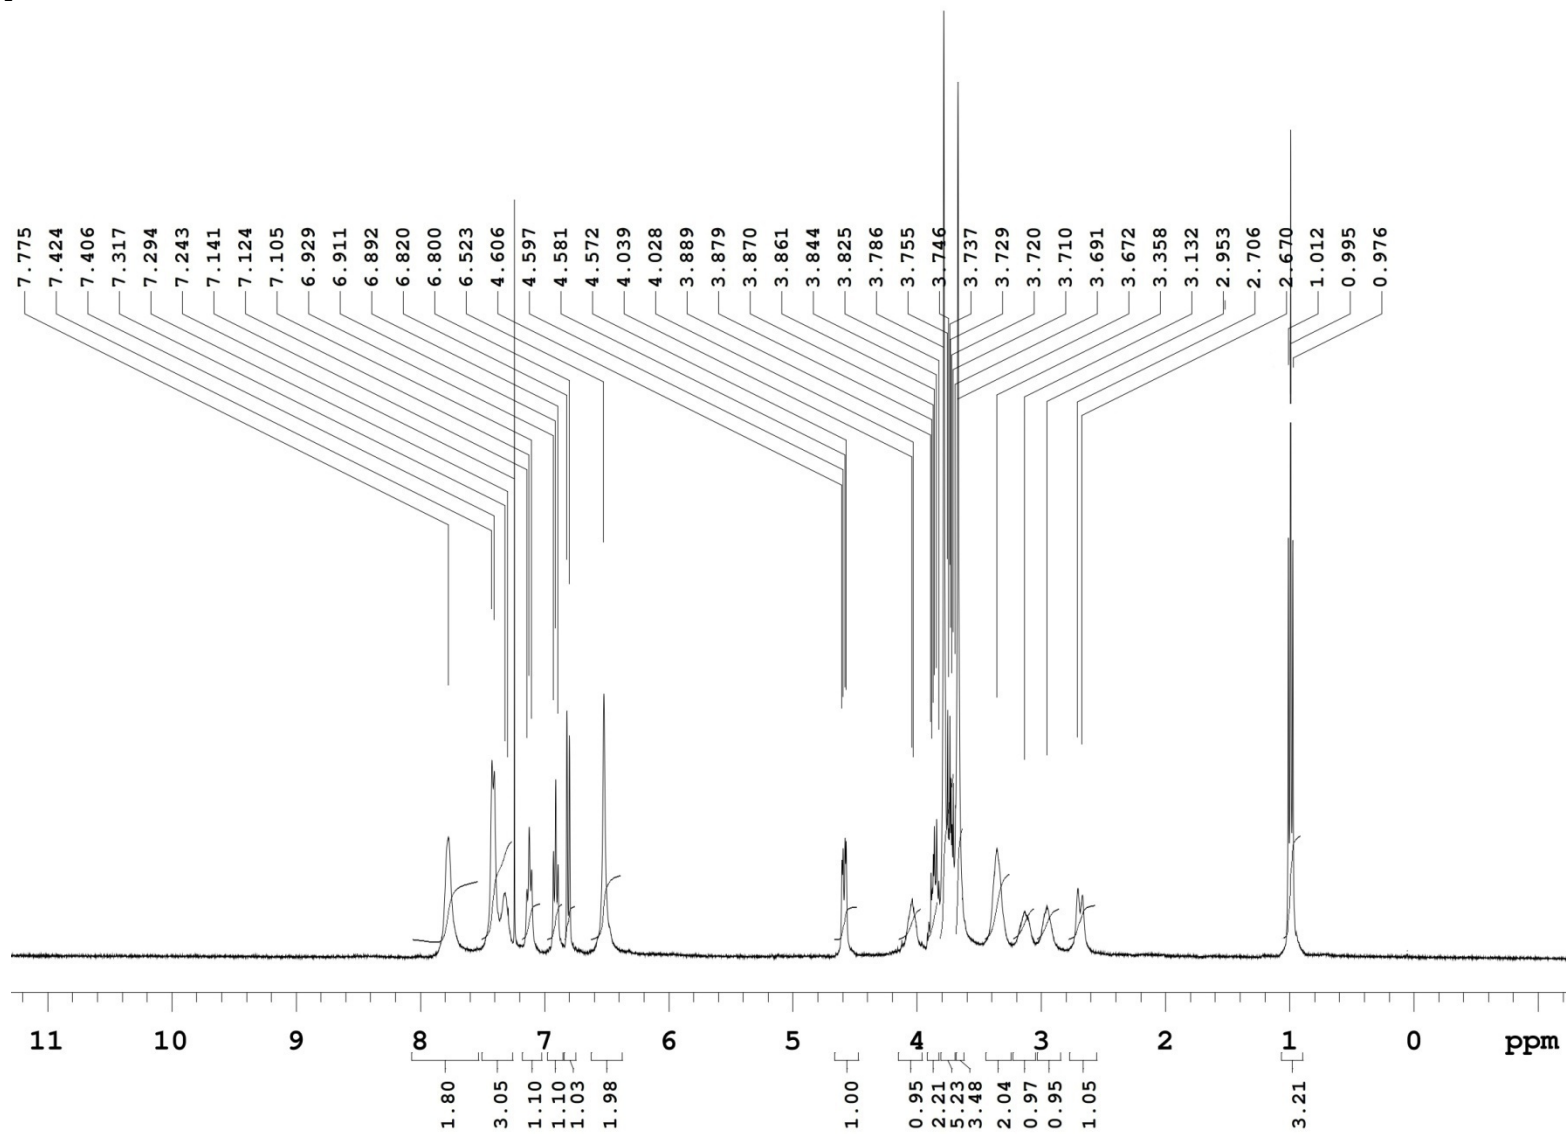

$^{13}\text{C}$  NMR of **3b** in  $\text{CDCl}_3$

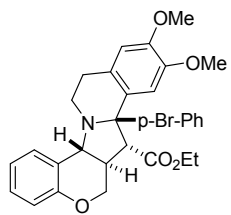

**3b**

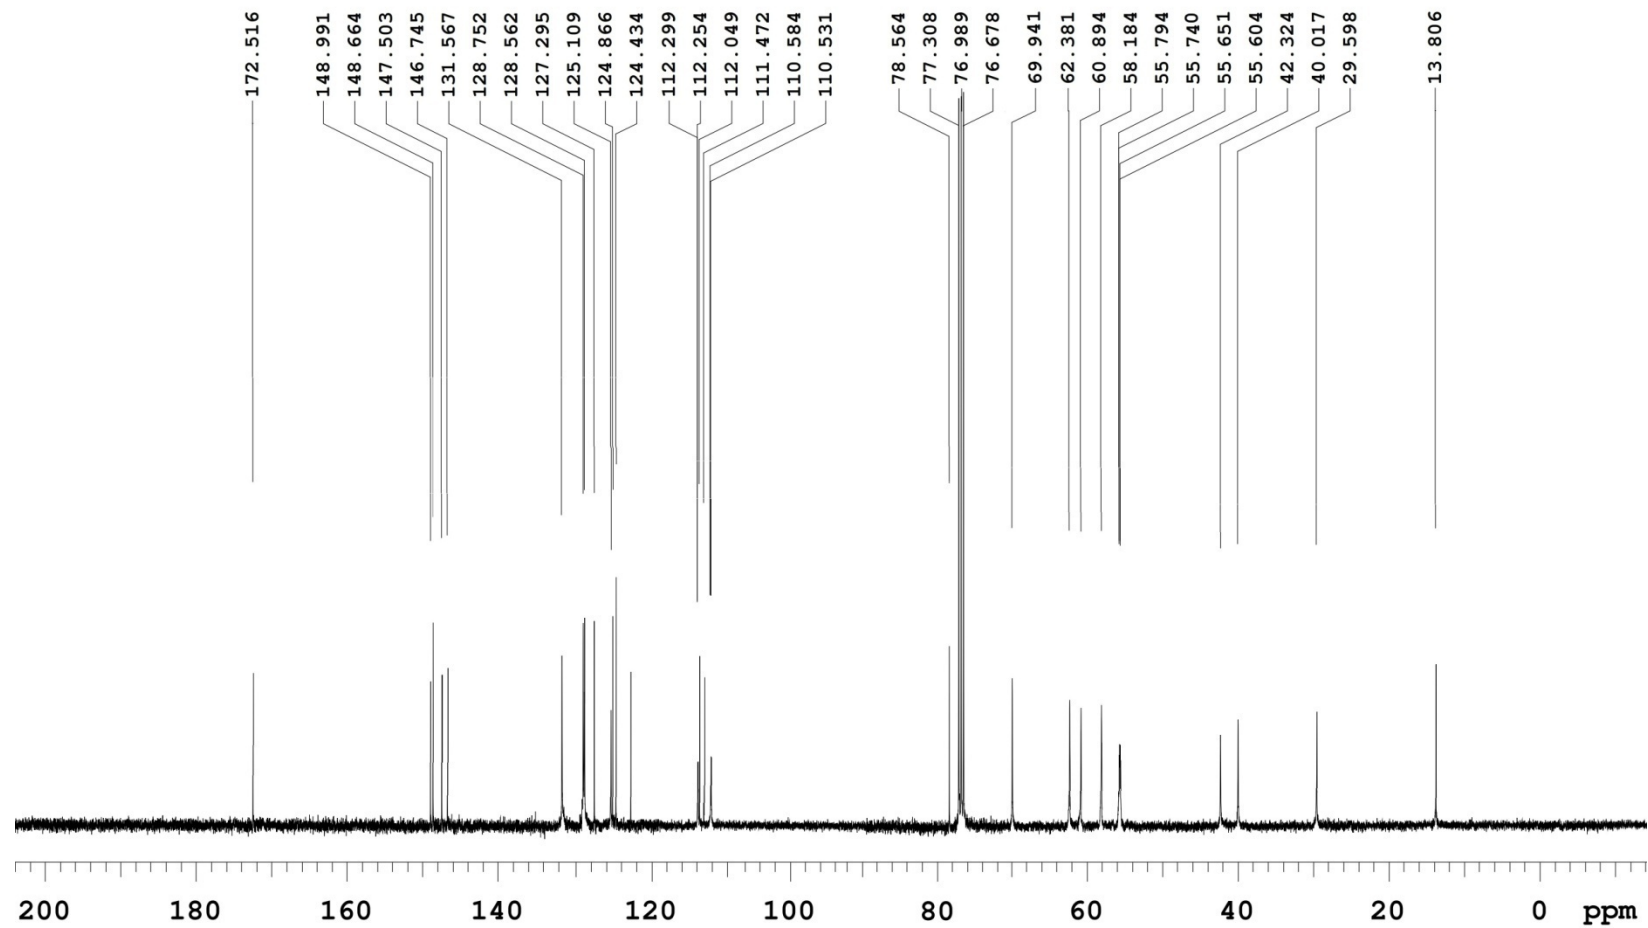

<sup>1</sup>H NMR of **3c** in CDCl<sub>3</sub>

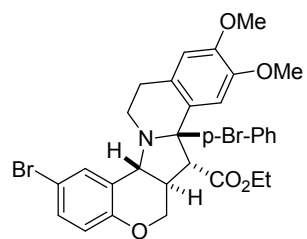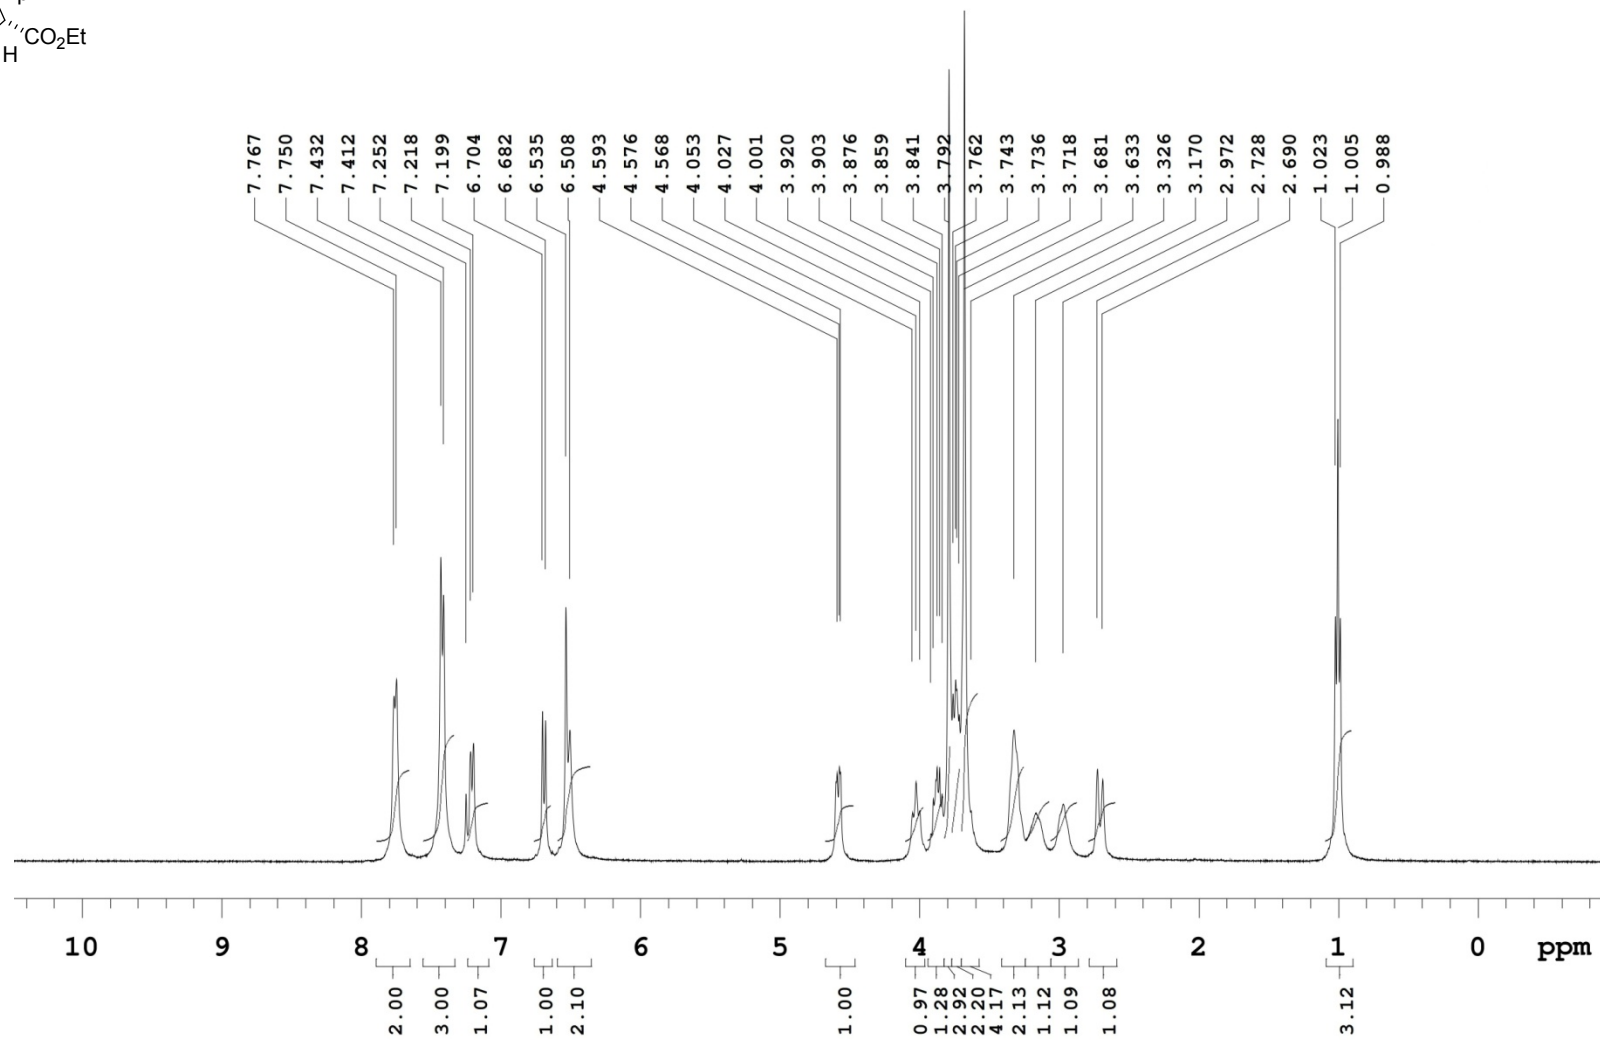

<sup>13</sup>C NMR of **3c** in CDCl<sub>3</sub>

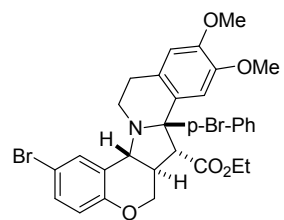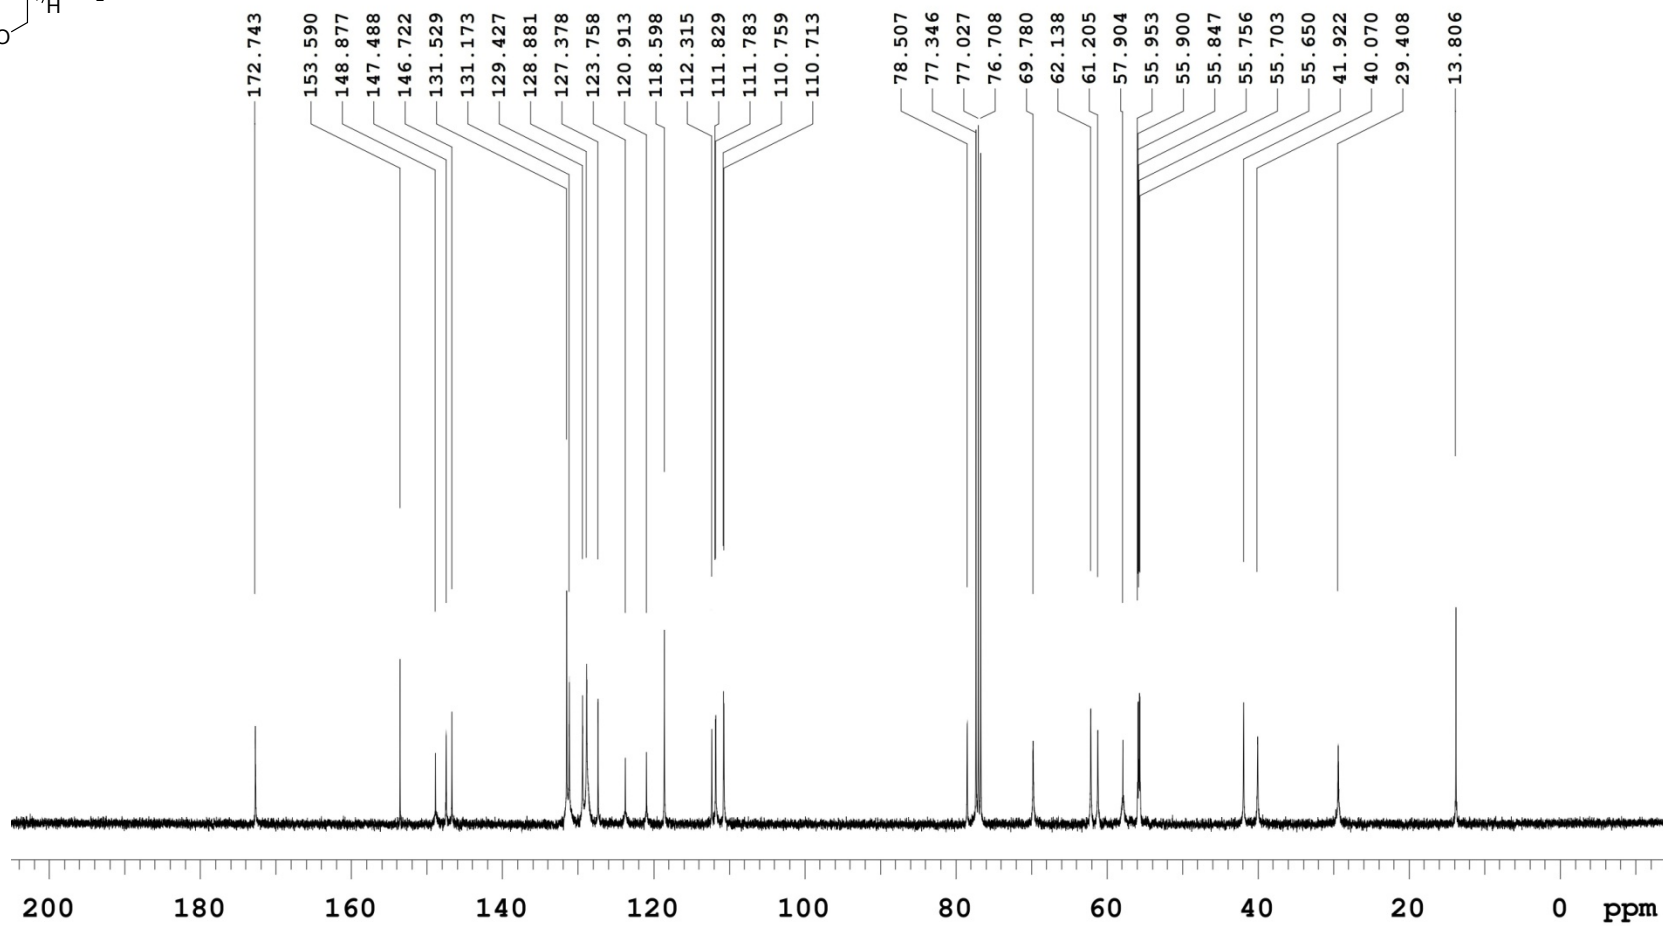

ORTEP diagram of **3c**

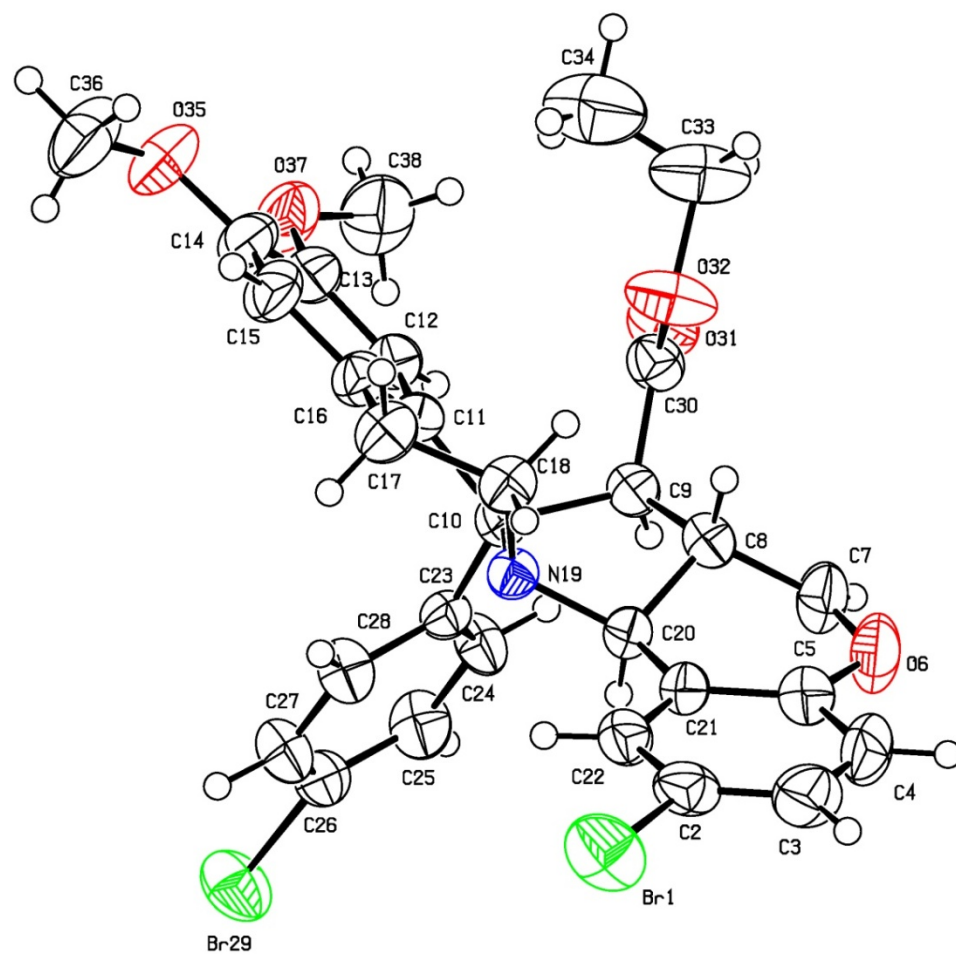



<sup>1</sup>H NMR of **3d** in CDCl<sub>3</sub>

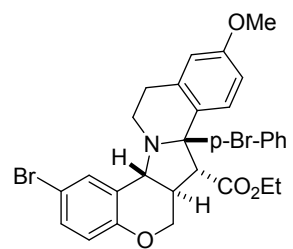

**3d**

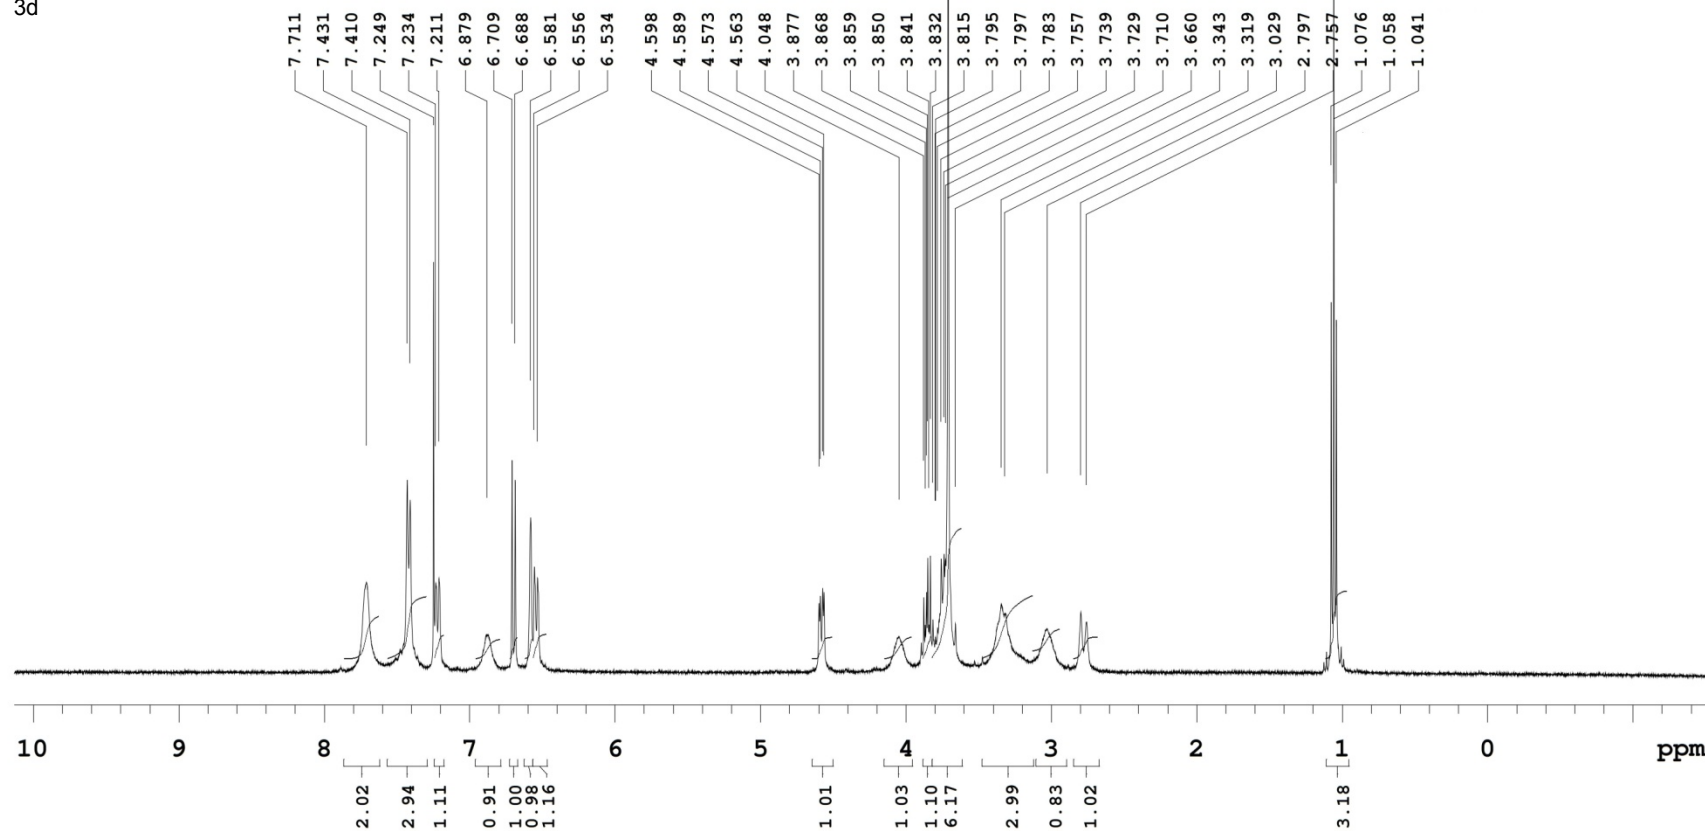

<sup>13</sup>C NMR of **3d** in CDCl<sub>3</sub>

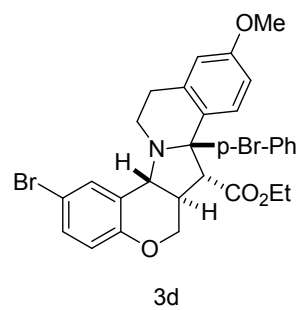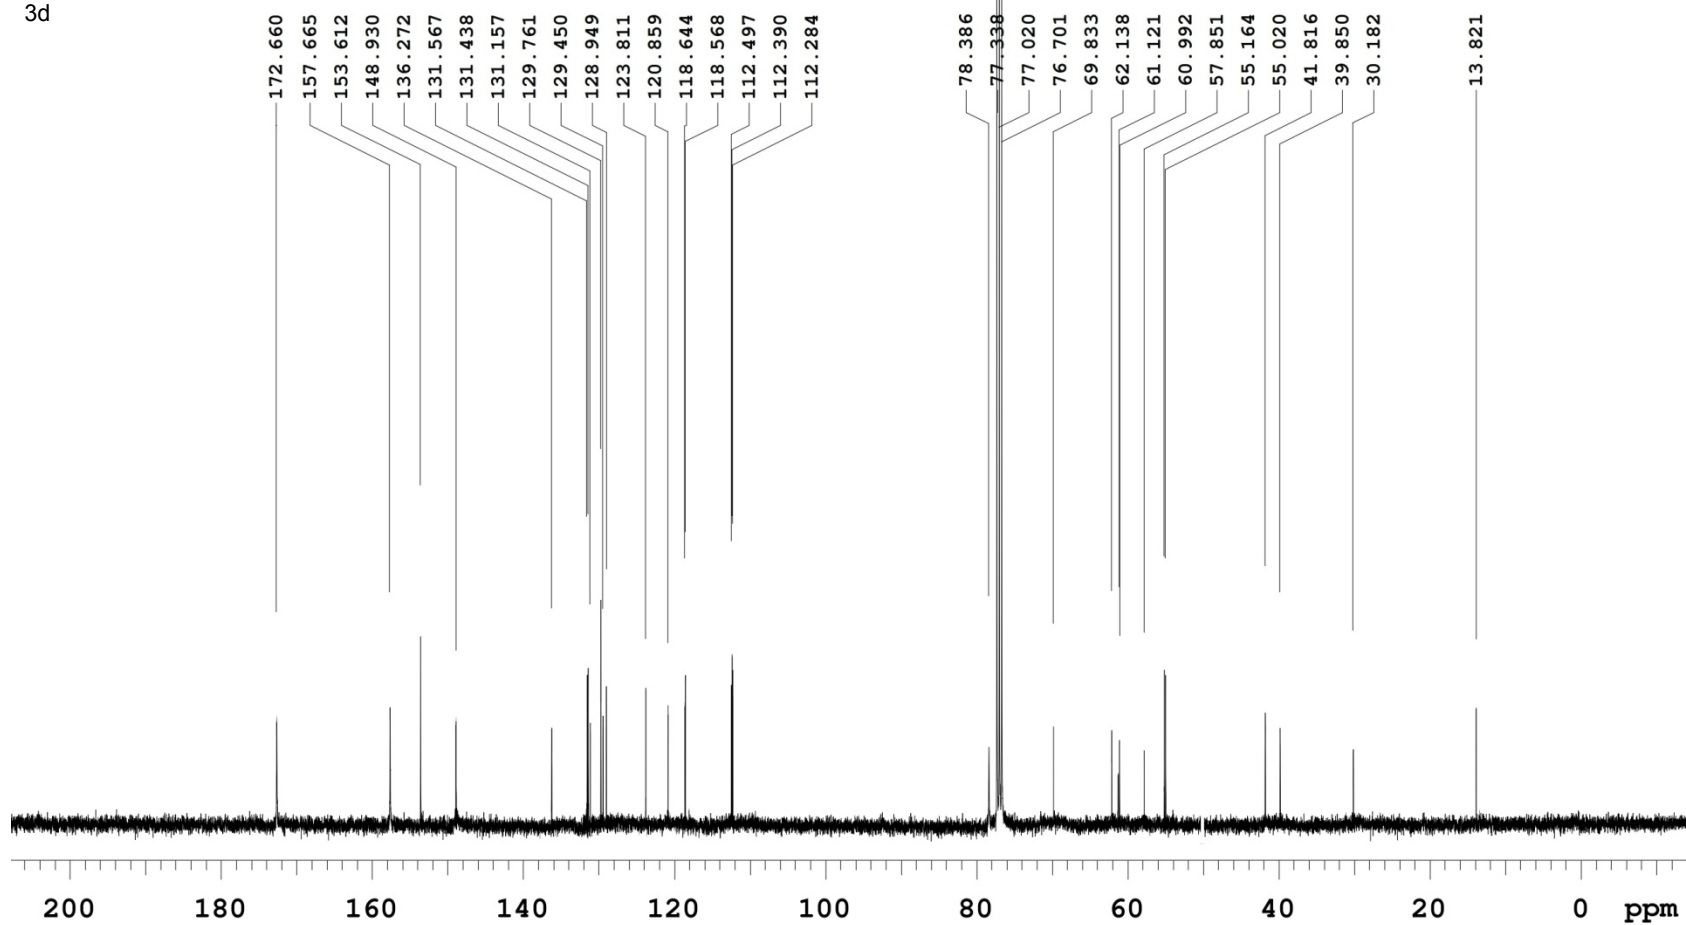

<sup>1</sup>H NMR of **3e** in CDCl<sub>3</sub>

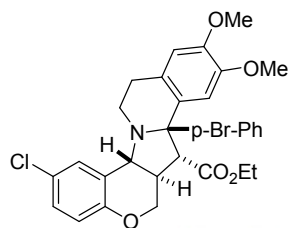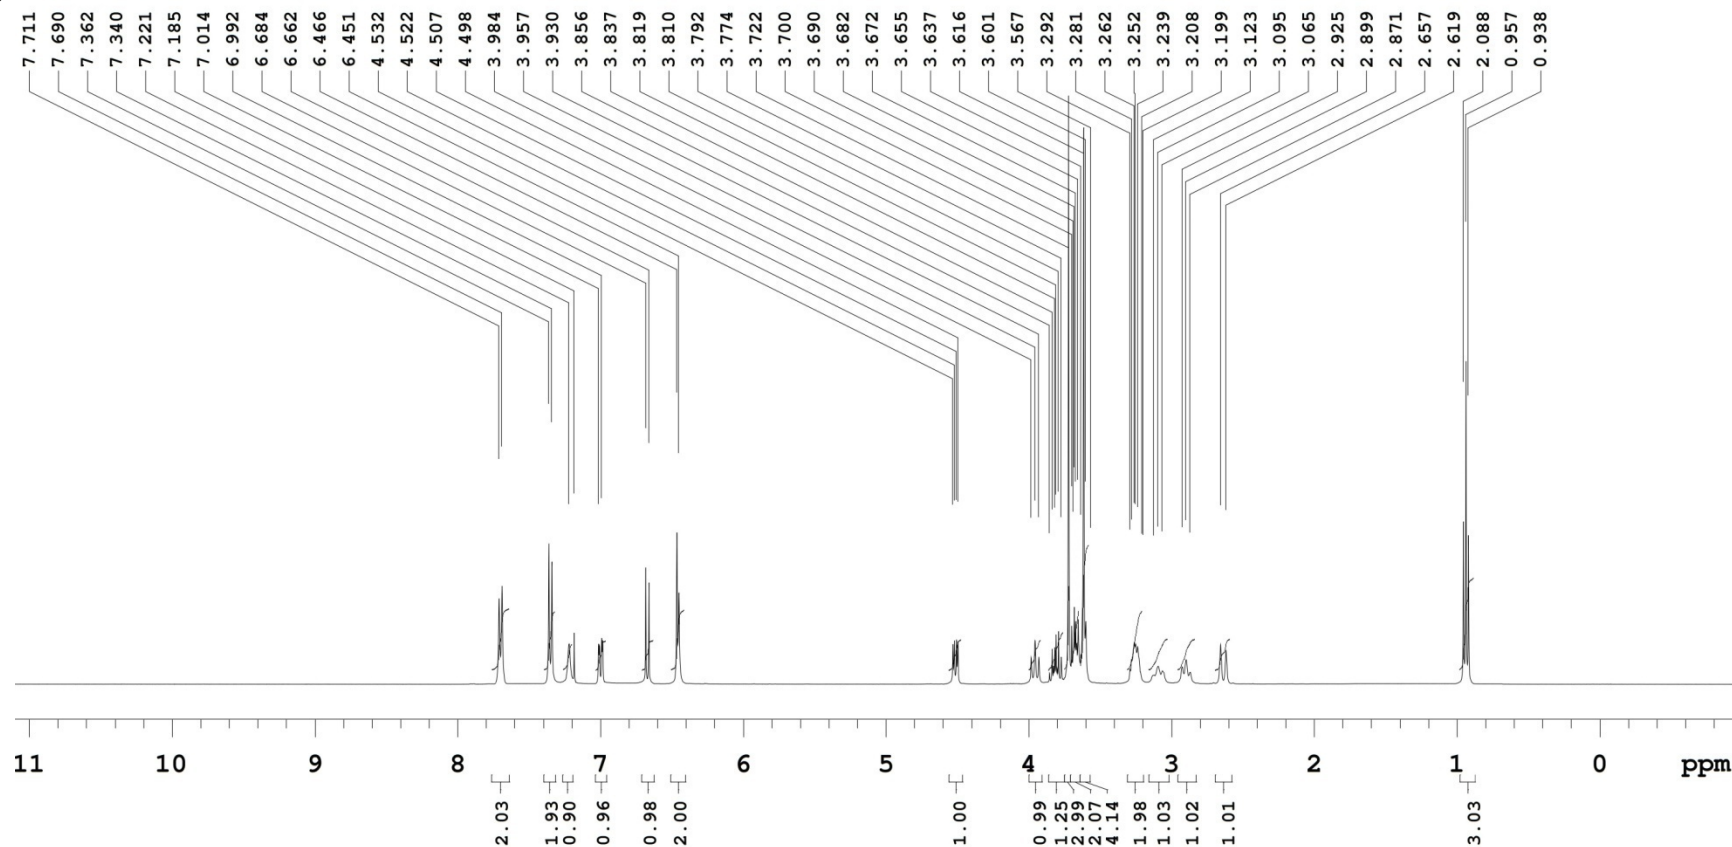

<sup>13</sup>C NMR of **3e** in CDCl<sub>3</sub>

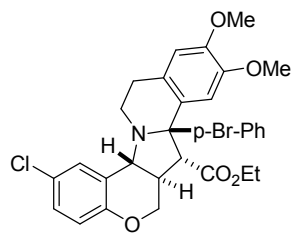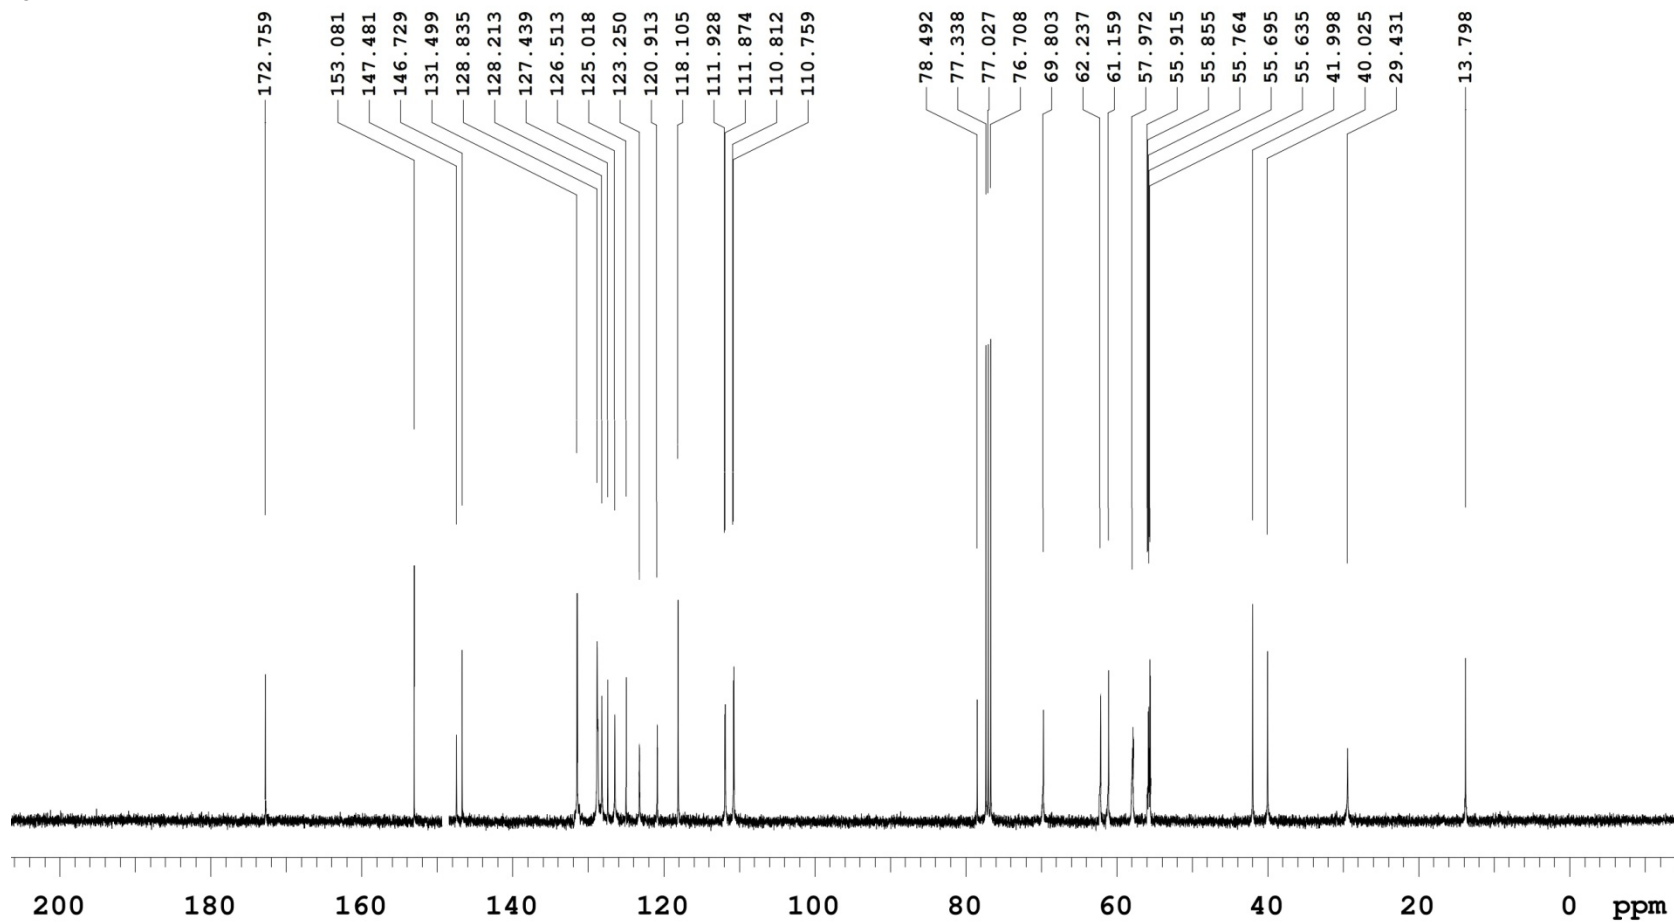

$^1\text{H}$  NMR of **3f** in  $\text{CDCl}_3$

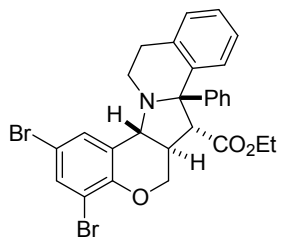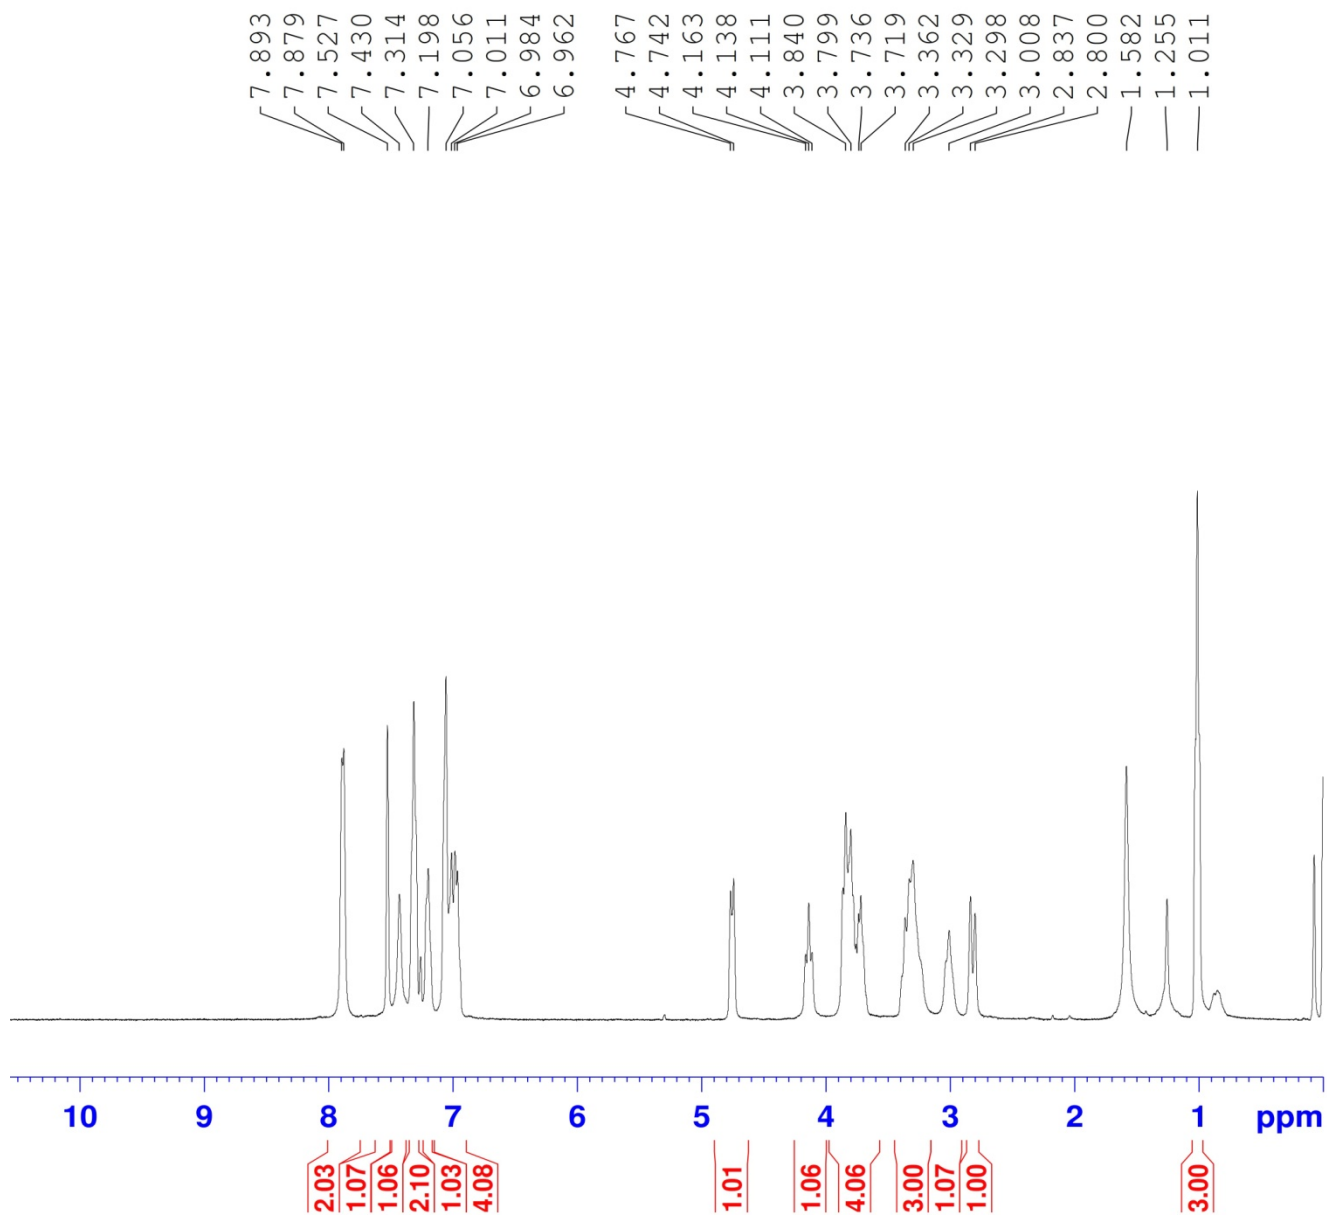

$^{13}\text{C}$  NMR of **3f** in  $\text{CDCl}_3$

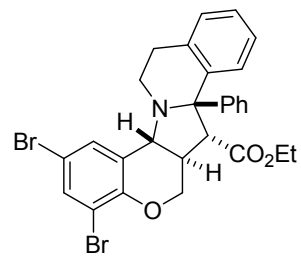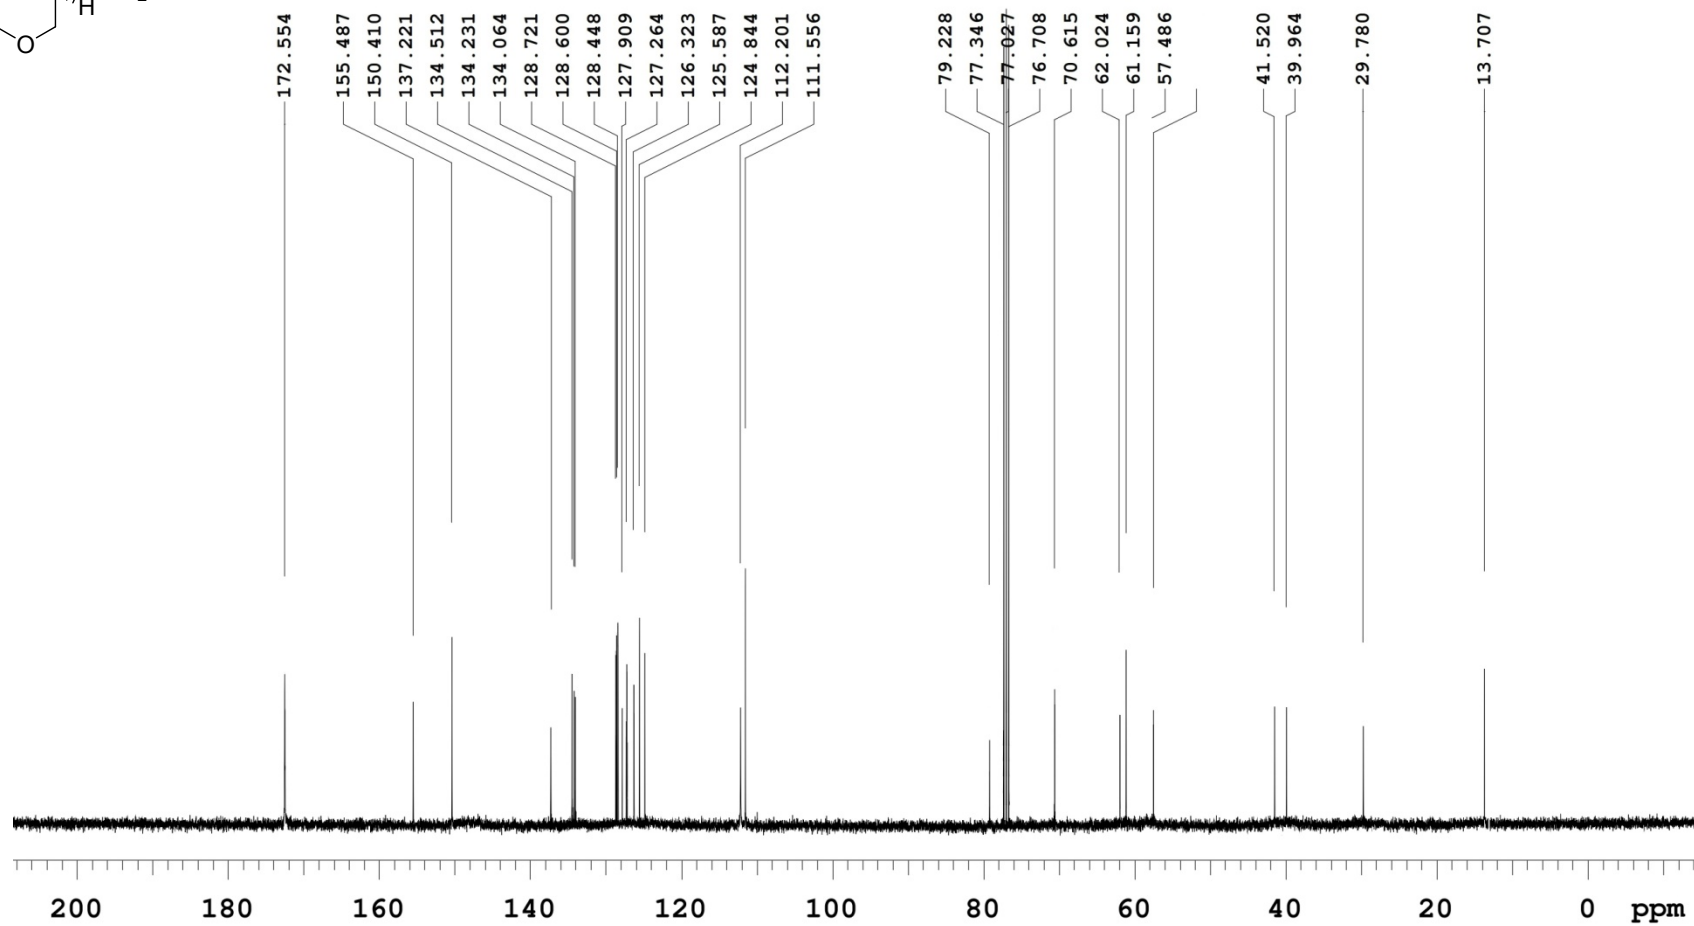

<sup>1</sup>H NMR of **3g** in CDCl<sub>3</sub>

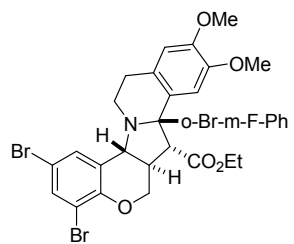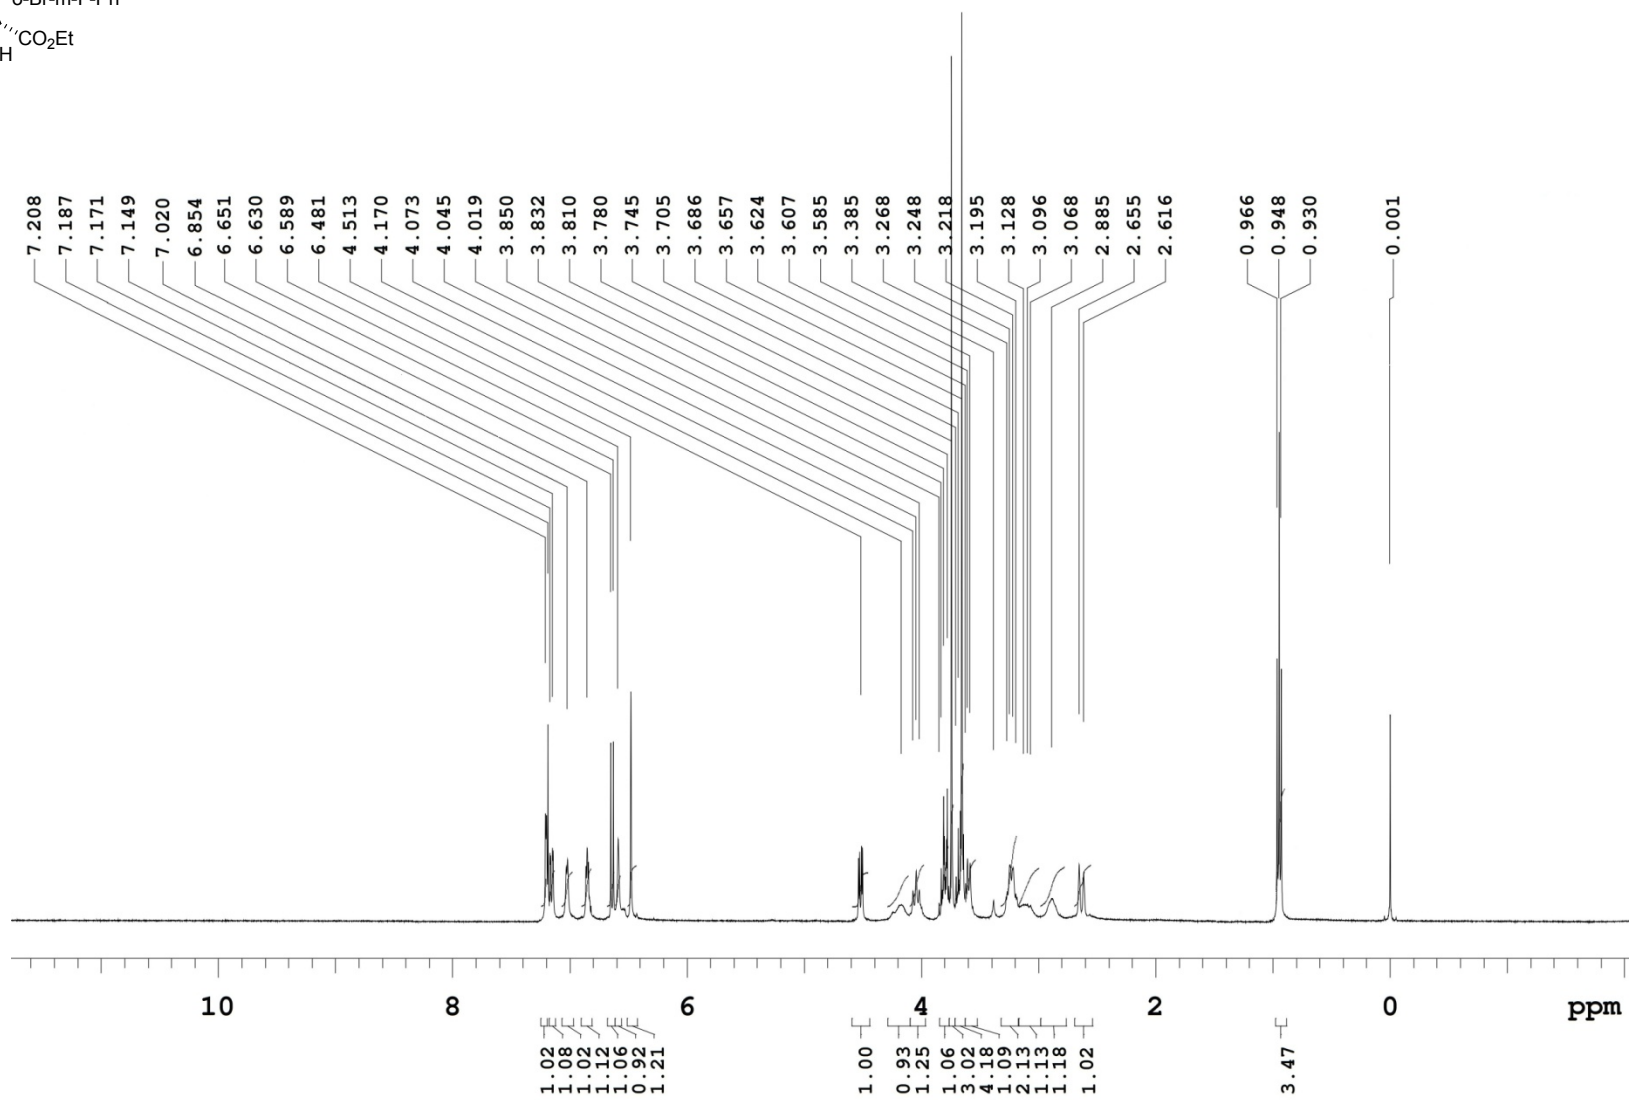

$^{13}\text{C}$  NMR of **3g** in  $\text{CDCl}_3$

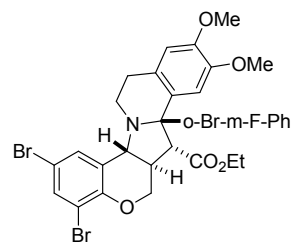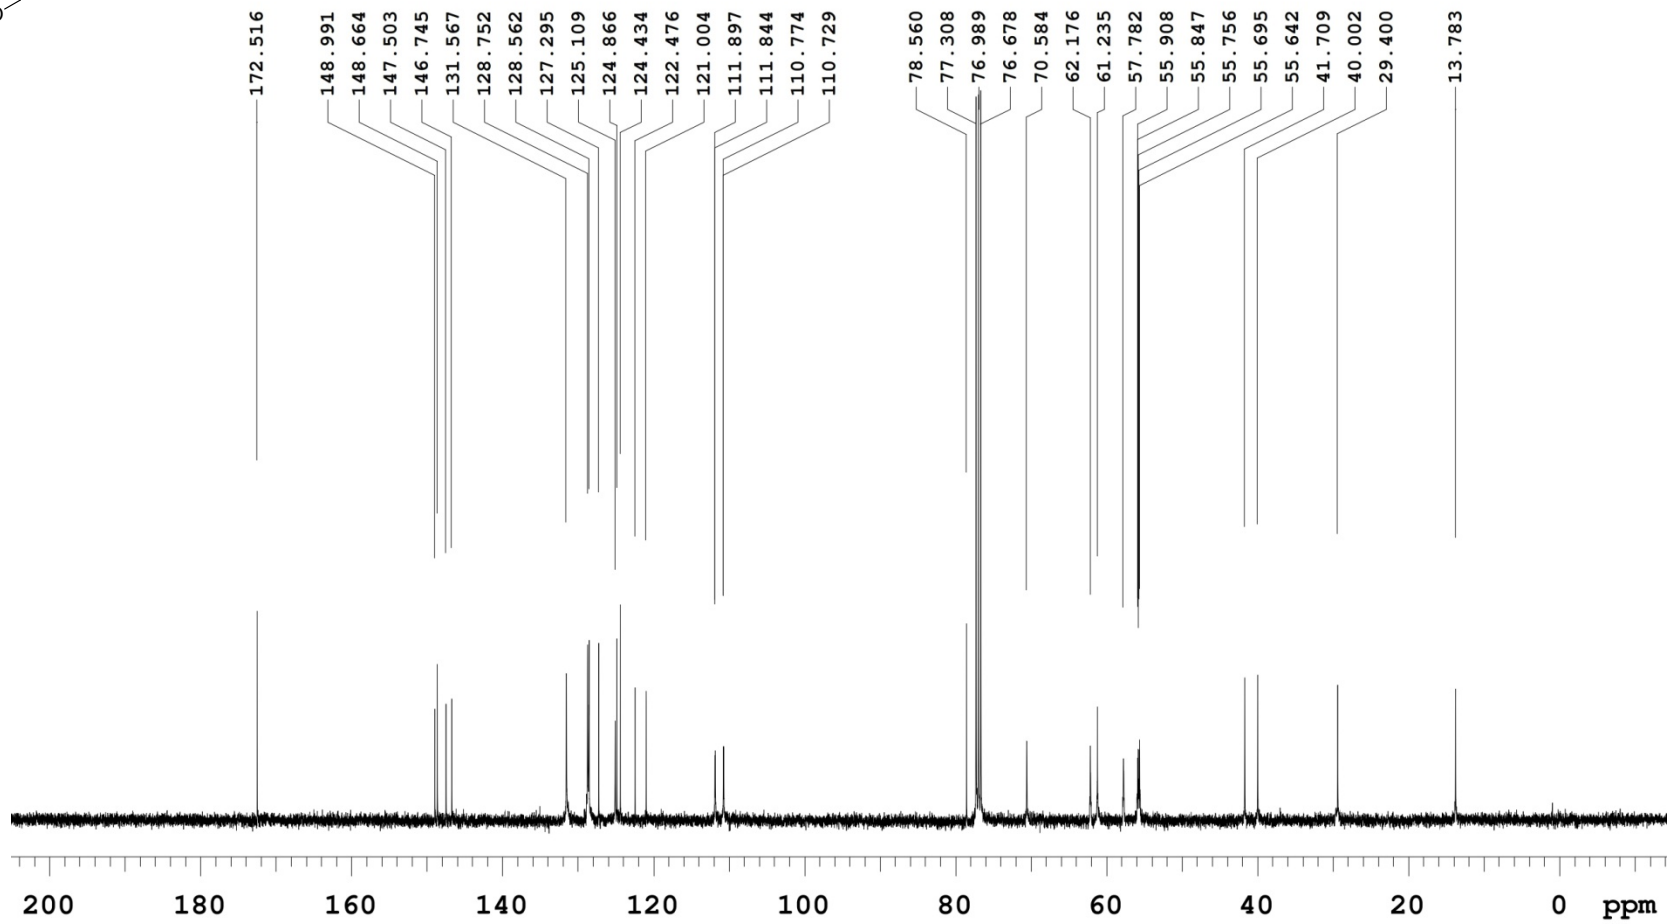



<sup>1</sup>H NMR of **3h** in CDCl<sub>3</sub>

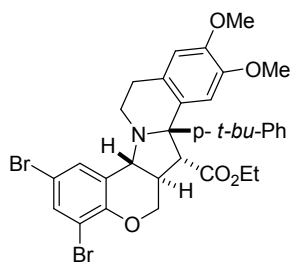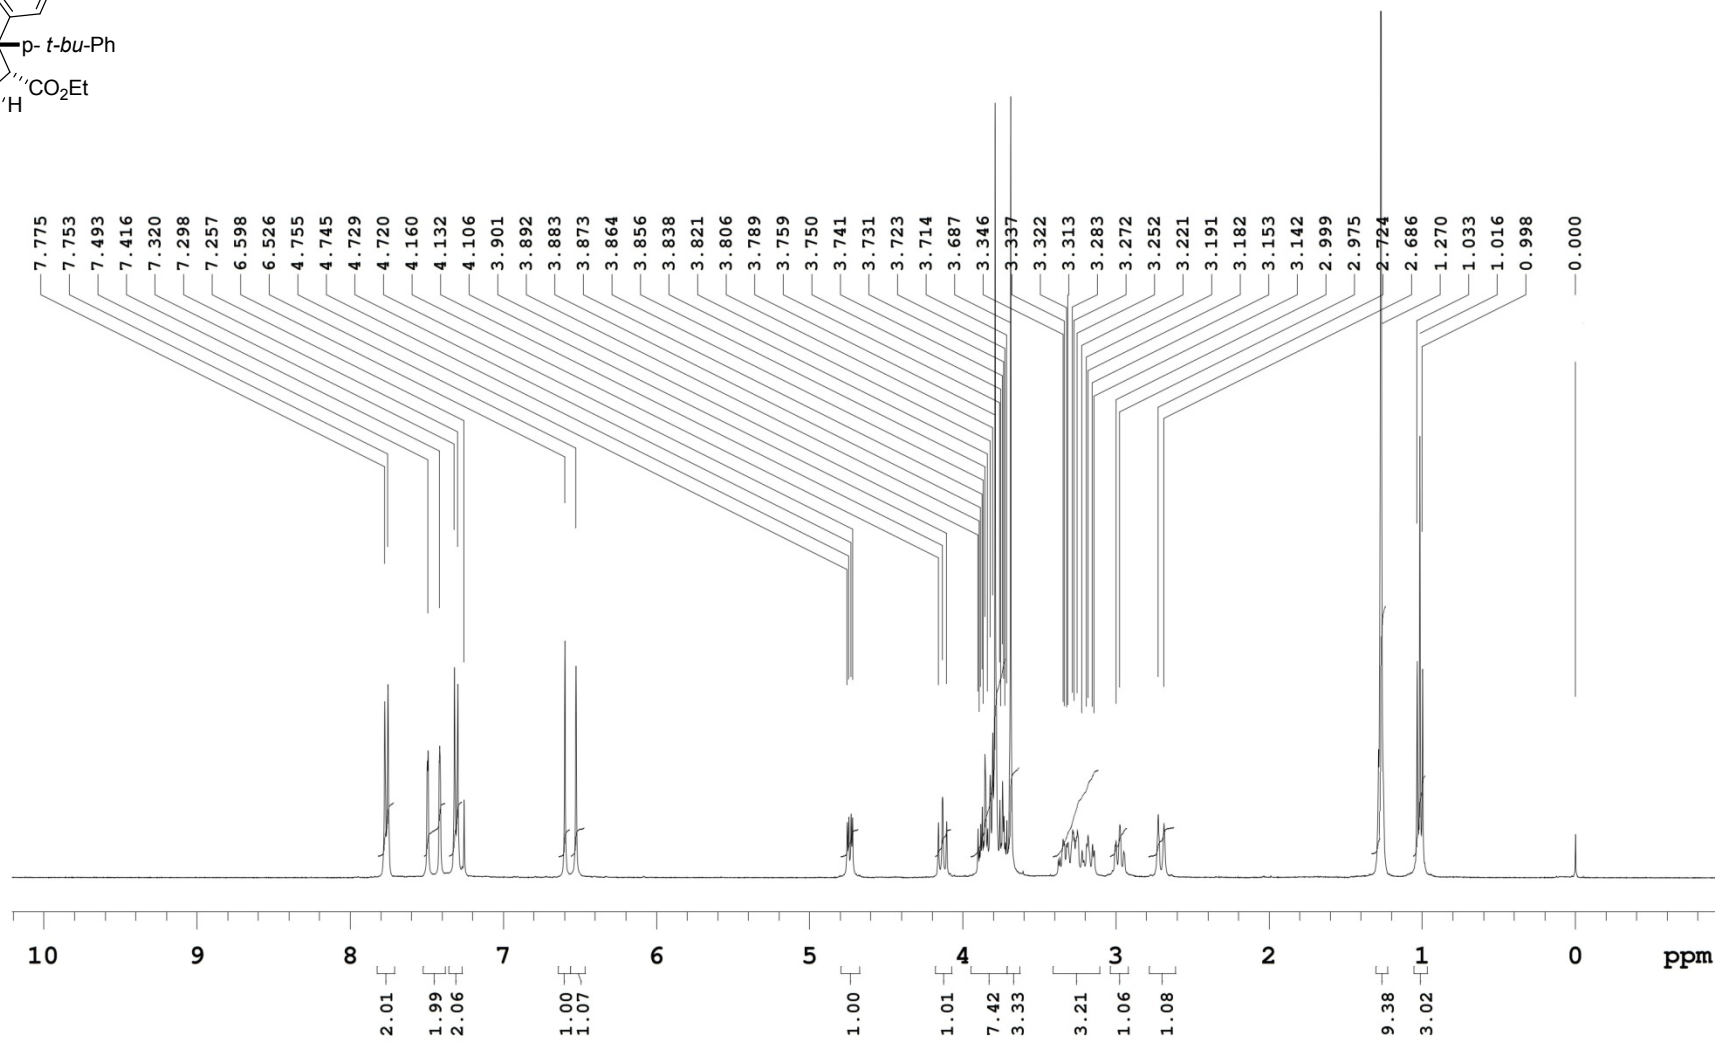

<sup>13</sup>C NMR of **3h** in CDCl<sub>3</sub>

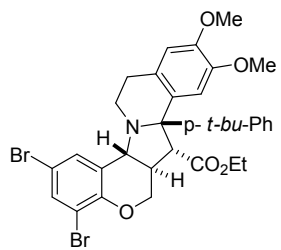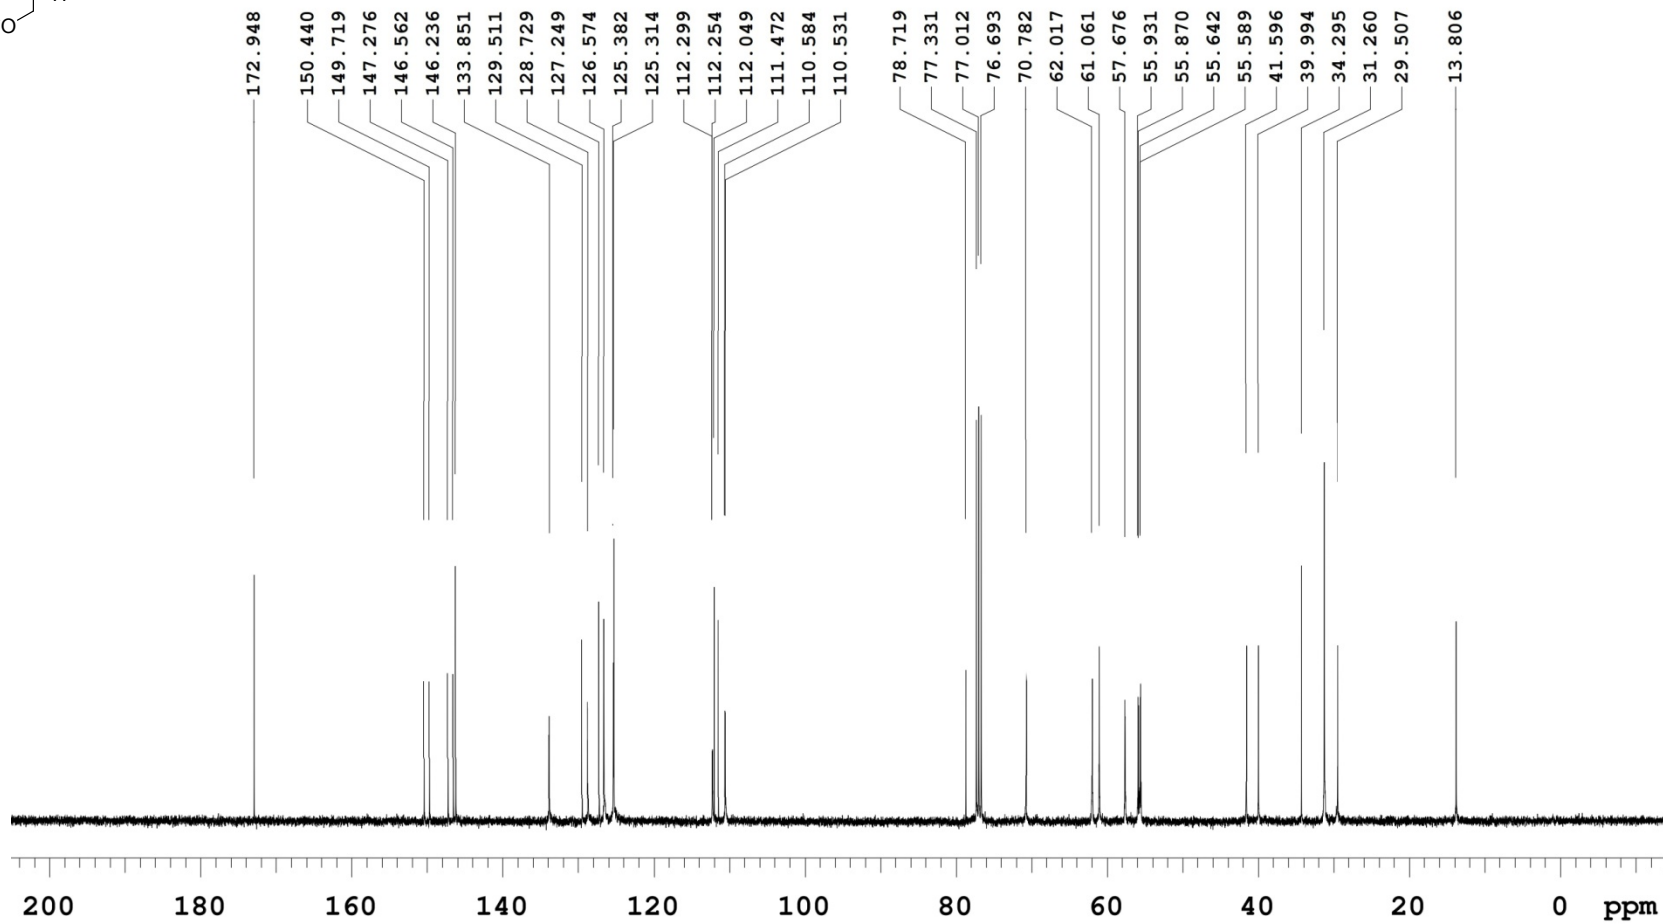

<sup>1</sup>H NMR of **3i** in CDCl<sub>3</sub>

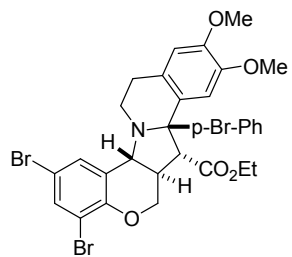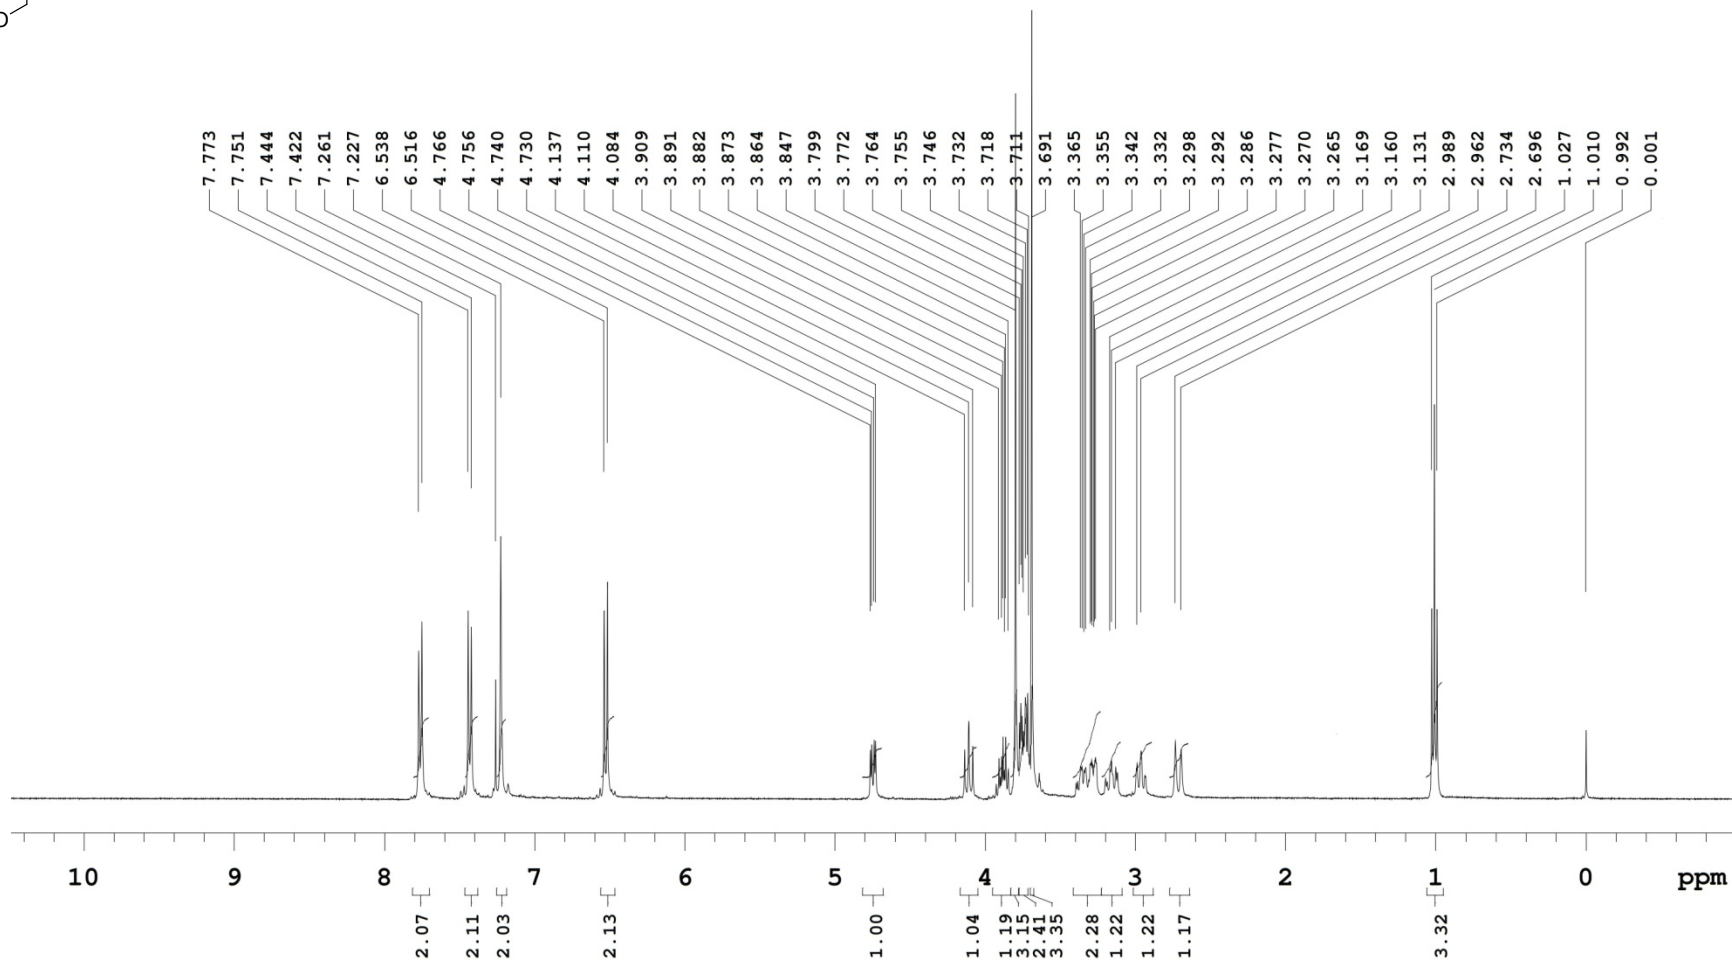

<sup>13</sup>C NMR of **3i** in CDCl<sub>3</sub>

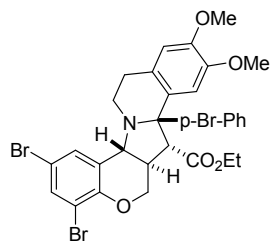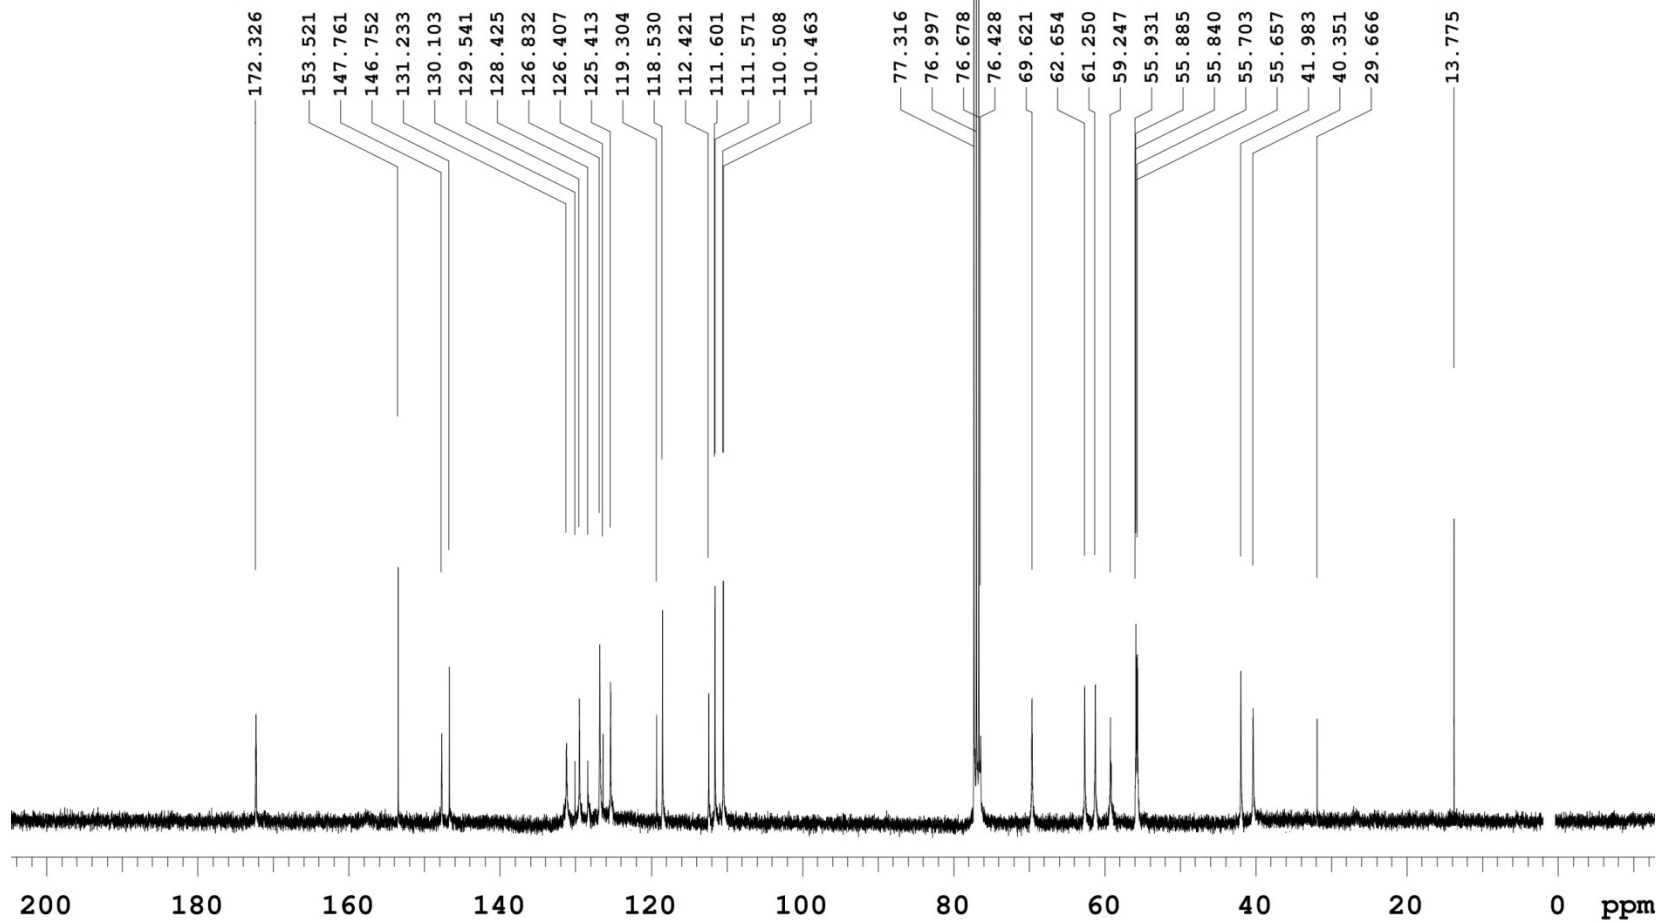

<sup>1</sup>H NMR of **3j** in CDCl<sub>3</sub>

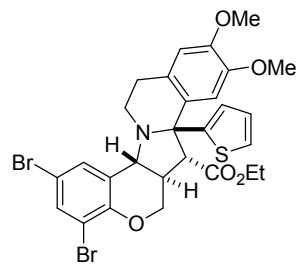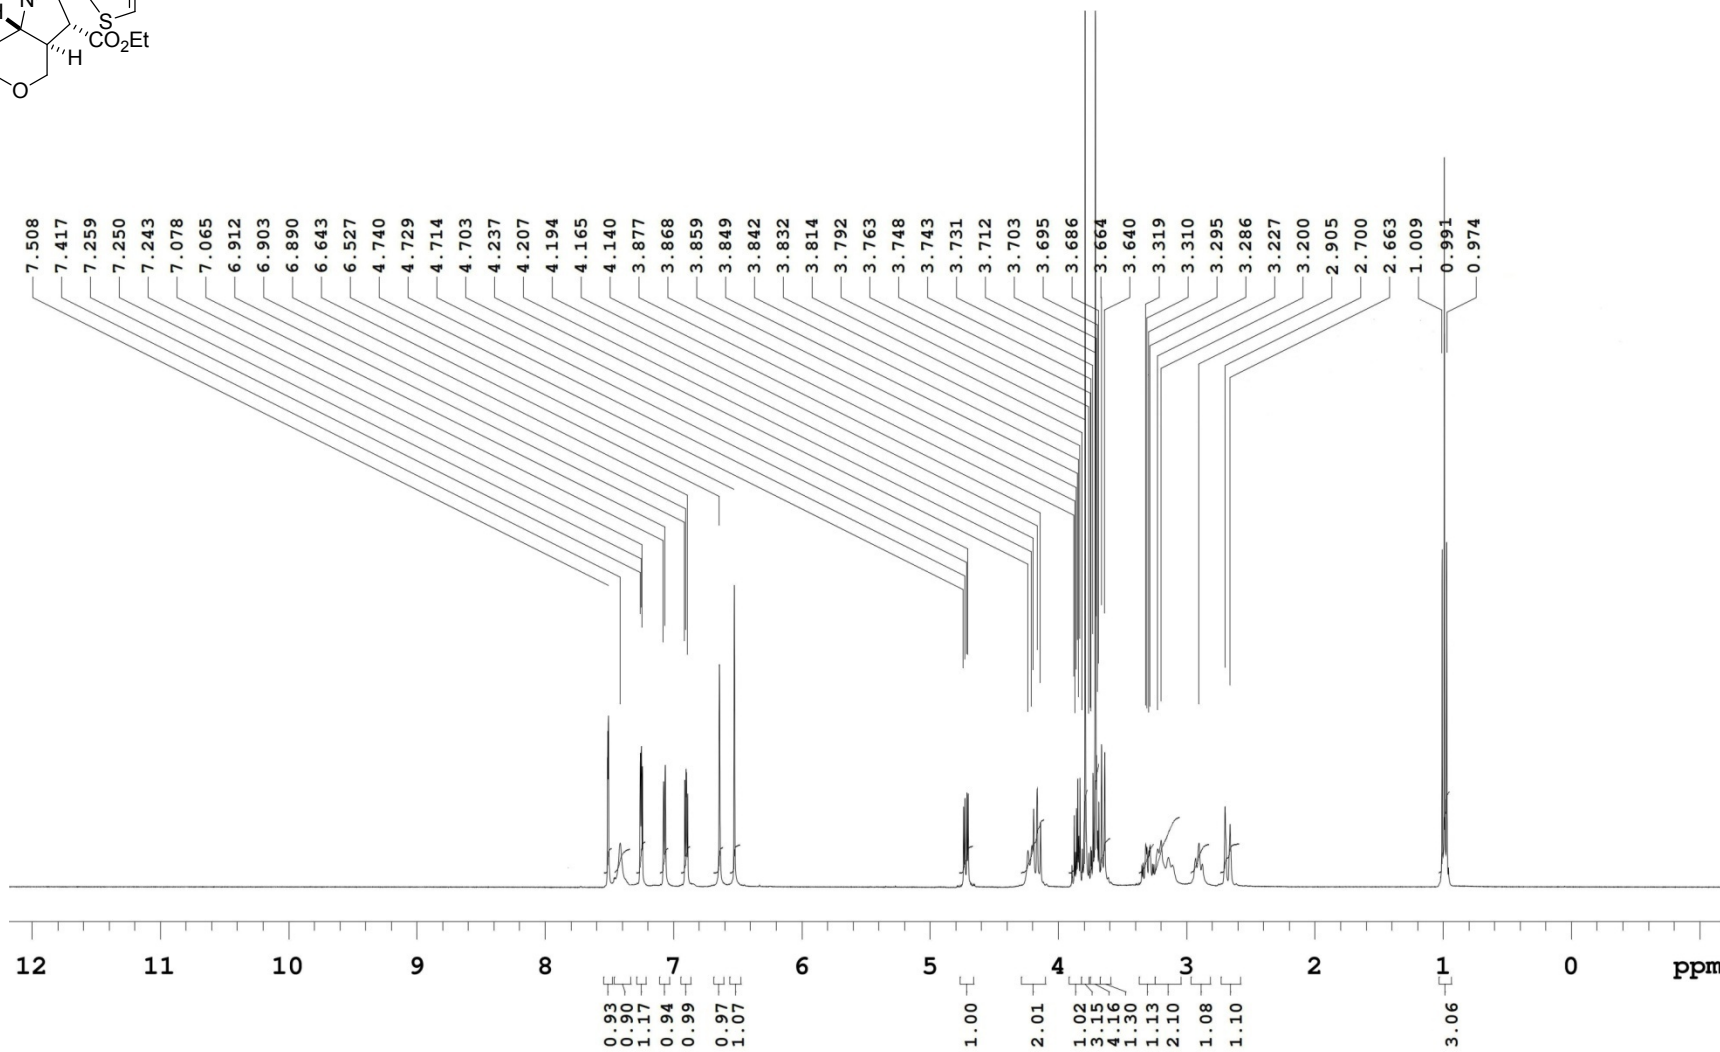

$^{13}\text{C}$  NMR of **3j** in  $\text{CDCl}_3$

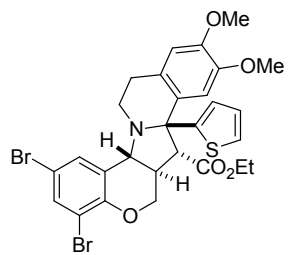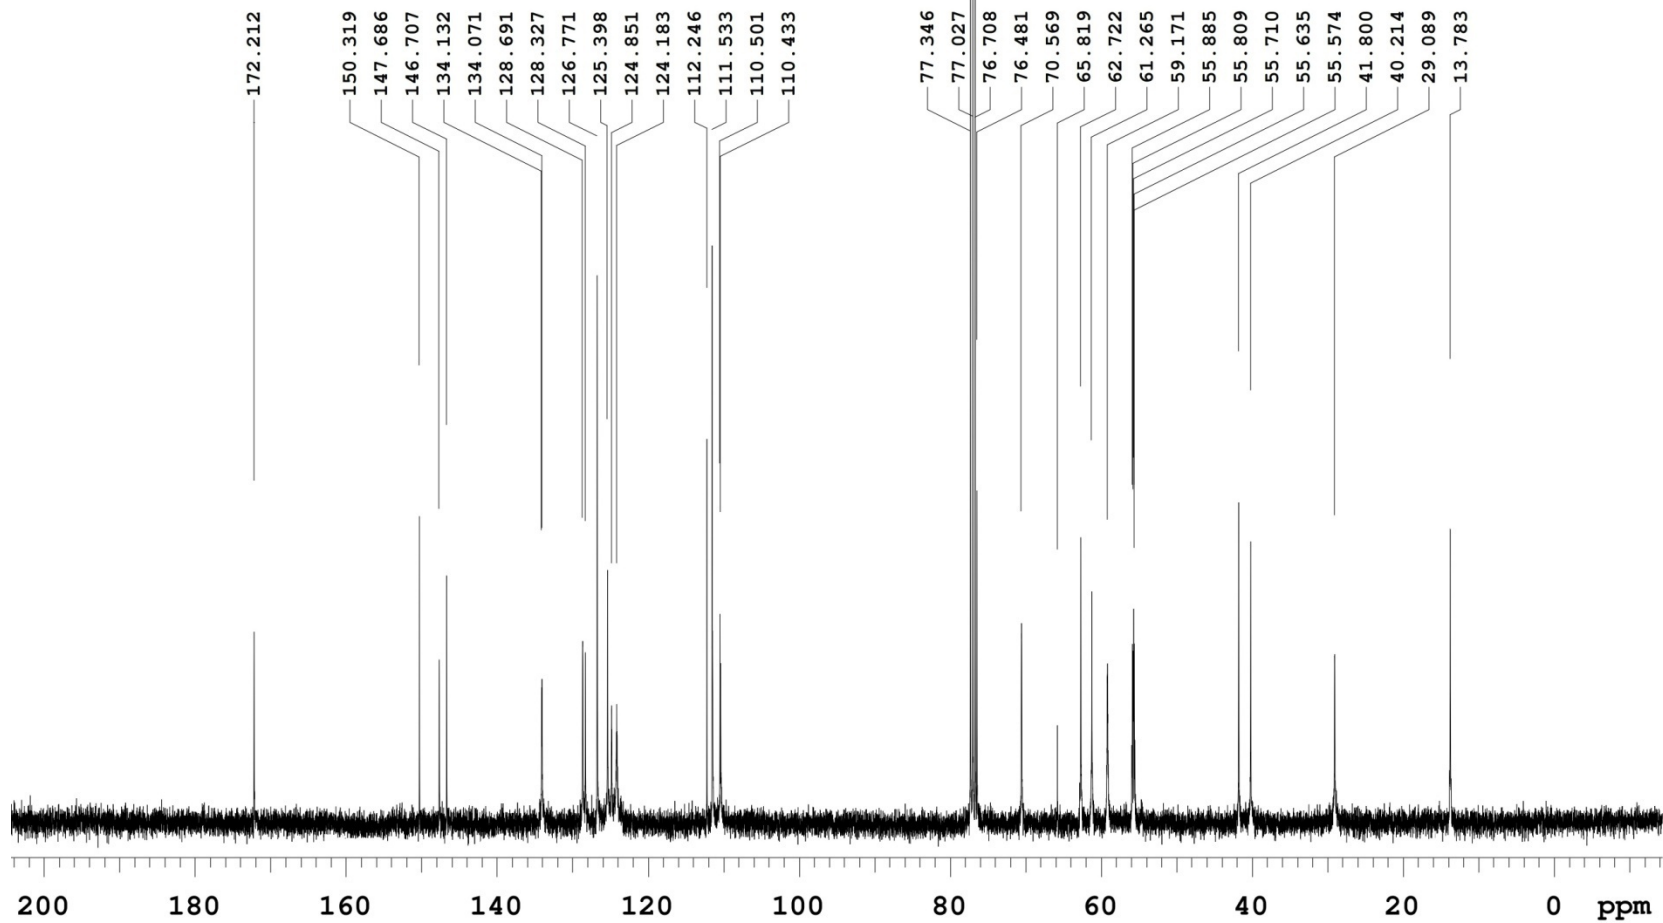

<sup>1</sup>H NMR of **3k** in CDCl<sub>3</sub>

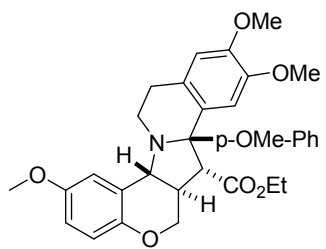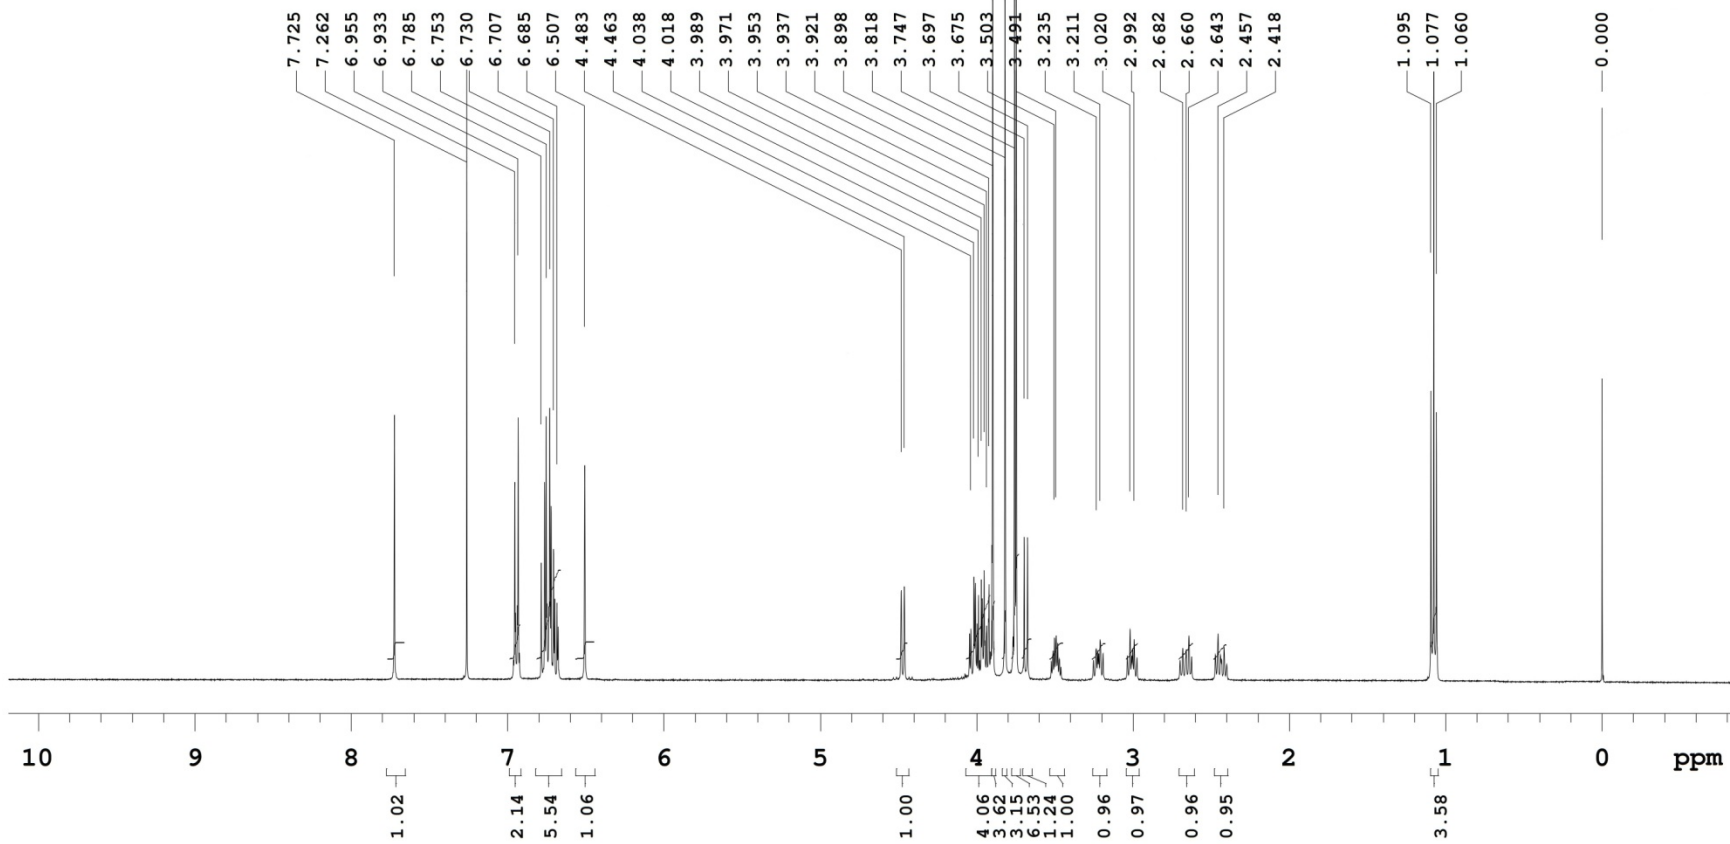

<sup>13</sup>C NMR of **3k** in CDCl<sub>3</sub>

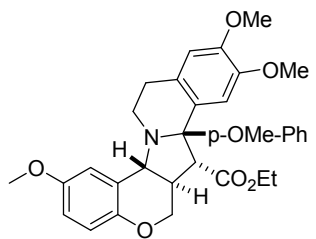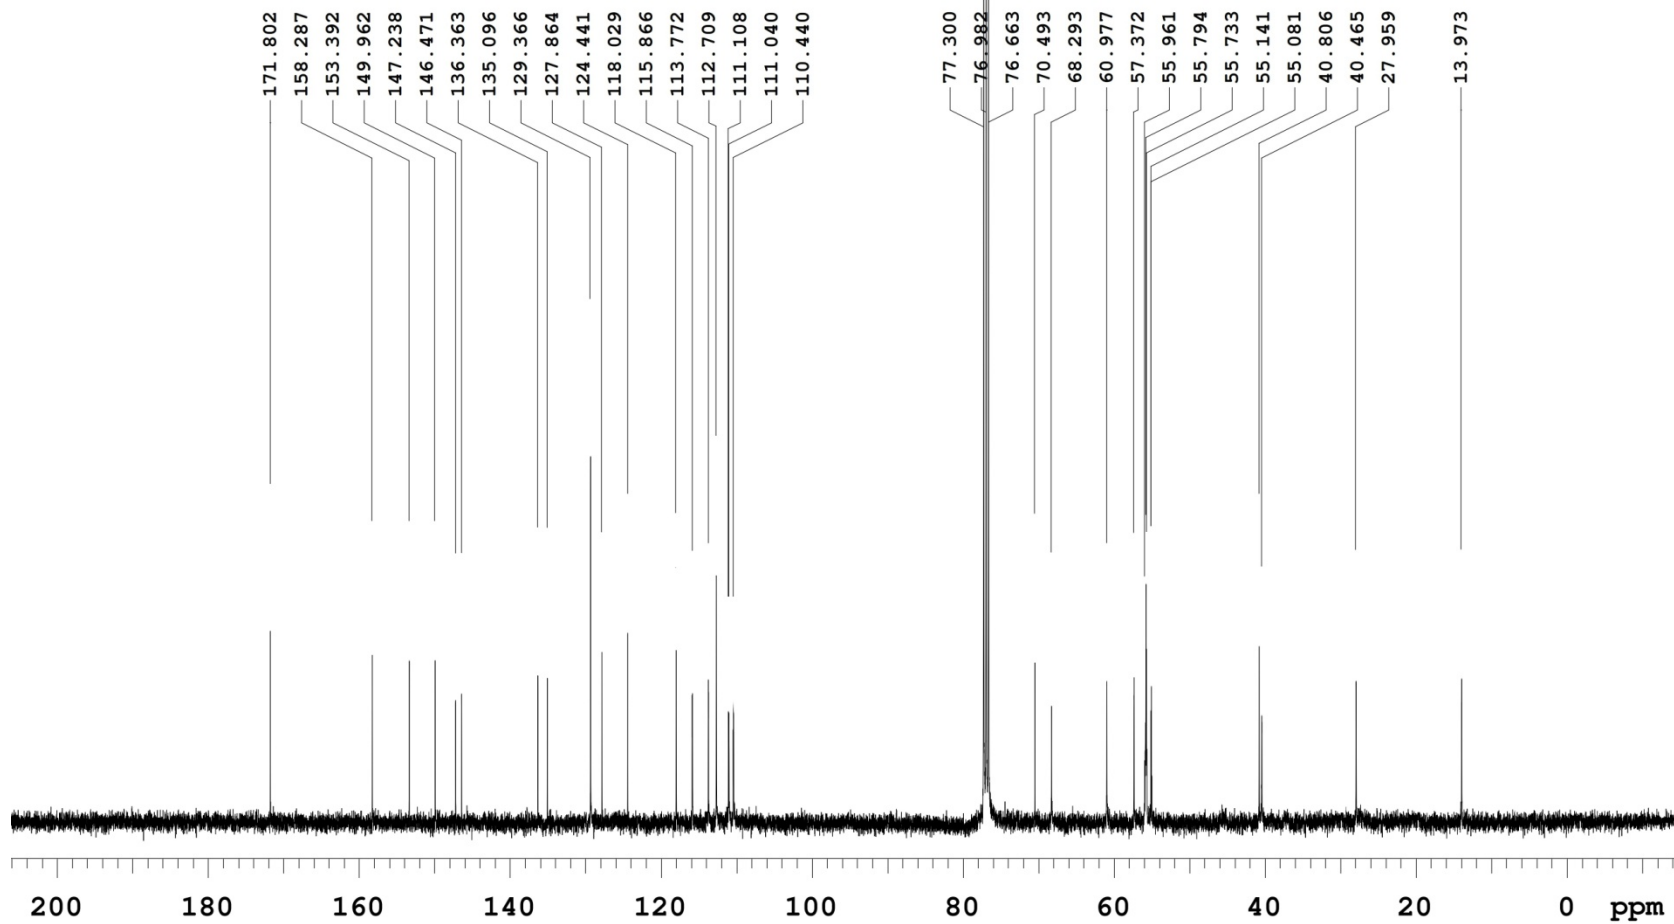



<sup>1</sup>H NMR of **31** in CDCl<sub>3</sub>

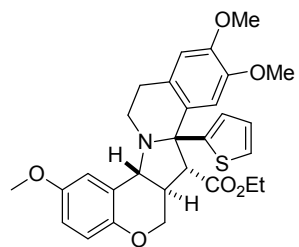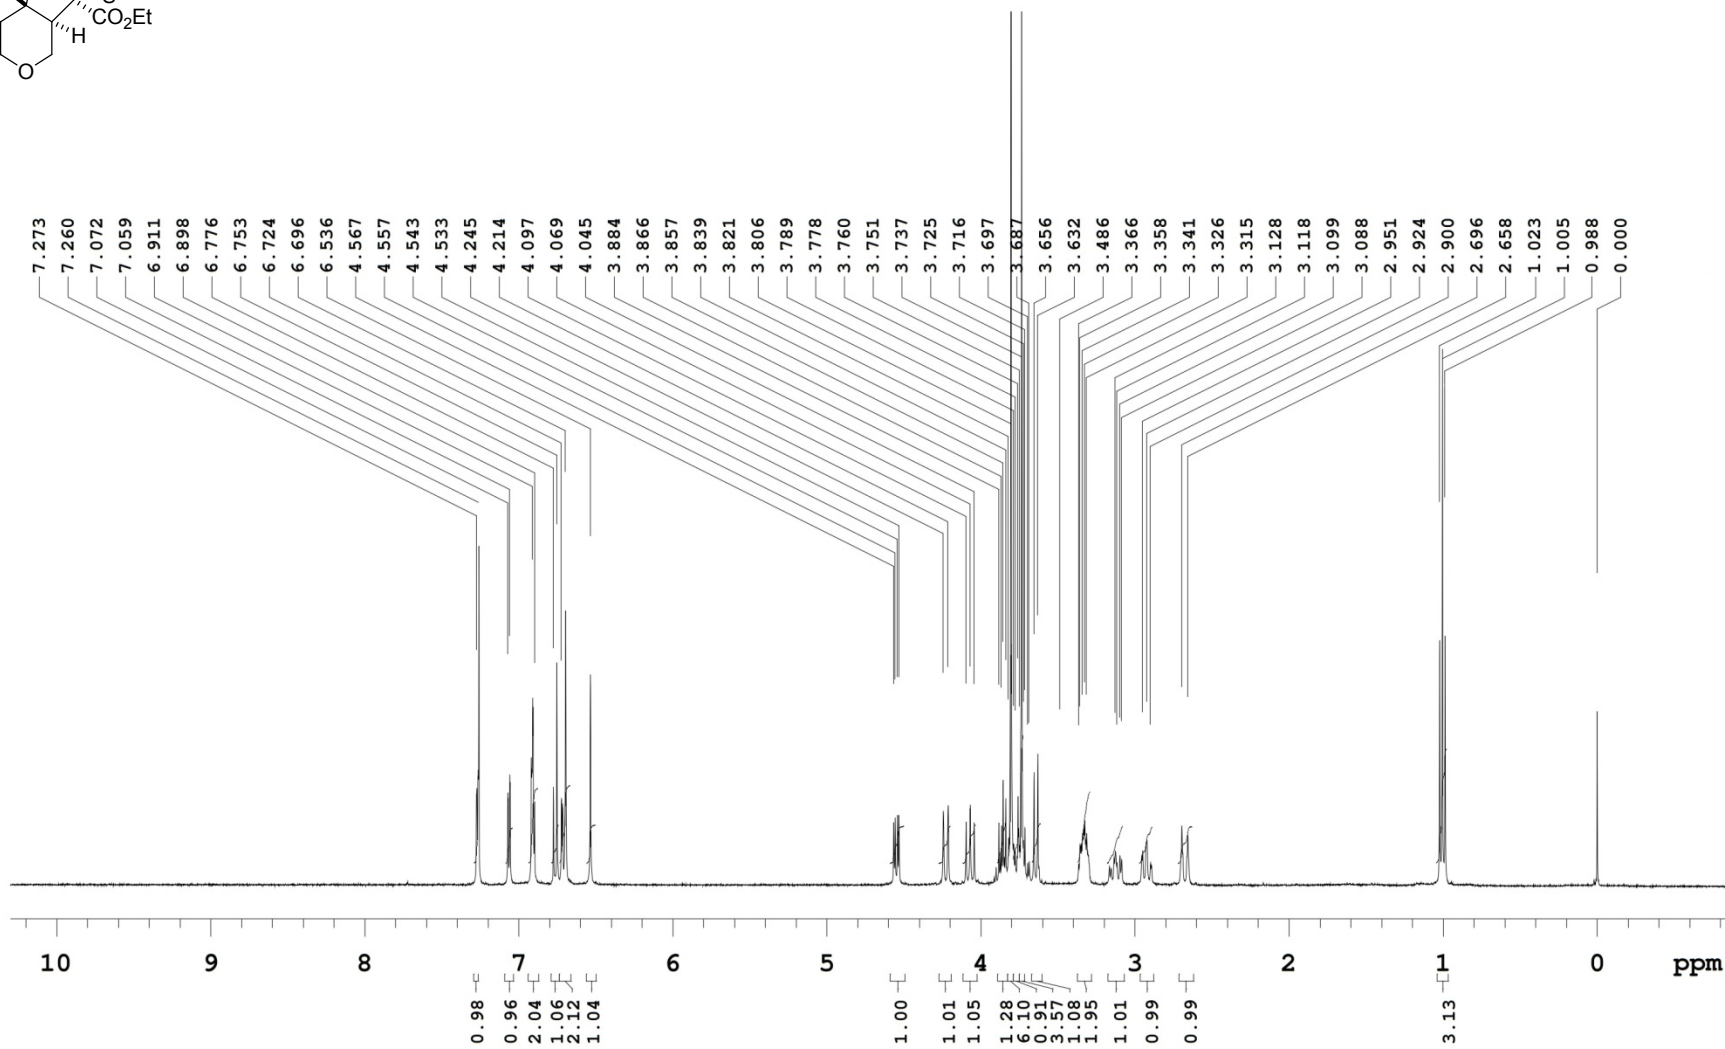

<sup>13</sup>C NMR of **31** in CDCl<sub>3</sub>

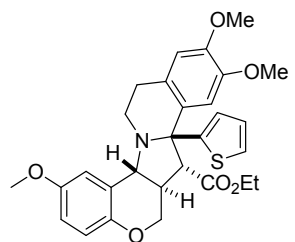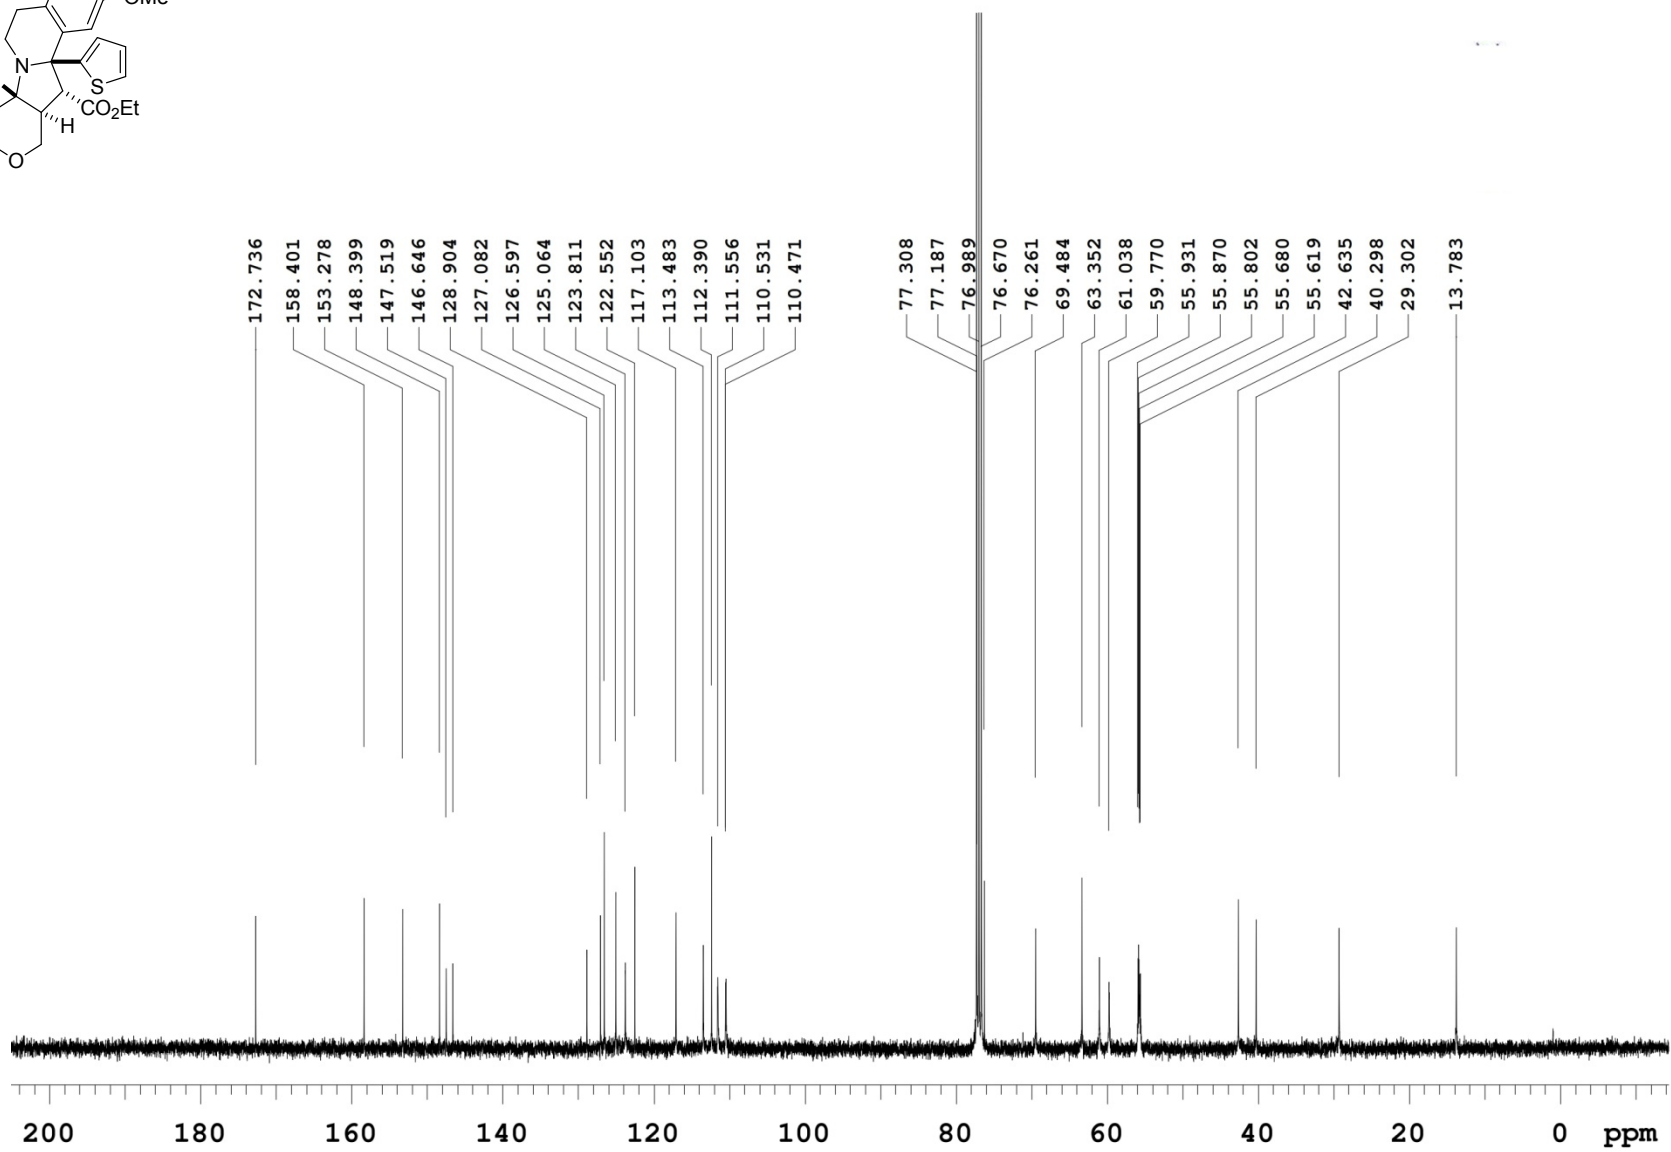

<sup>13</sup>C NMR of **3m** in CDCl<sub>3</sub>

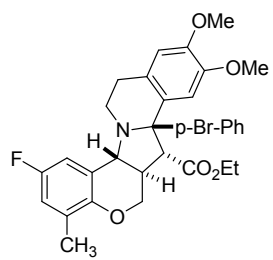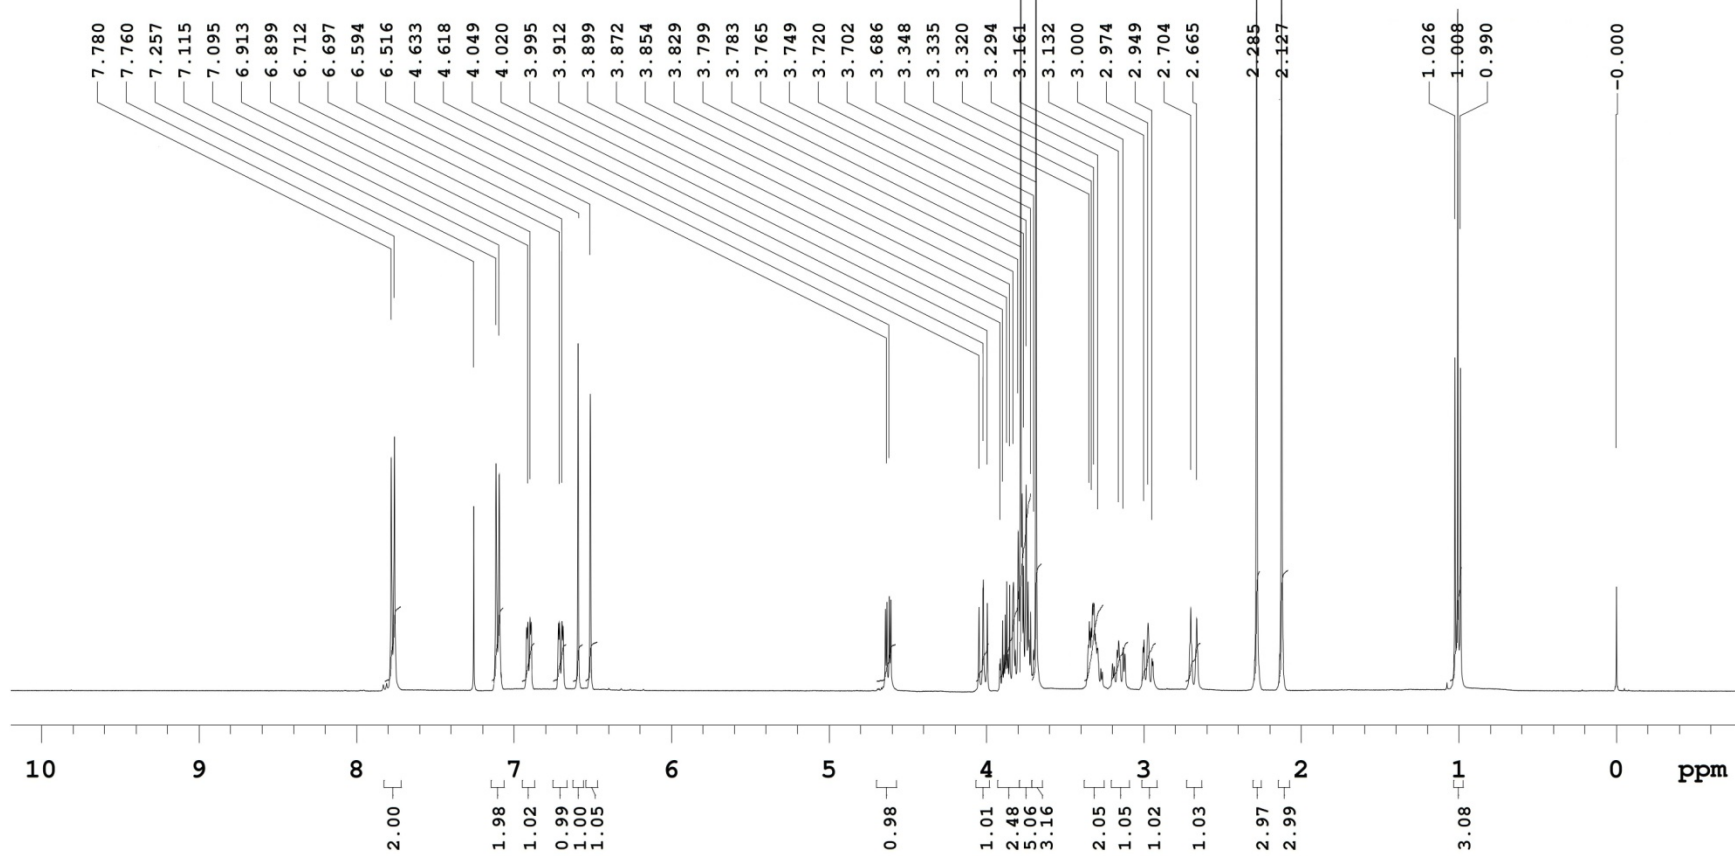

$^{13}\text{C}$  NMR of 3m in  $\text{CDCl}_3$

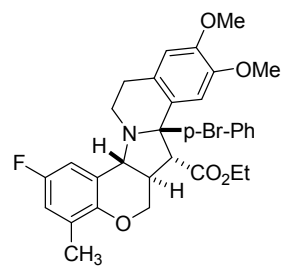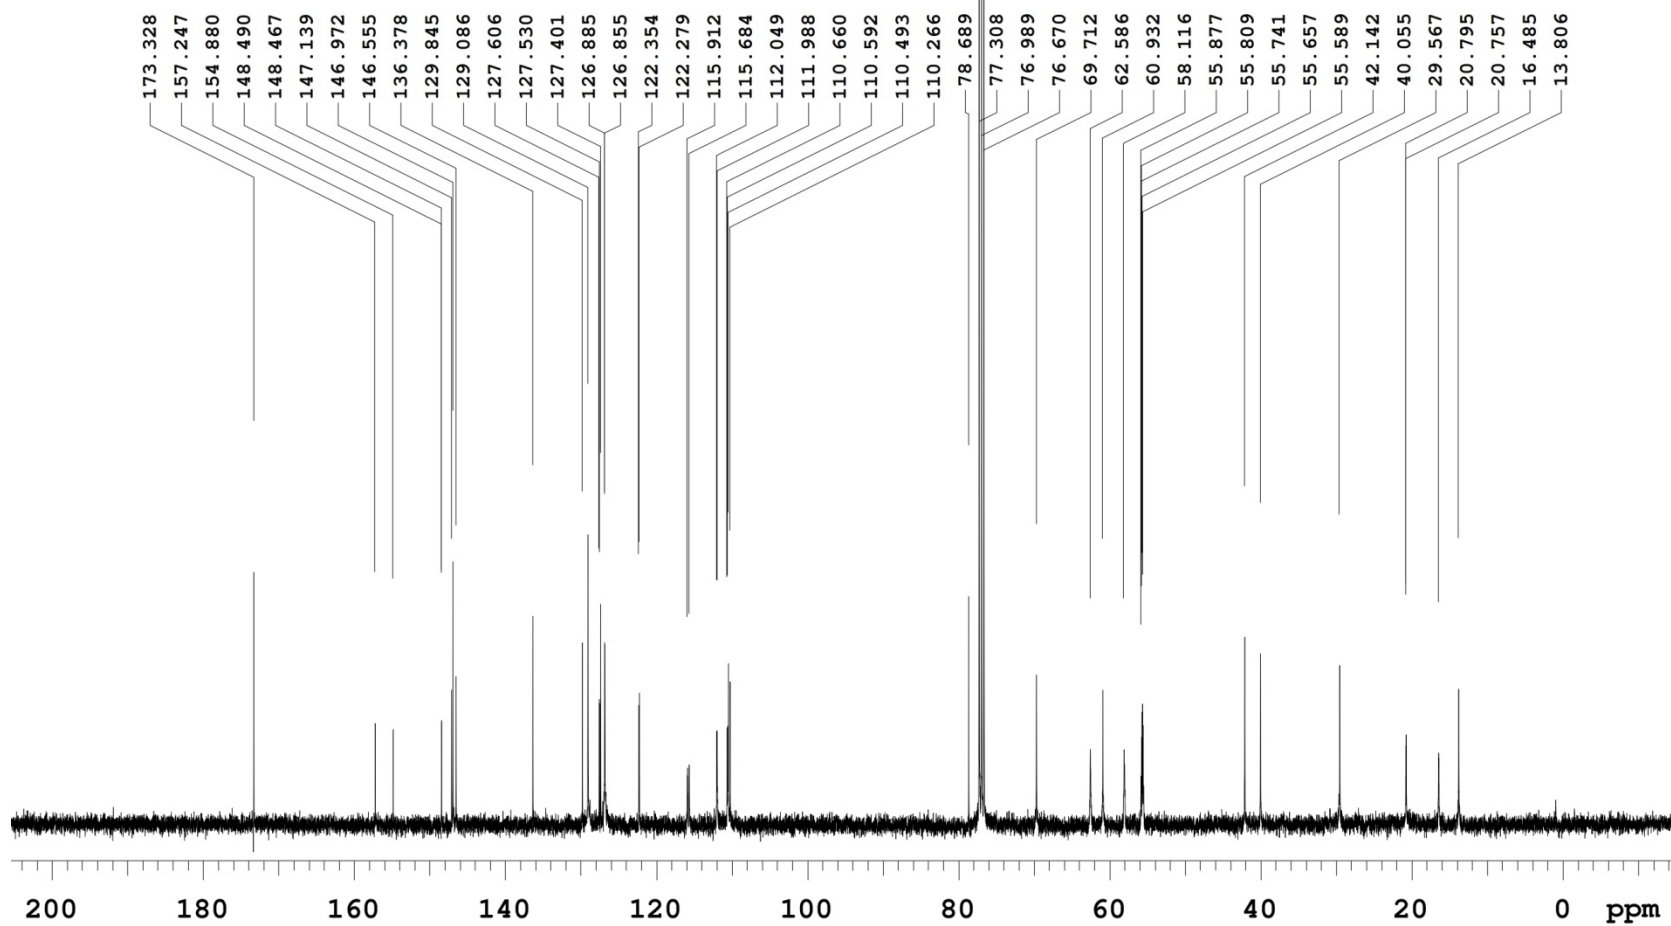

<sup>1</sup>H NMR of **3n** in CDCl<sub>3</sub>

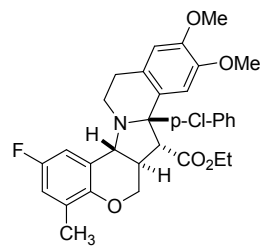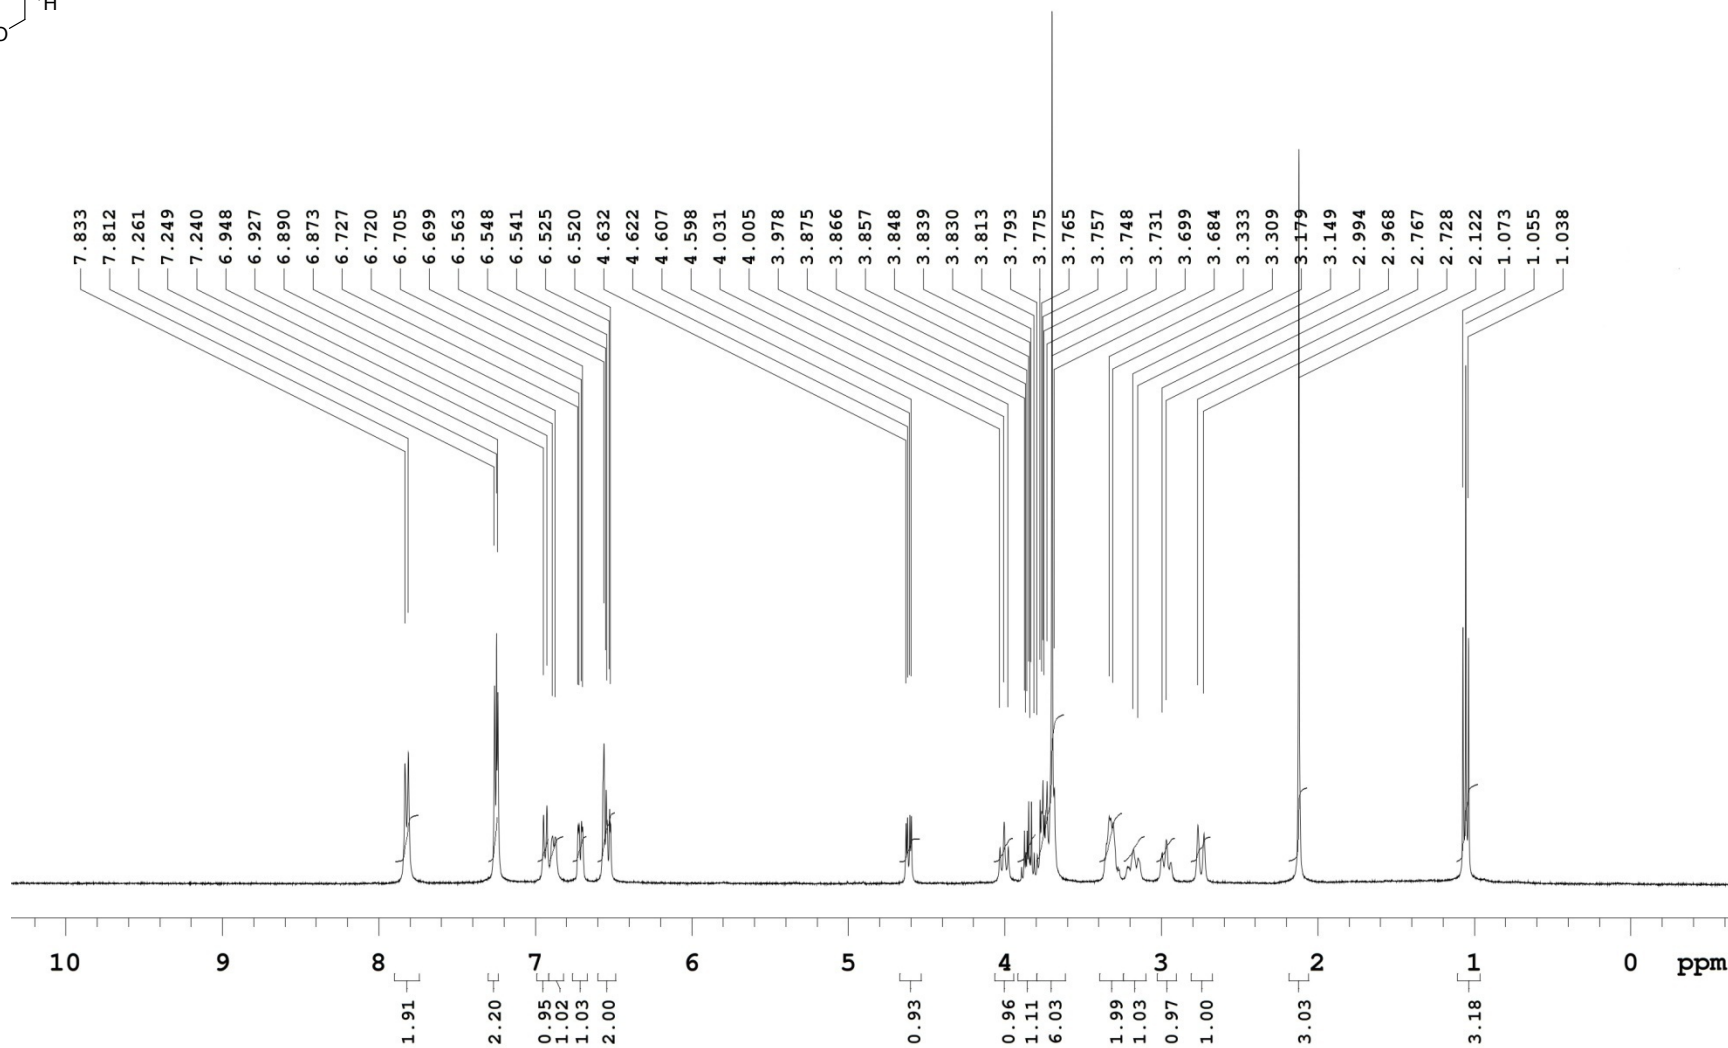

<sup>13</sup>C NMR of **3n** in CDCl<sub>3</sub>

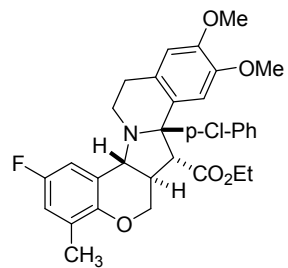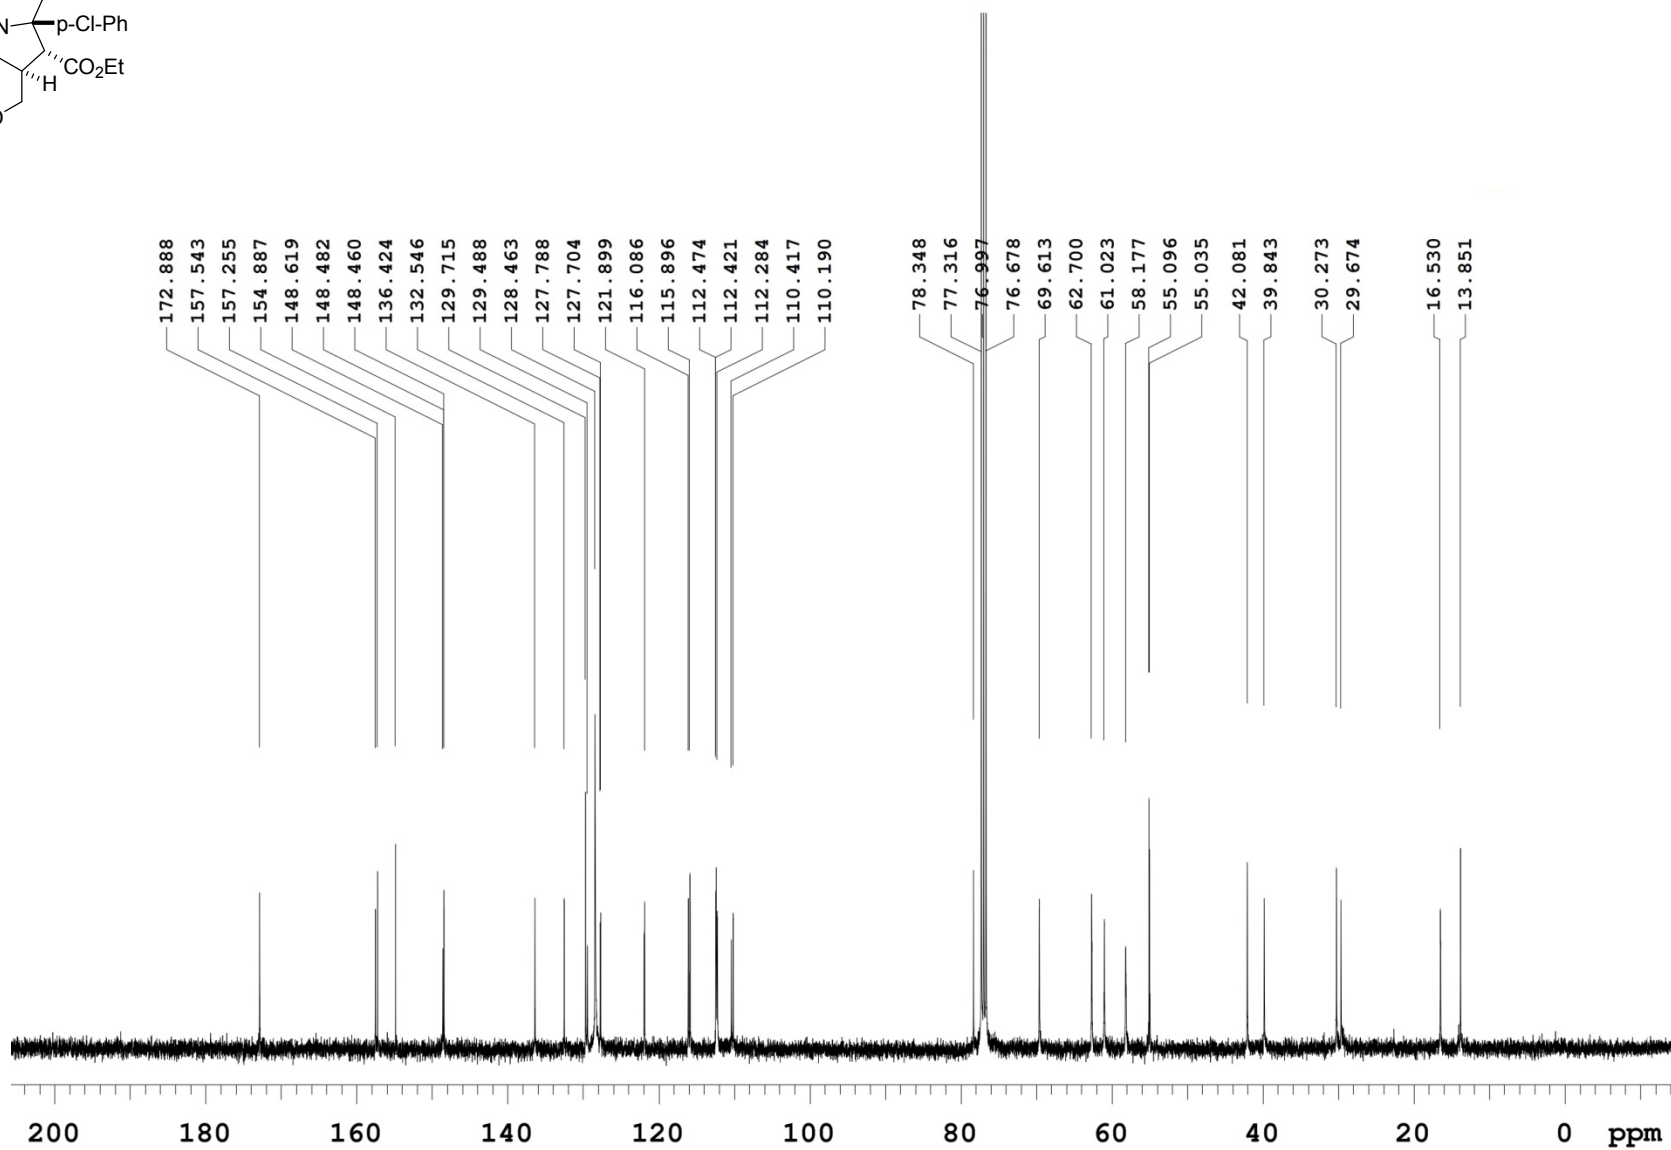

<sup>1</sup>H NMR of **3o** in CDCl<sub>3</sub>

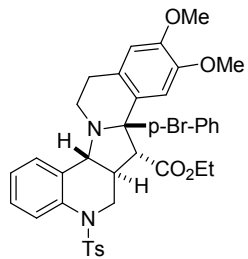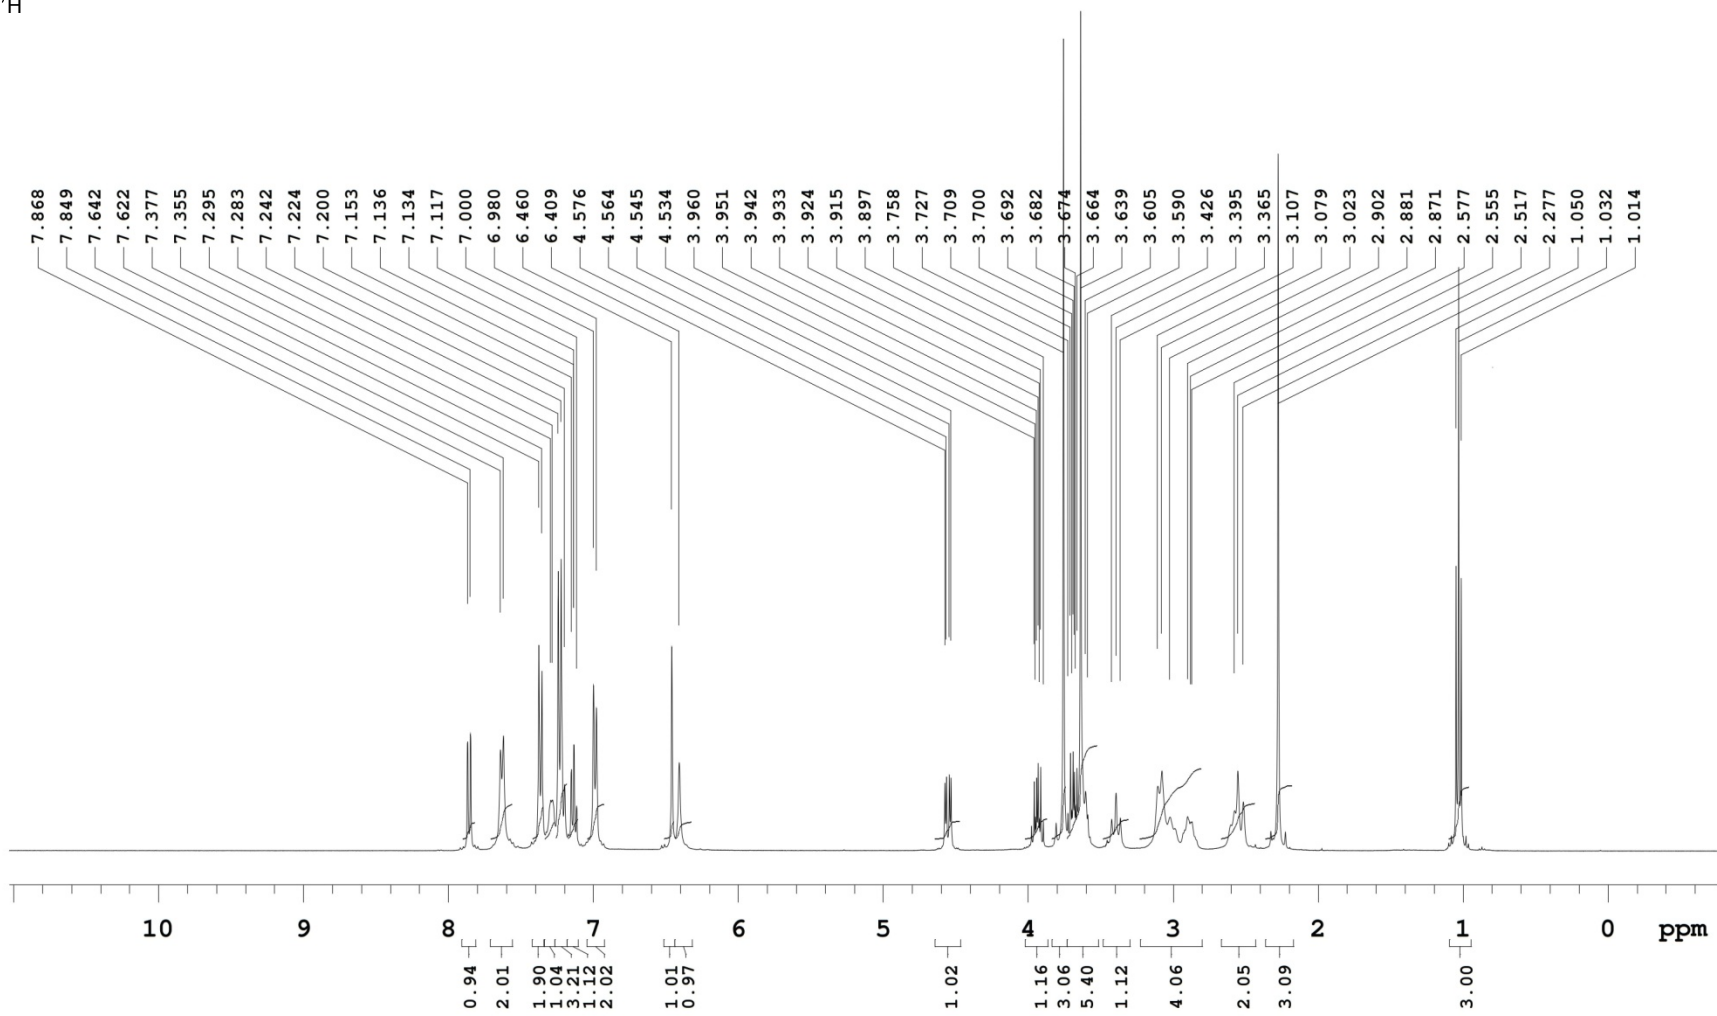

<sup>13</sup>C NMR of **3o** in CDCl<sub>3</sub>

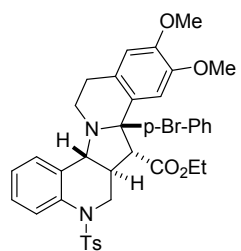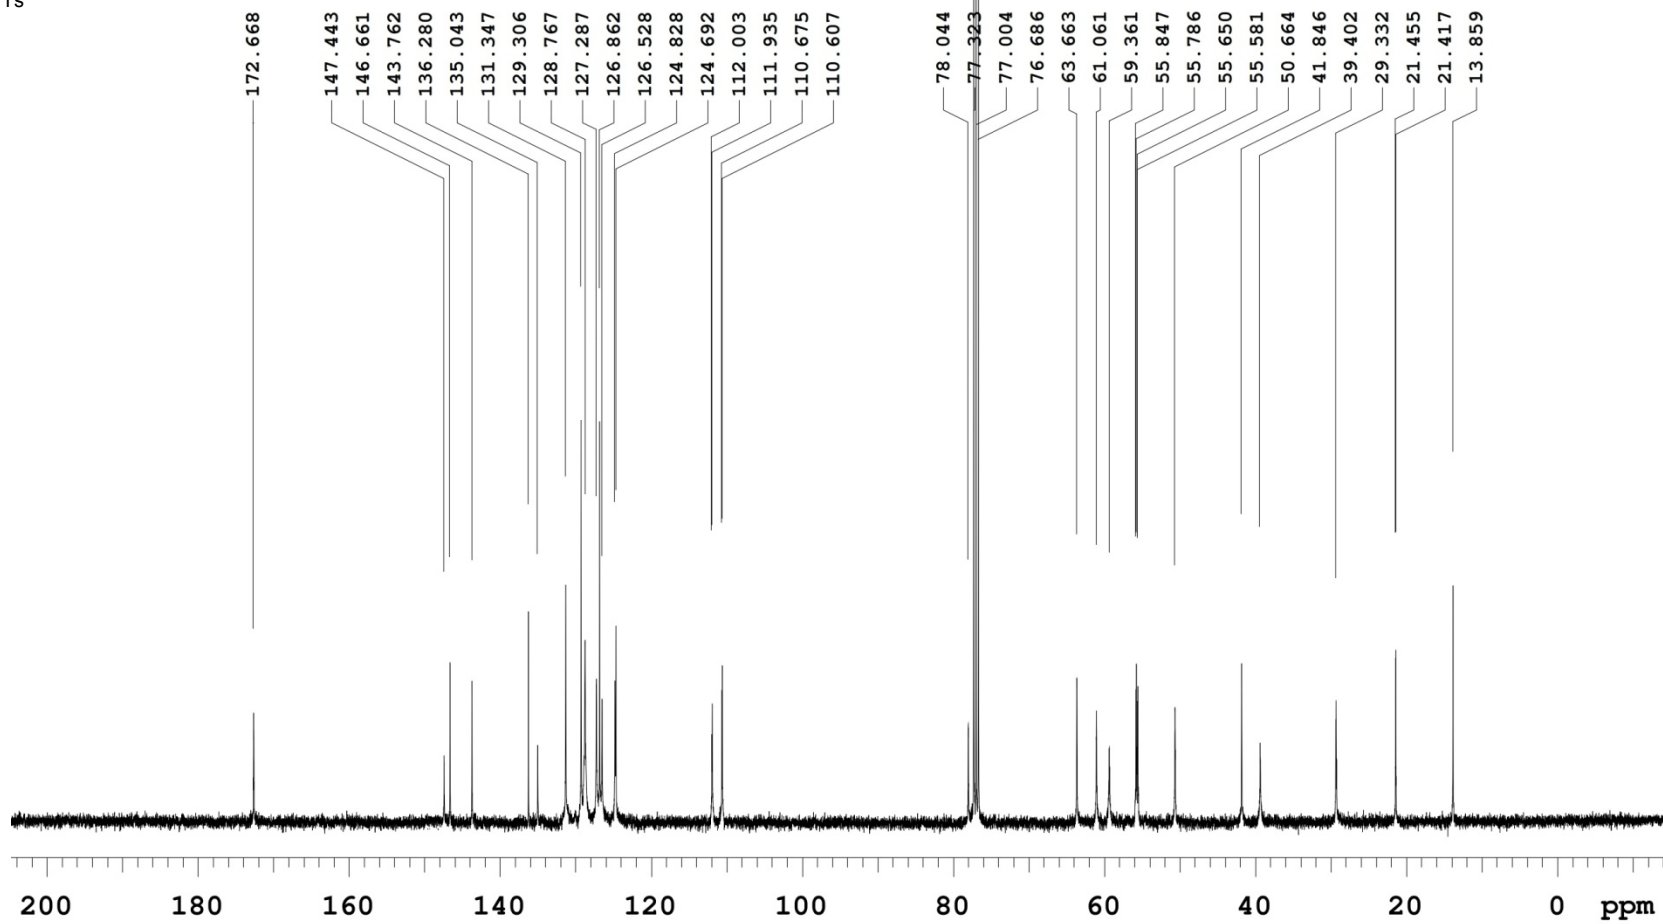



<sup>1</sup>H NMR of 3p in CDCl<sub>3</sub>

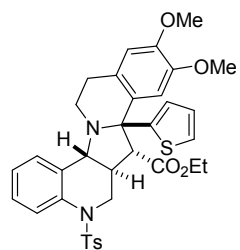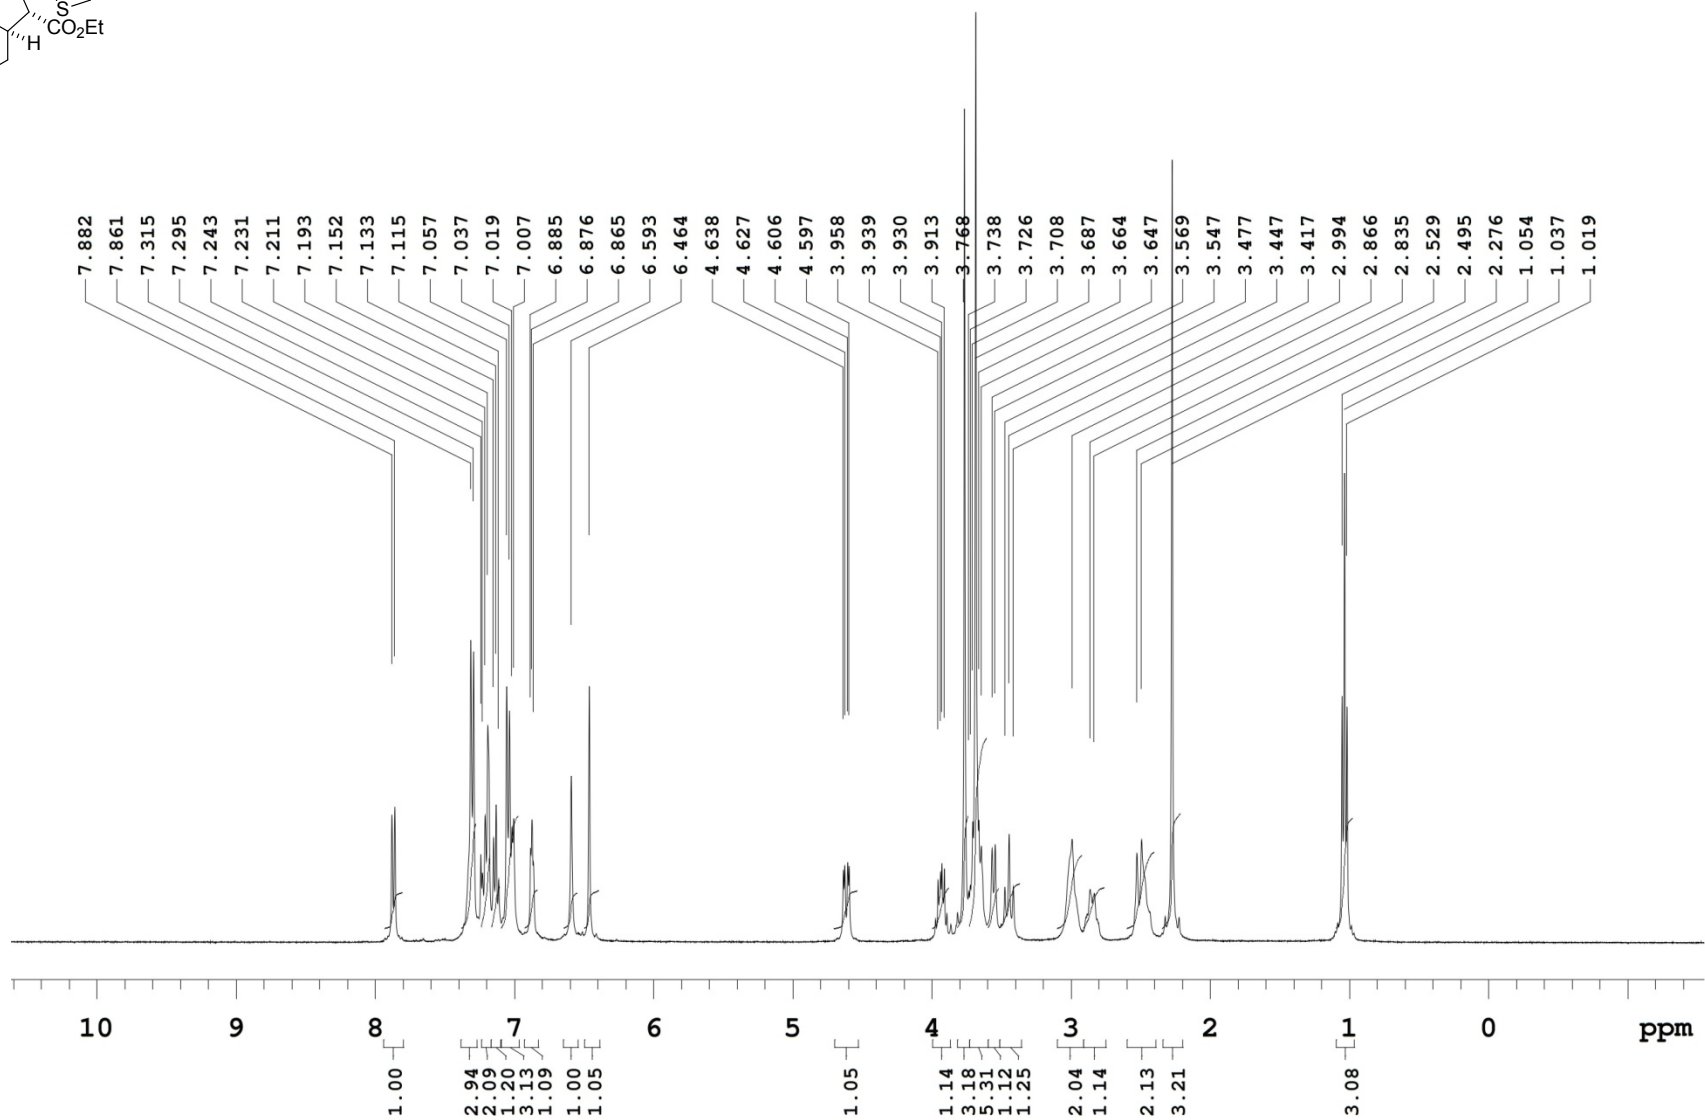

<sup>13</sup>C NMR of **3p** in CDCl<sub>3</sub>

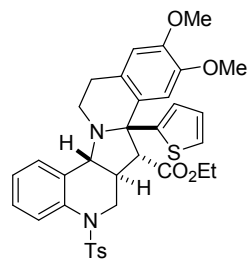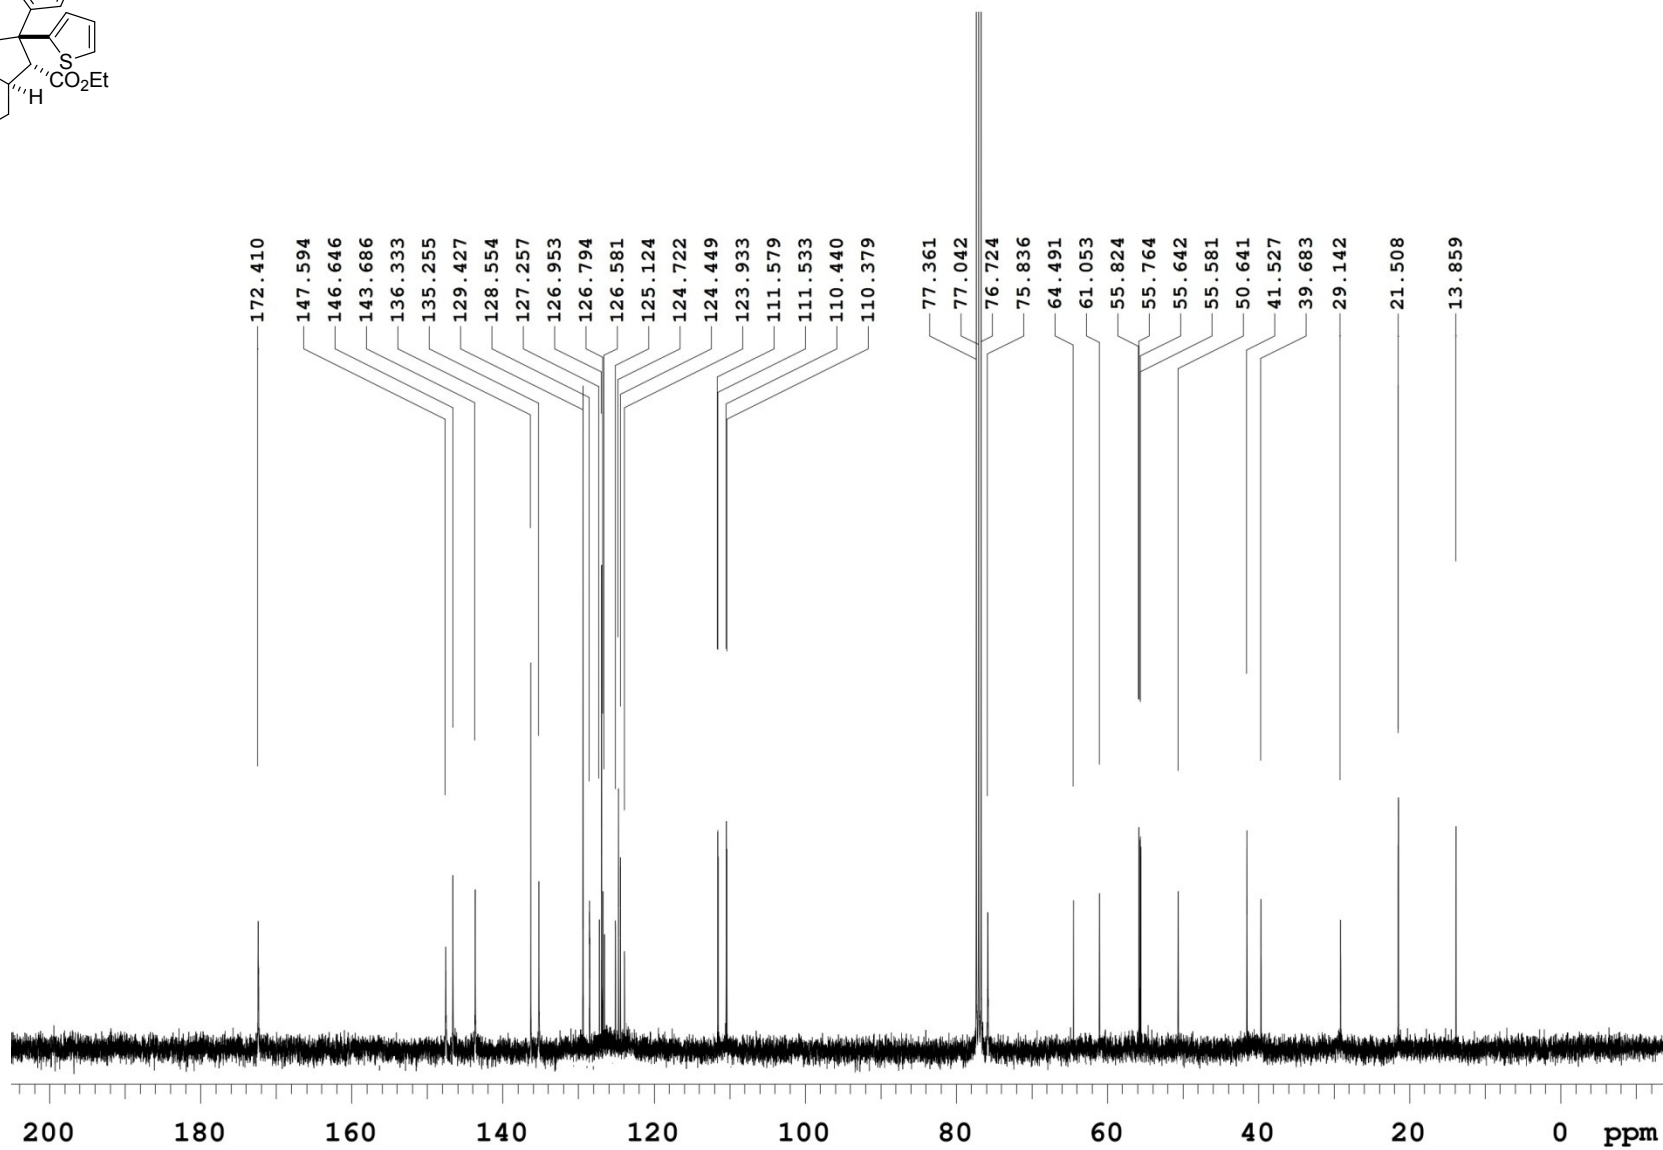

ORTEP Diagram Of 3p

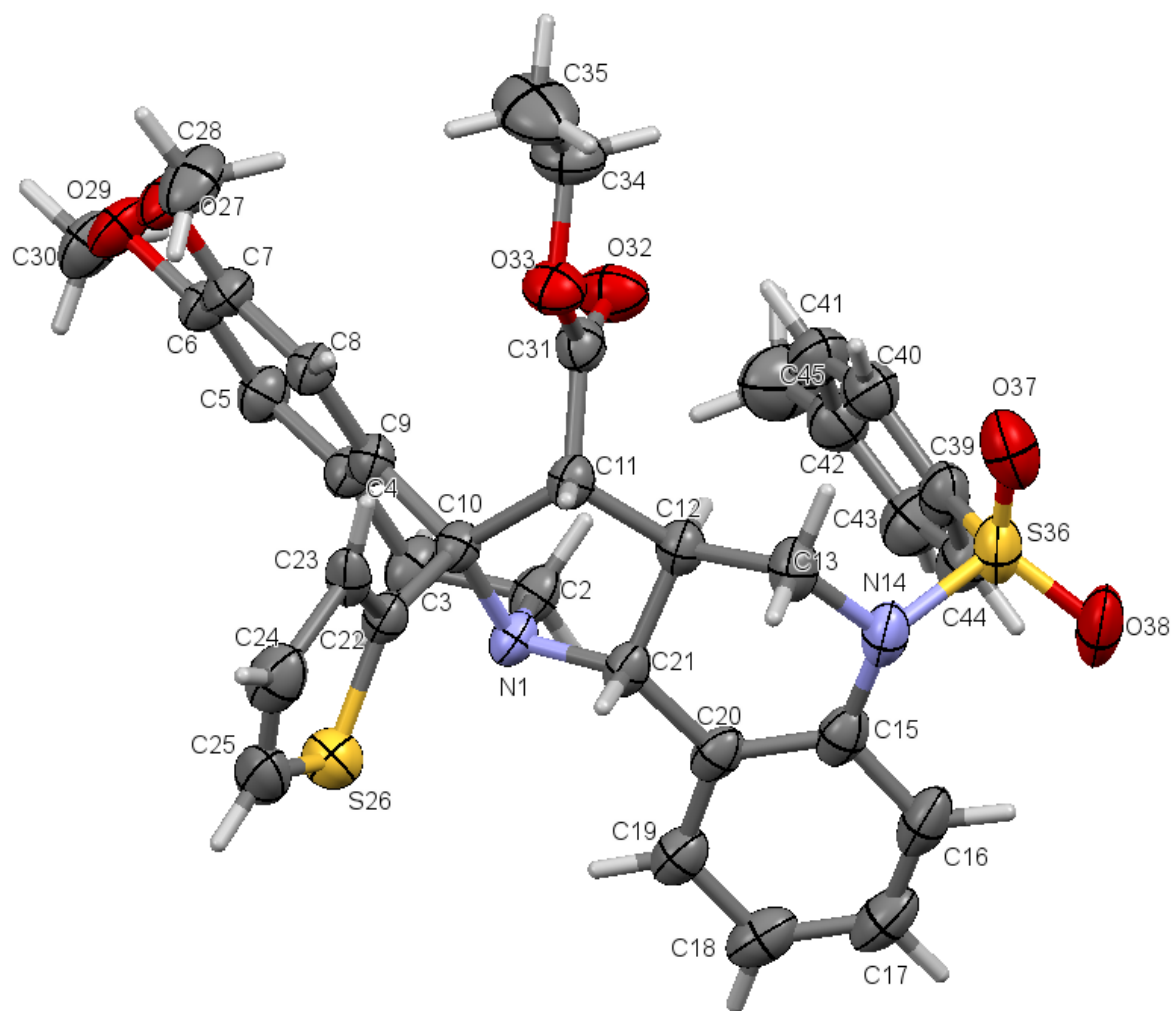

<sup>1</sup>H NMR of **4a** in DMSO-d<sub>6</sub>

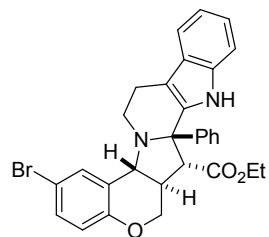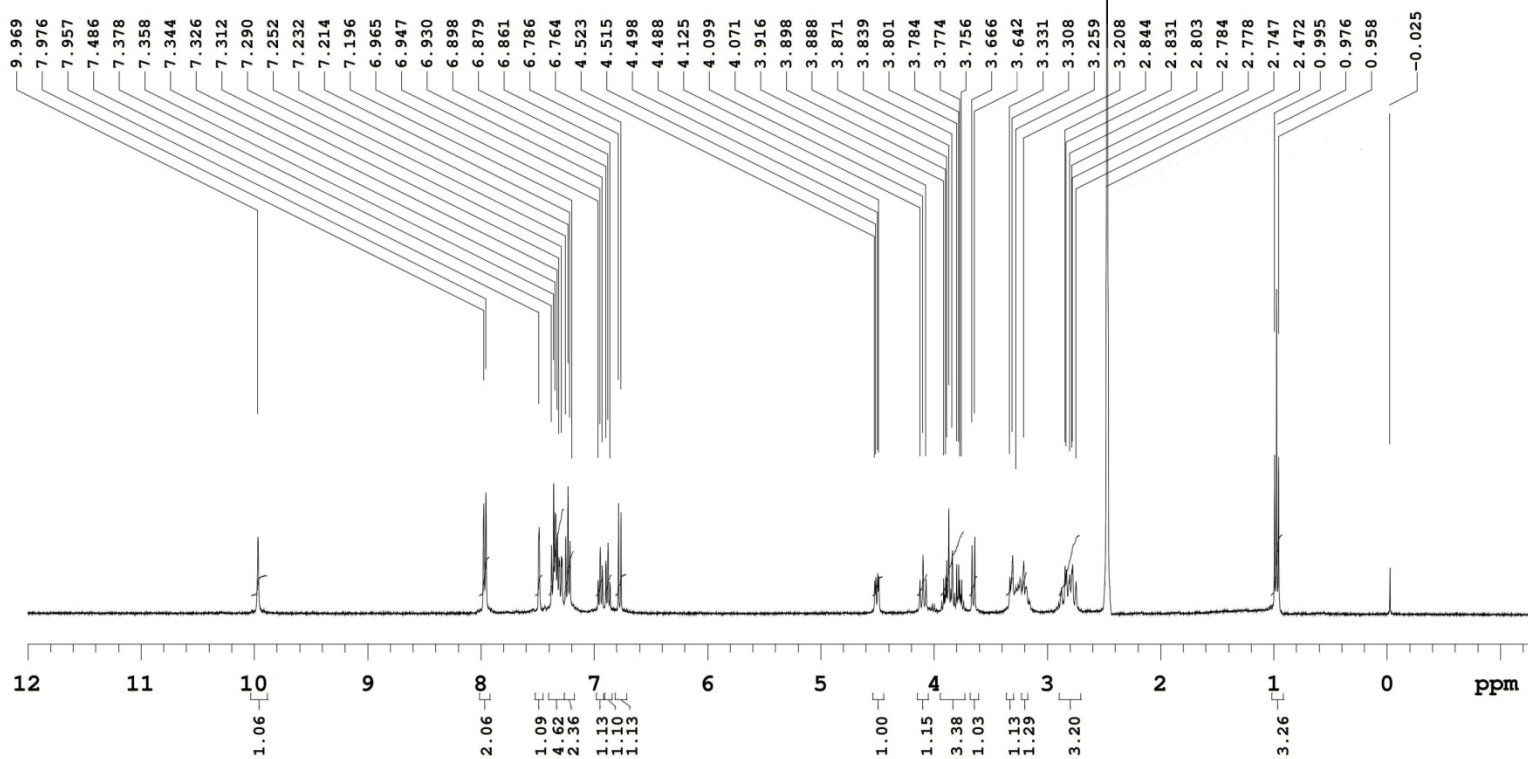

<sup>13</sup>C NMR of **4a** in DMSO-d<sub>6</sub>

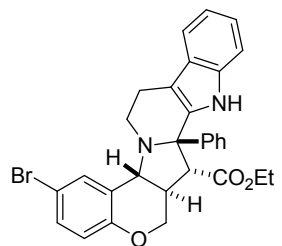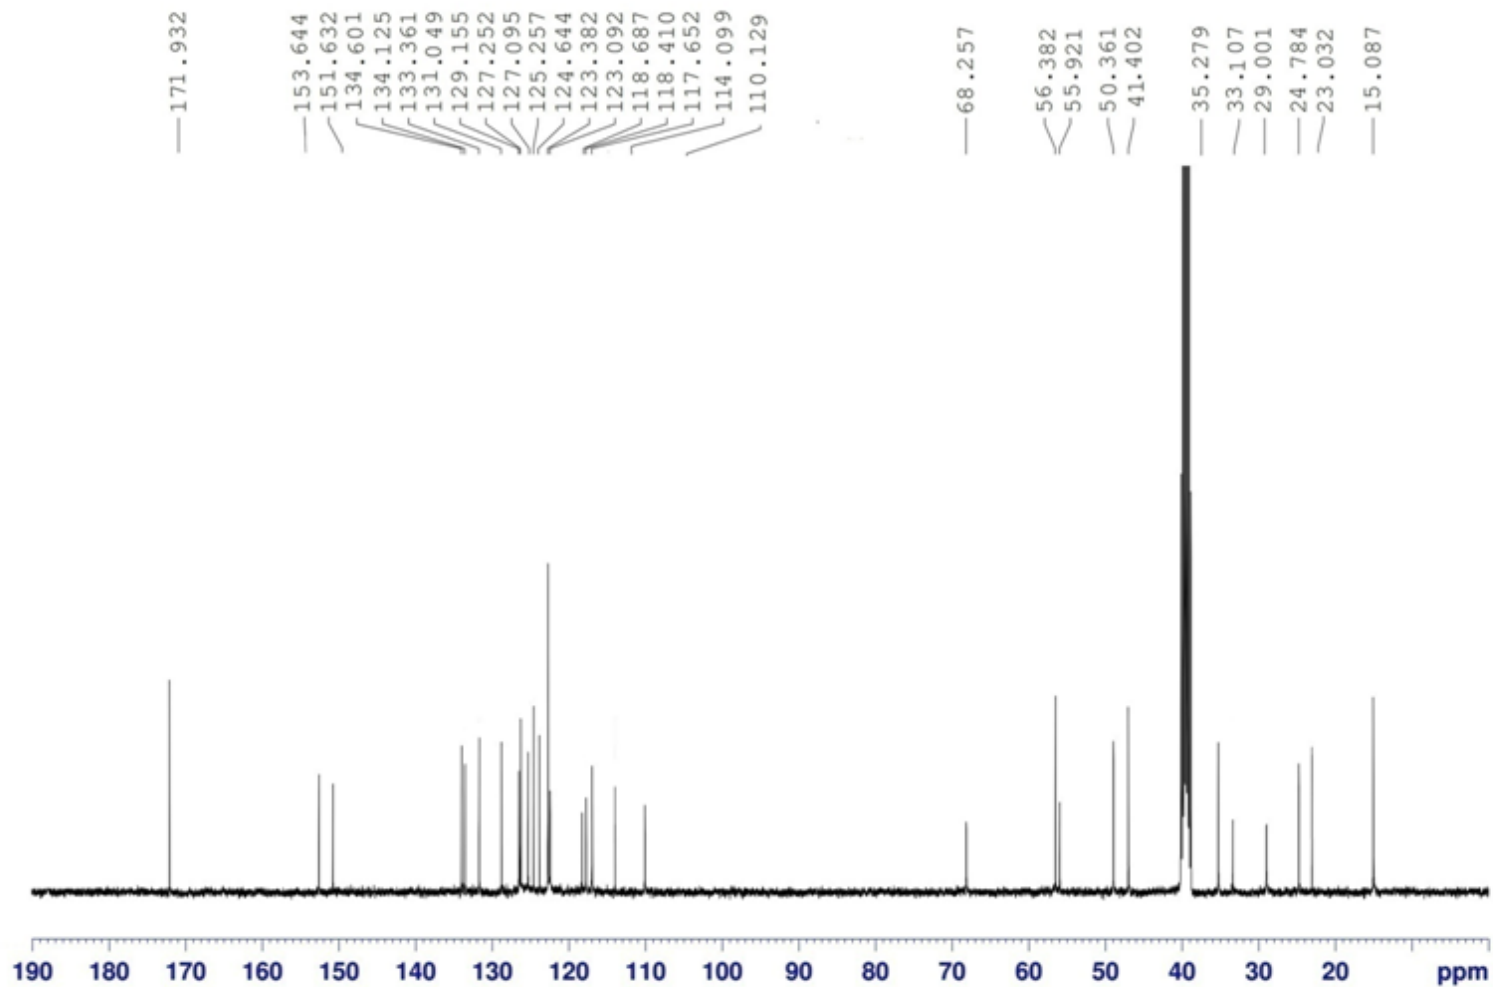

<sup>1</sup>H NMR of **4b** in DMSO-d<sub>6</sub>

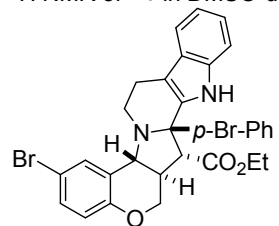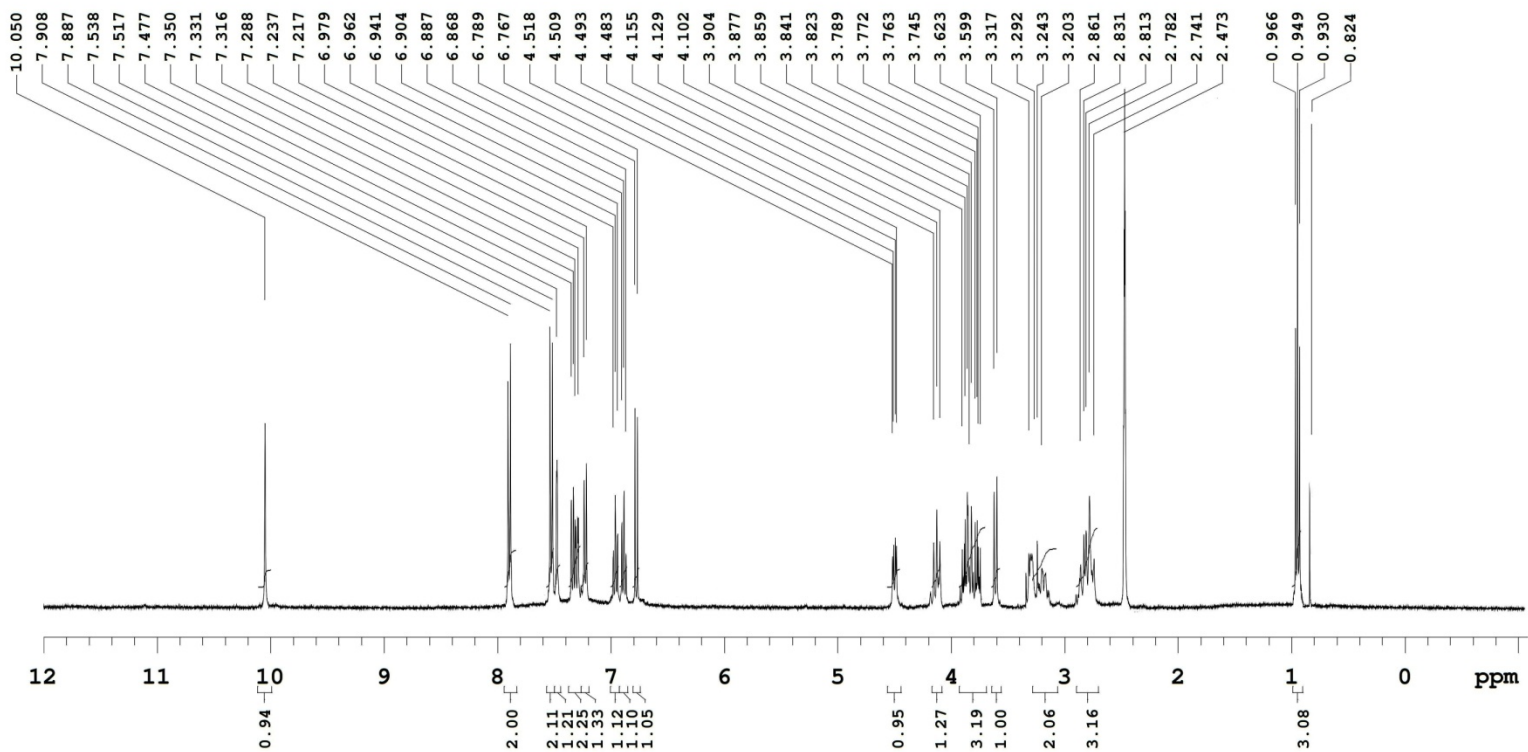

<sup>13</sup>C NMR of **4b** in CDCl<sub>3</sub>

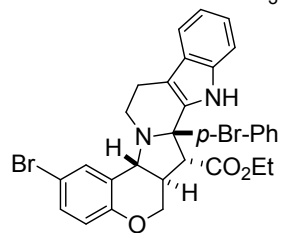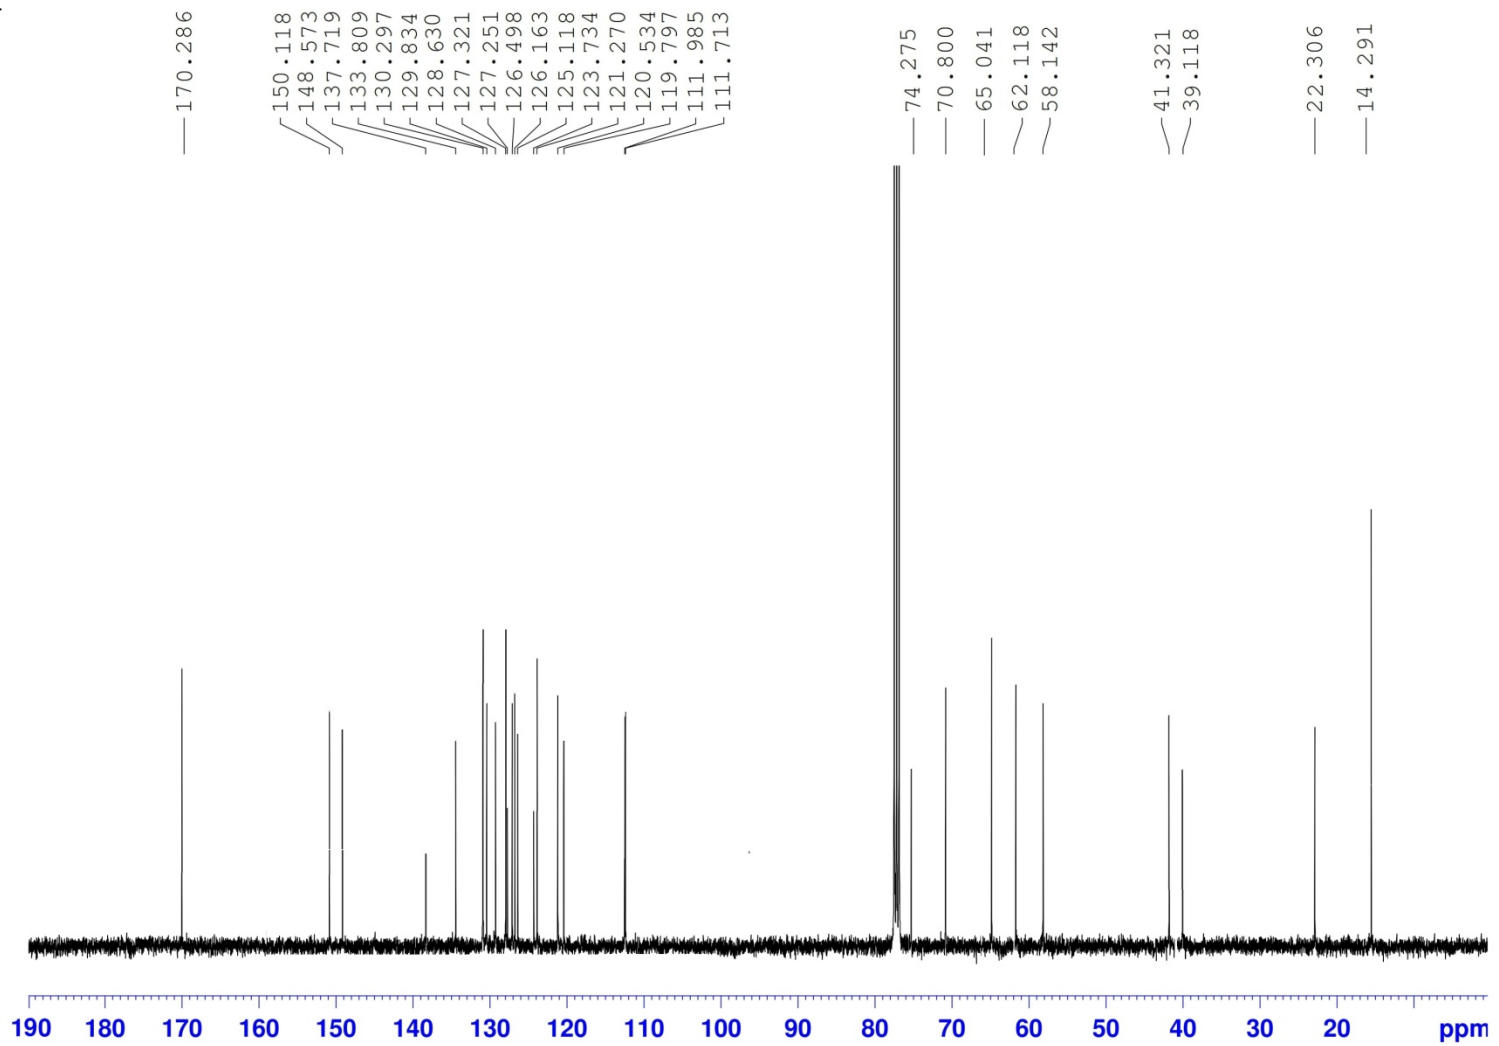

$^1\text{H}$  NMR of **4c** in  $\text{DMSO-d}_6$

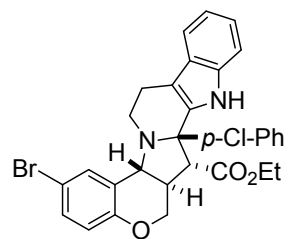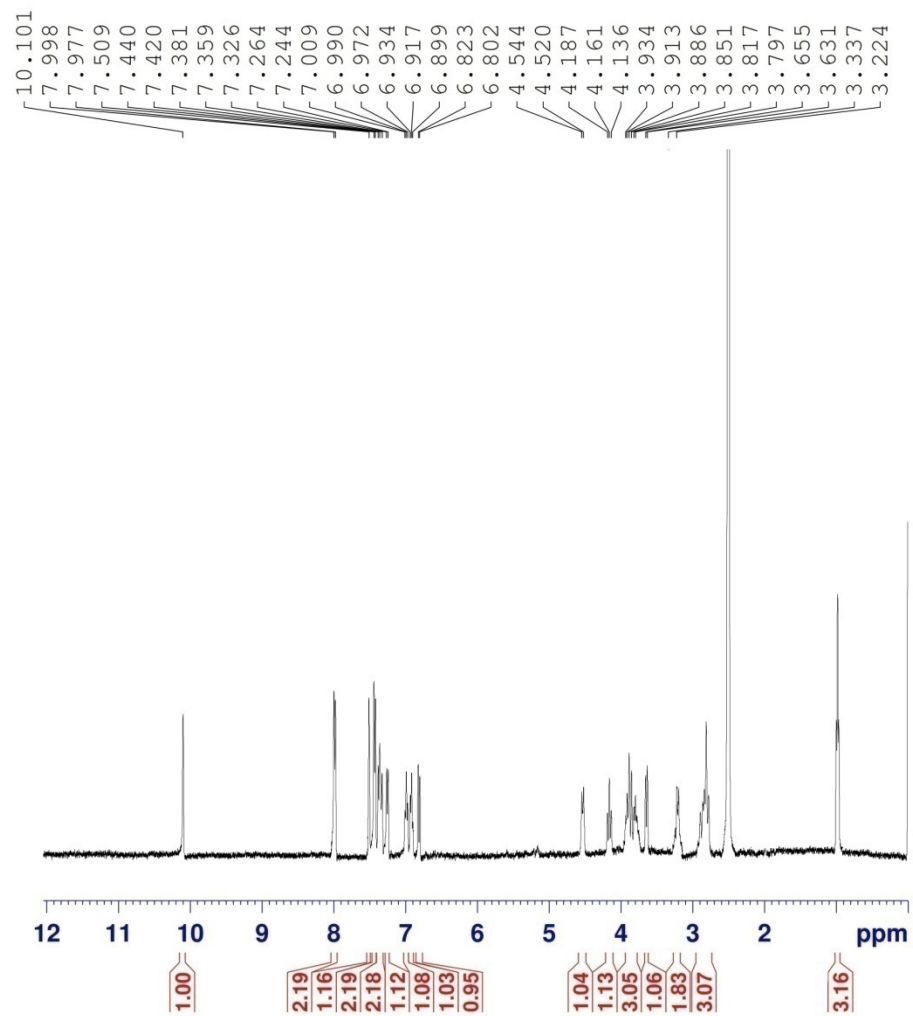



$^{13}\text{C}$  NMR of **4c** in  $\text{DMSO-d}_6$

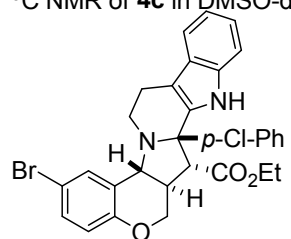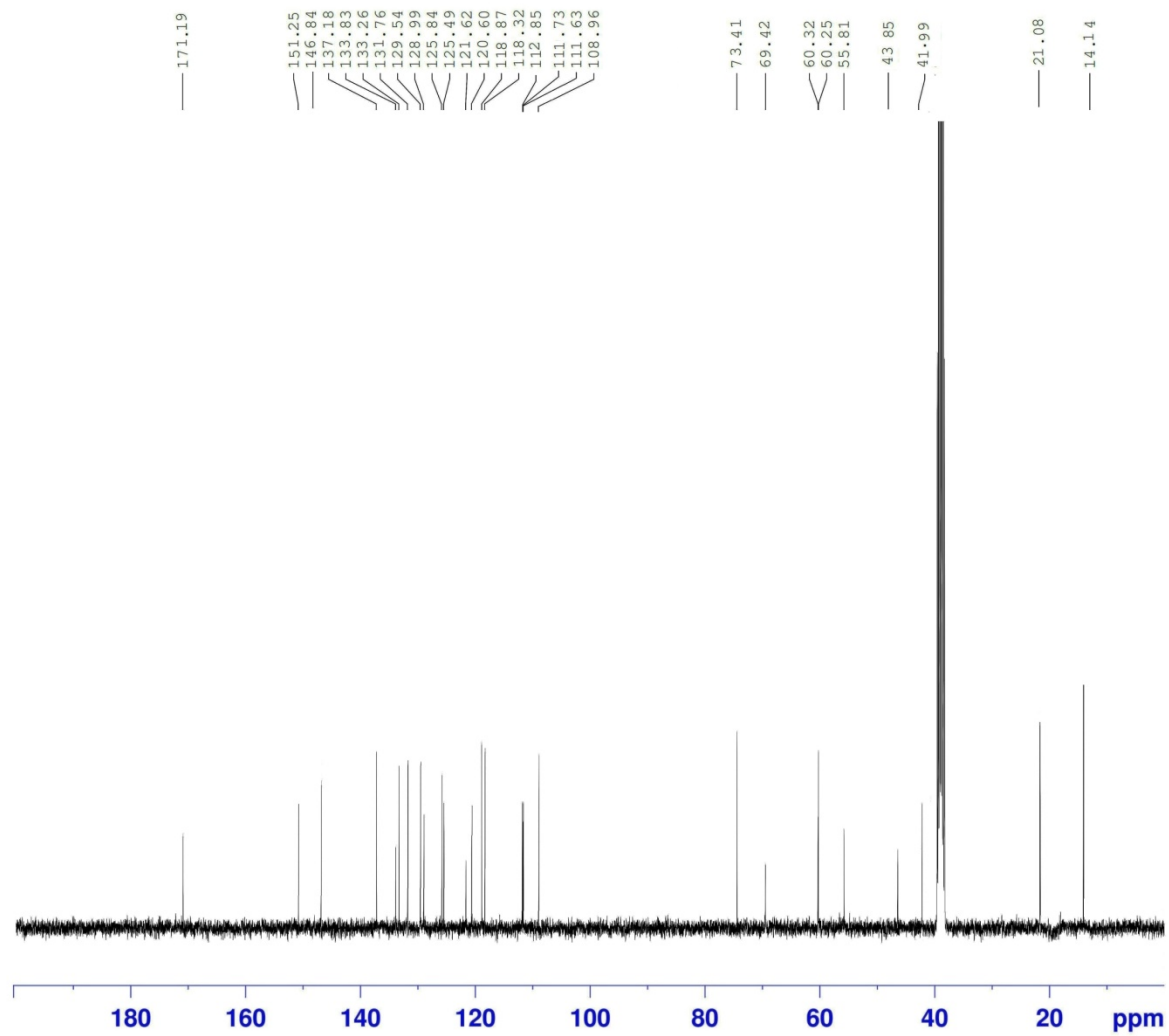

ORTEP diagram of **4c**

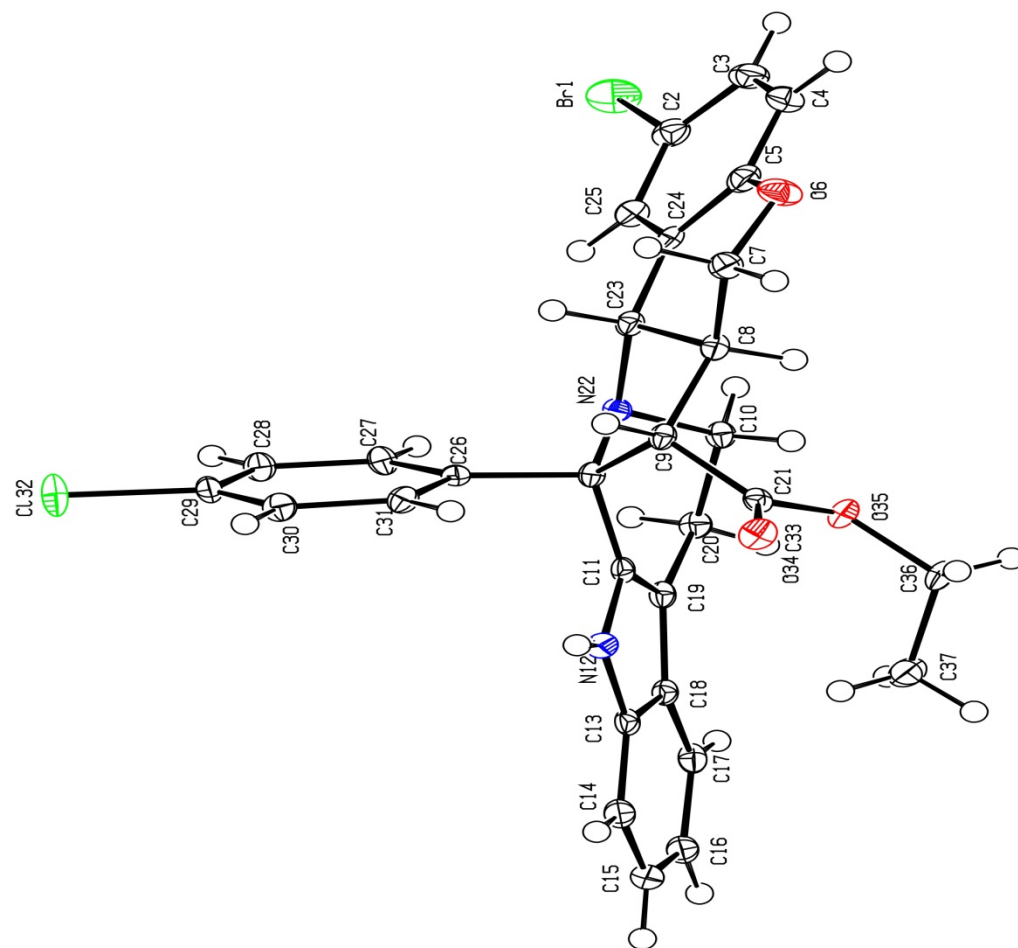

<sup>1</sup>H NMR of **4d** in DMSO-d<sub>6</sub>

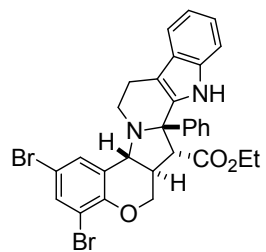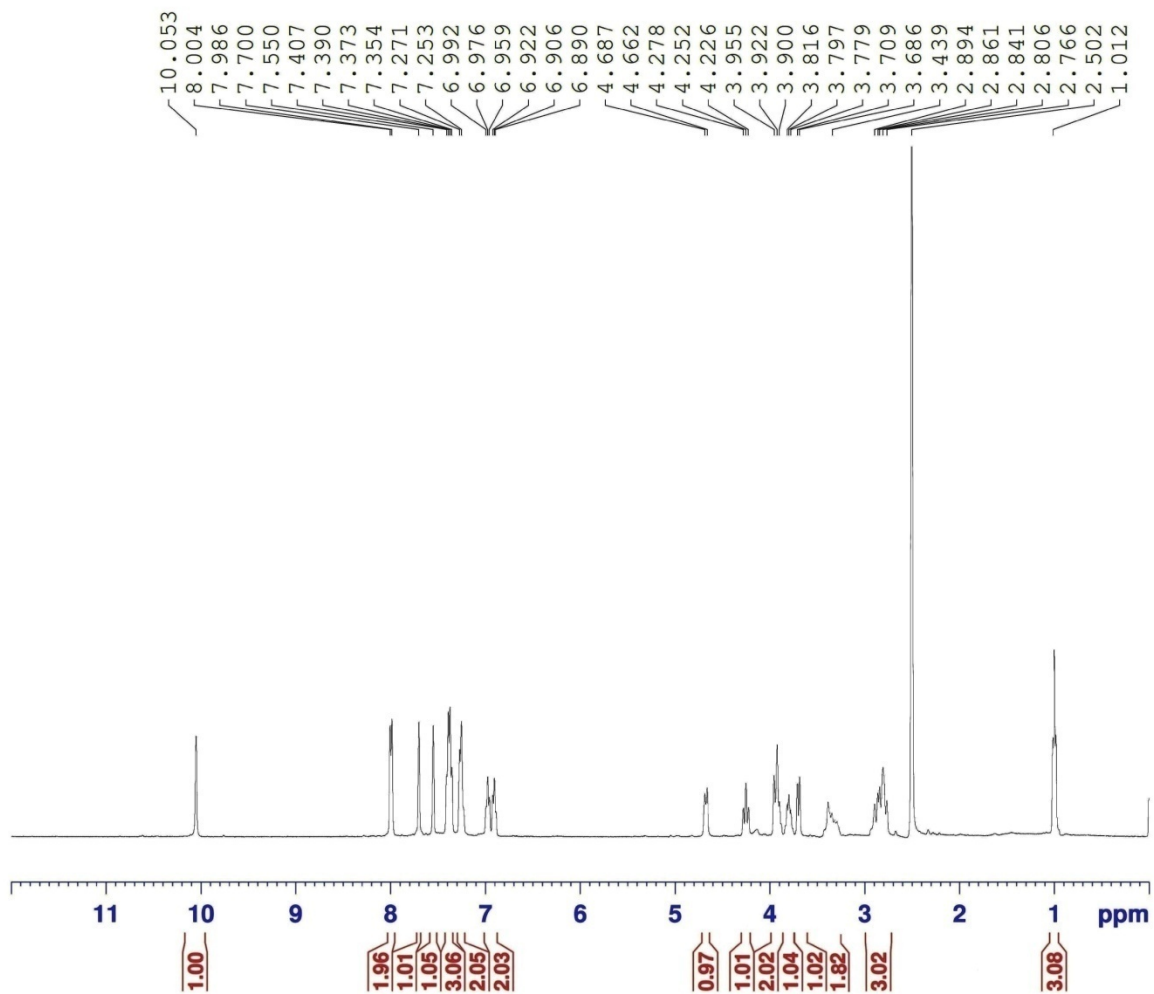

$^{13}\text{C}$  NMR of **4d** in DMSO- $d_6$

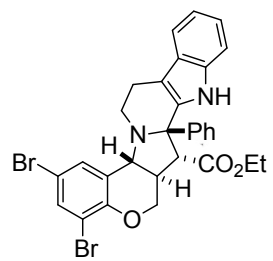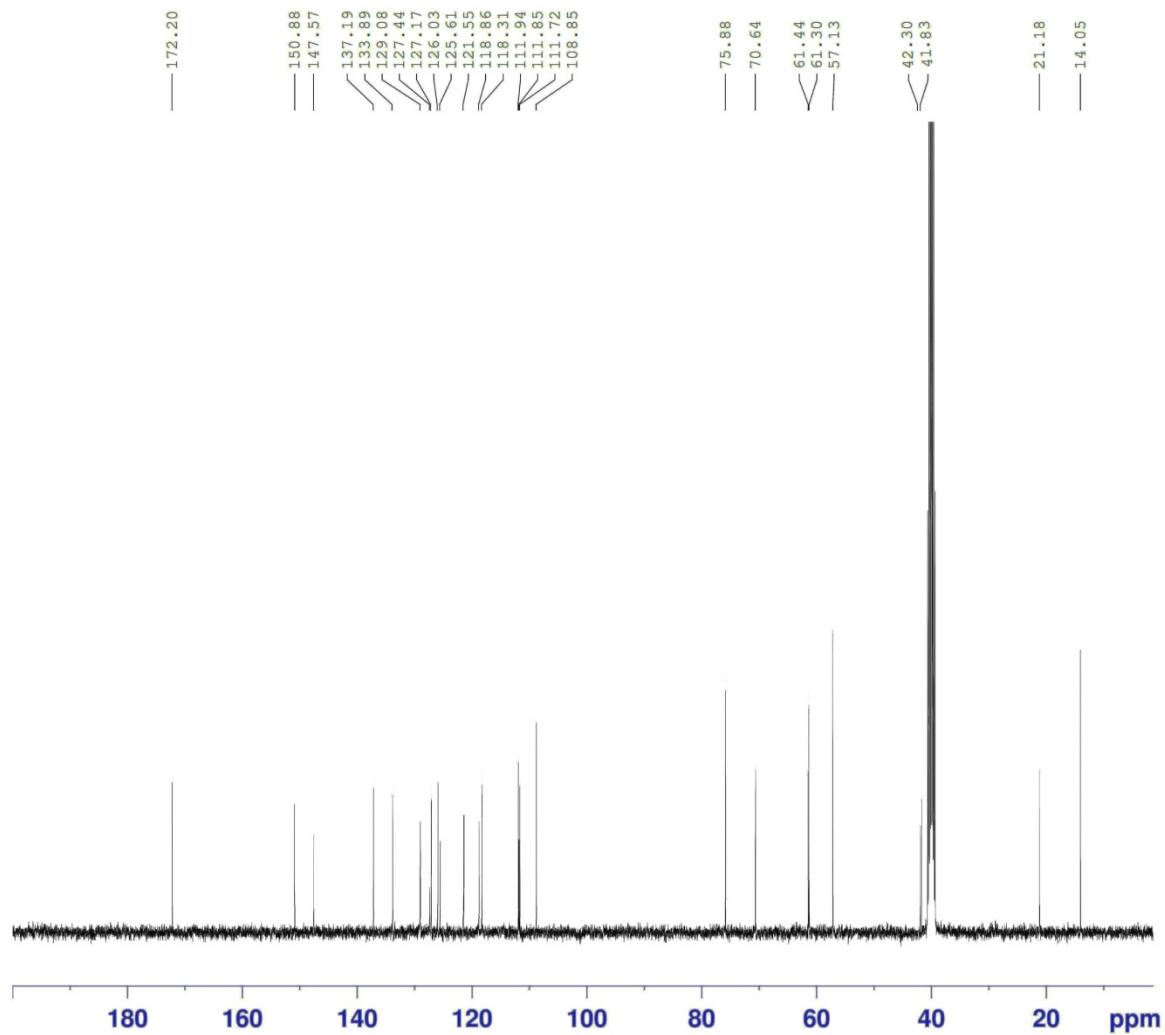

$^1\text{H}$  NMR of **4e** in  $\text{DMSO-d}_6$

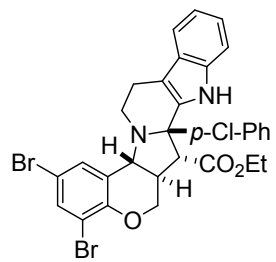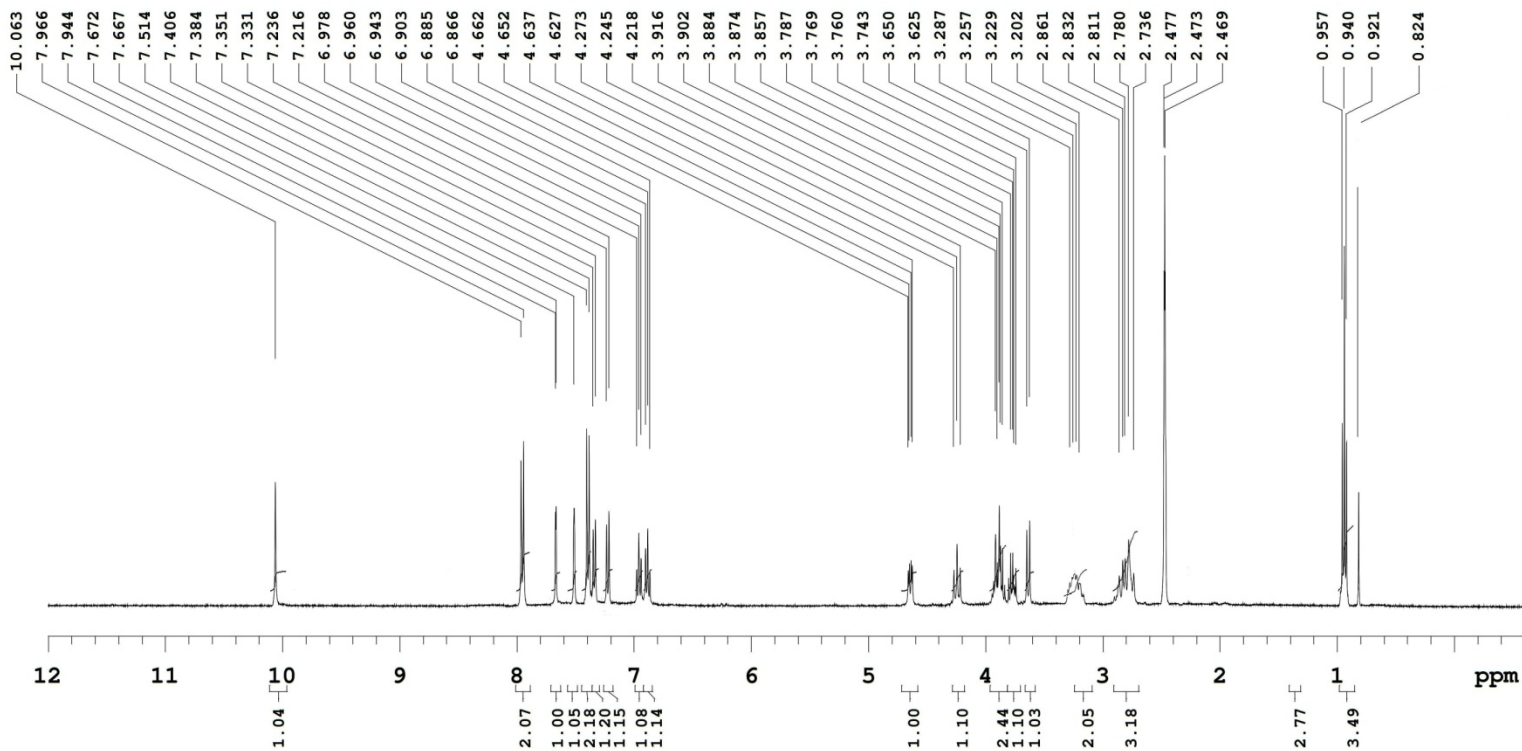

<sup>13</sup>C NMR of **4e** in DMSO-d<sub>6</sub>

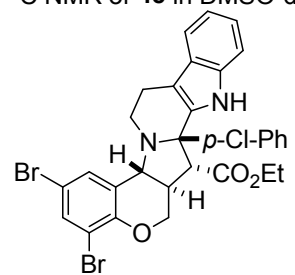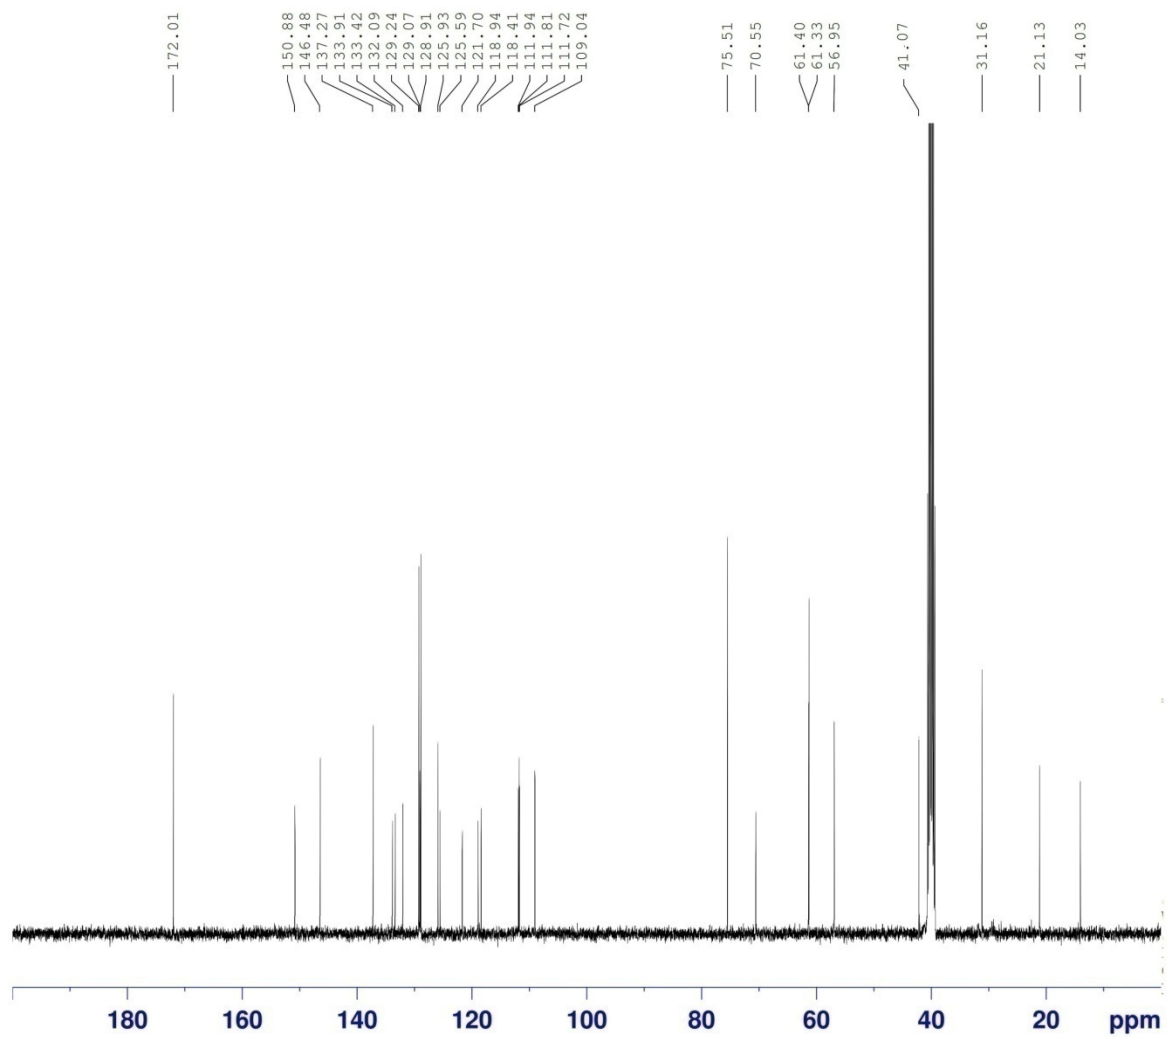

<sup>1</sup>H NMR of **4f** in DMSO-d<sub>6</sub>

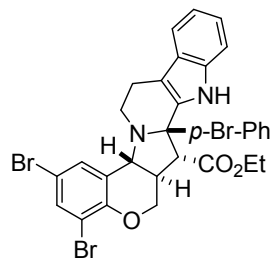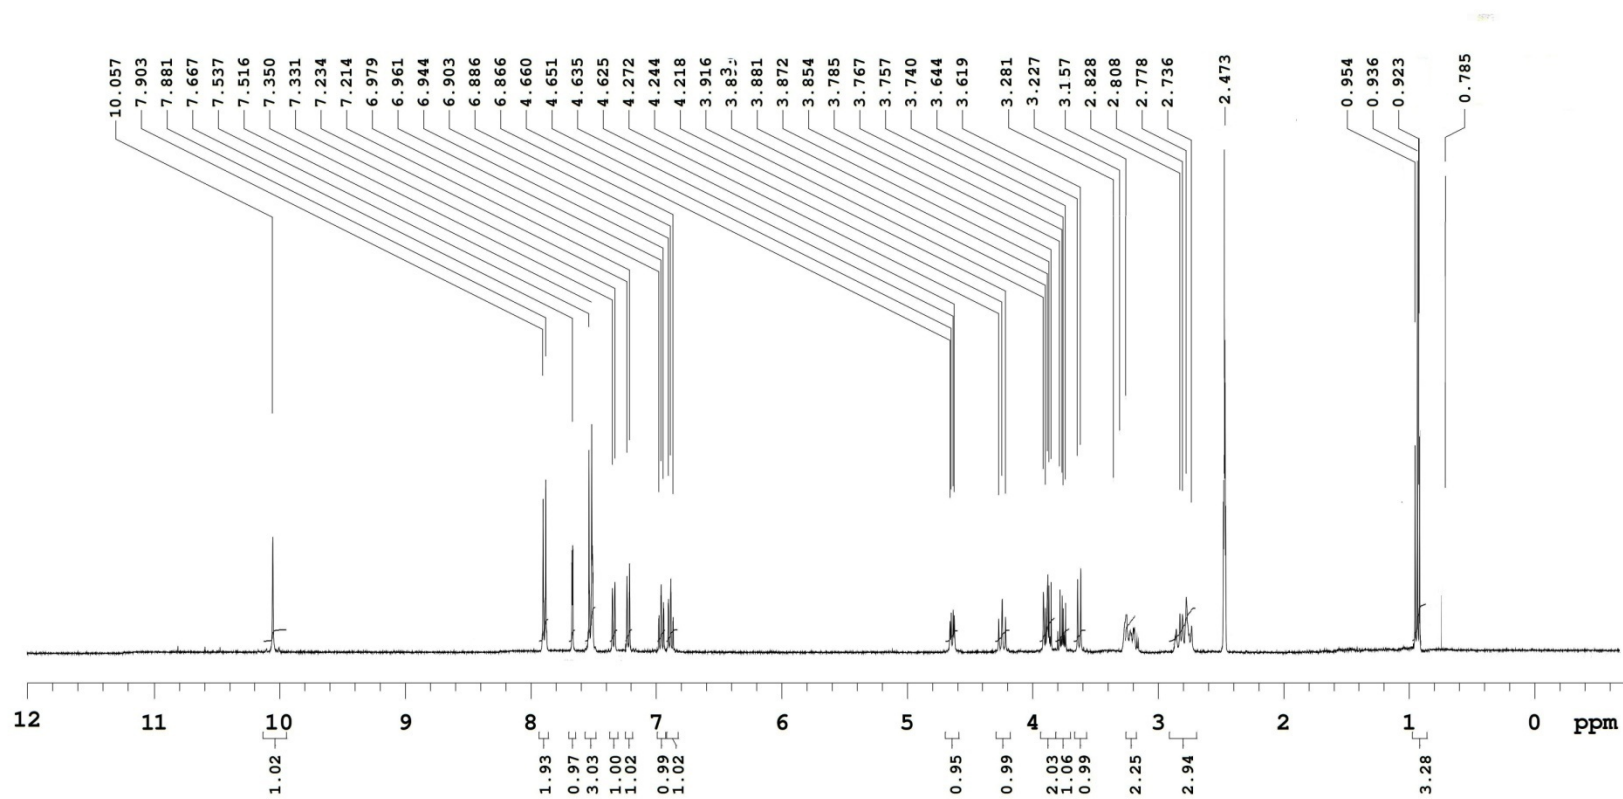

$^{13}\text{C}$  NMR of **4f** in  $\text{DMSO-d}_6$

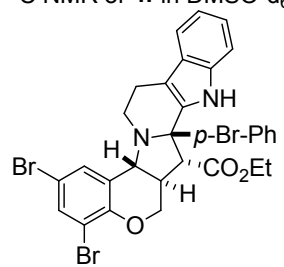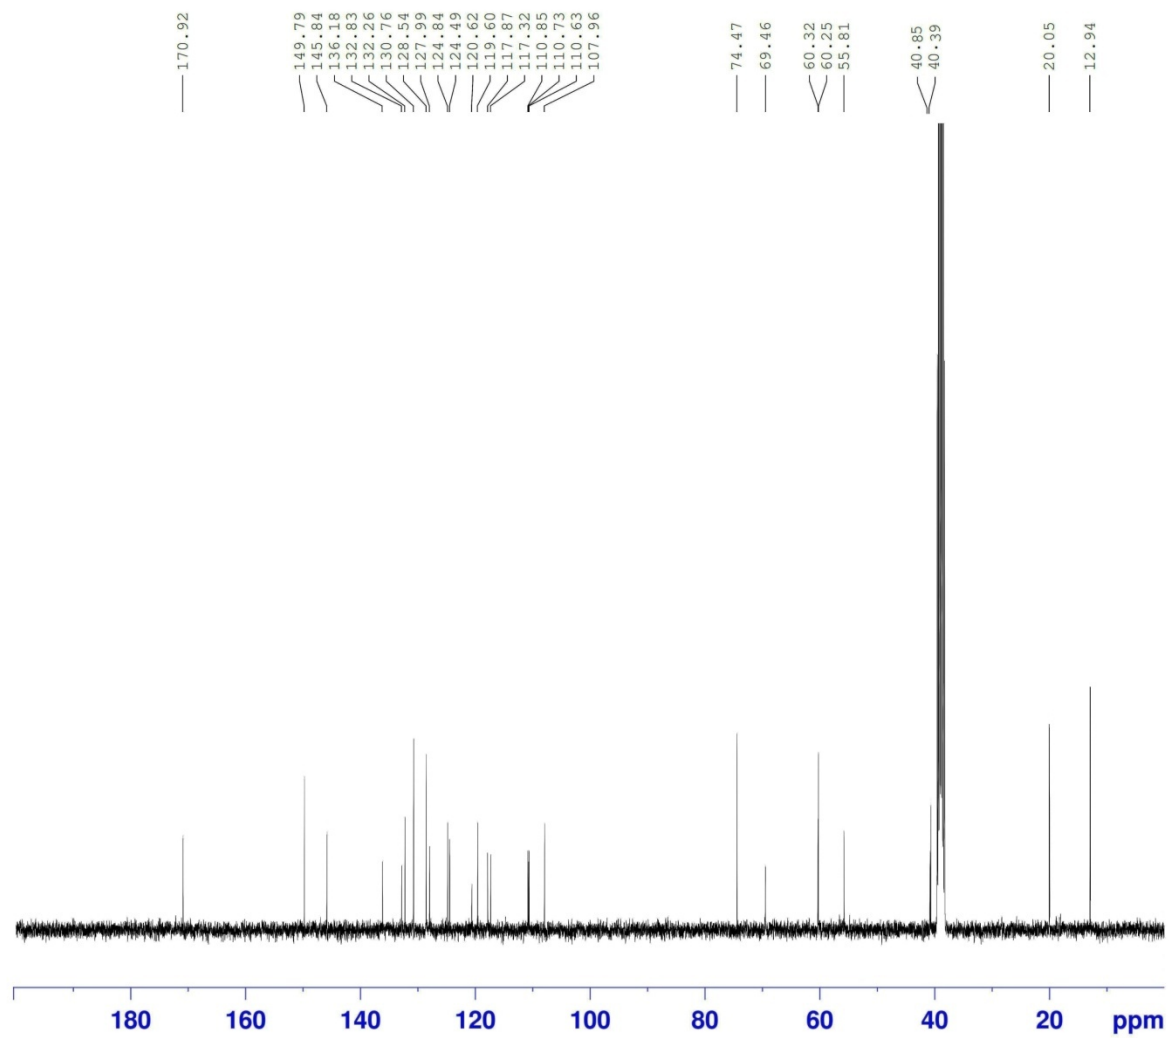



<sup>1</sup>H NMR of **4g** in DMSO-d<sub>6</sub>

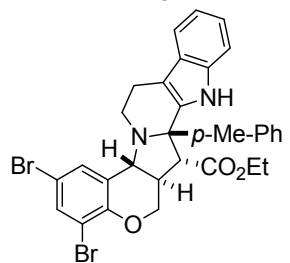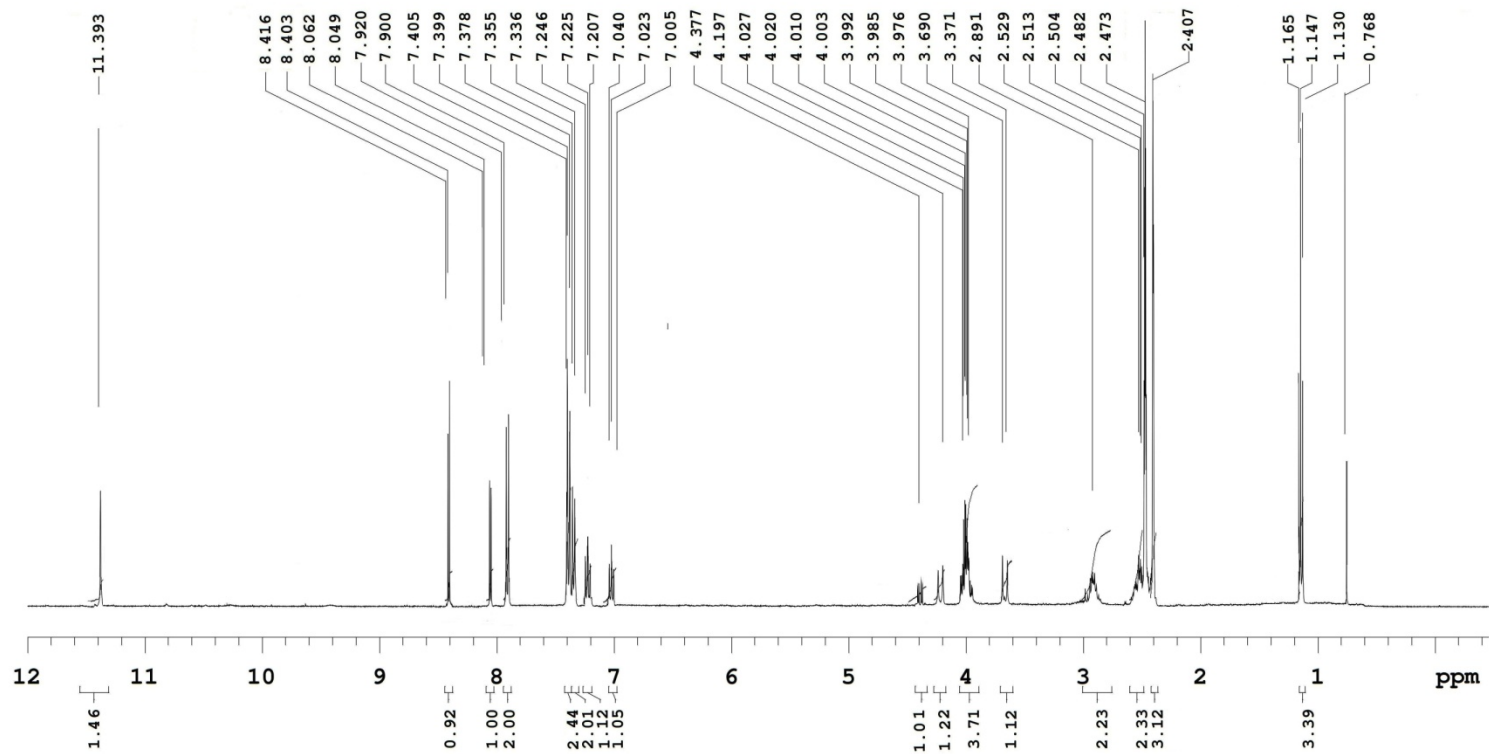

<sup>13</sup>C NMR of **4g** in DMSO-d<sub>6</sub>

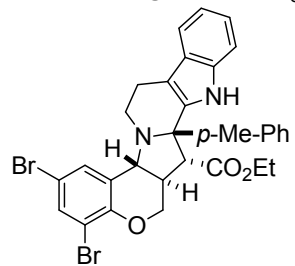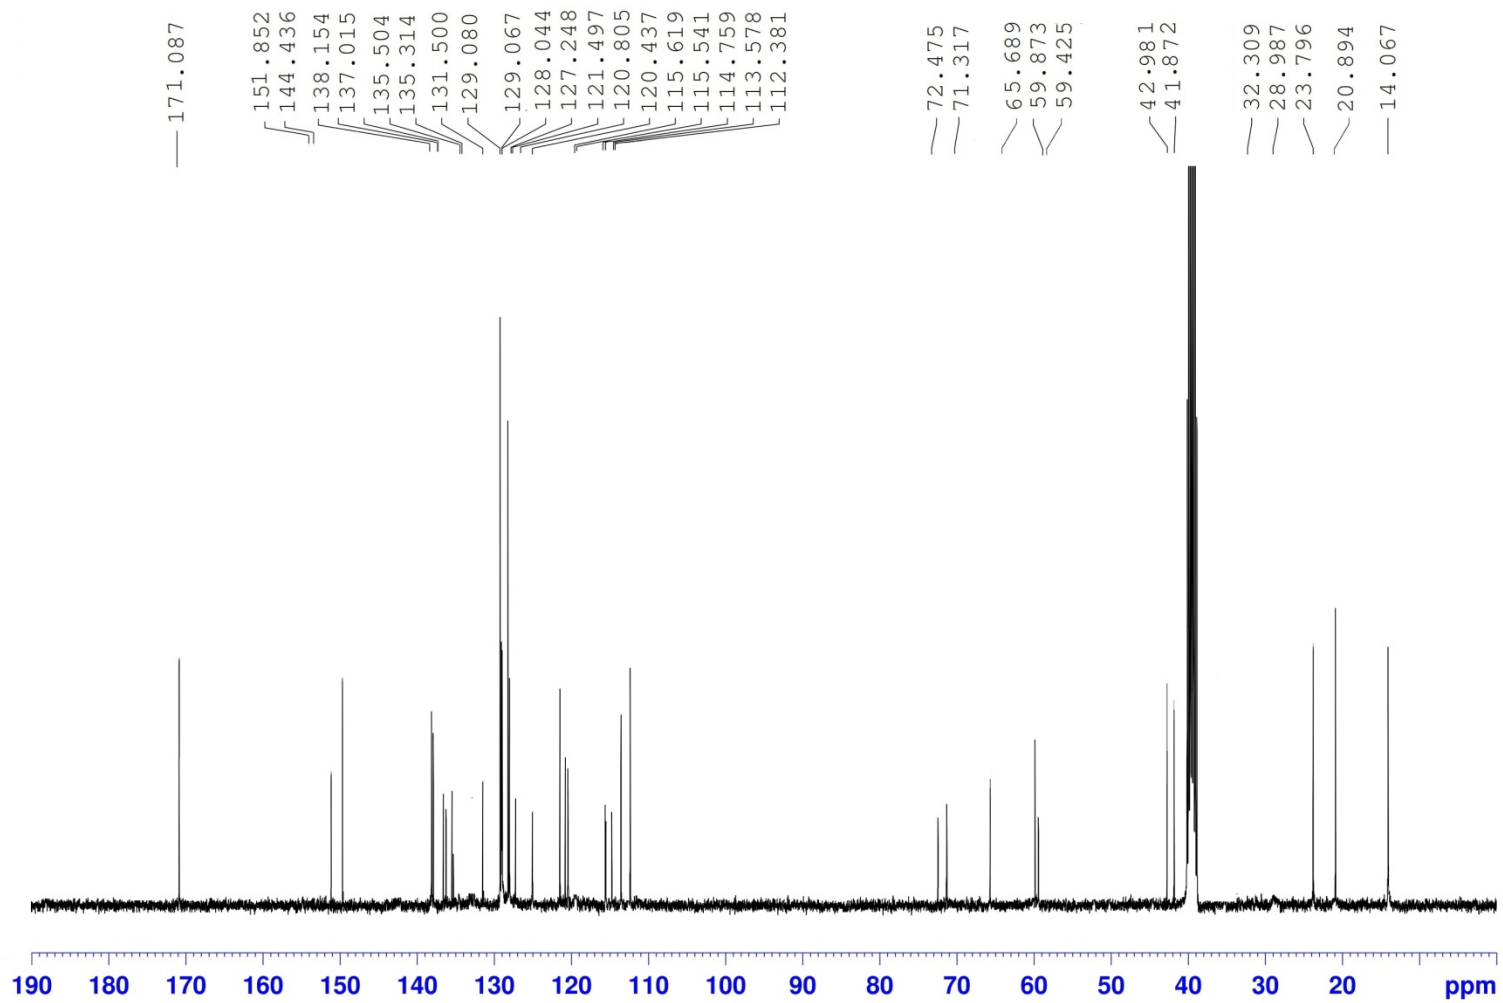

<sup>1</sup>H NMR of **4h** in DMSO-d<sub>6</sub>

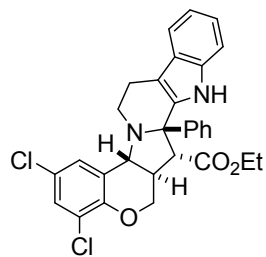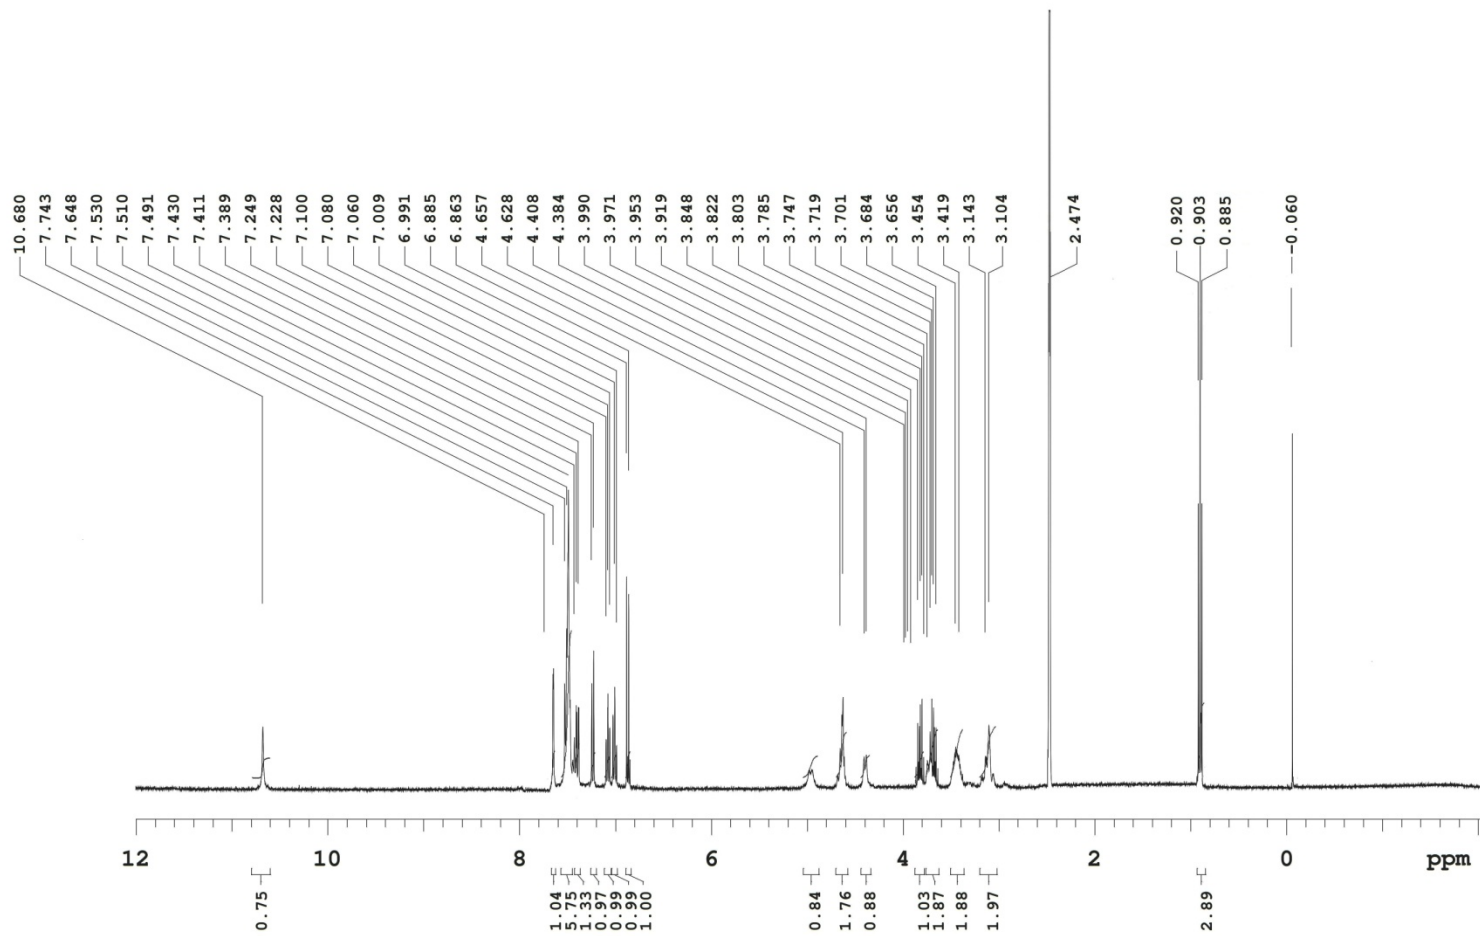

<sup>13</sup>C NMR of **4h** in CDCl<sub>3</sub>

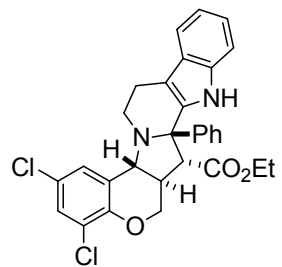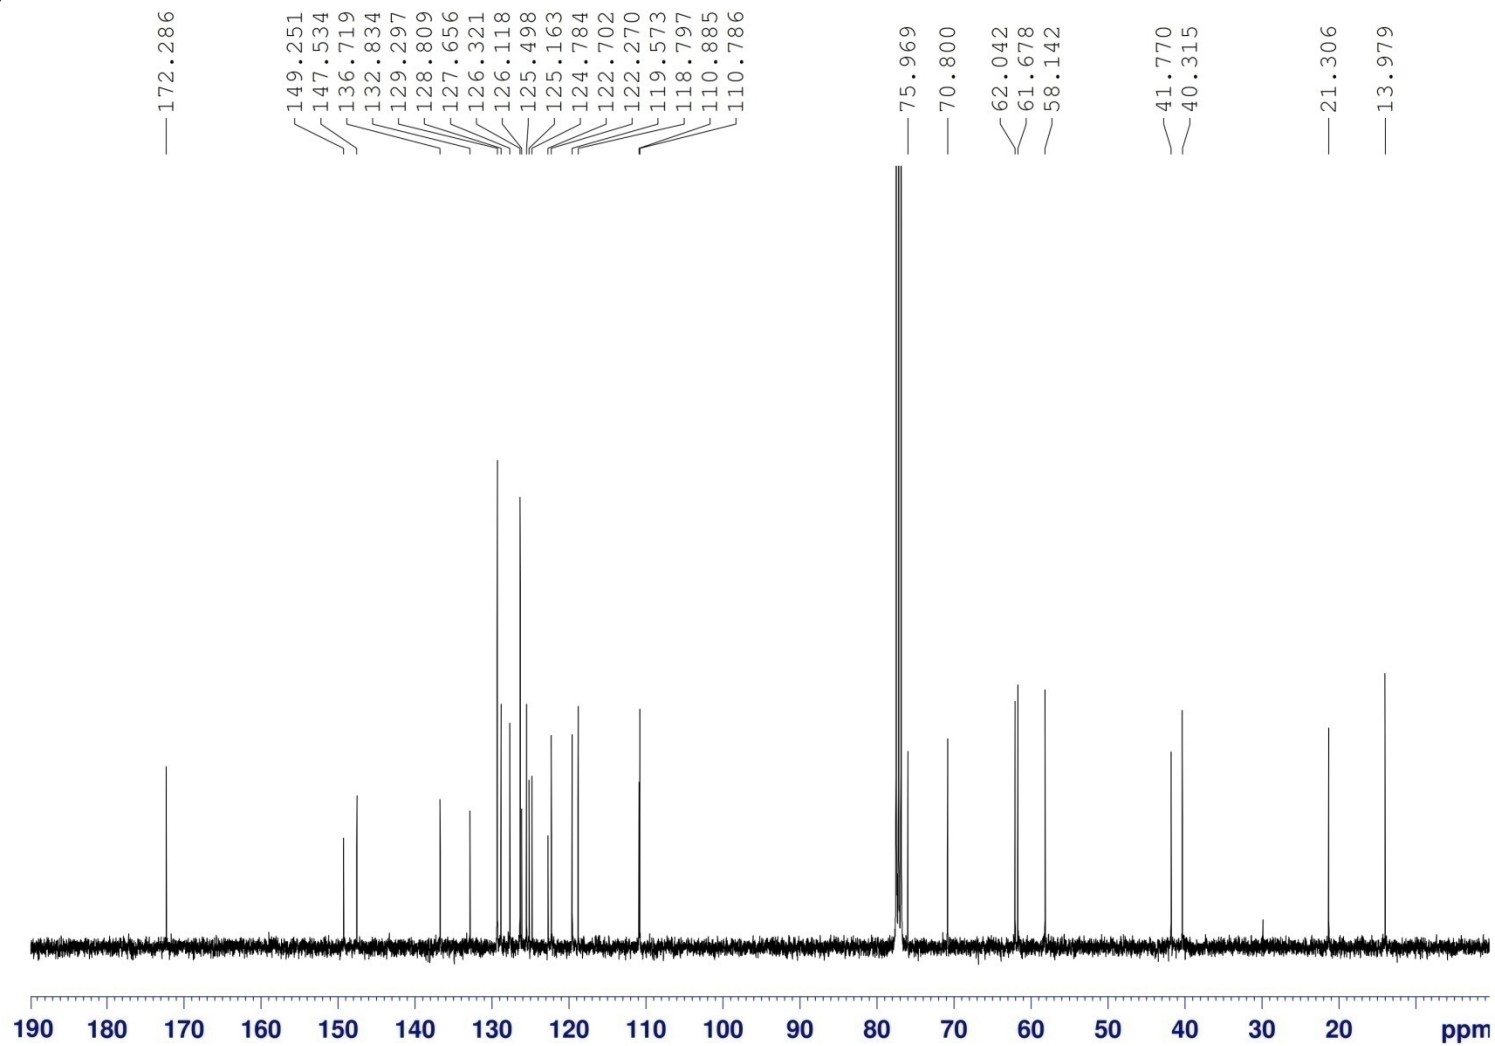

<sup>1</sup>H NMR of **4i** in DMSO-d<sub>6</sub>

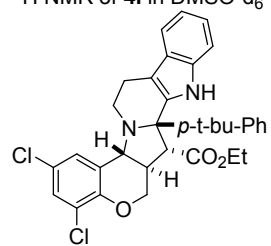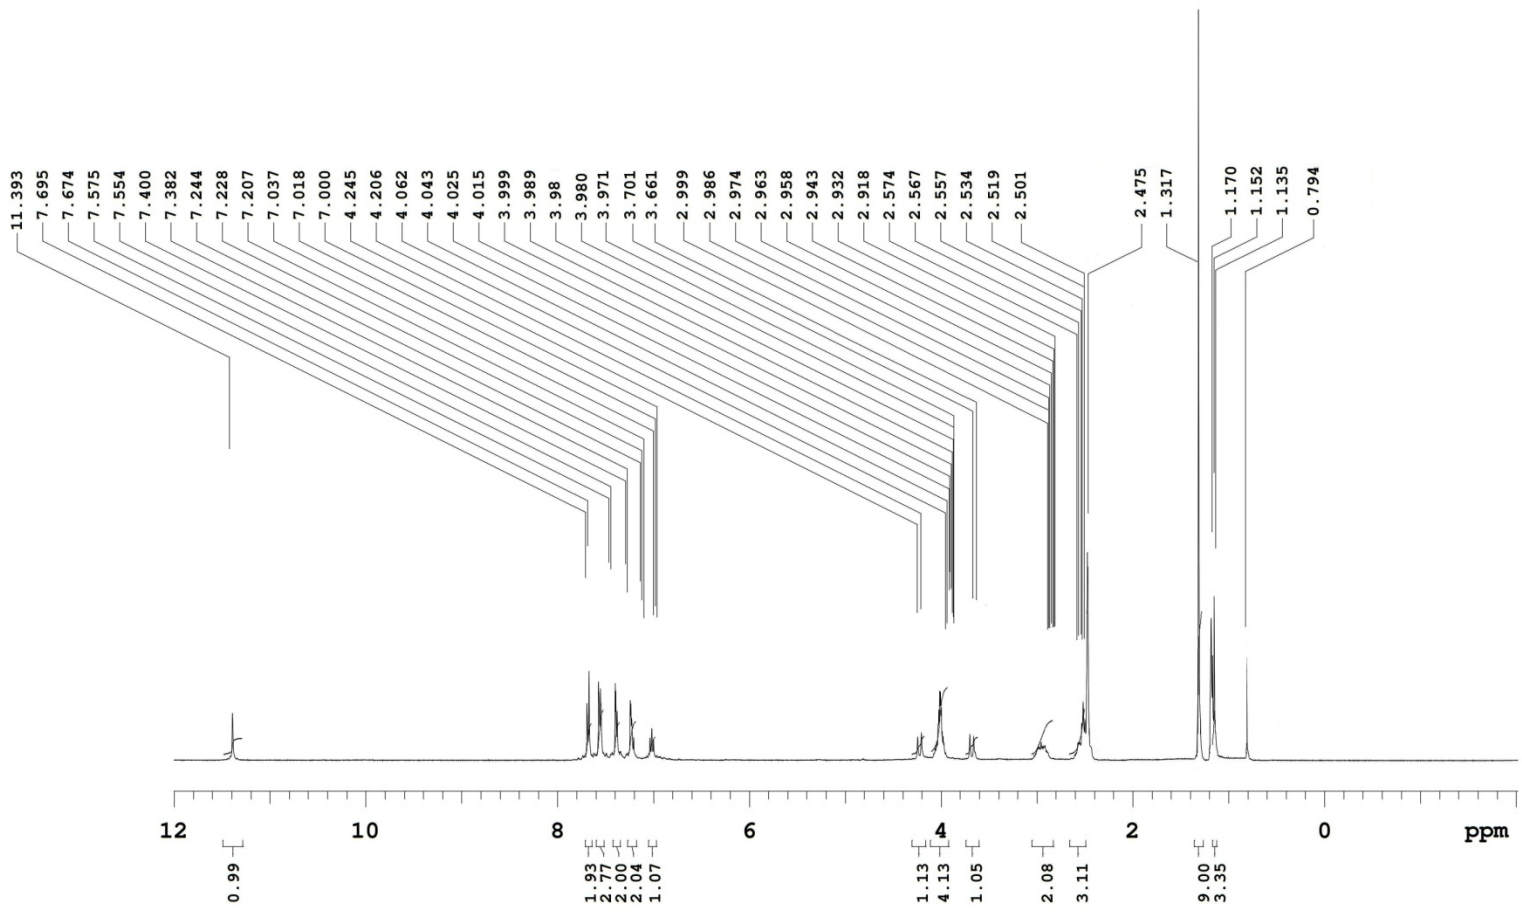

<sup>13</sup>C NMR of **4i** in DMSO-d<sub>6</sub>

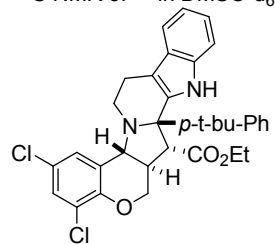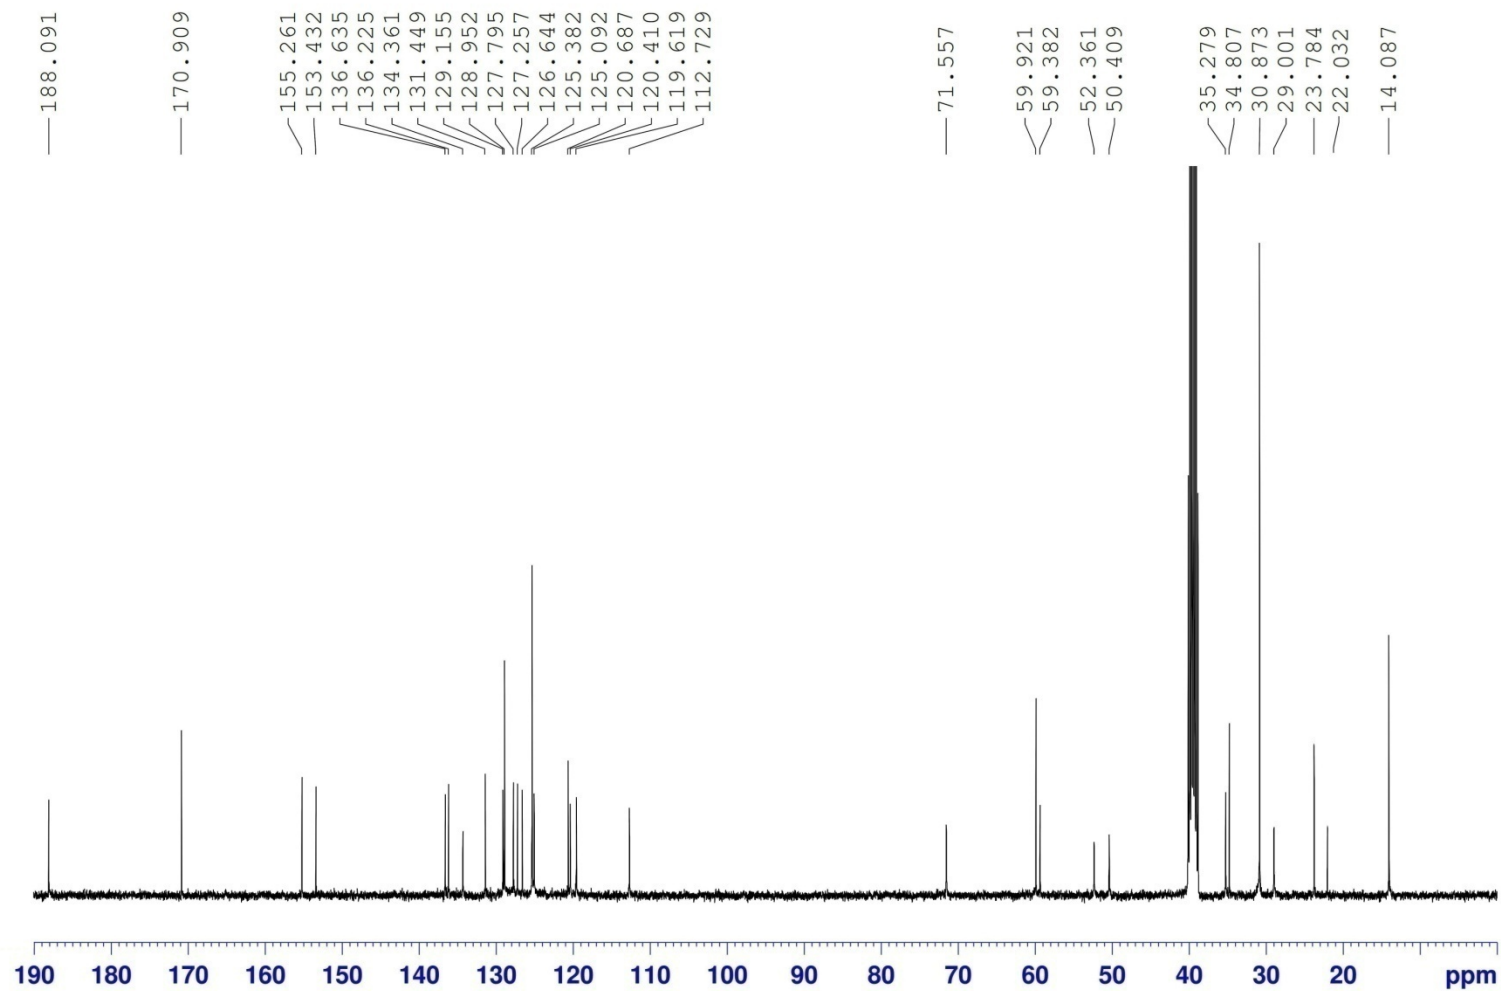

<sup>1</sup>H NMR of **4j** in DMSO-d<sub>6</sub>

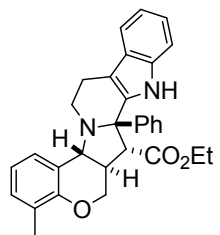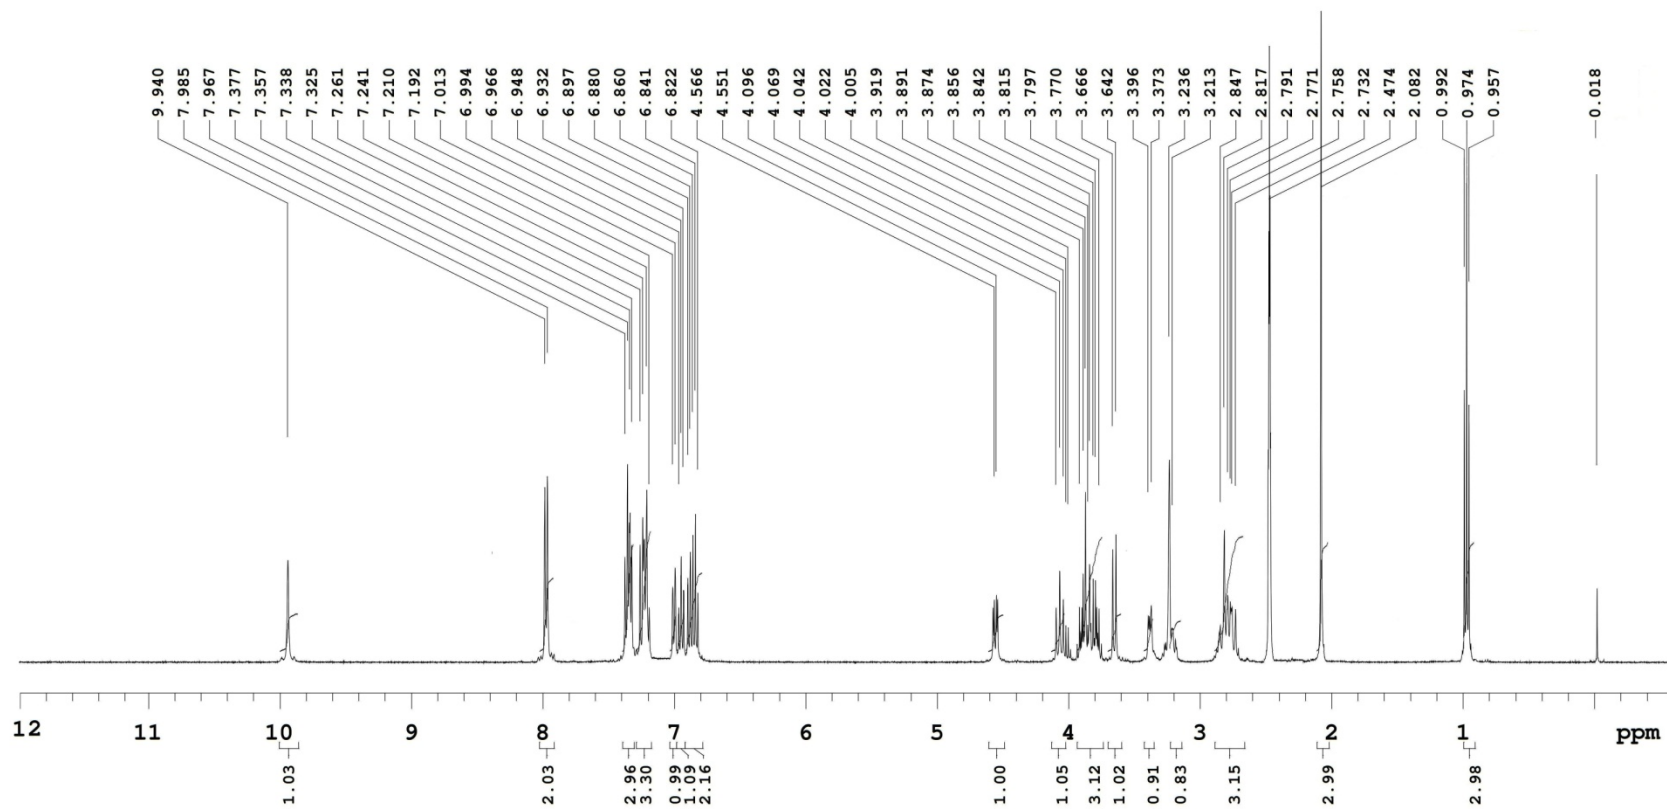

$^{13}\text{C}$  NMR of **4j** in  $\text{CDCl}_3$

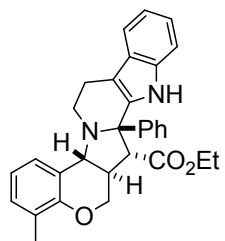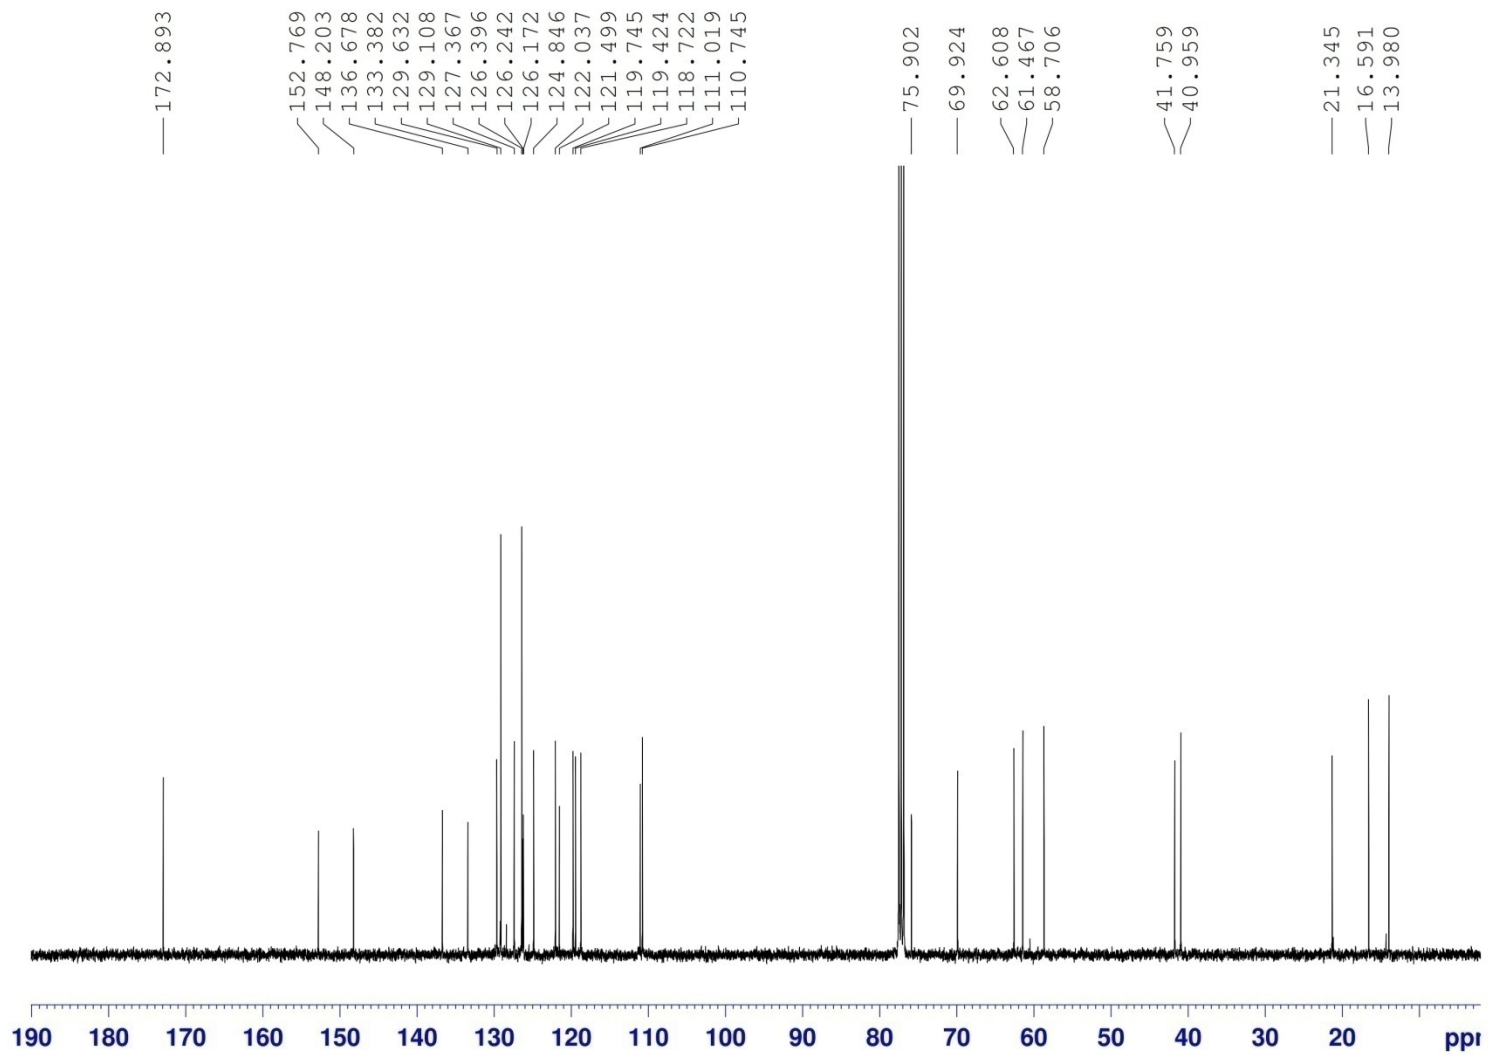



<sup>1</sup>H NMR of **4k** in DMSO-d<sub>6</sub>

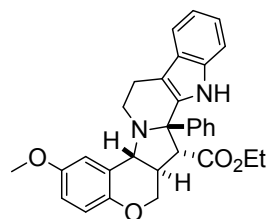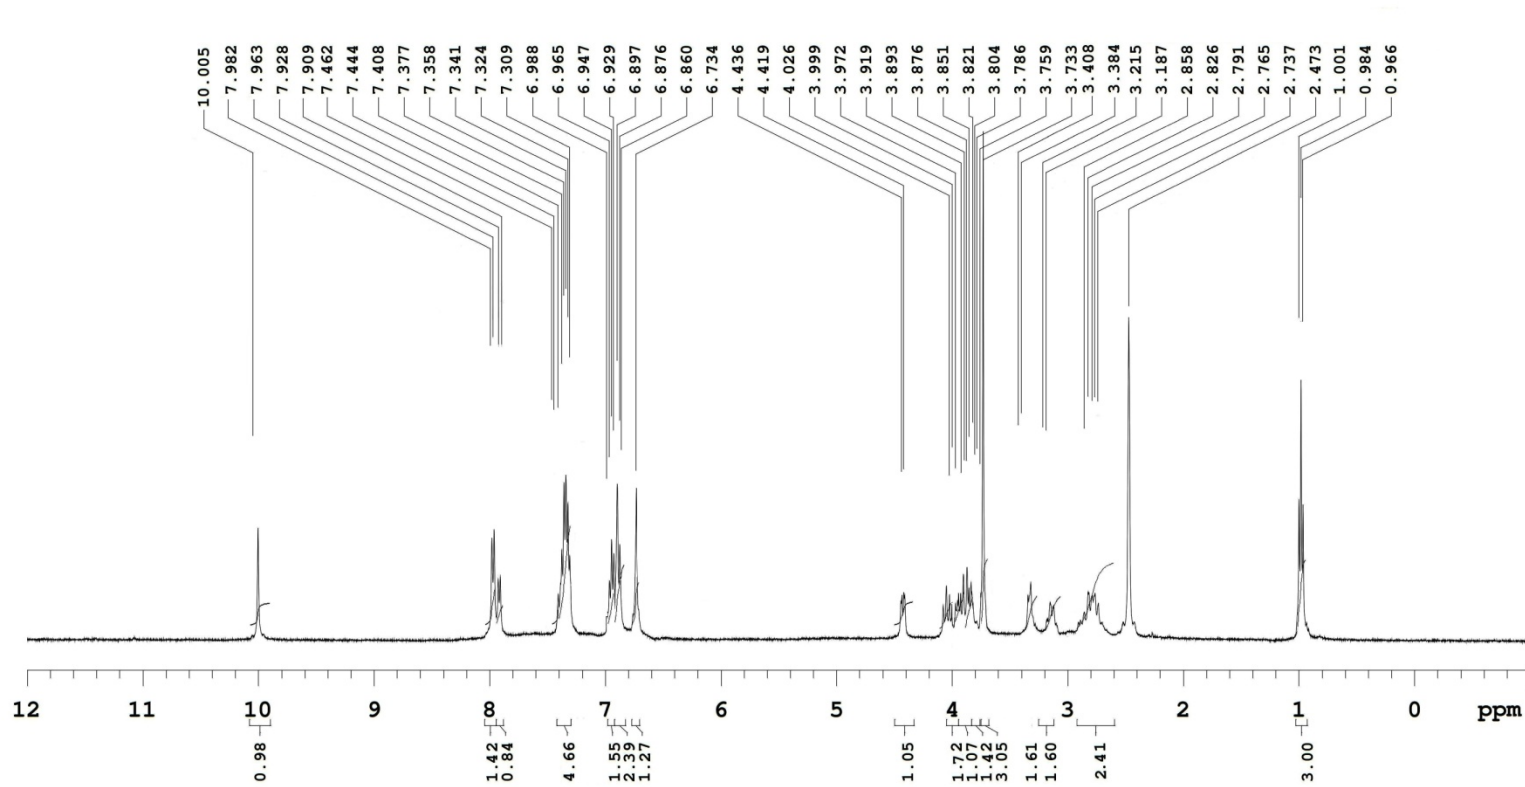

<sup>13</sup>C NMR of **4k** in CDCl<sub>3</sub>

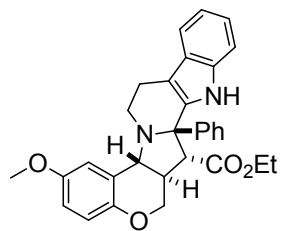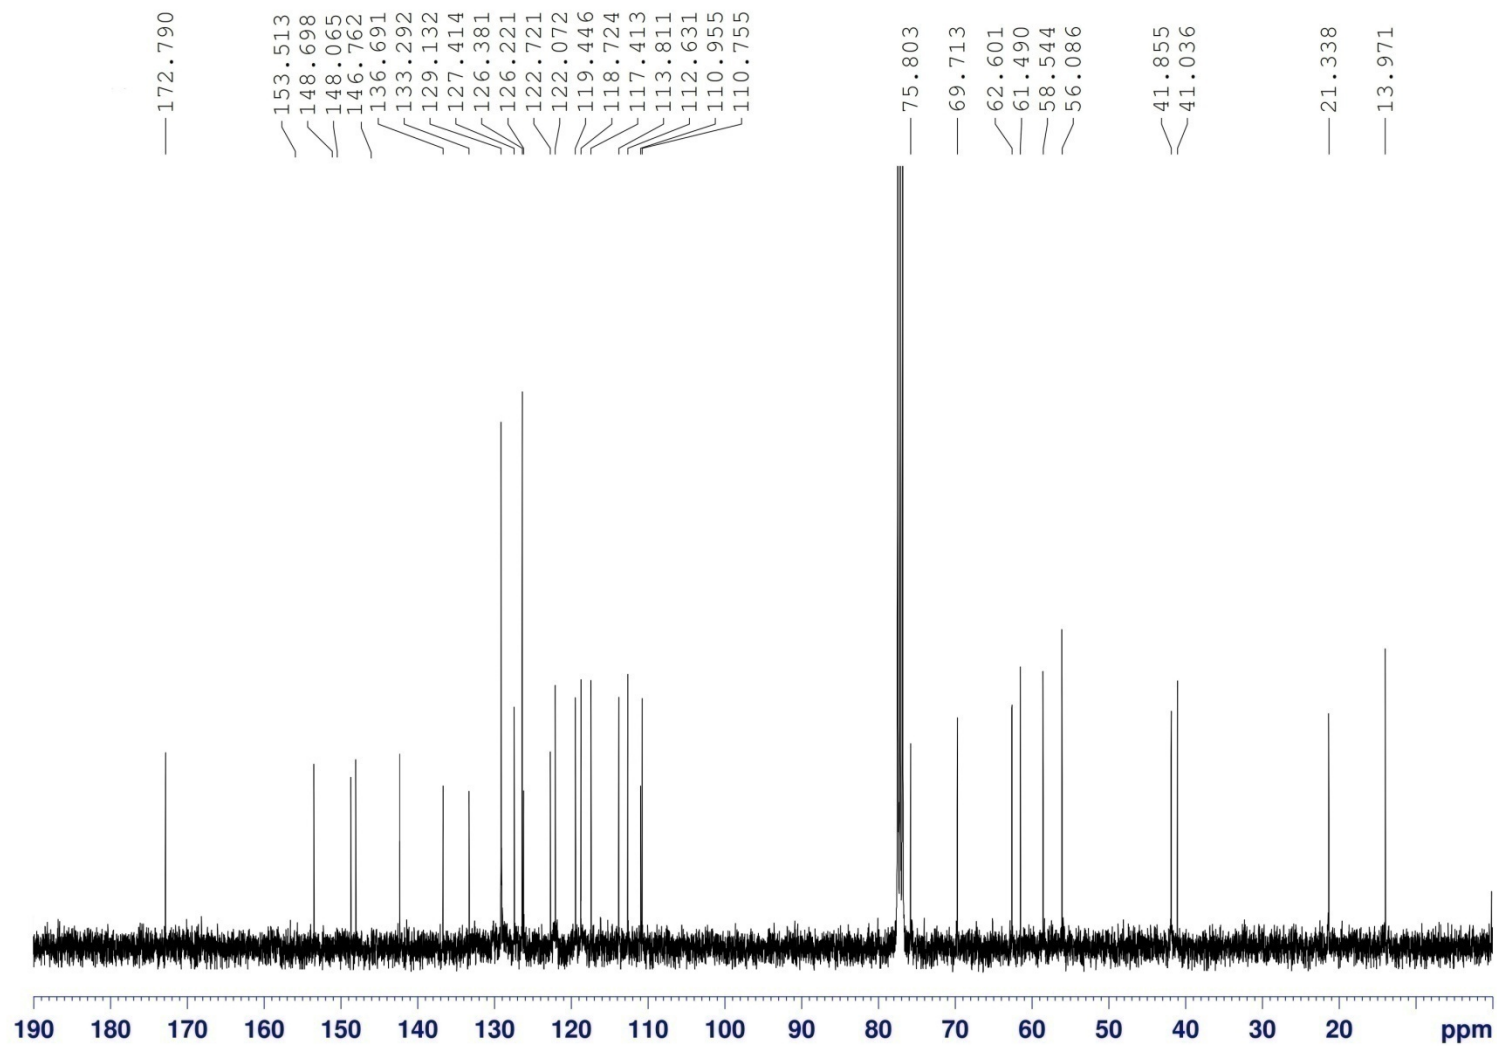

<sup>1</sup>H NMR of **4I** in DMSO-d<sub>6</sub>

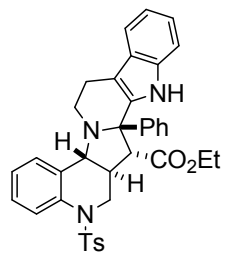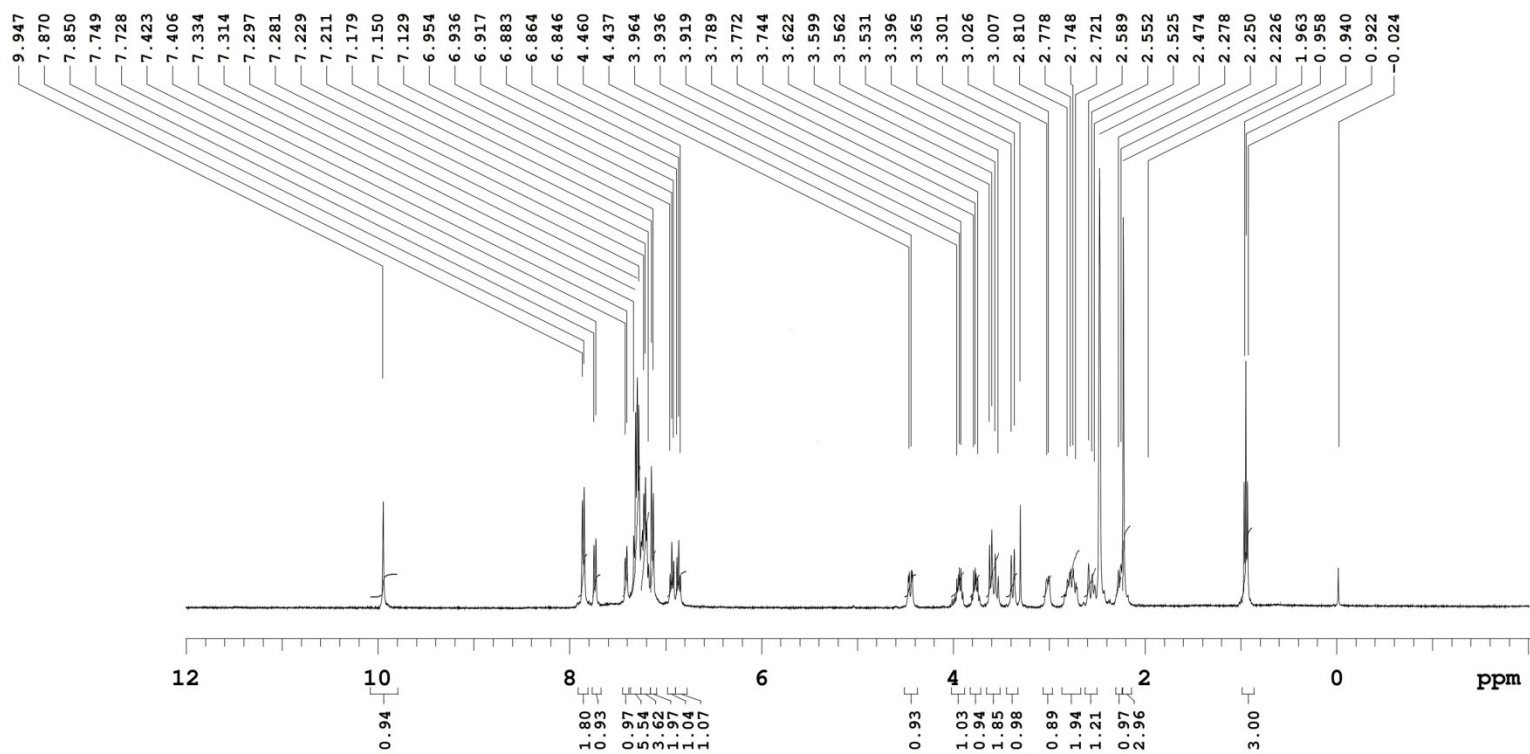

$^{13}\text{C}$  NMR of **4l** in  $\text{CDCl}_3$

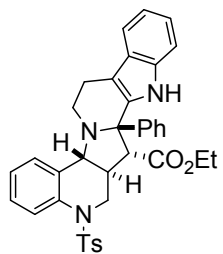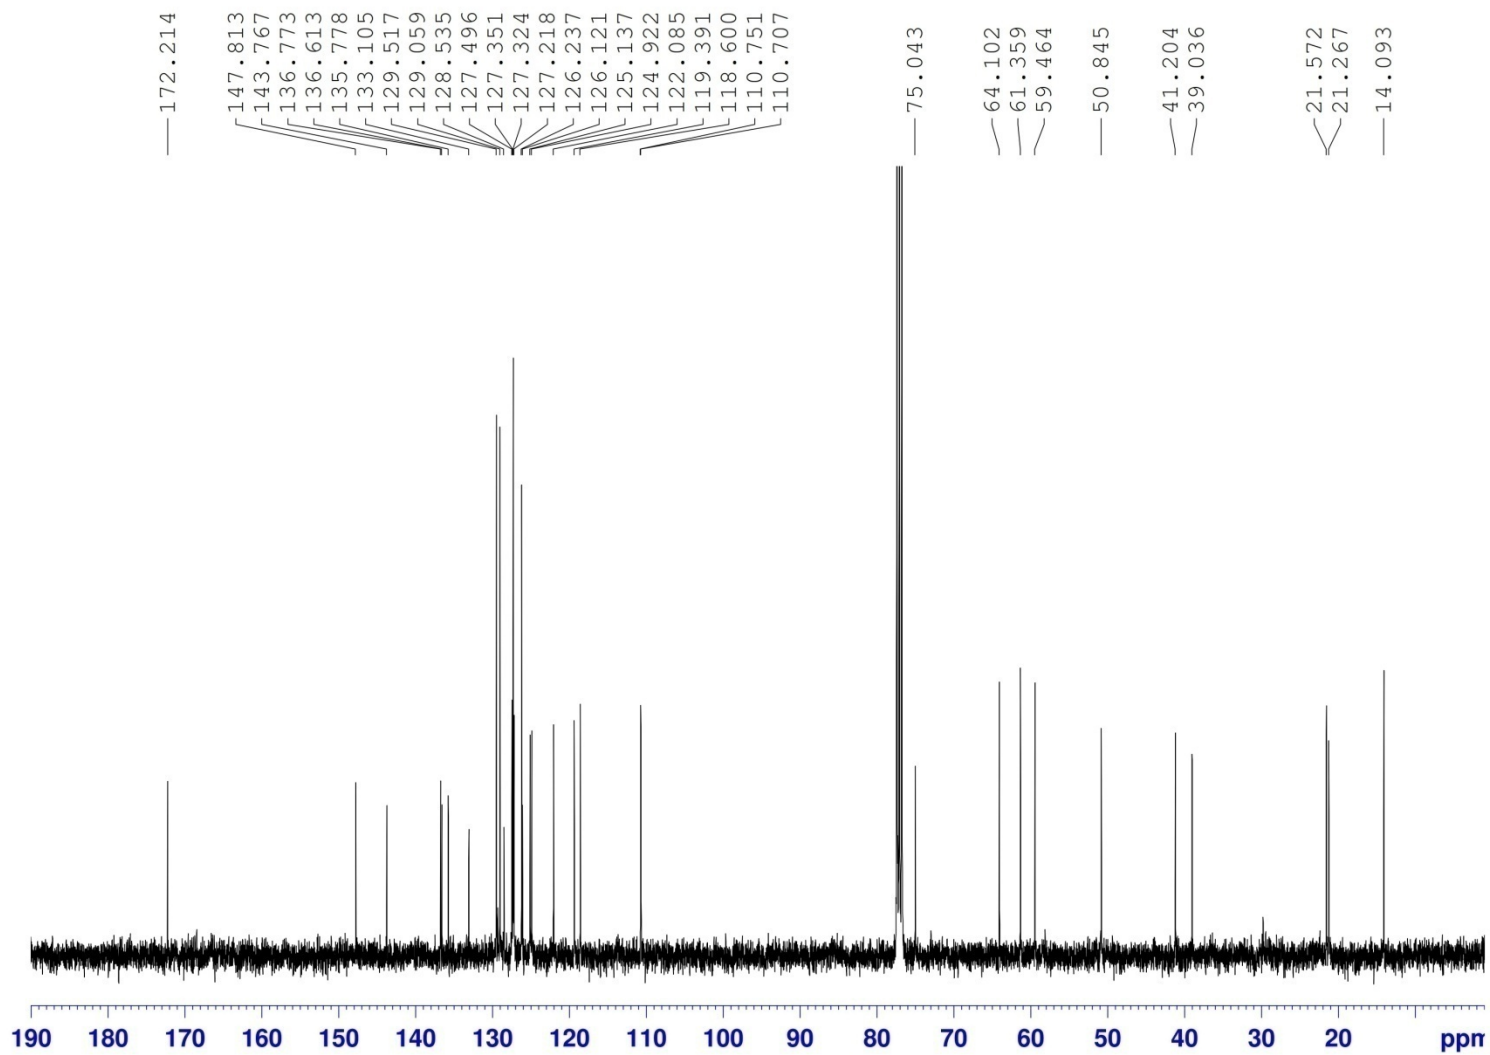

Supplement: c5nj01706h1.pdf [file c5nj01706h1.pdf]
