# Supplementary material for: Highly diastereoselective synthesis of polycyclic amines via redox neutral C–H functionalization
Source: Royal Society of Chemistry journal article supplement (doi:10.1039/c5nj01706h), 2015-01-01

## Supplementary material

### **Highly Diastereoselective Synthesis of Polycyclic Amines via-Redox Neutral C-H Functionalization**

#### **New Journal of Chemistry**

Chottanahalli. S. Pavan Kumar,<sup>a#</sup> Kachigere. B. Harsha,<sup>a#</sup> Nagarakere. C. Sandhaya,<sup>a</sup> Ajjalli. B. Ramesha,<sup>a</sup> Kempegowda Mantelingu,<sup>a\*</sup> and Kanchugarakoppal. S. Rangappa,<sup>a\*</sup>

<sup>#</sup>*DOS in Chemistry, University of Mysore, Manasagangotri, Mysuru-06, India*

#### **Contents.**

1. X-ray crystallographic data (experimental and tables) **1-11**
2. The <sup>1</sup>H and <sup>13</sup>C NMR Spectra of **3 (a-p)** and ORTEP of **3c** and **3p** **12-46**
3. The <sup>1</sup>H and <sup>13</sup>C NMR Spectra of **4 (a-l)** and ORTEP of **4c** **47-70**

Date: 01-07-2015

## Crystallographic Data

### Experimental

Single crystals of suitable dimensions were chosen carefully for X-ray diffraction studies. The X-intensity data were collected at a temperature of 293(2) K on a Bruker Proteum2 CCD diffractometer equipped with an X-ray generator operating at 45 kV and 10 mA, using CuK $\alpha$  radiation of wavelength 1.54178 Å. Data were collected for 24 frames per set with different settings of  $\varphi$  (0° and 90°), keeping the scan width of 0.5°, exposure time of 2 s, the sample to detector distance of 45.10 mm and  $2\theta$  value at 46.6°. The complete data sets were processed using *SAINT PLUS*.<sup>1</sup> The structures were solved by direct methods and refined by full-matrix least squares method on  $F^2$  using *SHELXS* and *SHELXL* programs<sup>2</sup>. The geometrical calculations were carried out using the program *PLATON*.<sup>3</sup> The molecular and packing diagrams were generated using the software *MERCURY*.<sup>4</sup> The details of the crystal structure and data refinement are given in Table 1. The list of bond lengths and bond angles of the non-hydrogen atoms are given in Table 4 and Table 5 respectively. Figures **3c**, **3p** and **4c** represent the ORTEP of the molecule with thermal ellipsoids drawn at 50% probability.

### References

- (1). Bruker, (2012). *SAINT PLUS*, Bruker AXS Inc., Madison, Wisconsin, USA.
- (2). G. M. Sheldrick, *Acta. Cryst.*, 2008, *A64*, 112.
- (3). A. L. Spek, *Acta. Cryst.*, *A46*, 1990, C34.
- (4). C. F. Macrae, I. J. Bruno, J. A. Chisholm, P. R. Edgington, P. McCabe, E. Pidcock, L. Rodriguez-Monge, R. Taylor, J. van de Streek, and P.A. Wood, *J. Appl. Cryst.*, 2008, **41**, 466.

Table 1: Crystal data and structure refinement details **3c**

|                                    |                                             |                             |  |
|------------------------------------|---------------------------------------------|-----------------------------|--|
| Empirical formula                  | $C_{30}H_{28}Br_2NO_5$                      |                             |  |
| Formula weight                     | 642.35                                      |                             |  |
| Temperature                        | 296(2) K                                    |                             |  |
| Wavelength                         | 1.54178 Å                                   |                             |  |
| $\theta$ range for above           | 3.50° to 64.52°                             |                             |  |
| Crystal system                     | Triclinic                                   |                             |  |
| Space group                        | P $\bar{1}$                                 |                             |  |
| Cell dimensions                    |                                             |                             |  |
| a = 9.9779(11) Å                   | b = 11.5105(12) Å                           | c = 13.4027(14) Å           |  |
| $\alpha = 91.472(6)^\circ$         | $\beta = 107.929(6)^\circ$                  | $\gamma = 109.296(6)^\circ$ |  |
| Volume                             | 1368.3(3) Å <sup>3</sup>                    |                             |  |
| Z                                  | 2                                           |                             |  |
| Density(calculated)                | 1.559 Mg m <sup>-3</sup>                    |                             |  |
| Absorption coefficient             | 4.094 mm <sup>-1</sup>                      |                             |  |
| F <sub>000</sub>                   | 650                                         |                             |  |
| Crystal size                       | 0.25 × 0.25 × 0.25 mm                       |                             |  |
| $\theta$ range for data collection | 3.50° to 64.52°                             |                             |  |
| Index ranges                       | -11 ≤ h ≤ 11                                |                             |  |
|                                    | -13 ≤ k ≤ 13                                |                             |  |
|                                    | -15 ≤ l ≤ 14                                |                             |  |
| Reflections collected              | 13269                                       |                             |  |
| Independent reflections            | 4454 [R <sub>int</sub> = 0.0522]            |                             |  |
| Refinement method                  | Full matrix least-squares on F <sup>2</sup> |                             |  |
| Data / restraints / parameters     | 4454 / 0 / 346                              |                             |  |
| Goodness-of-fit on F <sup>2</sup>  | 1.041                                       |                             |  |
| Final [I > 2σ(I)]                  | R1 = 0.0609, wR2 = 0.1680                   |                             |  |
| R indices (all data)               | R1 = 0.0758, wR2 = 0.1850                   |                             |  |
| Largest diff. peak and hole        | 0.591 and -0.556 e Å <sup>-3</sup>          |                             |  |

Table 2: Atomic coordinates and equivalent thermal parameters of the non-hydrogen atoms.

| Atom | x          | y          | z          | U <sub>eq</sub> |
|------|------------|------------|------------|-----------------|
| Br1  | 0.81469(9) | 0.24281(7) | 0.25466(4) | 0.0768(3)       |
| C2   | 0.9232(6)  | 0.2883(5)  | 0.4022(4)  | 0.0523(12)      |
| C3   | 1.0708(7)  | 0.2946(5)  | 0.4393(4)  | 0.0634(14)      |
| C4   | 1.1500(6)  | 0.3276(6)  | 0.5467(4)  | 0.0648(15)      |
| C5   | 1.0816(6)  | 0.3531(5)  | 0.6163(4)  | 0.0530(12)      |
| O6   | 1.1715(4)  | 0.3848(4)  | 0.7209(3)  | 0.0685(11)      |
| C7   | 1.1134(5)  | 0.4155(5)  | 0.7999(4)  | 0.0550(12)      |
| C8   | 0.9463(5)  | 0.3471(4)  | 0.7668(3)  | 0.0411(10)      |
| C9   | 0.8620(5)  | 0.3793(4)  | 0.8337(3)  | 0.0395(9)       |
| C10  | 0.7043(5)  | 0.3737(4)  | 0.7478(3)  | 0.0363(9)       |
| C11  | 0.5649(5)  | 0.2959(4)  | 0.7720(3)  | 0.0384(9)       |
| C12  | 0.5438(5)  | 0.3310(4)  | 0.8646(3)  | 0.0436(10)      |
| C13  | 0.4155(6)  | 0.2724(5)  | 0.8871(4)  | 0.0493(11)      |
| C14  | 0.2980(6)  | 0.1749(5)  | 0.8144(4)  | 0.0523(12)      |
| C15  | 0.3190(6)  | 0.1352(5)  | 0.7238(4)  | 0.0528(12)      |
| C16  | 0.4533(5)  | 0.1946(4)  | 0.7024(3)  | 0.0432(10)      |
| C17  | 0.4746(5)  | 0.1495(4)  | 0.6037(4)  | 0.0485(11)      |
| C18  | 0.6410(5)  | 0.1900(4)  | 0.6187(3)  | 0.0415(10)      |
| N19  | 0.7070(4)  | 0.3276(3)  | 0.6431(2)  | 0.0347(7)       |
| C20  | 0.8702(5)  | 0.3800(4)  | 0.6594(3)  | 0.0373(9)       |
| C21  | 0.9318(5)  | 0.3465(4)  | 0.5785(3)  | 0.0405(10)      |
| C22  | 0.8540(5)  | 0.3154(4)  | 0.4701(3)  | 0.0454(10)      |
| C23  | 0.6951(5)  | 0.5039(4)  | 0.7387(3)  | 0.0342(9)       |
| C24  | 0.7783(5)  | 0.6081(4)  | 0.8140(3)  | 0.0444(10)      |
| C25  | 0.7552(6)  | 0.7196(4)  | 0.8024(4)  | 0.0519(12)      |
| C26  | 0.6462(5)  | 0.7287(4)  | 0.7135(3)  | 0.0433(10)      |
| C27  | 0.5602(6)  | 0.6269(4)  | 0.6373(3)  | 0.0491(11)      |
| C28  | 0.5855(6)  | 0.5161(4)  | 0.6496(3)  | 0.0455(10)      |
| Br29 | 0.60863(7) | 0.87909(5) | 0.69793(4) | 0.0650(3)       |
| C30  | 0.8472(5)  | 0.3015(4)  | 0.9213(3)  | 0.0441(10)      |
| O31  | 0.8673(4)  | 0.3421(3)  | 1.0093(2)  | 0.0598(9)       |
| O32  | 0.8152(5)  | 0.1812(3)  | 0.8903(3)  | 0.0694(11)      |
| C33  | 0.8062(10) | 0.0976(7)  | 0.9713(5)  | 0.090(2)        |
| C34  | 0.6577(12) | 0.0543(8)  | 0.9739(6)  | 0.112(3)        |
| O35  | 0.1704(4)  | 0.1259(4)  | 0.8383(3)  | 0.0742(12)      |
| C36  | 0.0430(7)  | 0.0430(6)  | 0.7606(6)  | 0.086(2)        |
| O37  | 0.3898(4)  | 0.3019(4)  | 0.9775(3)  | 0.0642(10)      |
| C38  | 0.5202(7)  | 0.3633(7)  | 1.0677(4)  | 0.0798(19)      |

Table 3: Anisotropic thermal parameters of the non-hydrogen atoms.

| Atom | $U_{11}$   | $U_{22}$   | $U_{33}$   | $U_{23}$   | $U_{13}$   | $U_{12}$    |
|------|------------|------------|------------|------------|------------|-------------|
| Br1  | 0.1042(6)  | 0.0965(5)  | 0.0485(4)  | 0.0537(4)  | 0.0316(4)  | 0.0129(3)   |
| C2   | 0.071(4)   | 0.054(3)   | 0.052(3)   | 0.034(3)   | 0.035(3)   | 0.020(2)    |
| C3   | 0.075(4)   | 0.073(3)   | 0.068(3)   | 0.038(3)   | 0.045(3)   | 0.022(3)    |
| C4   | 0.045(3)   | 0.093(4)   | 0.074(3)   | 0.037(3)   | 0.031(3)   | 0.022(3)    |
| C5   | 0.047(3)   | 0.061(3)   | 0.059(3)   | 0.024(2)   | 0.021(2)   | 0.020(2)    |
| O6   | 0.039(2)   | 0.111(3)   | 0.060(2)   | 0.034(2)   | 0.0135(17) | 0.014(2)    |
| C7   | 0.035(3)   | 0.072(3)   | 0.051(3)   | 0.018(2)   | 0.008(2)   | 0.002(2)    |
| C8   | 0.042(3)   | 0.041(2)   | 0.041(2)   | 0.0184(19) | 0.011(2)   | 0.0079(17)  |
| C9   | 0.039(2)   | 0.037(2)   | 0.039(2)   | 0.0138(18) | 0.0100(19) | 0.0051(17)  |
| C10  | 0.038(2)   | 0.038(2)   | 0.0328(19) | 0.0143(18) | 0.0104(18) | 0.0040(16)  |
| C11  | 0.038(2)   | 0.033(2)   | 0.044(2)   | 0.0133(18) | 0.0138(19) | 0.0105(17)  |
| C12  | 0.043(3)   | 0.043(2)   | 0.048(2)   | 0.016(2)   | 0.017(2)   | 0.0091(18)  |
| C13  | 0.049(3)   | 0.058(3)   | 0.052(3)   | 0.023(2)   | 0.025(2)   | 0.017(2)    |
| C14  | 0.045(3)   | 0.048(3)   | 0.071(3)   | 0.013(2)   | 0.031(3)   | 0.016(2)    |
| C15  | 0.038(3)   | 0.045(2)   | 0.066(3)   | 0.004(2)   | 0.017(2)   | 0.004(2)    |
| C16  | 0.040(3)   | 0.038(2)   | 0.053(2)   | 0.0134(19) | 0.018(2)   | 0.0077(18)  |
| C17  | 0.047(3)   | 0.041(2)   | 0.050(2)   | 0.008(2)   | 0.015(2)   | -0.0030(19) |
| C18  | 0.043(3)   | 0.035(2)   | 0.046(2)   | 0.0115(18) | 0.016(2)   | -0.0005(17) |
| N19  | 0.0347(19) | 0.0312(16) | 0.0377(17) | 0.0108(14) | 0.0124(15) | 0.0030(13)  |
| C20  | 0.032(2)   | 0.038(2)   | 0.042(2)   | 0.0120(17) | 0.0118(19) | 0.0073(16)  |
| C21  | 0.036(2)   | 0.043(2)   | 0.049(2)   | 0.0183(19) | 0.018(2)   | 0.0132(18)  |
| C22  | 0.046(3)   | 0.051(2)   | 0.047(2)   | 0.024(2)   | 0.019(2)   | 0.0135(19)  |
| C23  | 0.035(2)   | 0.034(2)   | 0.0357(19) | 0.0113(17) | 0.0150(18) | 0.0051(15)  |
| C24  | 0.043(3)   | 0.040(2)   | 0.043(2)   | 0.0184(19) | 0.001(2)   | 0.0016(18)  |
| C25  | 0.048(3)   | 0.038(2)   | 0.056(3)   | 0.010(2)   | 0.005(2)   | -0.0086(19) |
| C26  | 0.046(3)   | 0.040(2)   | 0.050(2)   | 0.019(2)   | 0.020(2)   | 0.0073(18)  |
| C27  | 0.051(3)   | 0.049(3)   | 0.044(2)   | 0.024(2)   | 0.005(2)   | 0.0047(19)  |
| C28  | 0.047(3)   | 0.044(2)   | 0.042(2)   | 0.019(2)   | 0.007(2)   | -0.0032(18) |
| Br29 | 0.0777(5)  | 0.0432(3)  | 0.0732(4)  | 0.0313(3)  | 0.0134(3)  | 0.0066(2)   |
| C30  | 0.048(3)   | 0.049(2)   | 0.037(2)   | 0.020(2)   | 0.013(2)   | 0.0077(18)  |
| O31  | 0.071(2)   | 0.064(2)   | 0.0369(17) | 0.0229(19) | 0.0096(16) | 0.0032(15)  |
| O32  | 0.121(3)   | 0.0490(19) | 0.0499(18) | 0.035(2)   | 0.039(2)   | 0.0185(15)  |
| C33  | 0.138(7)   | 0.071(4)   | 0.075(4)   | 0.034(4)   | 0.056(4)   | 0.030(3)    |
| C34  | 0.142(8)   | 0.100(6)   | 0.092(5)   | 0.034(5)   | 0.043(5)   | 0.039(5)    |
| O35  | 0.050(2)   | 0.077(3)   | 0.094(3)   | 0.006(2)   | 0.041(2)   | 0.012(2)    |
| C36  | 0.058(4)   | 0.062(4)   | 0.142(6)   | 0.009(3)   | 0.051(4)   | 0.006(4)    |
| O37  | 0.054(2)   | 0.089(3)   | 0.058(2)   | 0.0251(19) | 0.0317(18) | 0.0117(18)  |
| C38  | 0.077(4)   | 0.120(6)   | 0.052(3)   | 0.038(4)   | 0.031(3)   | 0.012(3)    |

Table 4: Bond lengths ( $\text{\AA}$ ).

| Atoms   | Length   | Atoms    | Length    |
|---------|----------|----------|-----------|
| Br1-C2  | 1.900(5) | C14-C15  | 1.385(7)  |
| C2-C3   | 1.377(8) | C15-C16  | 1.409(7)  |
| C2-C22  | 1.384(6) | C16-C17  | 1.508(6)  |
| C3-C4   | 1.384(8) | C17-C18  | 1.514(6)  |
| C4-C5   | 1.389(7) | C18-N19  | 1.483(5)  |
| C5-O6   | 1.373(6) | N19-C20  | 1.480(5)  |
| C5-C21  | 1.398(7) | C20-C21  | 1.498(6)  |
| O6-C7   | 1.441(6) | C21-C22  | 1.392(6)  |
| C7-C8   | 1.502(7) | C23-C24  | 1.382(6)  |
| C8-C9   | 1.517(6) | C23-C28  | 1.396(6)  |
| C8-C20  | 1.530(6) | C24-C25  | 1.381(7)  |
| C9-C30  | 1.510(6) | C25-C26  | 1.377(7)  |
| C9-C10  | 1.618(6) | C26-C27  | 1.374(6)  |
| C10-N19 | 1.499(5) | C26-Br29 | 1.892(4)  |
| C10-C11 | 1.520(6) | C27-C28  | 1.384(7)  |
| C10-C23 | 1.538(6) | C30-O31  | 1.189(5)  |
| C11-C16 | 1.385(6) | C30-O32  | 1.338(6)  |
| C11-C12 | 1.393(6) | O32-C33  | 1.473(6)  |
| C12-C13 | 1.365(6) | C33-C34  | 1.411(13) |
| C13-O37 | 1.369(6) | O35-C36  | 1.395(7)  |
| C13-C14 | 1.398(7) | O37-C38  | 1.426(7)  |
| C14-O35 | 1.352(6) |          |           |

Table 5: Bond angles (°).

| Atoms       | Angle    | Atoms        | Angle    |
|-------------|----------|--------------|----------|
| C3-C2-C22   | 121.2(5) | C11-C16-C15  | 119.5(4) |
| C3-C2-Br1   | 118.9(4) | C11-C16-C17  | 120.1(4) |
| C22-C2-Br1  | 119.9(4) | C15-C16-C17  | 120.4(4) |
| C2-C3-C4    | 119.0(5) | C16-C17-C18  | 109.9(4) |
| C3-C4-C5    | 120.7(5) | N19-C18-C17  | 108.4(4) |
| O6-C5-C4    | 115.3(5) | C20-N19-C18  | 114.0(3) |
| O6-C5-C21   | 124.3(4) | C20-N19-C10  | 101.0(3) |
| C4-C5-C21   | 120.3(5) | C18-N19-C10  | 112.1(3) |
| C5-O6-C7    | 120.2(4) | N19-C20-C21  | 120.9(4) |
| O6-C7-C8    | 110.3(4) | N19-C20-C8   | 104.9(3) |
| C7-C8-C9    | 117.9(4) | C21-C20-C8   | 110.1(4) |
| C7-C8-C20   | 109.0(4) | C22-C21-C5   | 118.6(4) |
| C9-C8-C20   | 101.7(3) | C22-C21-C20  | 125.2(4) |
| C30-C9-C8   | 115.0(4) | C5-C21-C20   | 116.2(4) |
| C30-C9-C10  | 115.1(3) | C2-C22-C21   | 120.3(5) |
| C8-C9-C10   | 104.0(3) | C24-C23-C28  | 116.9(4) |
| N19-C10-C11 | 112.8(3) | C24-C23-C10  | 126.0(4) |
| N19-C10-C23 | 106.2(3) | C28-C23-C10  | 117.0(4) |
| C11-C10-C23 | 106.2(3) | C25-C24-C23  | 122.1(4) |
| N19-C10-C9  | 105.4(3) | C26-C25-C24  | 119.7(4) |
| C11-C10-C9  | 114.4(3) | C27-C26-C25  | 120.0(4) |
| C23-C10-C9  | 111.6(3) | C27-C26-Br29 | 119.5(4) |
| C16-C11-C12 | 118.3(4) | C25-C26-Br29 | 120.4(3) |
| C16-C11-C10 | 122.4(4) | C26-C27-C28  | 119.6(4) |
| C12-C11-C10 | 119.2(4) | C27-C28-C23  | 121.7(4) |
| C13-C12-C11 | 122.6(4) | O31-C30-O32  | 123.3(4) |
| C12-C13-O37 | 125.0(5) | O31-C30-C9   | 124.4(4) |
| C12-C13-C14 | 119.6(4) | O32-C30-C9   | 112.3(3) |
| O37-C13-C14 | 115.4(4) | C30-O32-C33  | 116.8(4) |
| O35-C14-C15 | 124.6(5) | C34-C33-O32  | 109.0(7) |
| O35-C14-C13 | 116.7(4) | C14-O35-C36  | 118.3(5) |
| C15-C14-C13 | 118.7(4) | C13-O37-C38  | 116.2(4) |
| C14-C15-C16 | 121.1(5) |              |          |

Table 1: Crystal data and structure refinement details **3P**.

|                                   |                                                                              |                 |
|-----------------------------------|------------------------------------------------------------------------------|-----------------|
| Empirical formula                 | C <sub>35</sub> H <sub>36</sub> N <sub>2</sub> O <sub>6</sub> S <sub>2</sub> |                 |
| Formula weight                    | 644.78                                                                       |                 |
| Temperature                       | 296(2) K                                                                     |                 |
| Wavelength                        | 1.54178 Å                                                                    |                 |
| cell determination                | 4501                                                                         | Reflns. for     |
| θ range for above system          | 2.62° to 64.92° Crystal                                                      |                 |
| P 21/c                            | Monoclinic Space group                                                       |                 |
| Cell dimensions                   |                                                                              |                 |
| a = 17.5740(17) Å                 | b = 8.9640(9) Å                                                              | c = 20.843(2) Å |
| α = 90.00°                        | β = 106.682(4)°                                                              | γ = 90.00°      |
| Volume                            | 3145.3(5) Å <sup>3</sup>                                                     |                 |
| Z                                 | 4                                                                            |                 |
| Density(calculated)               | 1.362 Mg m <sup>-3</sup>                                                     |                 |
| Absorption coefficient            | 1.943 mm <sup>-1</sup>                                                       |                 |
| F <sub>000</sub>                  | 1360                                                                         |                 |
| Crystal size                      | 0.27 × 0.27 × 0.27 mm                                                        |                 |
| θ range for data collection       | 2.62° to 64.92°                                                              |                 |
| Index ranges                      | -20 ≤ h ≤ 20                                                                 |                 |
|                                   | -10 ≤ k ≤ 10                                                                 |                 |
|                                   | -24 ≤ l ≤ 20                                                                 |                 |
| Reflections collected             | 14873                                                                        |                 |
| Independent reflections           | 5126 [R <sub>int</sub> = 0.0399]                                             |                 |
| Absorption correction             | multi-scan                                                                   |                 |
| Refinement method                 | Full matrix least-squares on F <sup>2</sup>                                  |                 |
| Data / restraints / parameters    | 5126 / 0 / 410                                                               |                 |
| Goodness-of-fit on F <sup>2</sup> | 1.078                                                                        |                 |
| Final [I > 2σ(I)]                 | R1 = 0.0545, wR2 = 0.1671                                                    |                 |
| R indices (all data)              | R1 = 0.0596, wR2 = 0.1727                                                    |                 |
| Largest diff. peak and hole       | 0.752 and -0.630 e Å <sup>-3</sup>                                           |                 |



Table 2: Bond lengths ( $\text{\AA}$ ).

| Atoms   | Length   | Atoms    | Length   |
|---------|----------|----------|----------|
| S36-O38 | 1.427(2) | C9-C10   | 1.532(3) |
| S36-O37 | 1.428(3) | C4-C5    | 1.404(3) |
| S36-N14 | 1.670(2) | C4-C3    | 1.501(3) |
| S36-C39 | 1.757(3) | C7-C8    | 1.378(3) |
| S26-C25 | 1.690(3) | C7-C6    | 1.407(4) |
| S26-C22 | 1.704(2) | C21-C20  | 1.503(3) |
| O33-C31 | 1.337(3) | C21-C182 | 1.504(3) |
| O33-C34 | 1.453(3) | C20-C19  | 1.388(4) |
| O27-C7  | 1.374(3) | C20-C15  | 1.406(4) |
| O27-C28 | 1.413(4) | C15-C16  | 1.404(4) |
| O29-C6  | 1.374(3) | C12-C13  | 1.516(3) |
| O29-C30 | 1.421(4) | C3-C2    | 1.513(3) |
| O32-C31 | 1.199(3) | C5-C6    | 1.373(4) |
| N1-C2   | 1.470(3) | C19-C18  | 1.384(4) |
| N1-C21  | 1.481(3) | C16-C17  | 1.375(5) |
| N1-C10  | 1.495(3) | C39-C44  | 1.389(5) |
| N14-C15 | 1.441(4) | C39-C40  | 1.391(4) |
| N14-C13 | 1.488(3) | C18-C17  | 1.372(5) |
| C23-C24 | 1.468(4) | C24-C25  | 1.343(5) |
| C23-C22 | 1.489(4) | C40-C41  | 1.373(4) |
| C22-C10 | 1.520(3) | C41-C42  | 1.383(5) |
| C11-C31 | 1.516(3) | C42-C43  | 1.390(4) |
| C11-C12 | 1.525(3) | C42-C45  | 1.504(5) |
| C11-C10 | 1.631(3) | C44-C43  | 1.364(5) |
| C9-C4   | 1.378(4) | C34-C35  | 1.476(5) |
| C9-C8   | 1.405(3) |          |          |

Table 1: Crystal data and structure refinement details **4C**.

|                                    |                                             |                       |  |
|------------------------------------|---------------------------------------------|-----------------------|--|
| Empirical formula                  | $C_{30}H_{26}BrClN_2O_3$                    |                       |  |
| Formula weight                     | 577.89                                      |                       |  |
| Temperature                        | 296(2) K                                    |                       |  |
| Wavelength                         | 1.54178 Å                                   |                       |  |
| Reflns. for cell determination     | 4104                                        |                       |  |
| $\theta$ range for above           | 6.72° to 64.51°                             |                       |  |
| Crystal system                     | Triclinic                                   |                       |  |
| Space group                        | P $\bar{1}$                                 |                       |  |
| Cell dimensions                    |                                             |                       |  |
| a = 9.5848(7) Å                    | b = 11.0031(8) Å                            | c = 14.0353(11) Å     |  |
| $\alpha$ = 87.764(2)°              | $\beta$ = 70.878(2)°                        | $\gamma$ = 65.624(2)° |  |
| Volume                             | 1265.88(16) Å <sup>3</sup>                  |                       |  |
| Z                                  | 2                                           |                       |  |
| Density(calculated)                | 1.516 Mg m <sup>-3</sup>                    |                       |  |
| Absorption coefficient             | 3.478 mm <sup>-1</sup>                      |                       |  |
| F <sub>000</sub>                   | 592                                         |                       |  |
| Crystal size                       | 0.25 × 0.25 × 0.25 mm                       |                       |  |
| $\theta$ range for data collection | 6.72° to 64.51°                             |                       |  |
| Index ranges                       | -11 ≤ h ≤ 11                                |                       |  |
|                                    | -12 ≤ k ≤ 12                                |                       |  |
|                                    | -16 ≤ l ≤ 16                                |                       |  |
| Reflections collected              | 14548                                       |                       |  |
| Independent reflections            | 4174 [R <sub>int</sub> = 0.0313]            |                       |  |
| Absorption correction              | multi-scan                                  |                       |  |
| Refinement method                  | Full matrix least-squares on F <sup>2</sup> |                       |  |
| Data / restraints / parameters     | 4174 / 0 / 335                              |                       |  |
| Goodness-of-fit on F <sup>2</sup>  | 1.103                                       |                       |  |
| Final [I > 2σ(I)]                  | R1 = 0.0331, wR2 = 0.0959                   |                       |  |
| R indices (all data)               | R1 = 0.0335, wR2 = 0.0965                   |                       |  |
| Largest diff. peak and hole        | 0.376 and -0.584 e Å <sup>-3</sup>          |                       |  |

Table 2: Bond lengths ( $\text{\AA}$ ).

| Atoms   | Length   | Atoms    | Length   |
|---------|----------|----------|----------|
| Br1-C2  | 1.904(2) | C15-C16  | 1.406(3) |
| C2-C25  | 1.381(3) | C16-C17  | 1.384(3) |
| C2-C3   | 1.387(3) | C17-C18  | 1.402(3) |
| C3-C4   | 1.376(3) | C18-C19  | 1.435(3) |
| C4-C5   | 1.390(3) | C19-C20  | 1.495(3) |
| C5-O6   | 1.369(3) | C20-C21  | 1.532(3) |
| C5-C24  | 1.403(3) | C21-N22  | 1.484(2) |
| O6-C7   | 1.443(3) | N22-C23  | 1.478(3) |
| C7-C8   | 1.516(3) | C23-C24  | 1.499(3) |
| C8-C23  | 1.523(3) | C24-C25  | 1.395(3) |
| C8-C9   | 1.532(3) | C26-C31  | 1.387(3) |
| C9-C33  | 1.514(3) | C26-C27  | 1.397(3) |
| C9-C10  | 1.614(3) | C27-C28  | 1.386(3) |
| C10-N22 | 1.493(3) | C28-C29  | 1.387(3) |
| C10-C11 | 1.504(3) | C29-C30  | 1.381(3) |
| C10-C26 | 1.546(3) | C29-C132 | 1.741(2) |
| C11-C19 | 1.360(3) | C30-C31  | 1.395(3) |
| C11-N12 | 1.378(3) | C33-O34  | 1.209(3) |
| N12-C13 | 1.378(3) | C33-O35  | 1.334(2) |
| C13-C14 | 1.392(3) | O35-C36  | 1.456(2) |
| C13-C18 | 1.420(3) | C36-C37  | 1.506(3) |
| C14-C15 | 1.385(3) |          |          |

Table 3: Bond angles (°).

| Atoms       | Angle      | Atoms        | Angle      |
|-------------|------------|--------------|------------|
| C25-C2-C3   | 121.0(2)   | C17-C18-C13  | 118.72(19) |
| C25-C2-Br1  | 120.01(17) | C17-C18-C19  | 134.58(19) |
| C3-C2-Br1   | 118.95(17) | C13-C18-C19  | 106.68(17) |
| C4-C3-C2    | 119.3(2)   | C11-C19-C18  | 106.57(18) |
| C3-C4-C5    | 120.7(2)   | C11-C19-C20  | 121.23(18) |
| O6-C5-C4    | 115.67(19) | C18-C19-C20  | 132.19(18) |
| O6-C5-C24   | 124.4(2)   | C19-C20-C21  | 108.48(16) |
| C4-C5-C24   | 119.9(2)   | N22-C21-C20  | 109.64(16) |
| C5-O6-C7    | 118.03(16) | C23-N22-C21  | 115.14(15) |
| O6-C7-C8    | 108.07(17) | C23-N22-C10  | 100.67(14) |
| C7-C8-C23   | 109.03(16) | C21-N22-C10  | 114.62(15) |
| C7-C8-C9    | 120.24(17) | N22-C23-C24  | 120.64(17) |
| C23-C8-C9   | 101.80(16) | N22-C23-C8   | 104.31(15) |
| C33-C9-C8   | 111.98(16) | C24-C23-C8   | 110.13(16) |
| C33-C9-C10  | 114.35(15) | C25-C24-C5   | 118.84(19) |
| C8-C9-C10   | 102.51(15) | C25-C24-C23  | 123.36(19) |
| N22-C10-C11 | 109.88(16) | C5-C24-C23   | 117.67(18) |
| N22-C10-C26 | 107.57(15) | C2-C25-C24   | 120.1(2)   |
| C11-C10-C26 | 105.35(15) | C31-C26-C27  | 118.56(18) |
| N22-C10-C9  | 106.39(15) | C31-C26-C10  | 123.30(17) |
| C11-C10-C9  | 115.43(15) | C27-C26-C10  | 117.75(17) |
| C26-C10-C9  | 112.01(15) | C28-C27-C26  | 121.25(19) |
| C19-C11-N12 | 110.83(17) | C27-C28-C29  | 119.01(19) |
| C19-C11-C10 | 125.37(18) | C30-C29-C28  | 120.90(18) |
| N12-C11-C10 | 123.40(17) | C30-C29-C132 | 120.10(16) |
| C11-N12-C13 | 108.13(16) | C28-C29-C132 | 118.99(16) |
| N12-C13-C14 | 129.87(19) | C29-C30-C31  | 119.46(19) |
| N12-C13-C18 | 107.78(17) | C26-C31-C30  | 120.78(19) |
| C14-C13-C18 | 122.35(19) | O34-C33-O35  | 123.99(18) |
| C15-C14-C13 | 117.6(2)   | O34-C33-C9   | 124.55(18) |
| C14-C15-C16 | 121.1(2)   | O35-C33-C9   | 111.45(16) |
| C17-C16-C15 | 121.2(2)   | C33-O35-C36  | 118.01(15) |
| C16-C17-C18 | 119.00(19) | O35-C36-C37  | 110.88(16) |

<sup>1</sup>H NMR of **3a** in CDCl<sub>3</sub>

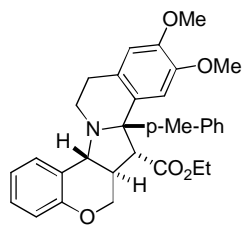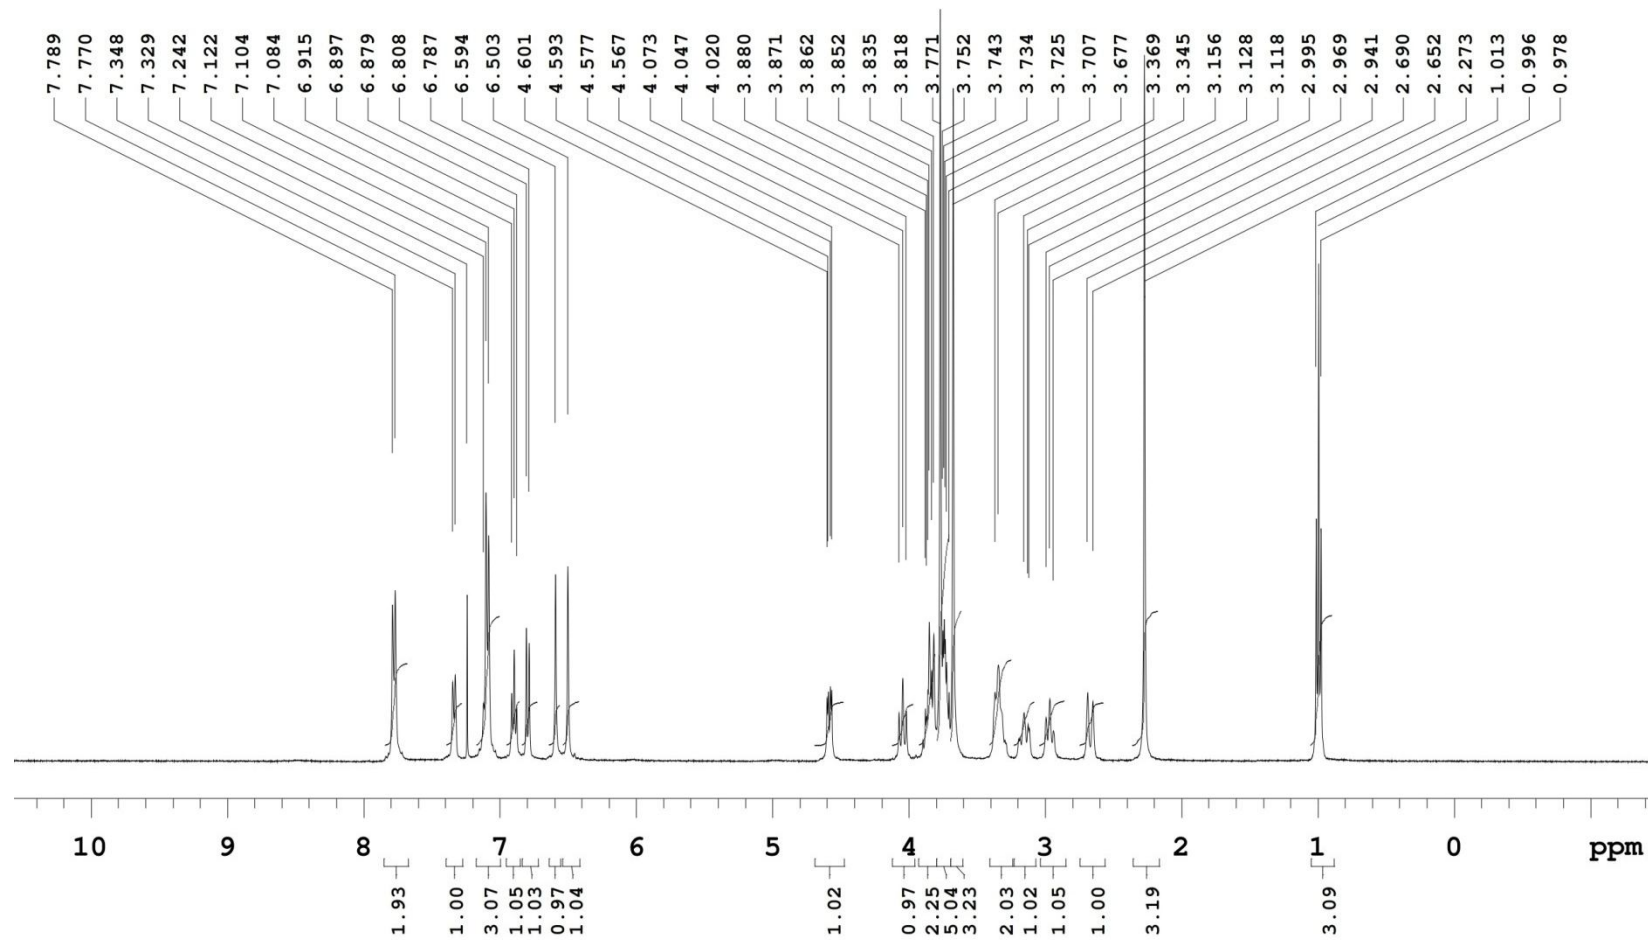

<sup>13</sup>C NMR of **3a** in CDCl<sub>3</sub>

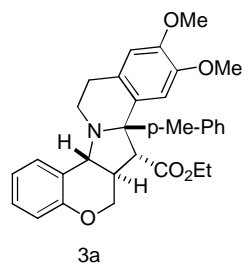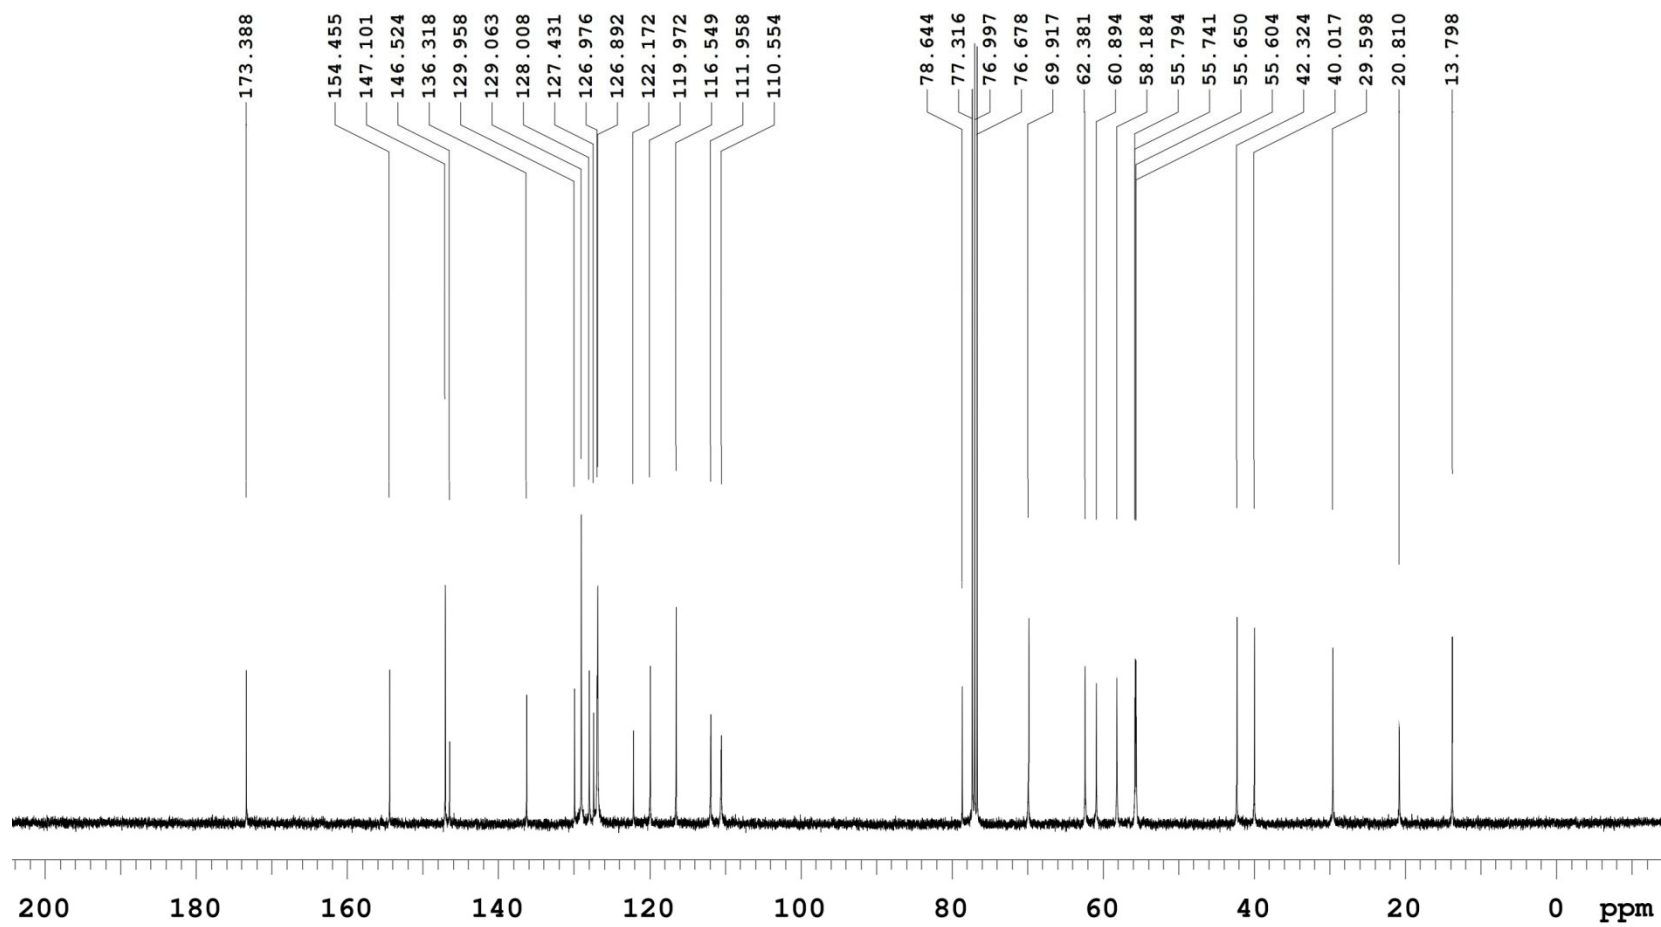

$^1\text{H}$  NMR of **3b** in  $\text{CDCl}_3$

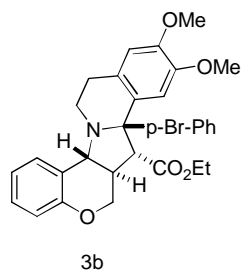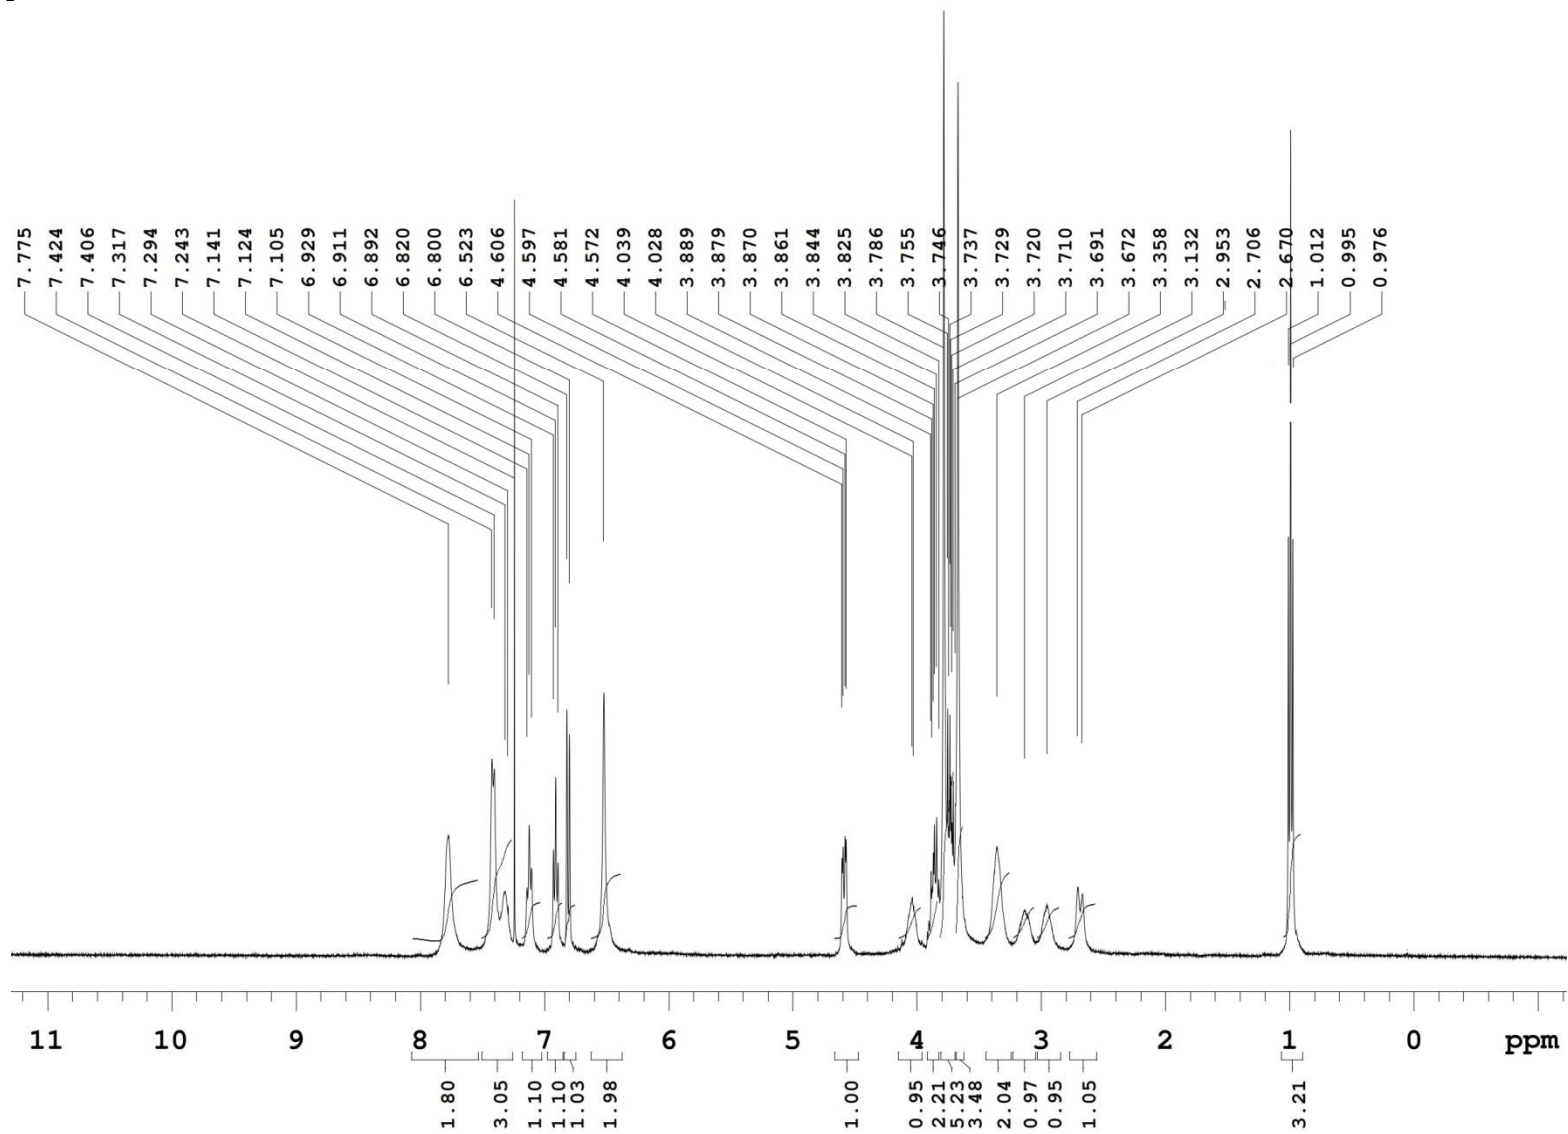

$^{13}\text{C}$  NMR of **3b** in  $\text{CDCl}_3$

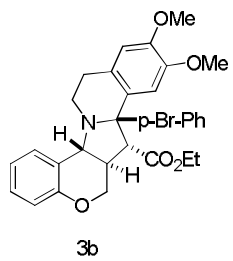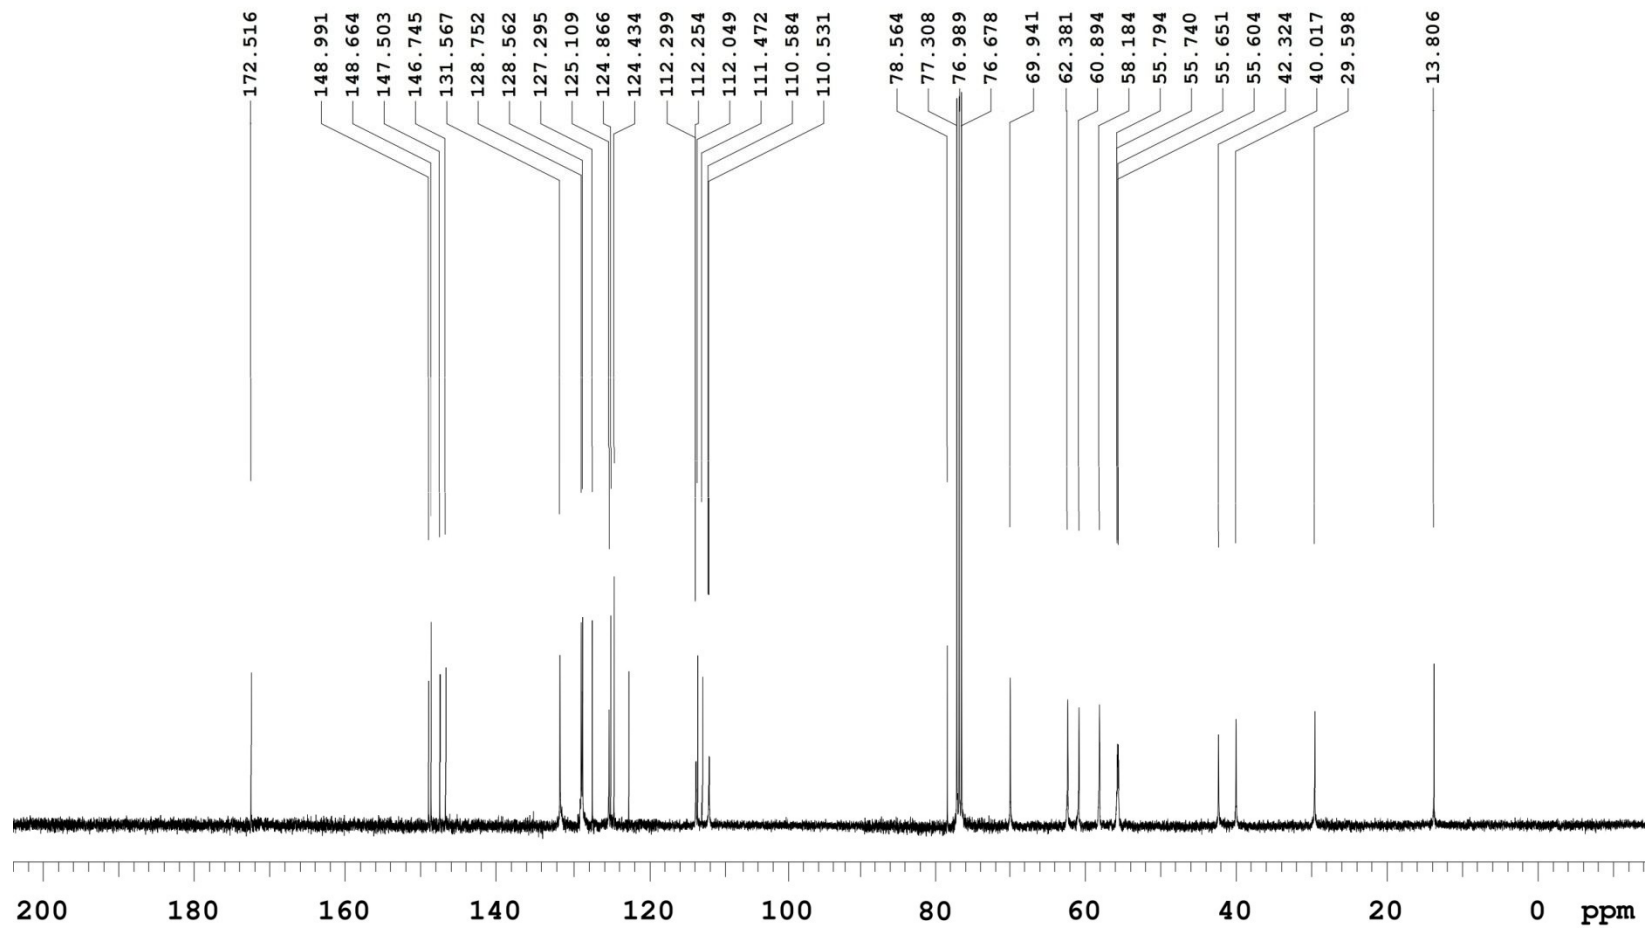



<sup>1</sup>H NMR of **3c** in CDCl<sub>3</sub>

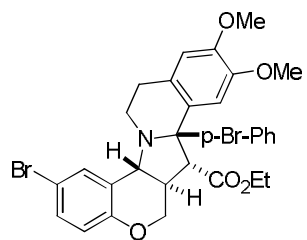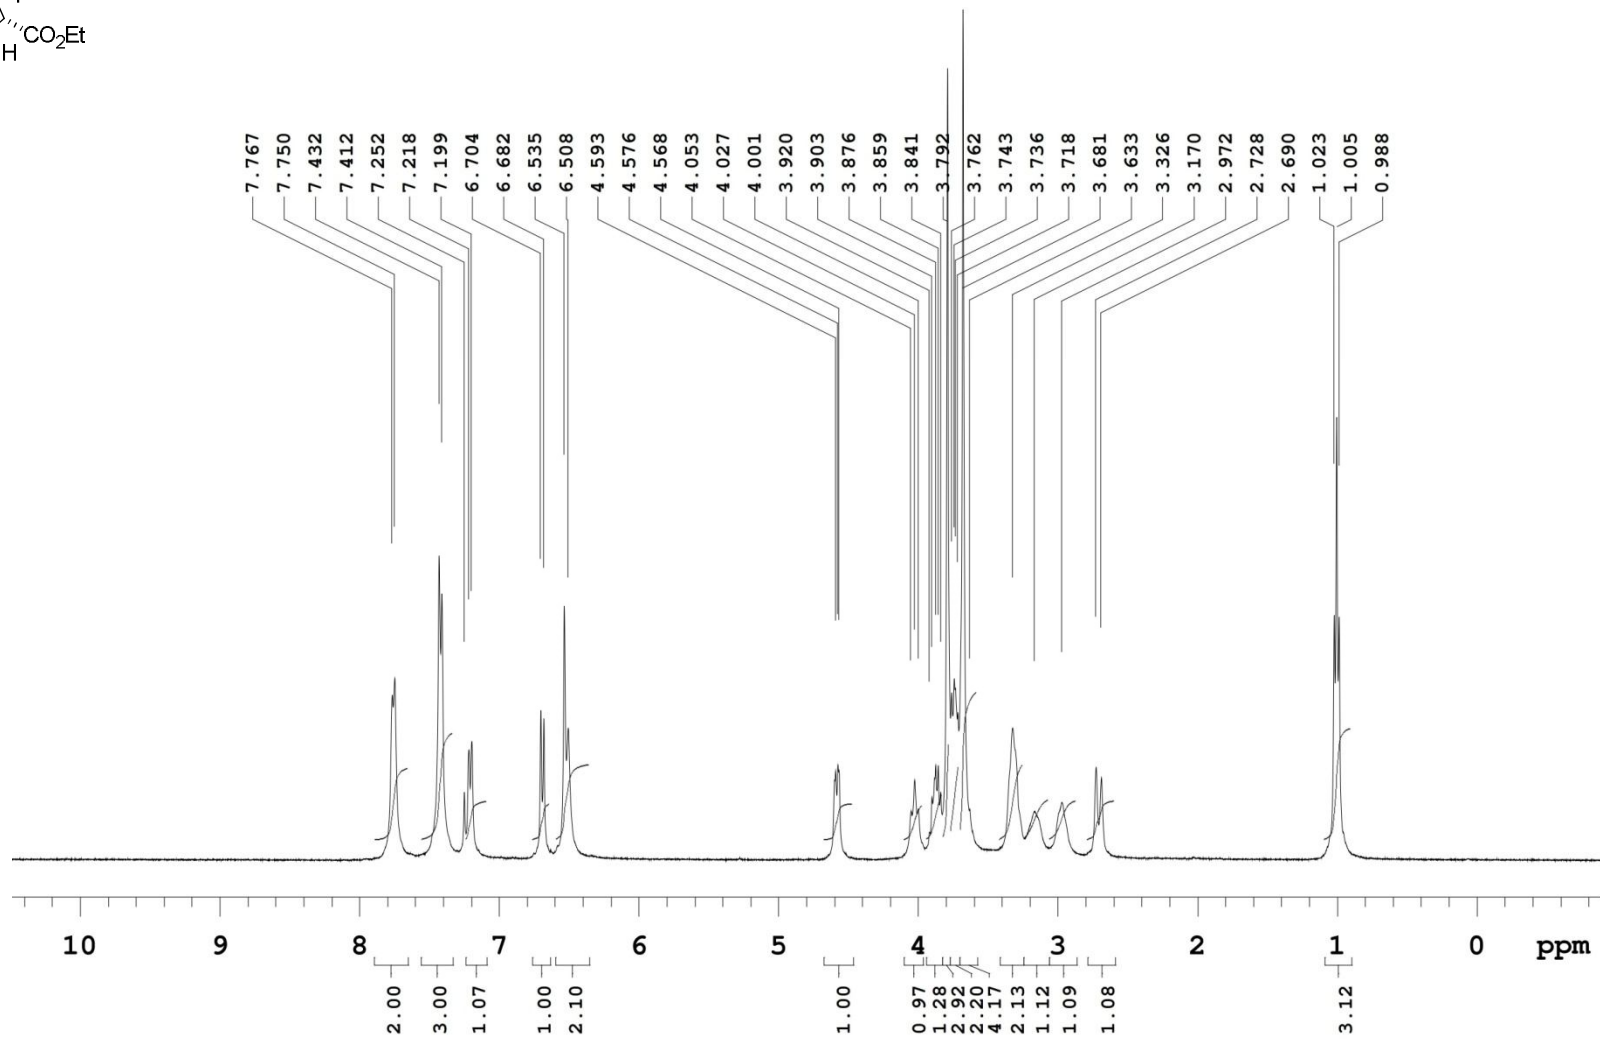

<sup>13</sup>C NMR of 3c in CDCl<sub>3</sub>

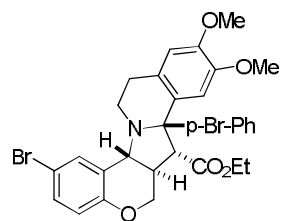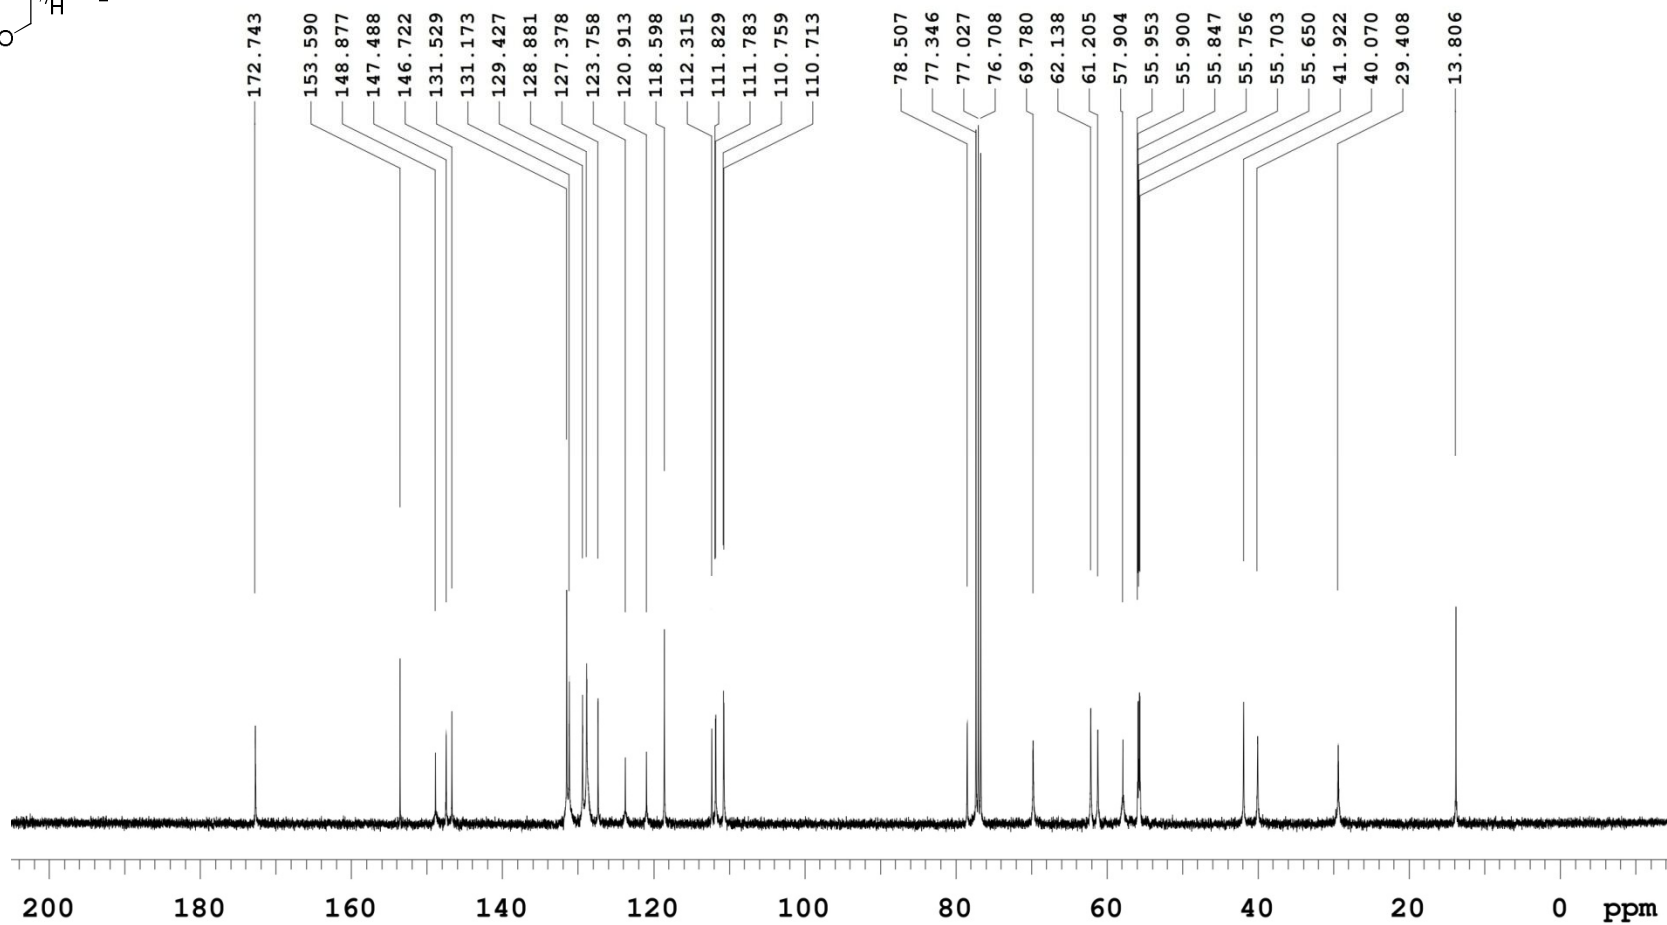

ORTEP diagram of **3c**

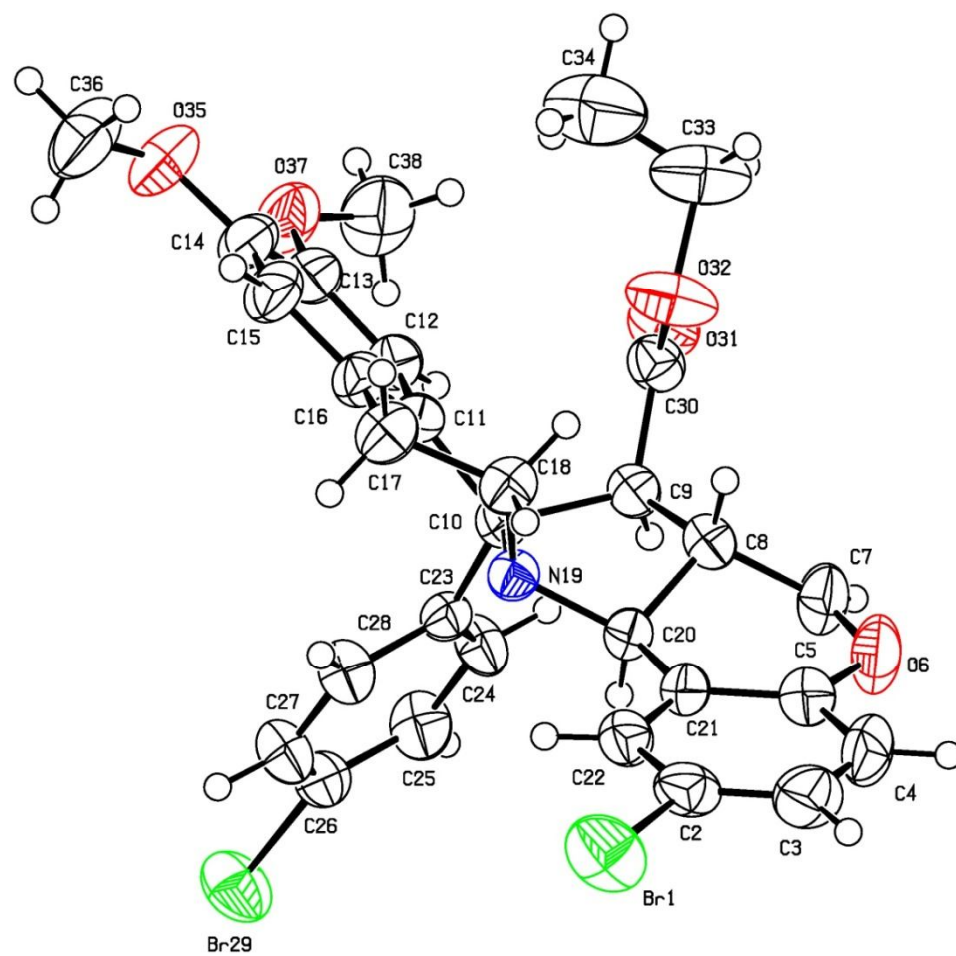

$^1\text{H}$  NMR of **3d** in  $\text{CDCl}_3$

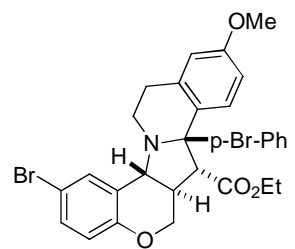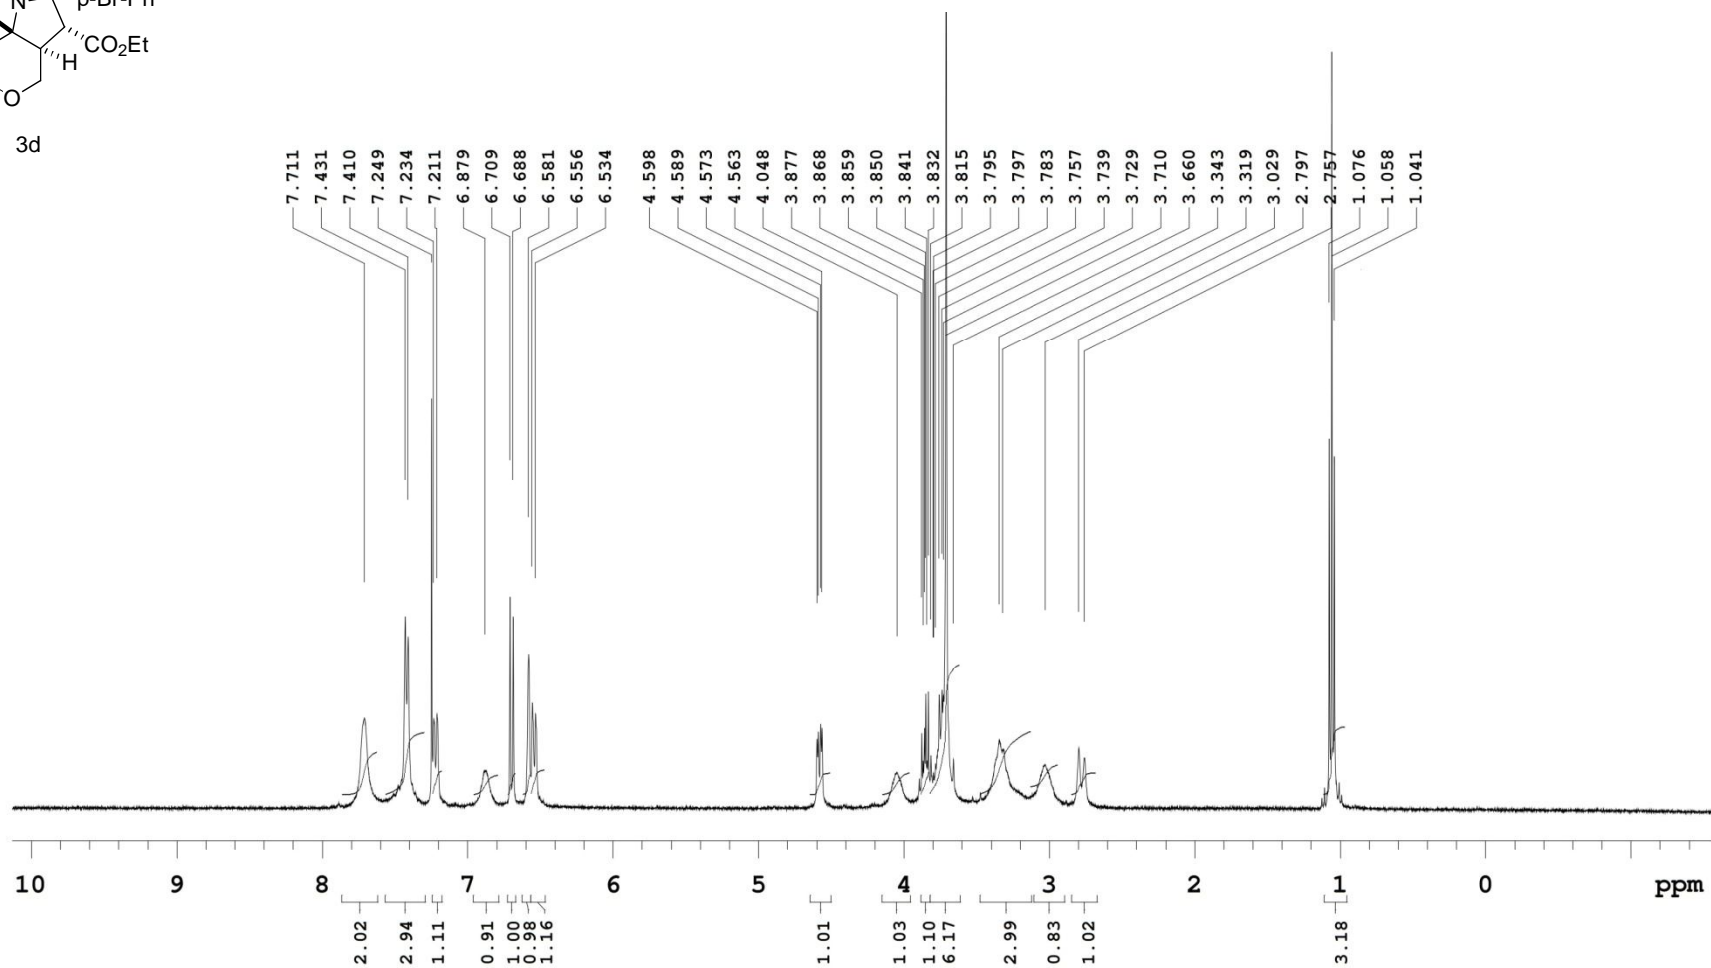

<sup>13</sup>C NMR of **3d** in CDCl<sub>3</sub>

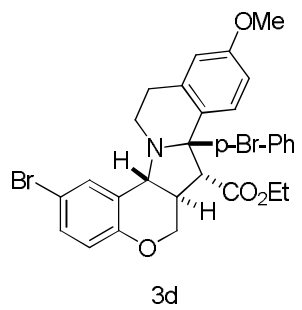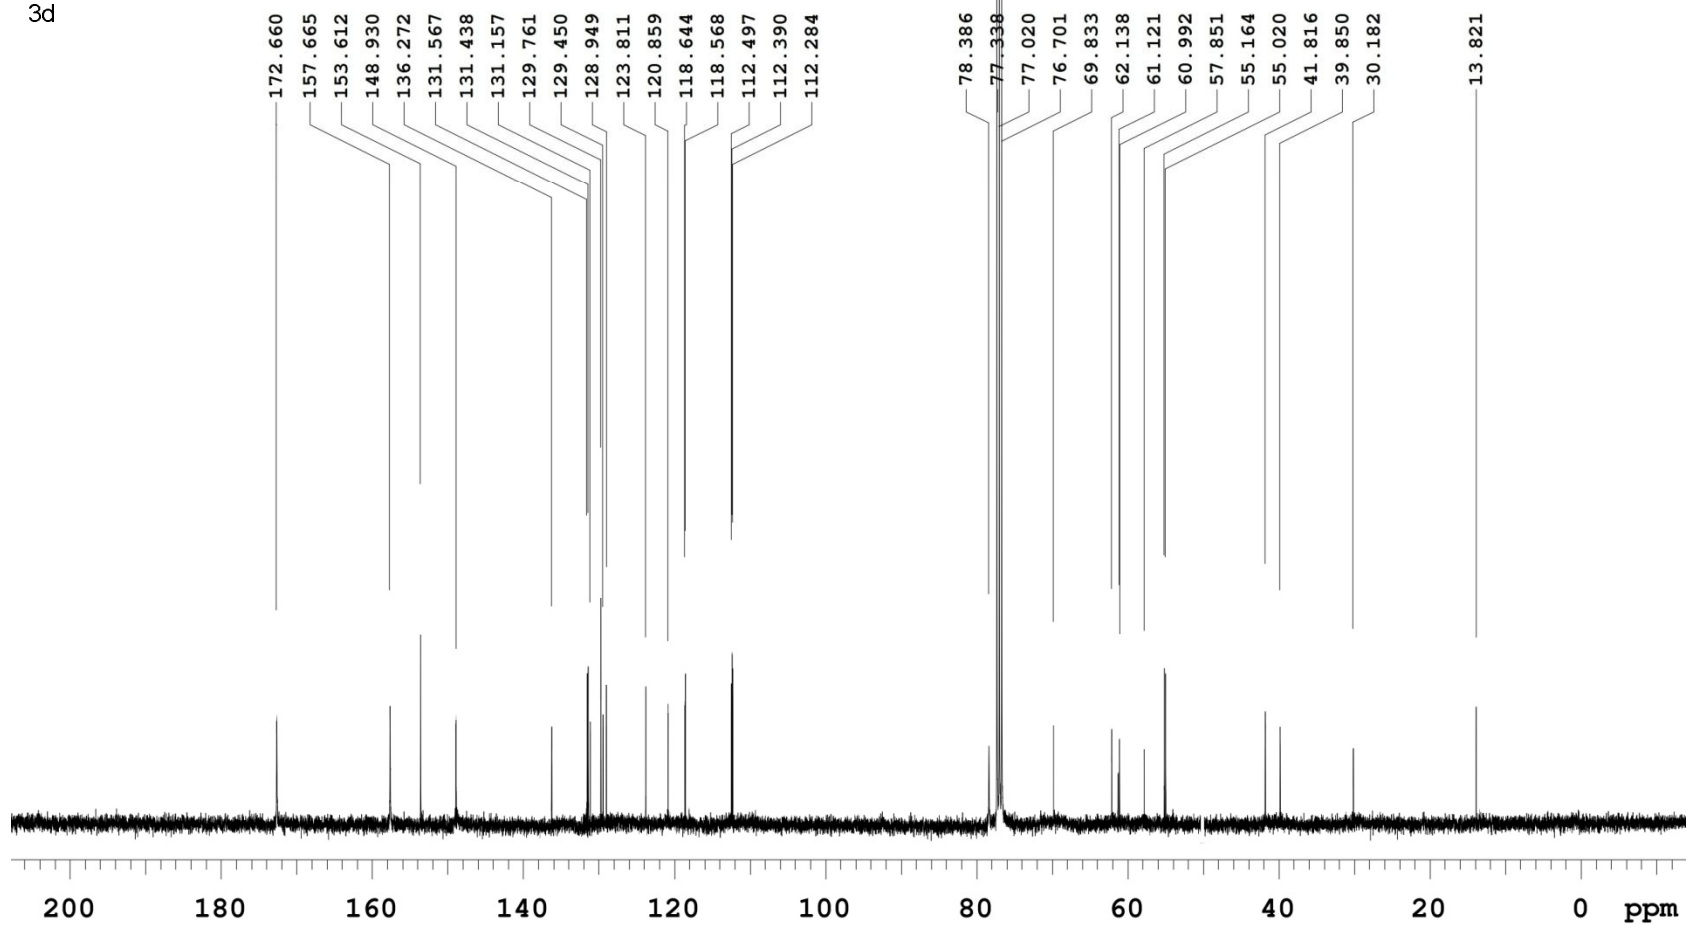

<sup>1</sup>H NMR of **3e** in CDCl<sub>3</sub>

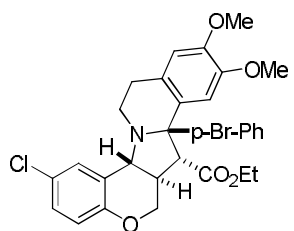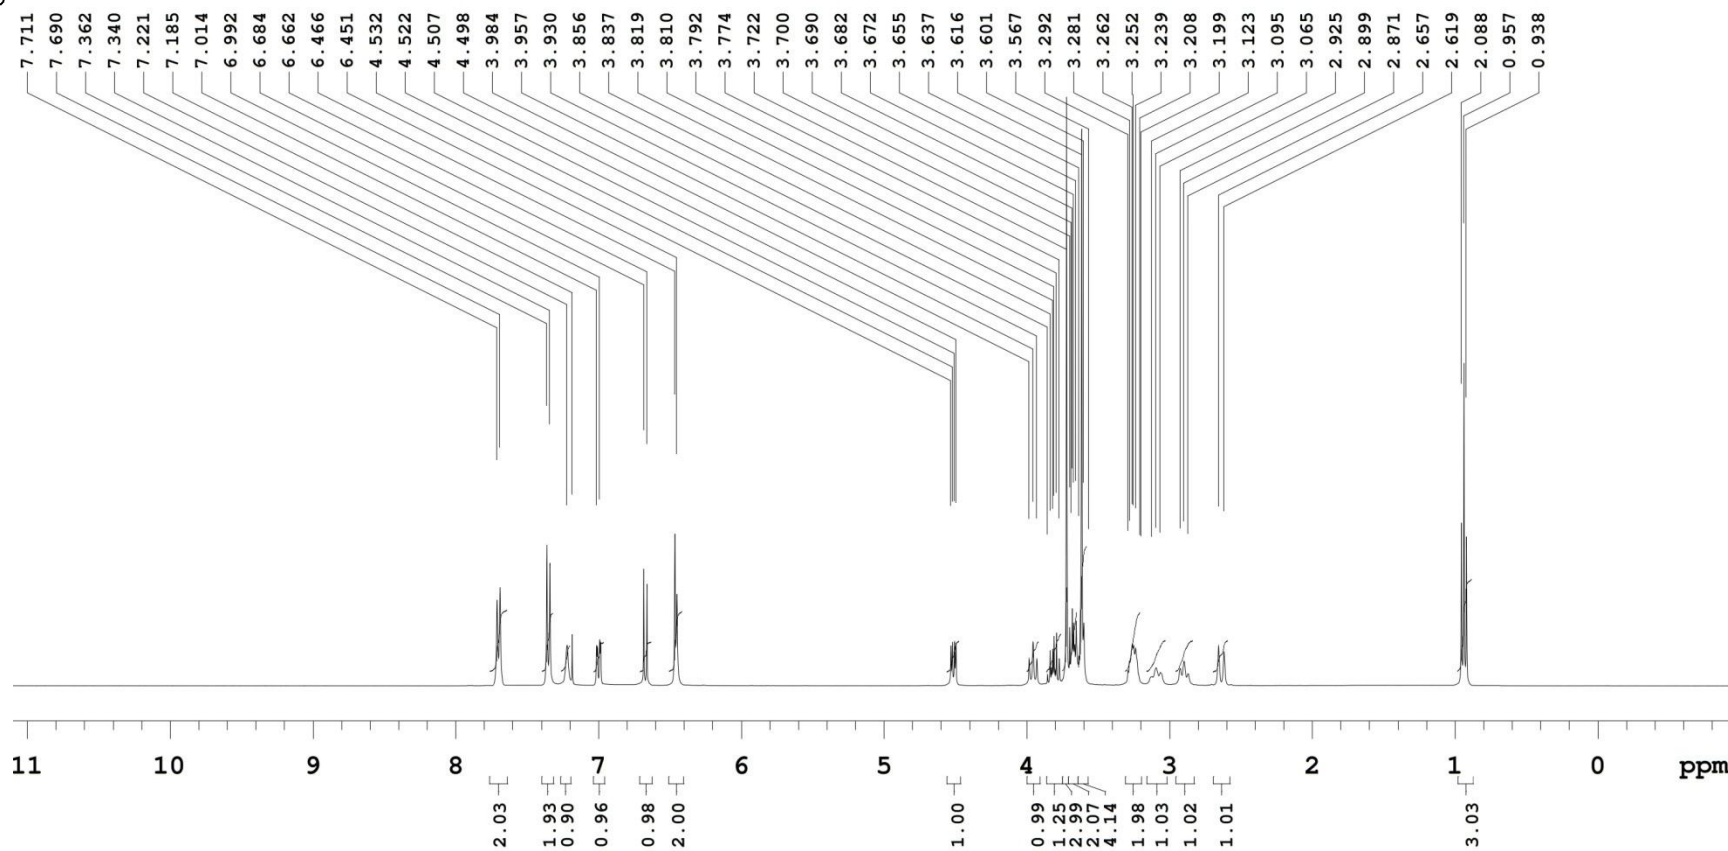

<sup>13</sup>C NMR of **3e** in CDCl<sub>3</sub>

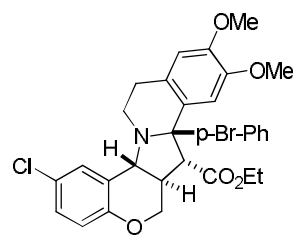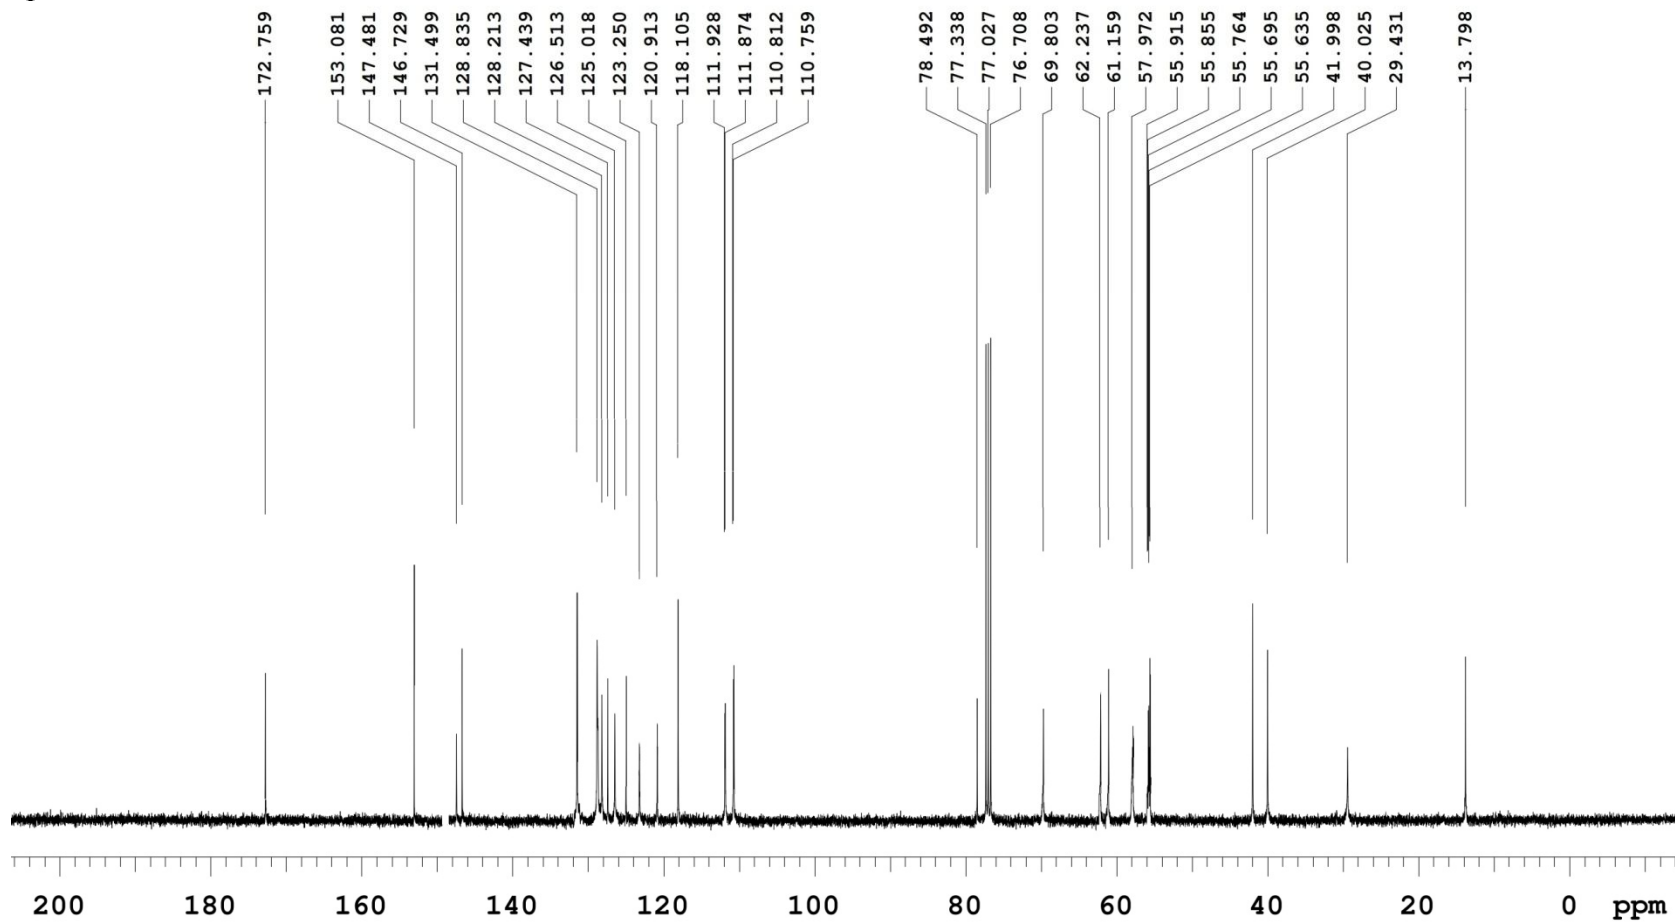

$^1\text{H}$  NMR of **3f** in  $\text{CDCl}_3$

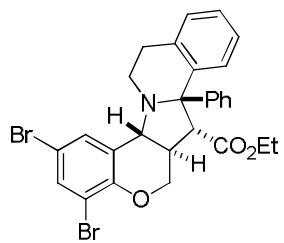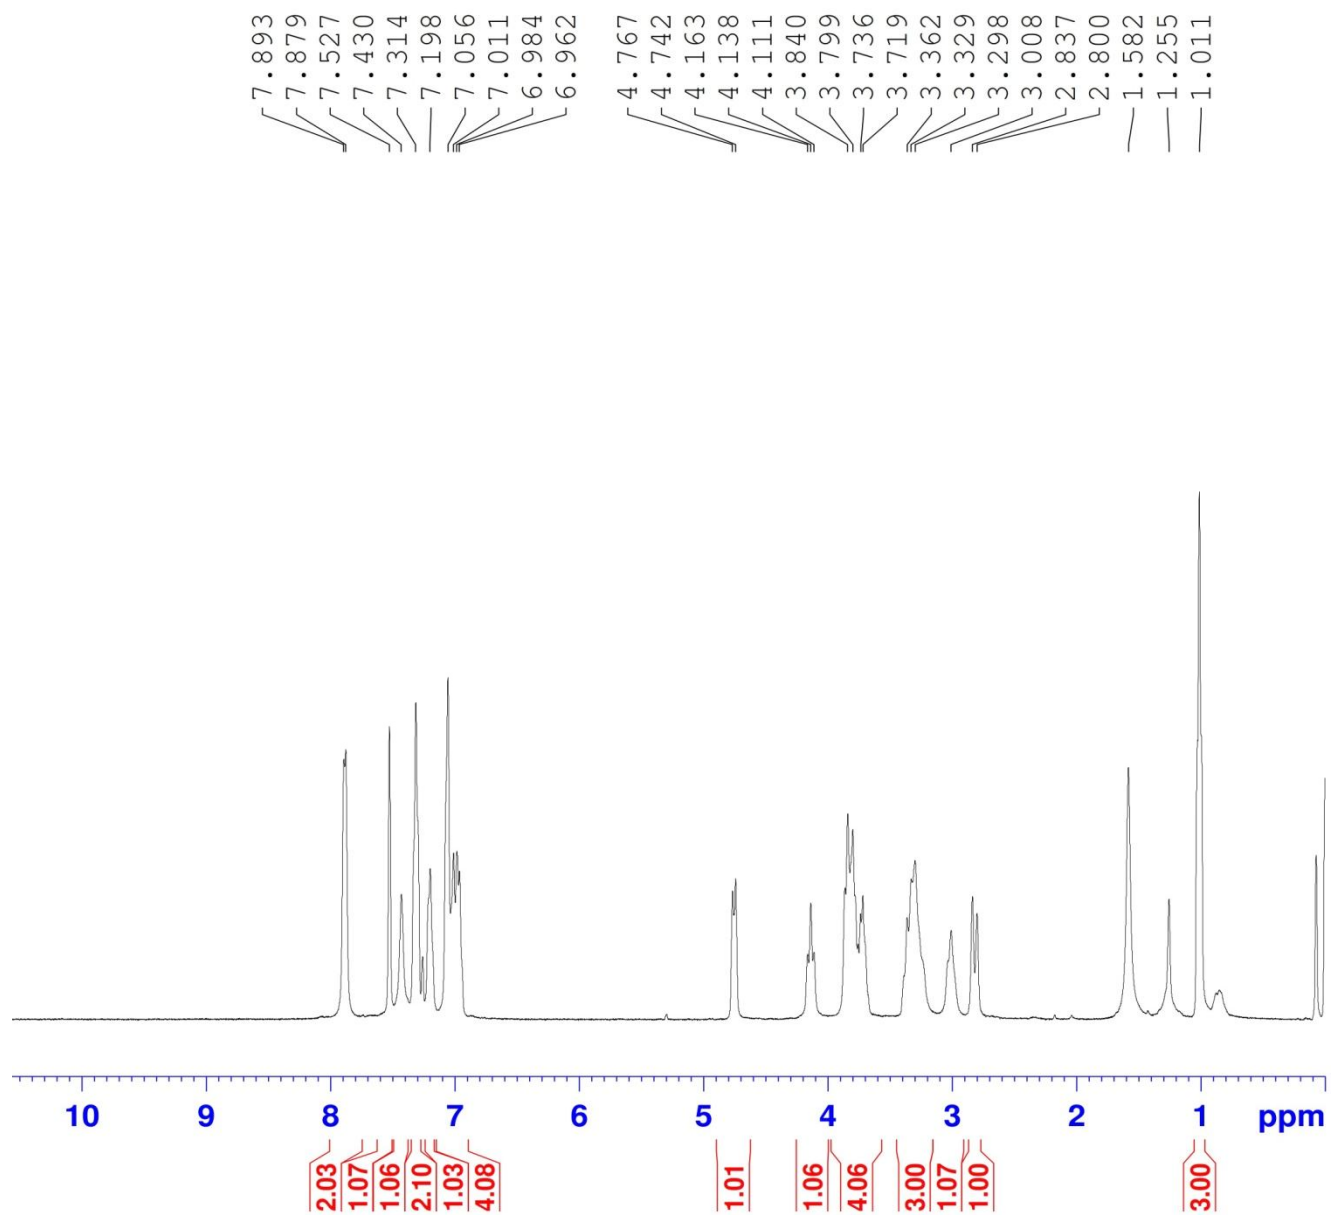



$^{13}\text{C}$  NMR of **3f** in  $\text{CDCl}_3$

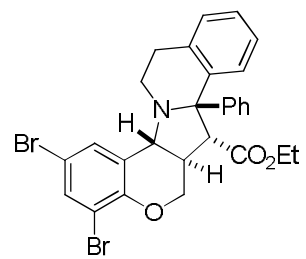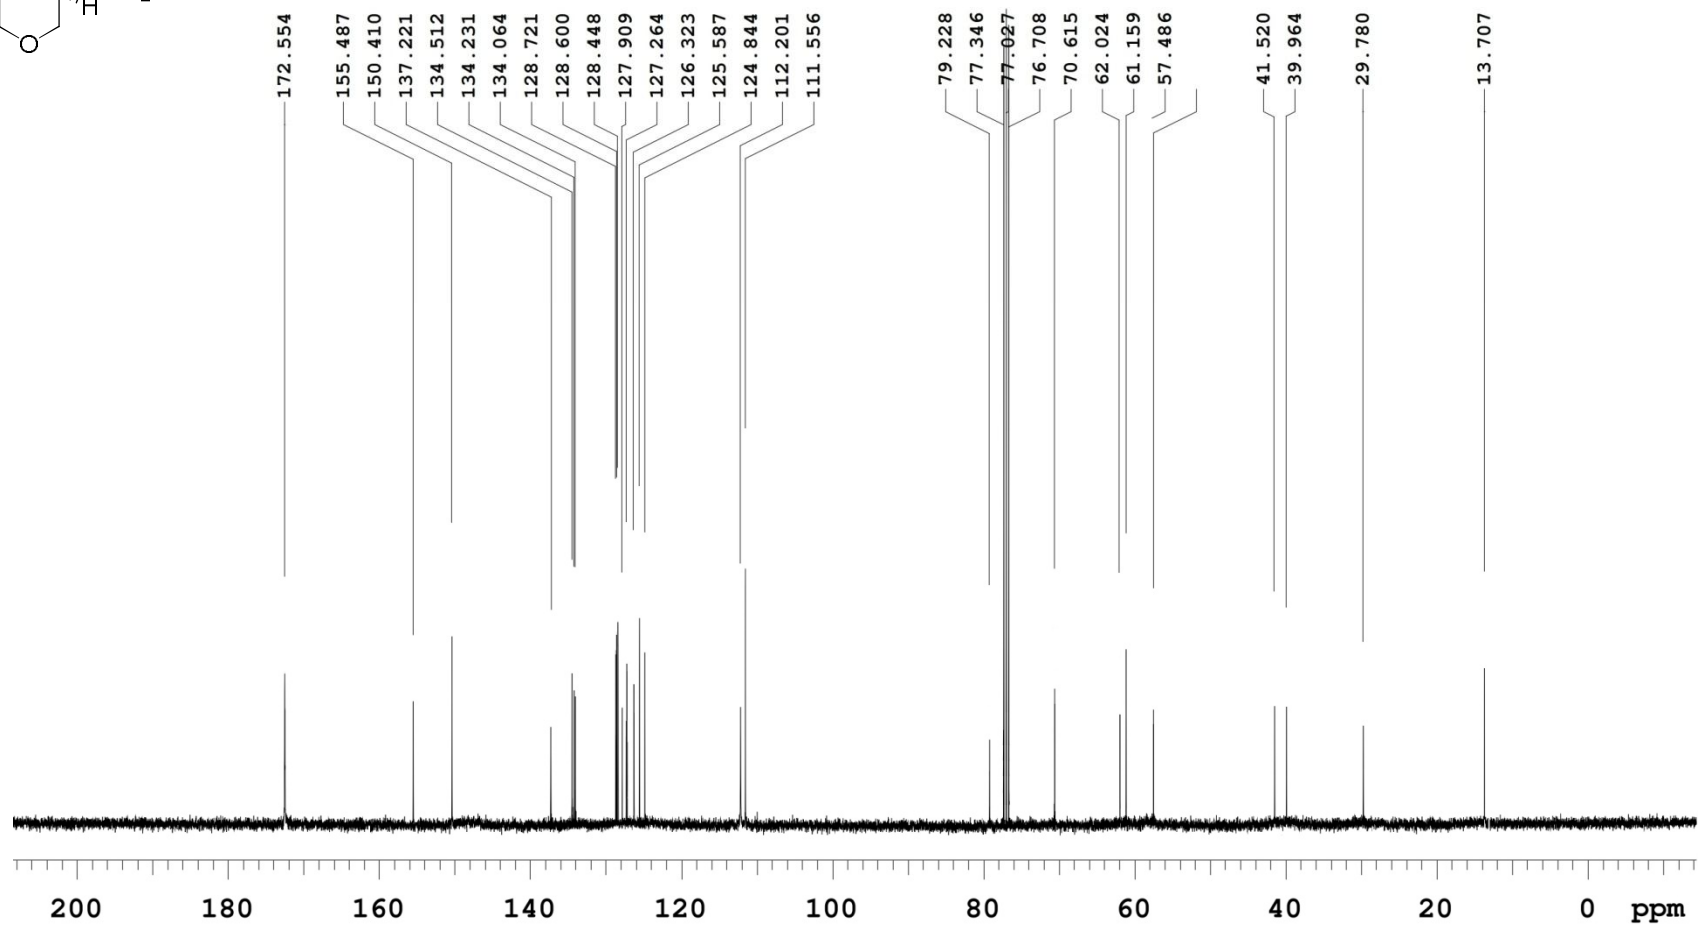

<sup>1</sup>H NMR of 3g in CDCl<sub>3</sub>

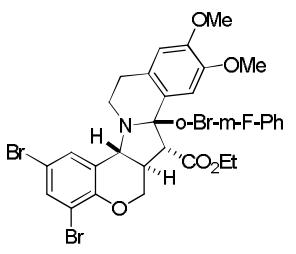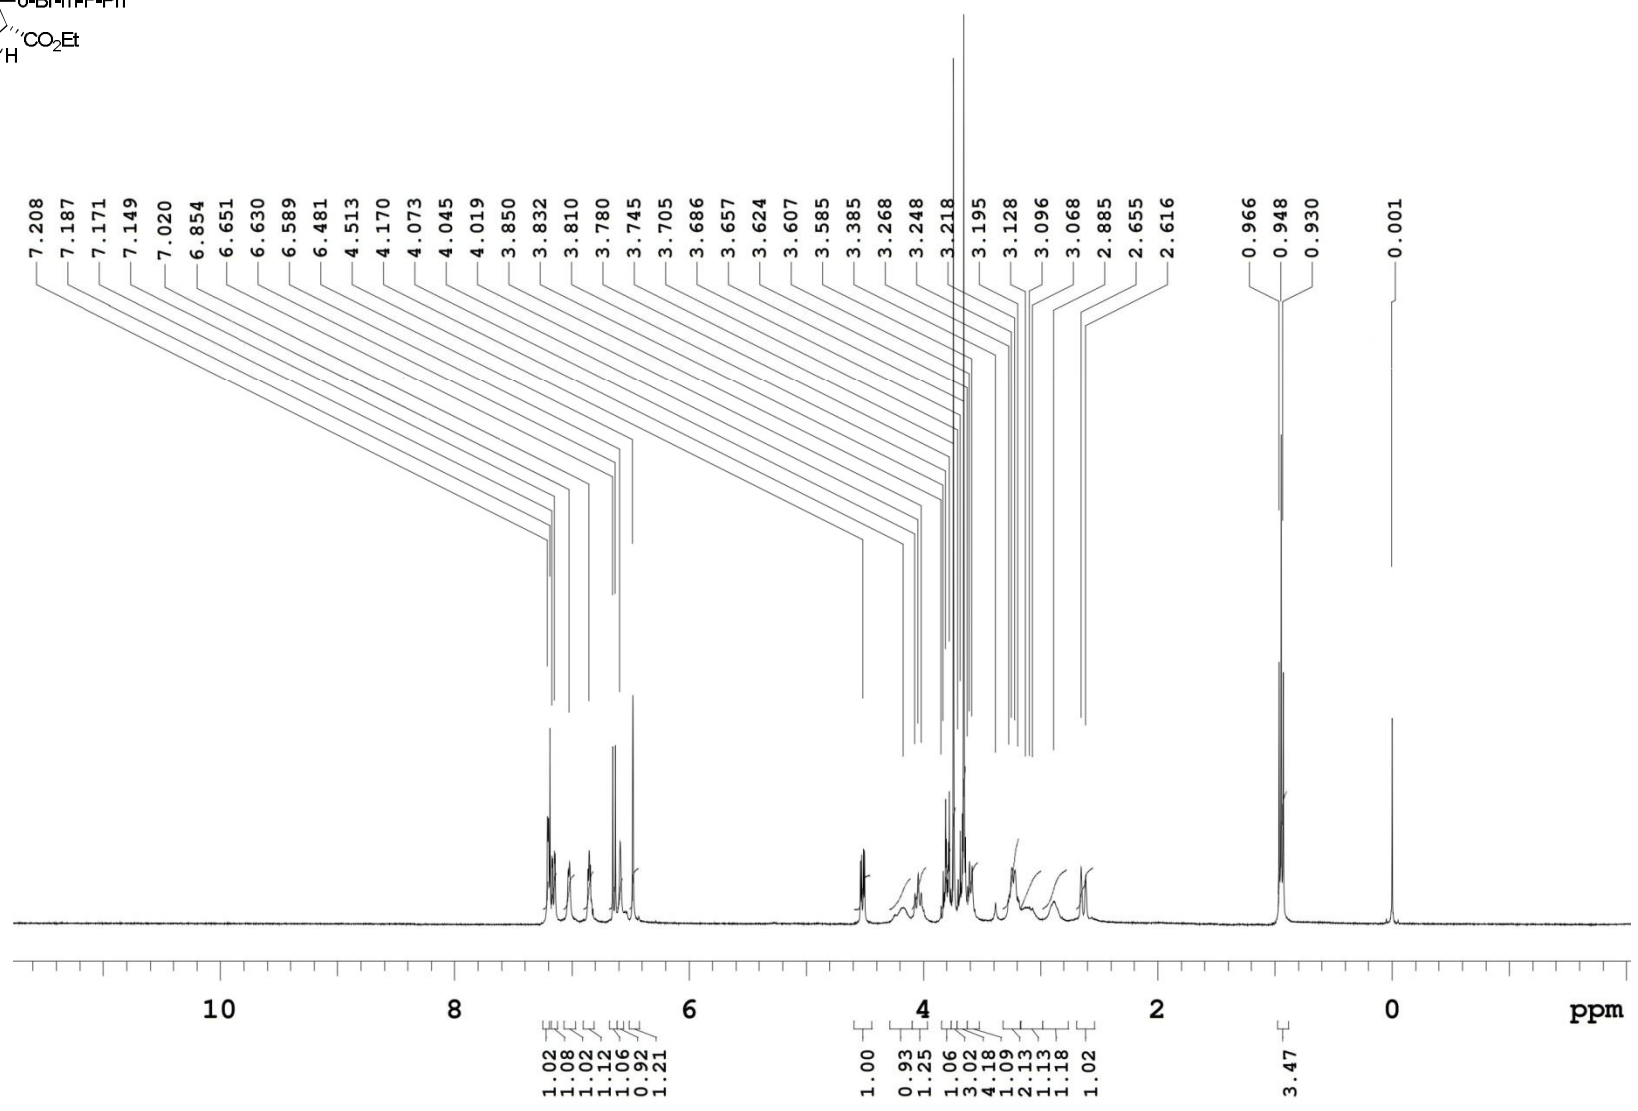

$^{13}\text{C}$  NMR of **3g** in  $\text{CDCl}_3$

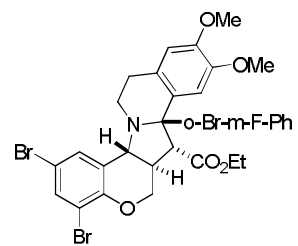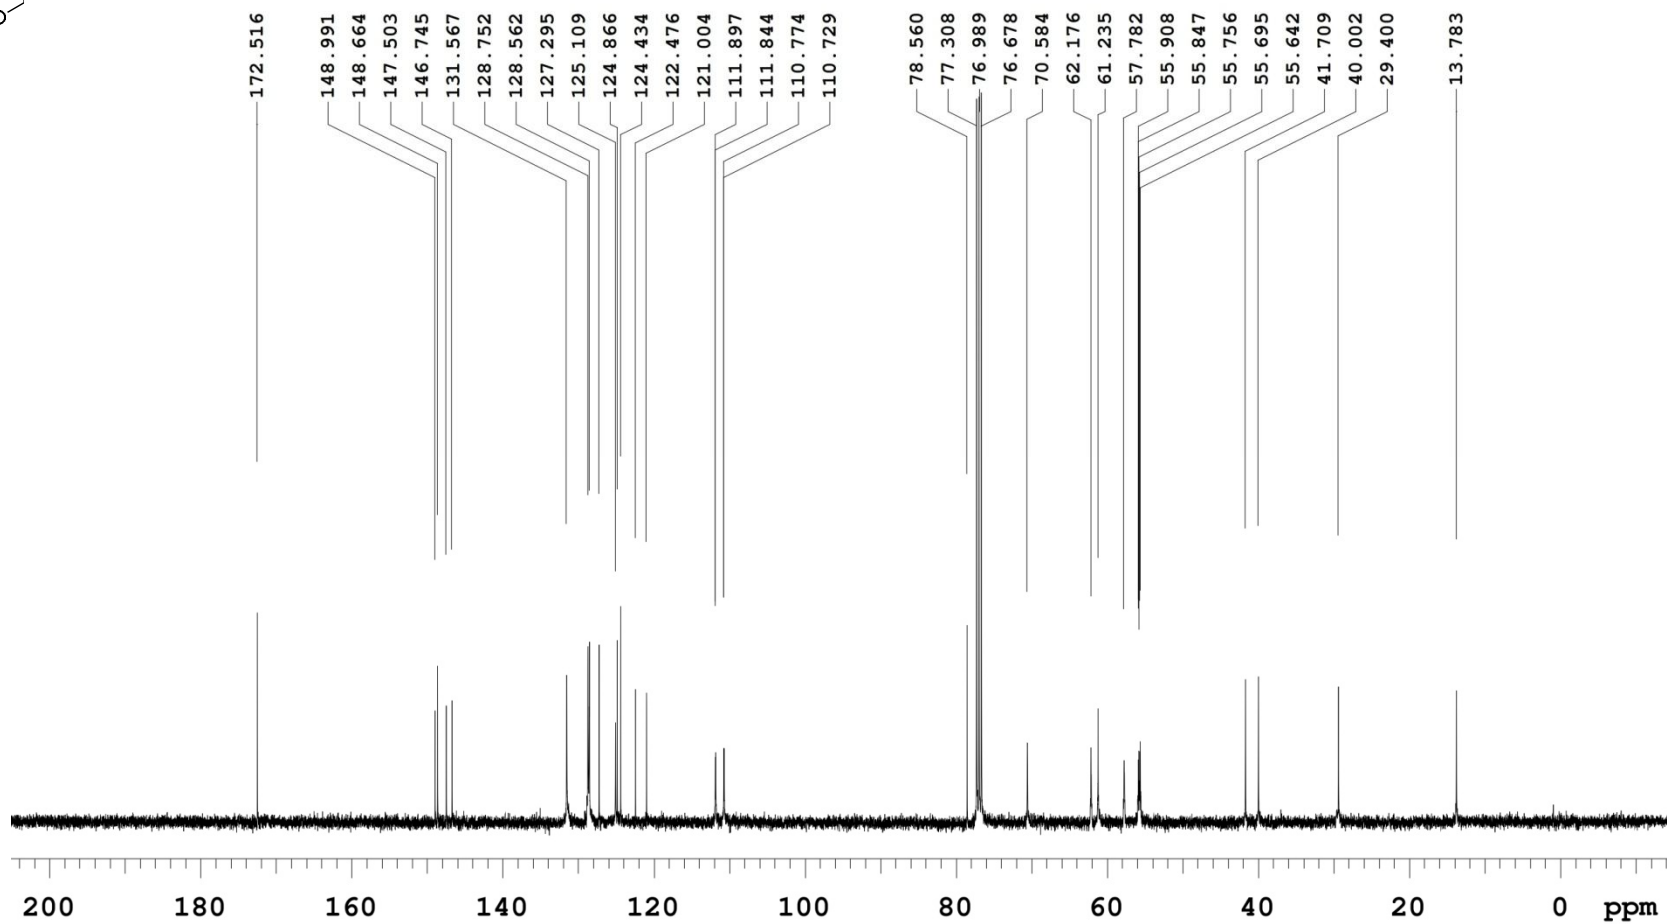

<sup>1</sup>H NMR of **3h** in CDCl<sub>3</sub>

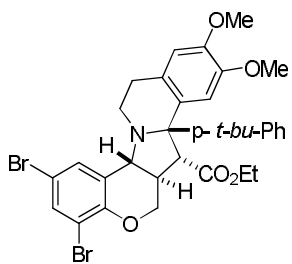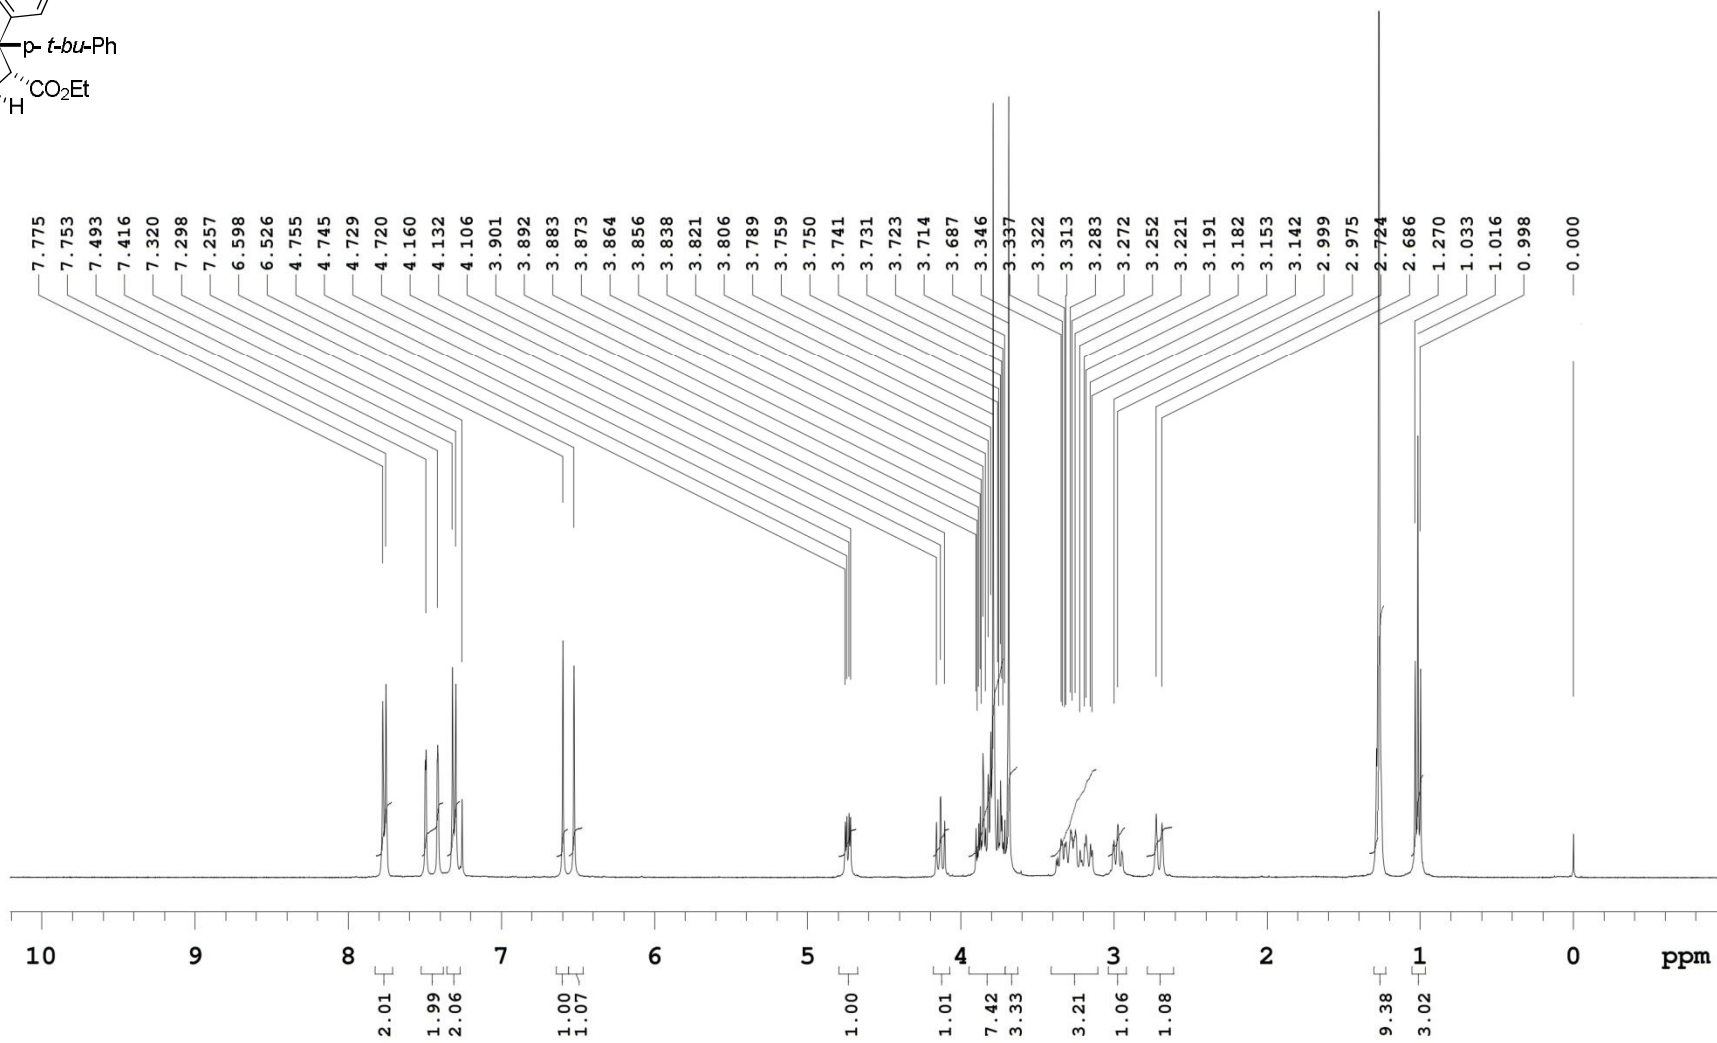

<sup>13</sup>C NMR of 3hin CDCl<sub>3</sub>

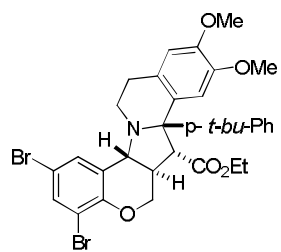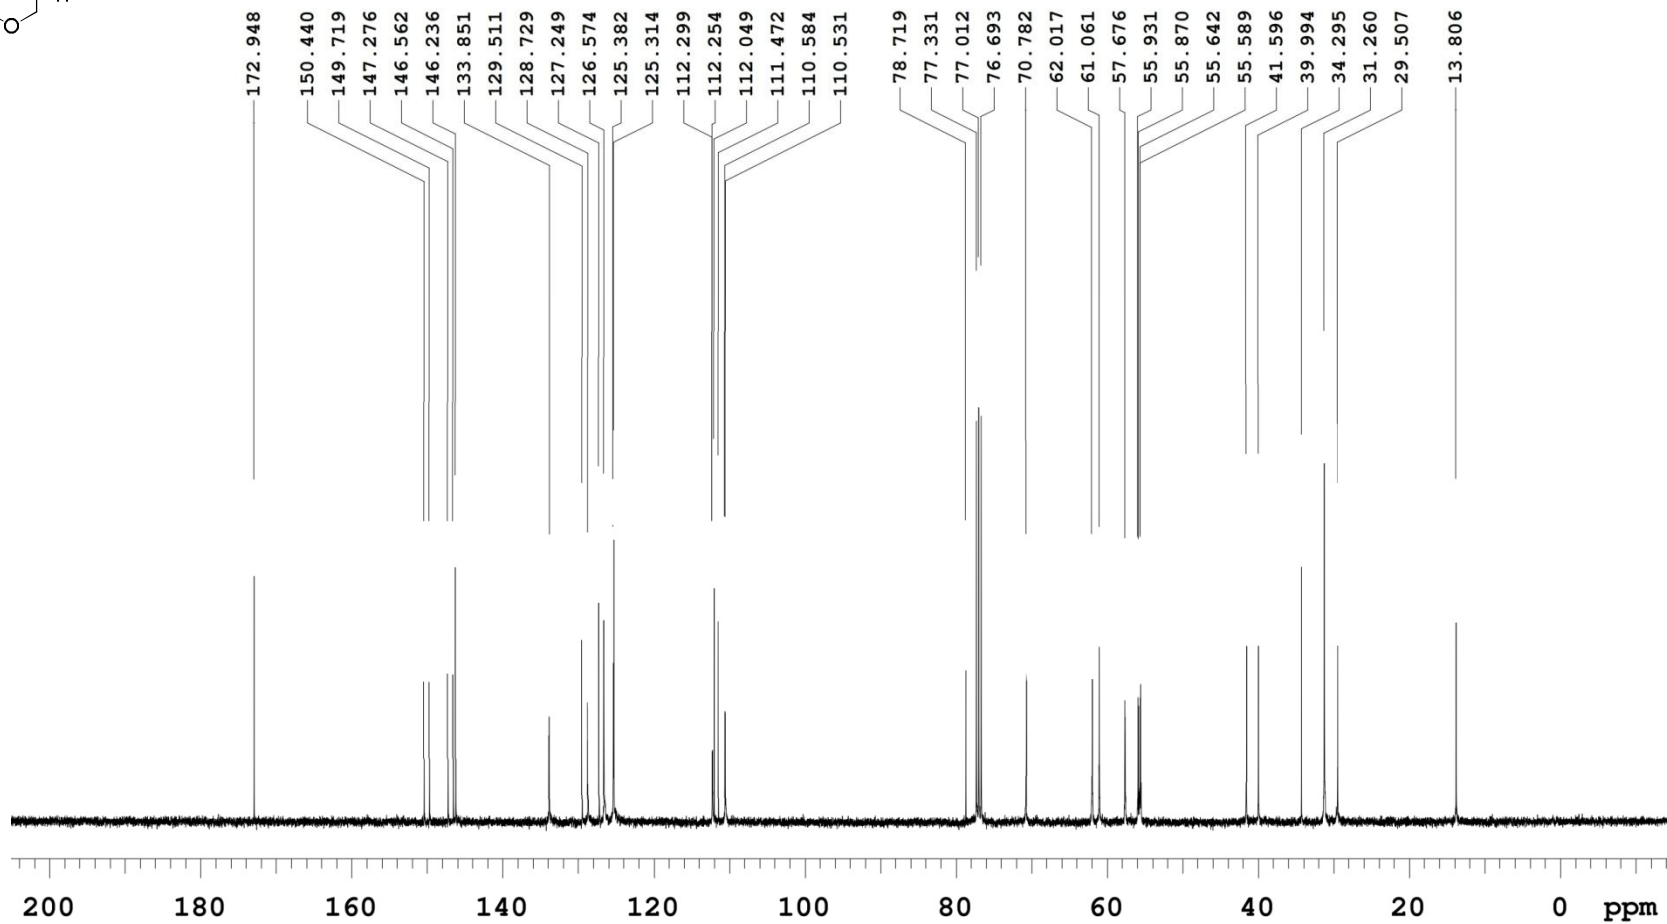

<sup>1</sup>H NMR of **3i** in CDCl<sub>3</sub>

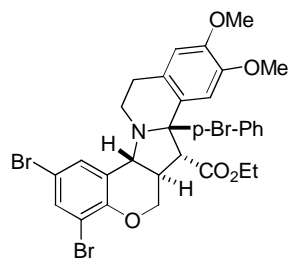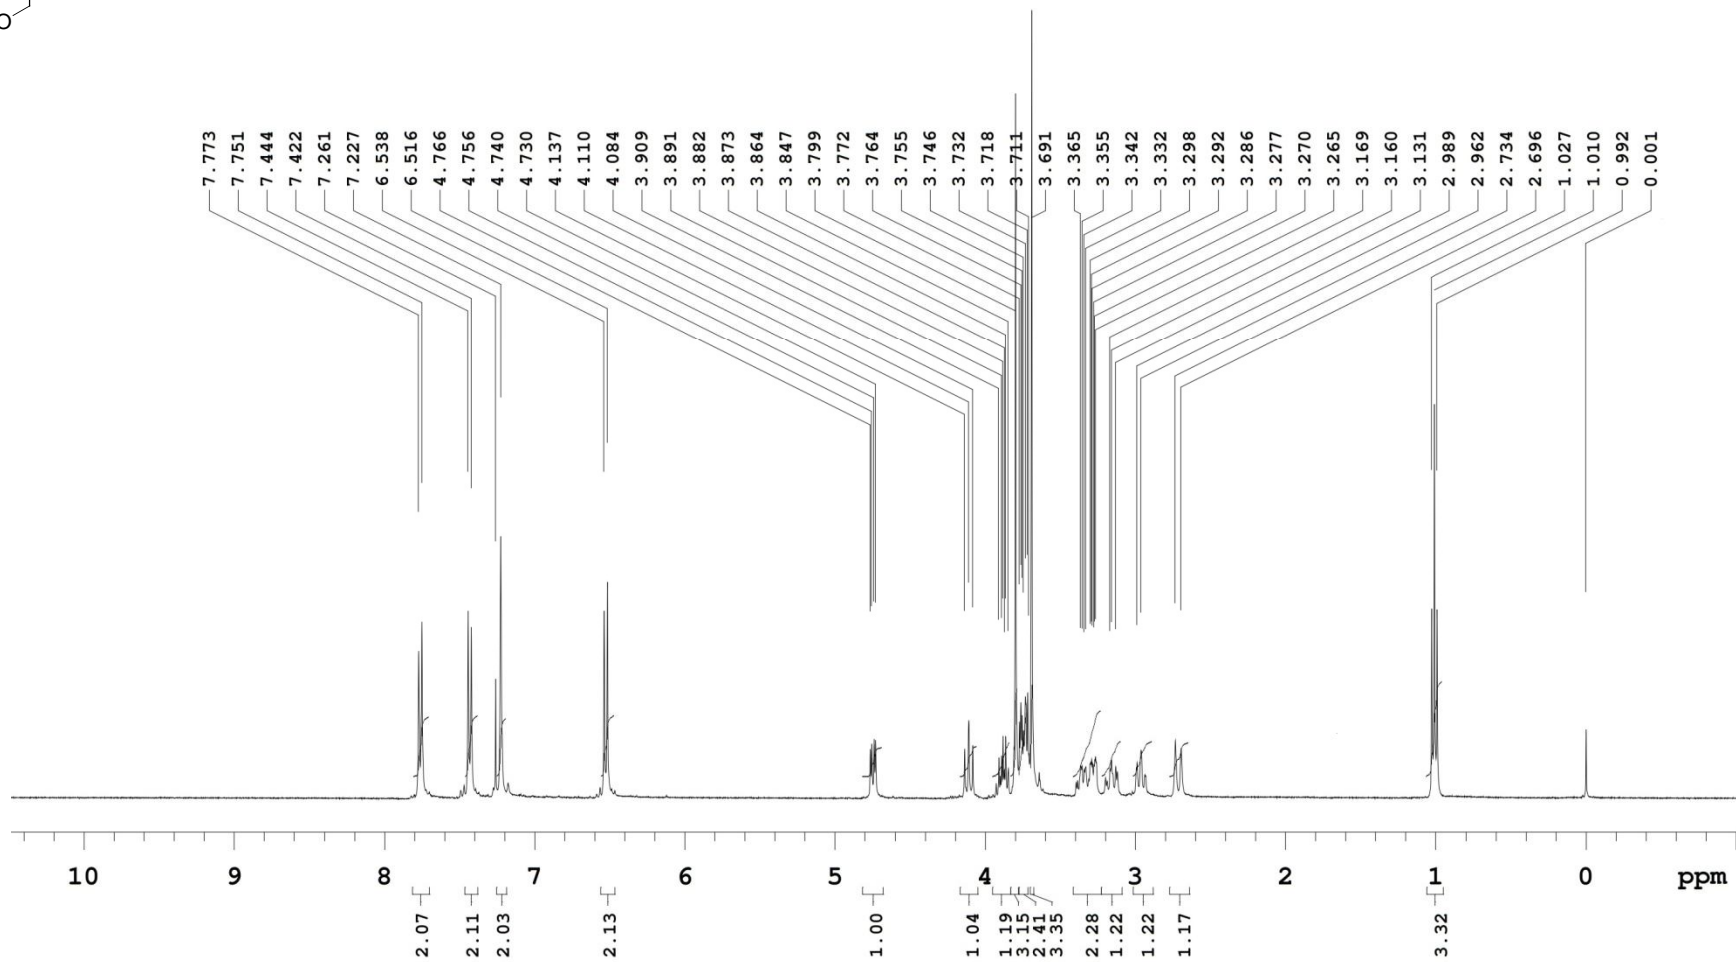

$^{13}\text{C}$  NMR of **3i** in  $\text{CDCl}_3$

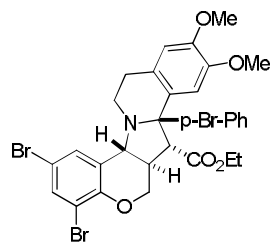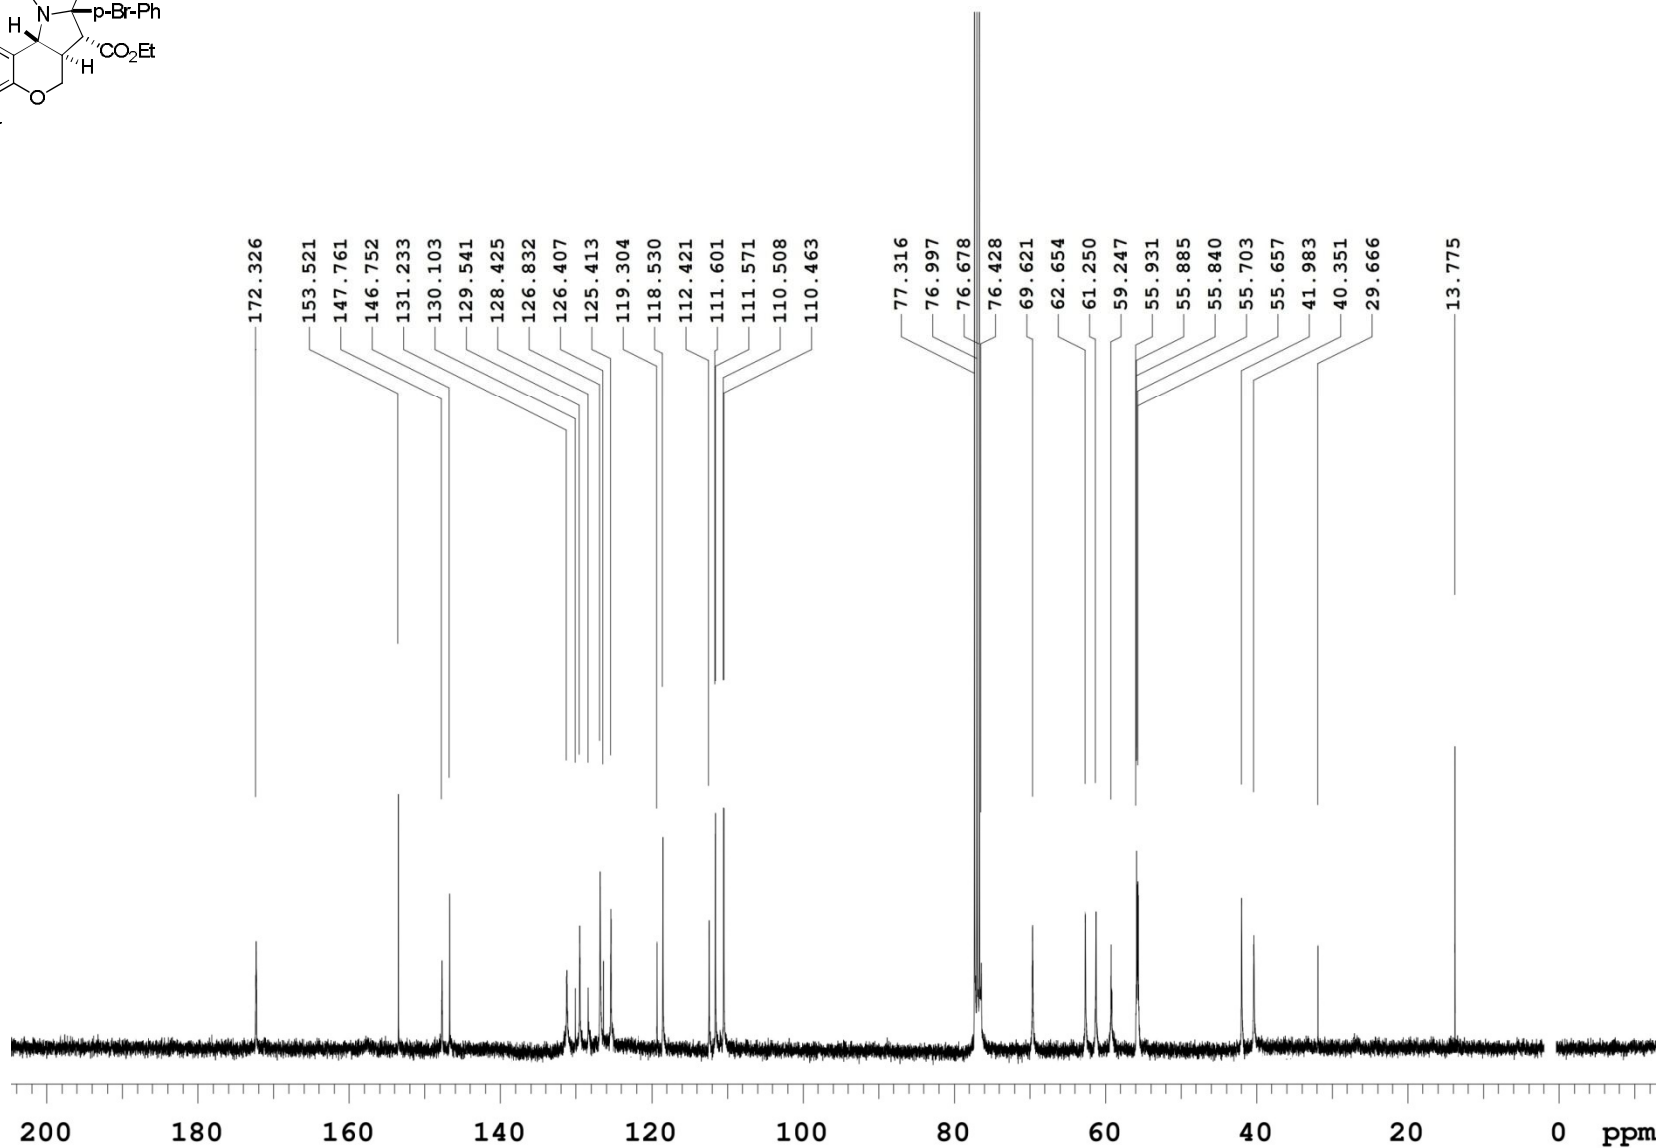

<sup>1</sup>H NMR of **3j** in CDCl<sub>3</sub>

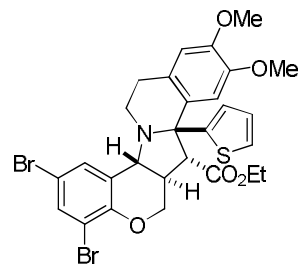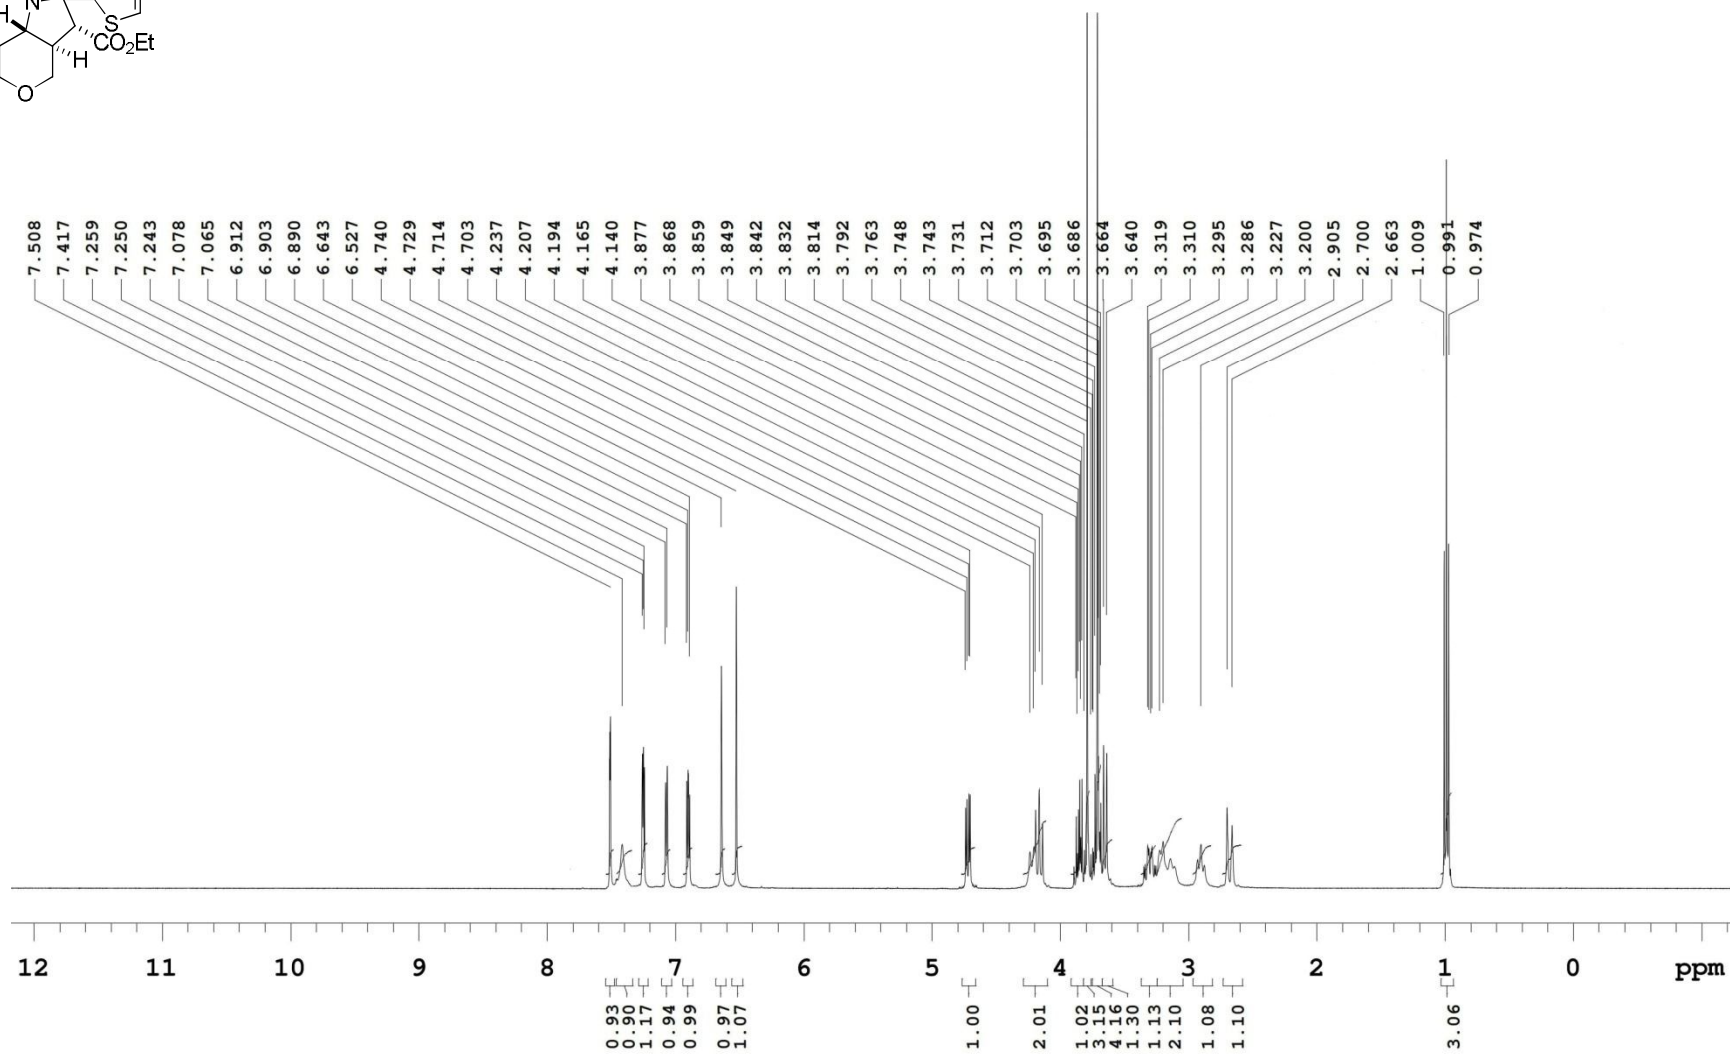



<sup>13</sup>C NMR of **3j** in CDCl<sub>3</sub>

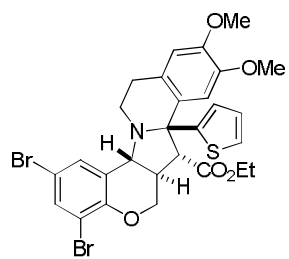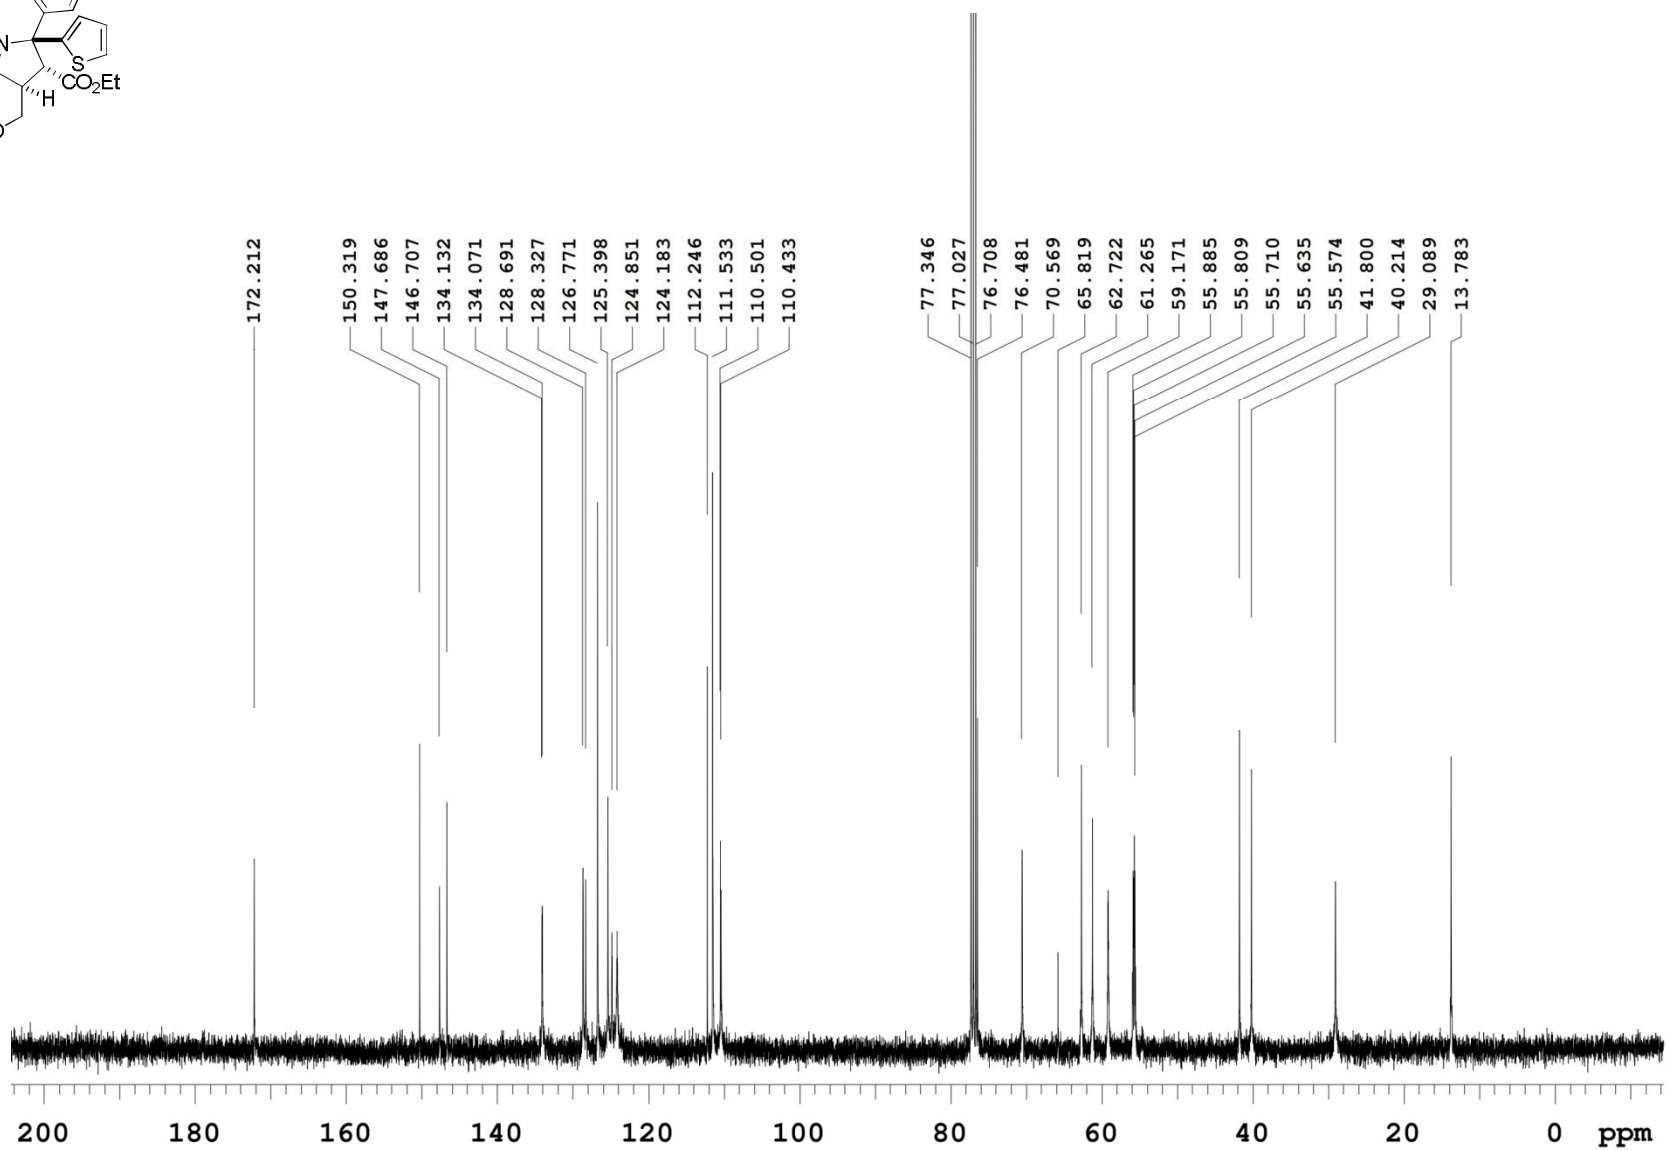

<sup>1</sup>H NMR of **3k** in CDCl<sub>3</sub>

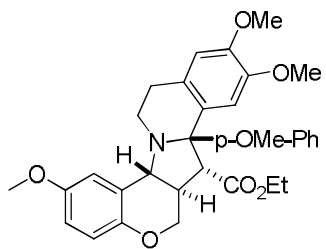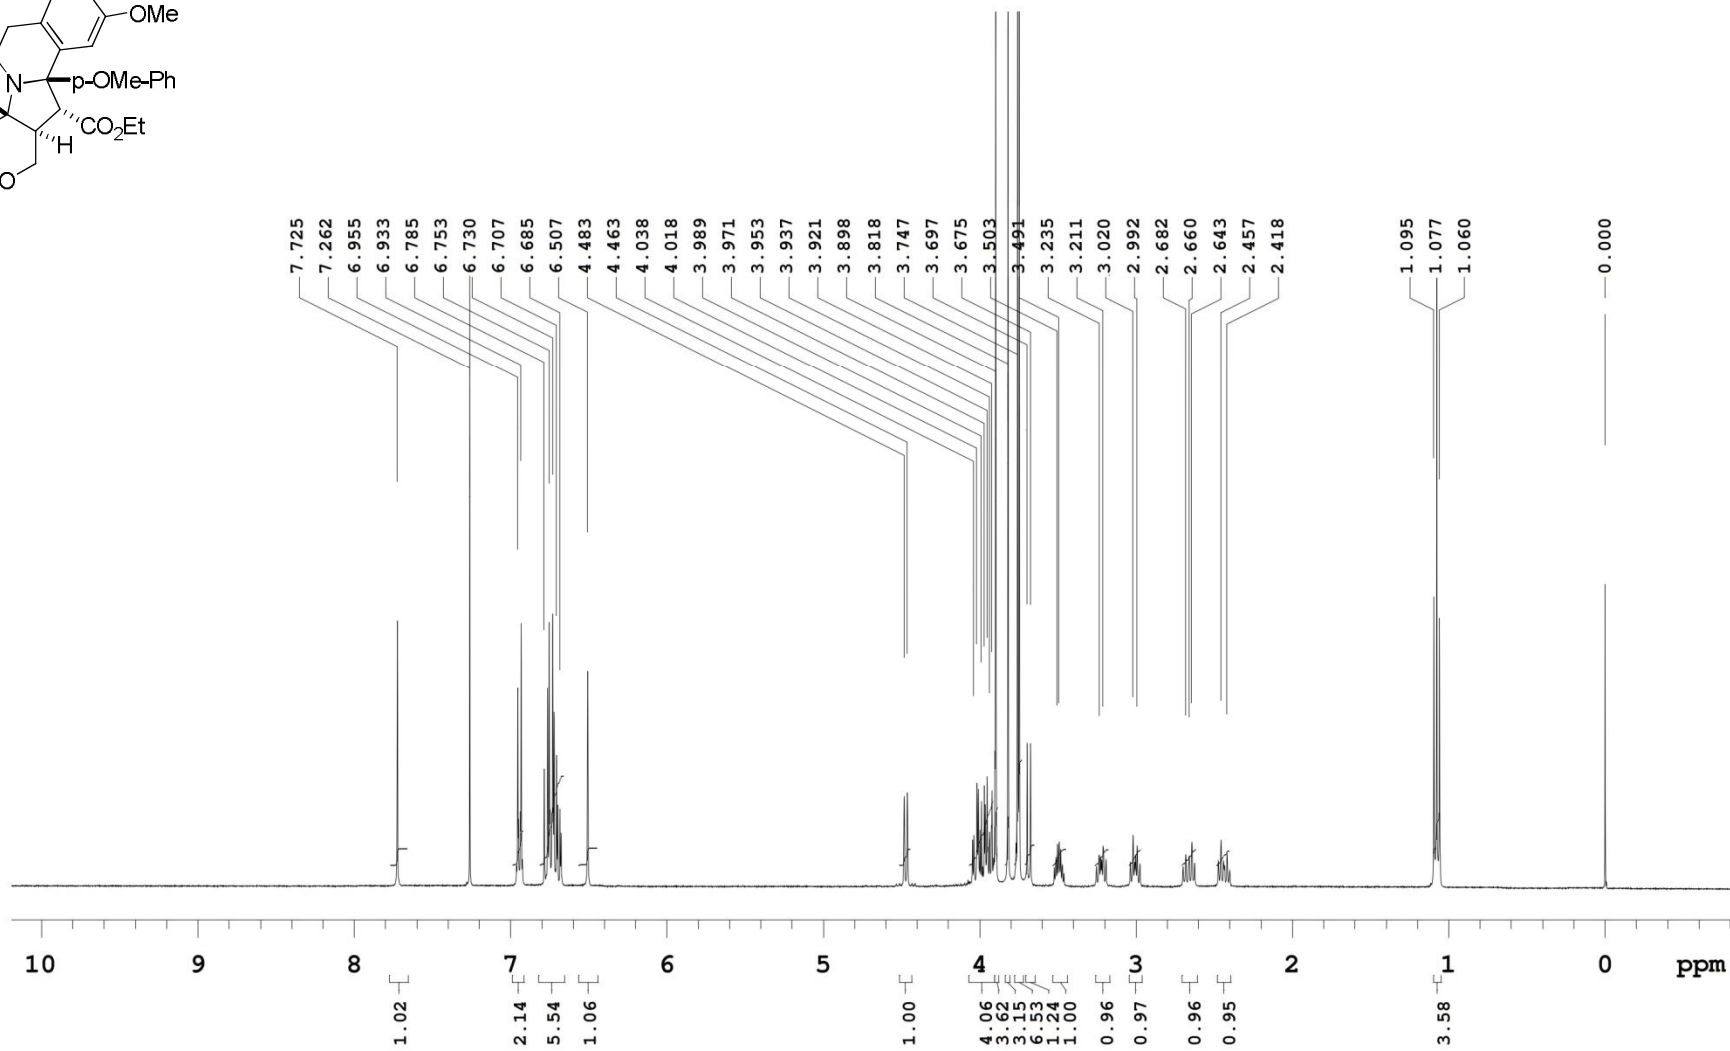

$^{13}\text{C}$  NMR of **3k** in  $\text{CDCl}_3$

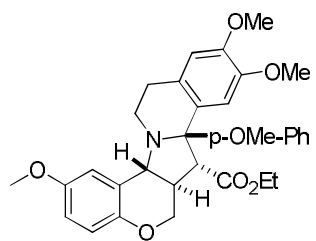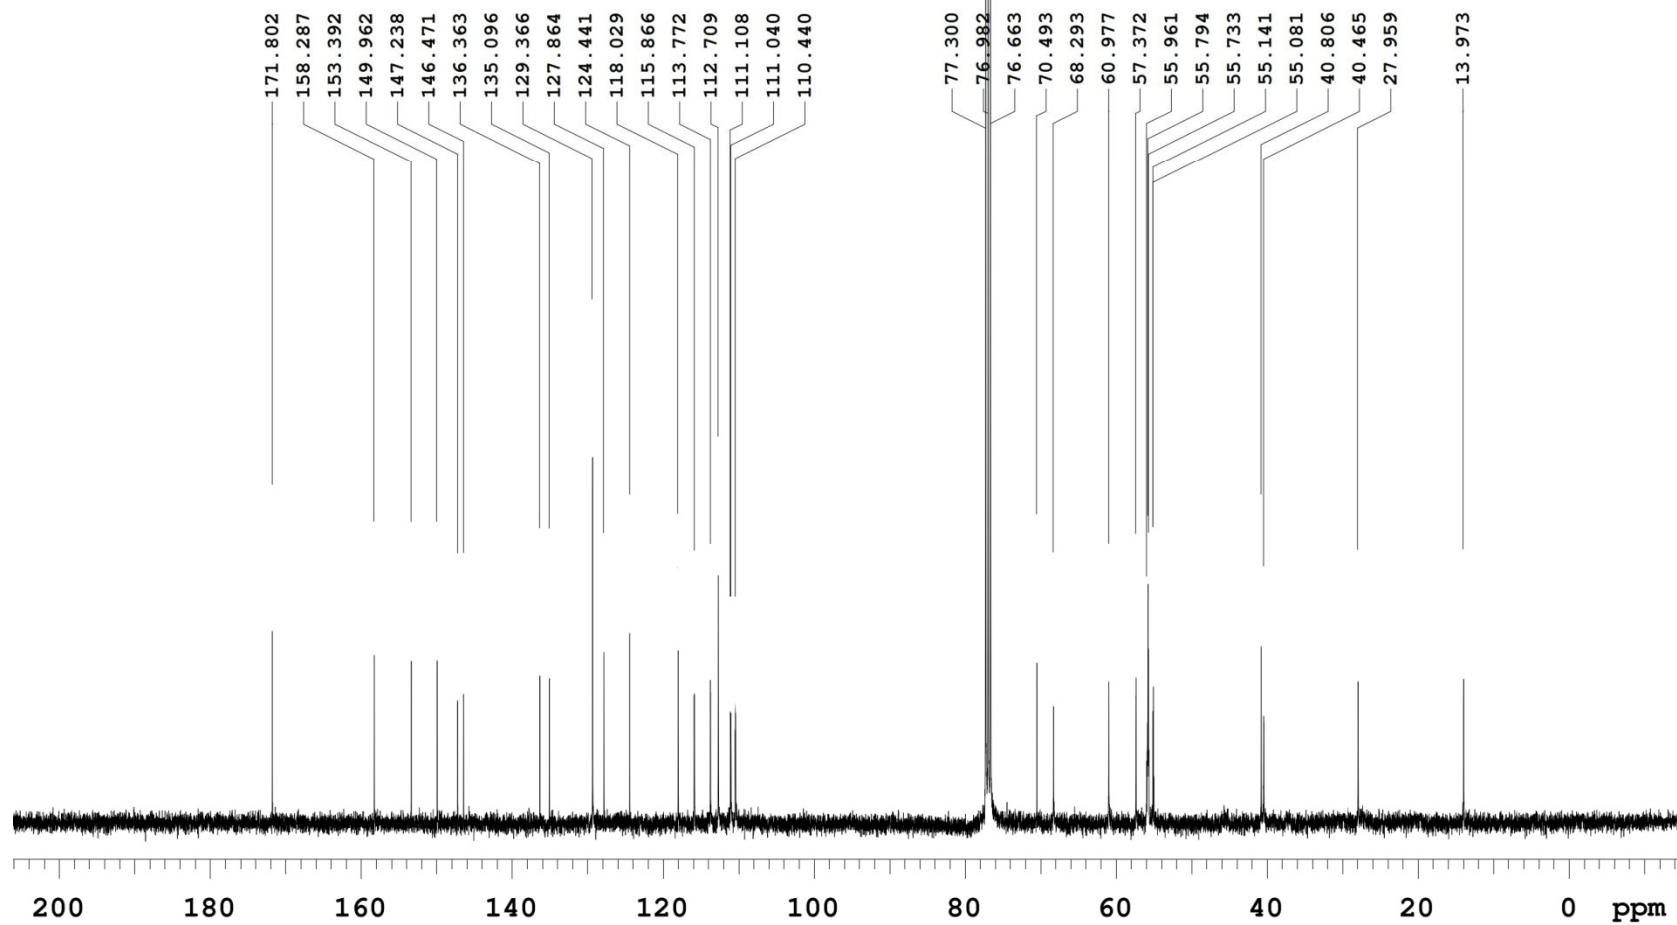

<sup>1</sup>H NMR of **31** in CDCl<sub>3</sub>

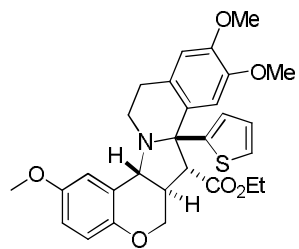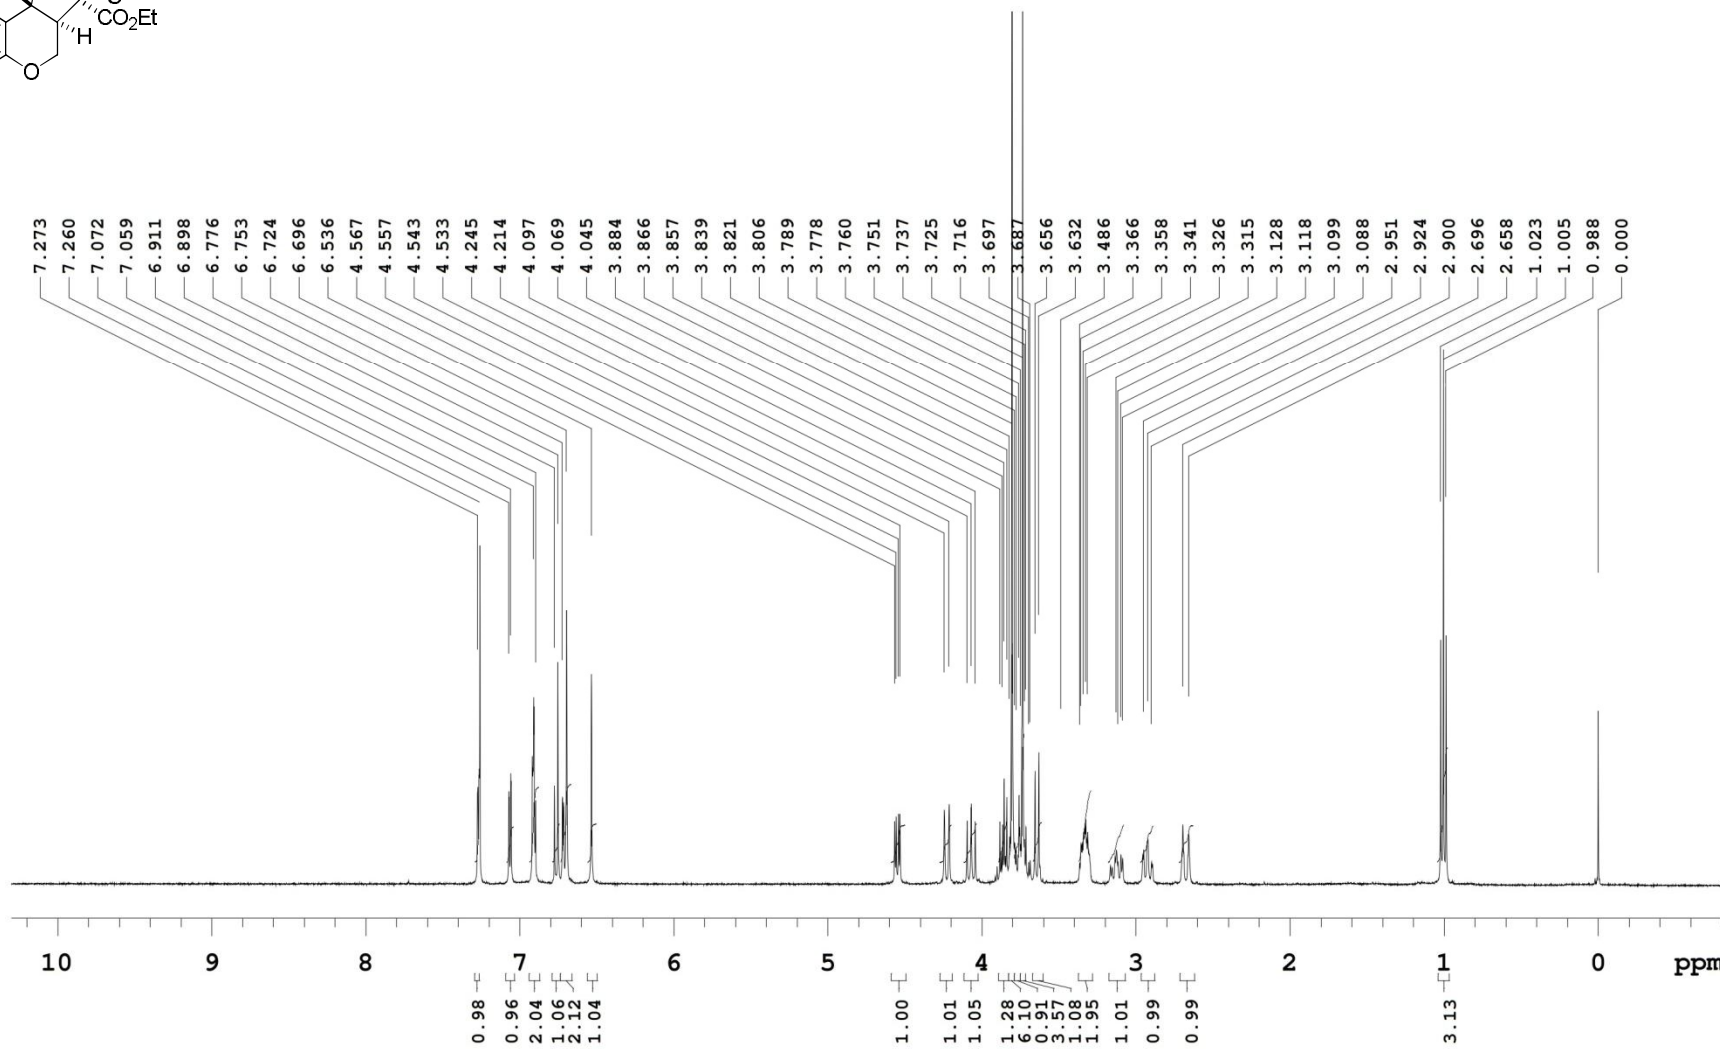

<sup>13</sup>C NMR of **31** in CDCl<sub>3</sub>

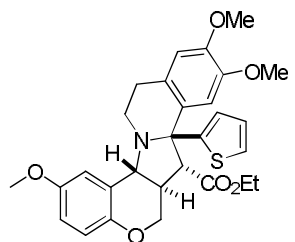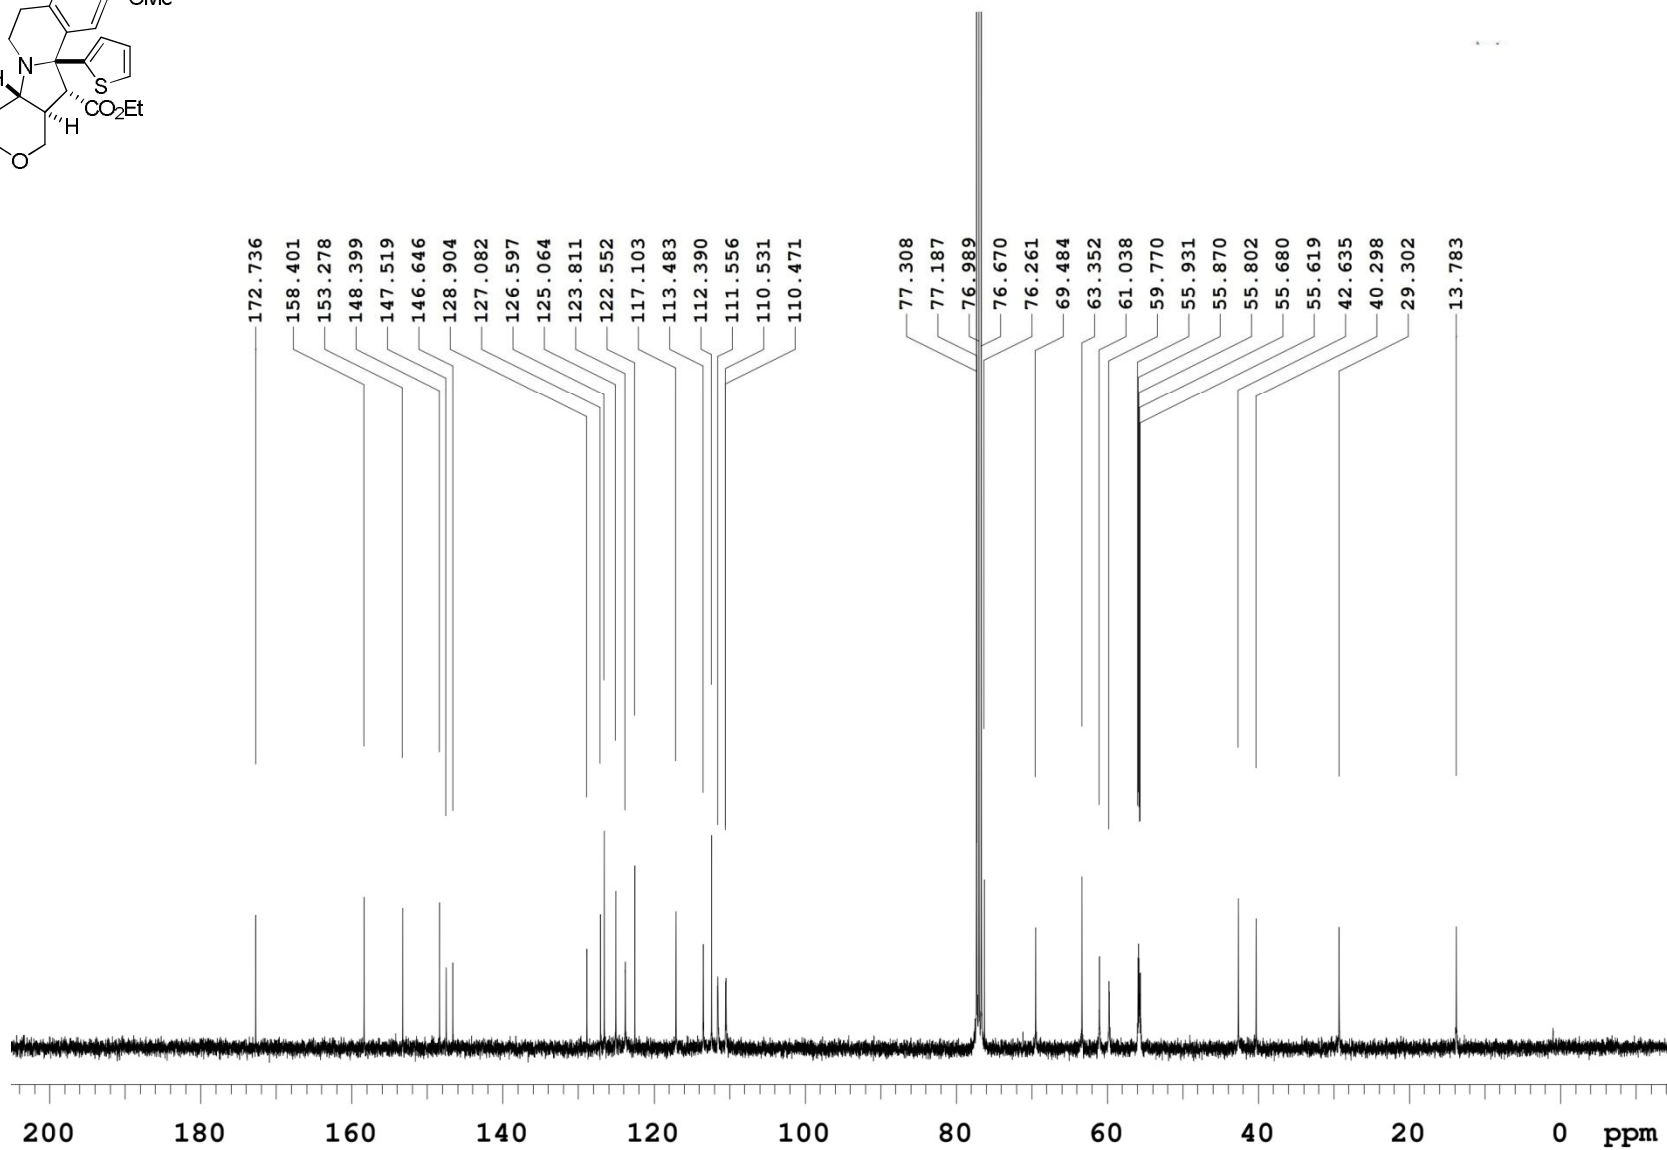

$^{13}\text{C}$  NMR of **3m** in  $\text{CDCl}_3$

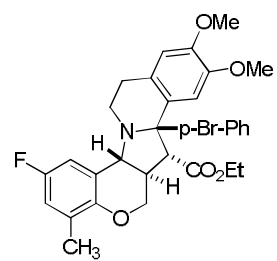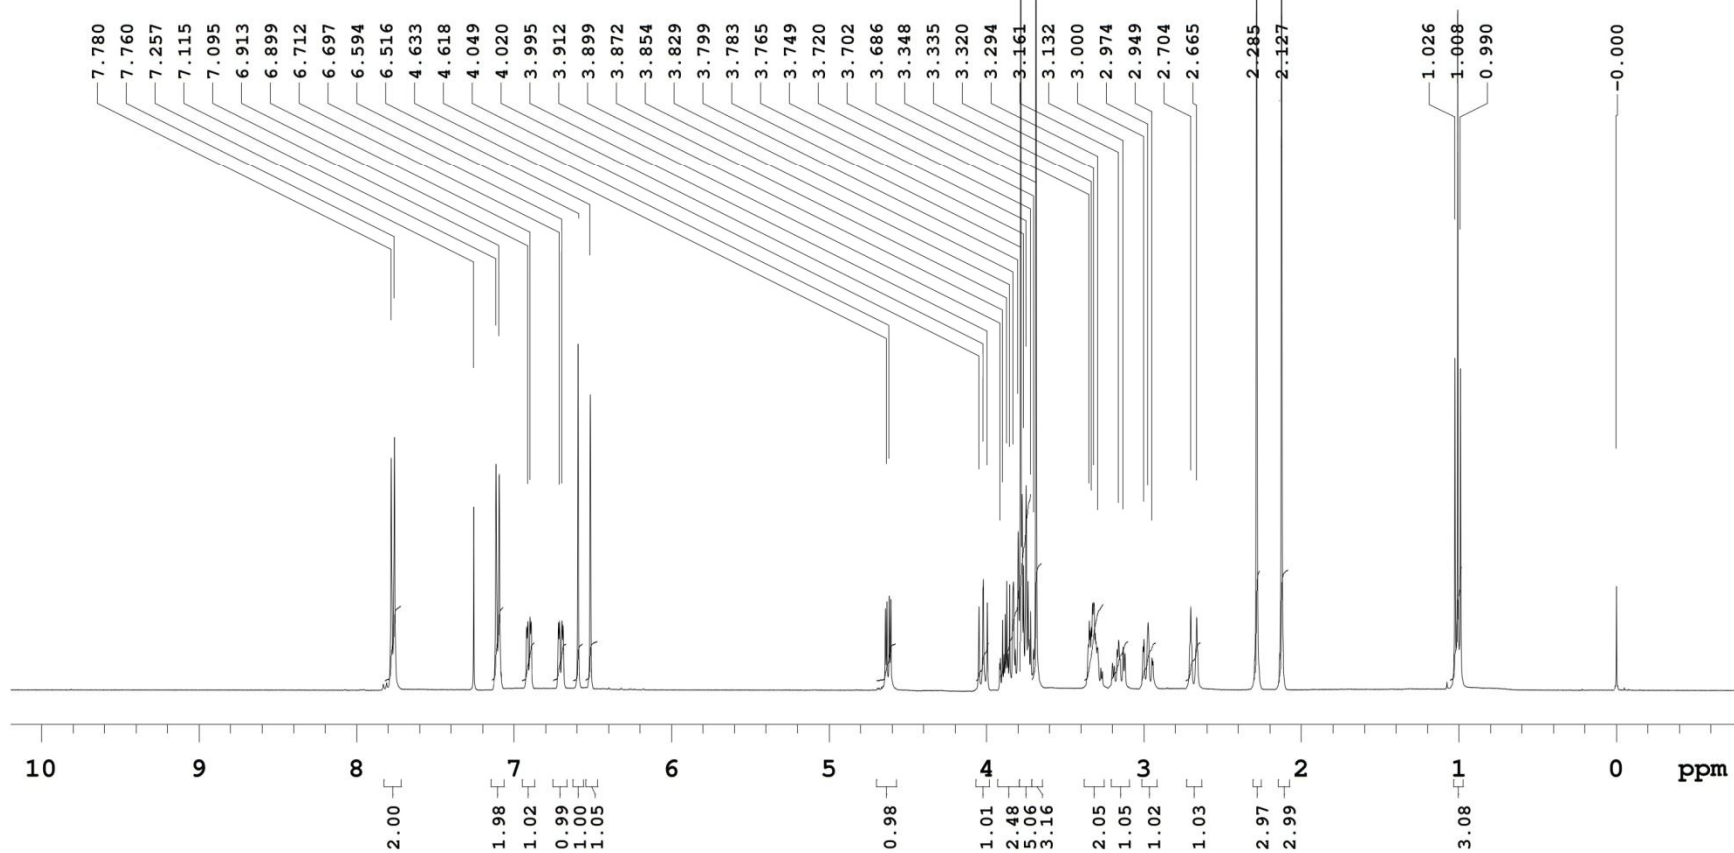

<sup>13</sup>C NMR of 3m in CDCl<sub>3</sub>

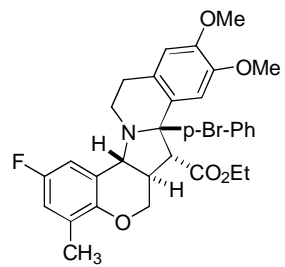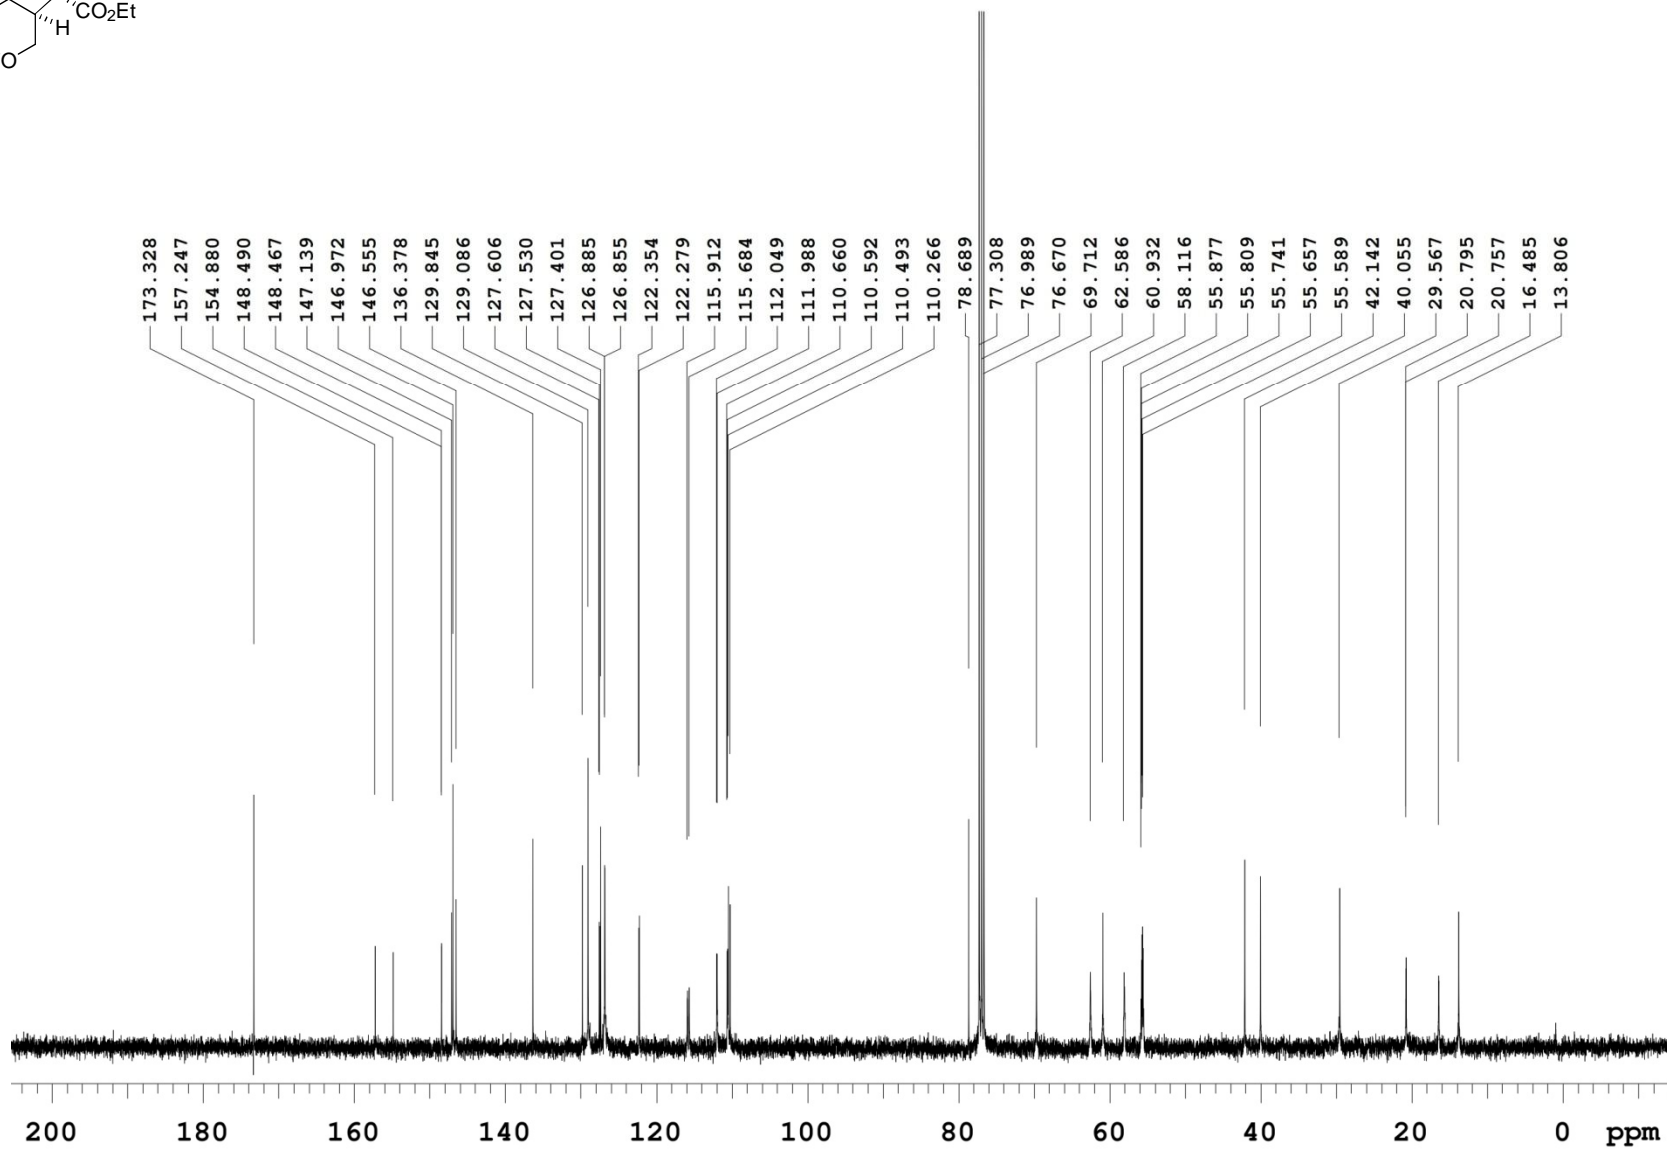

<sup>1</sup>H NMR of **3n** in CDCl<sub>3</sub>

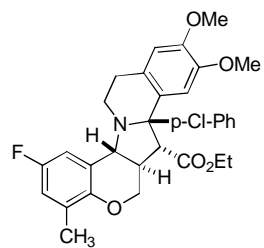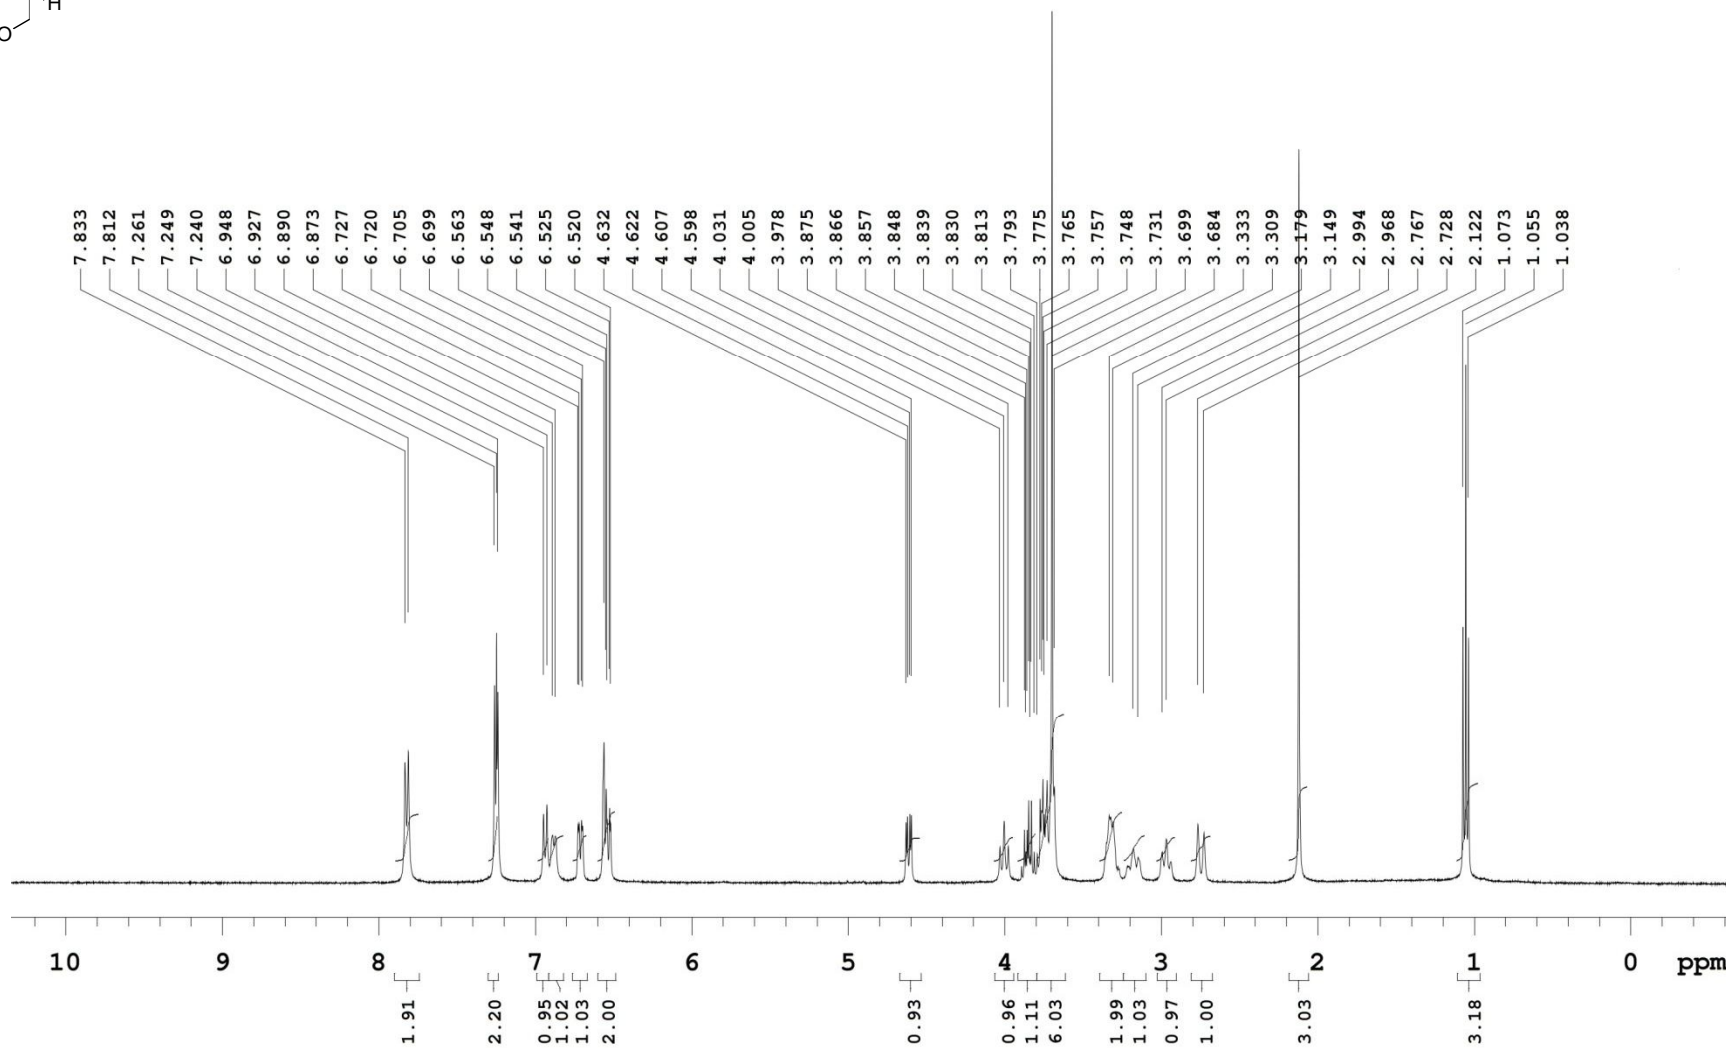



<sup>13</sup>C NMR of **3n** in CDCl<sub>3</sub>

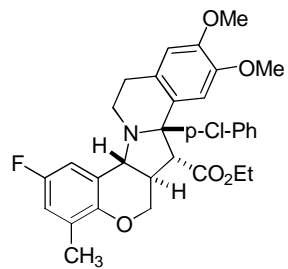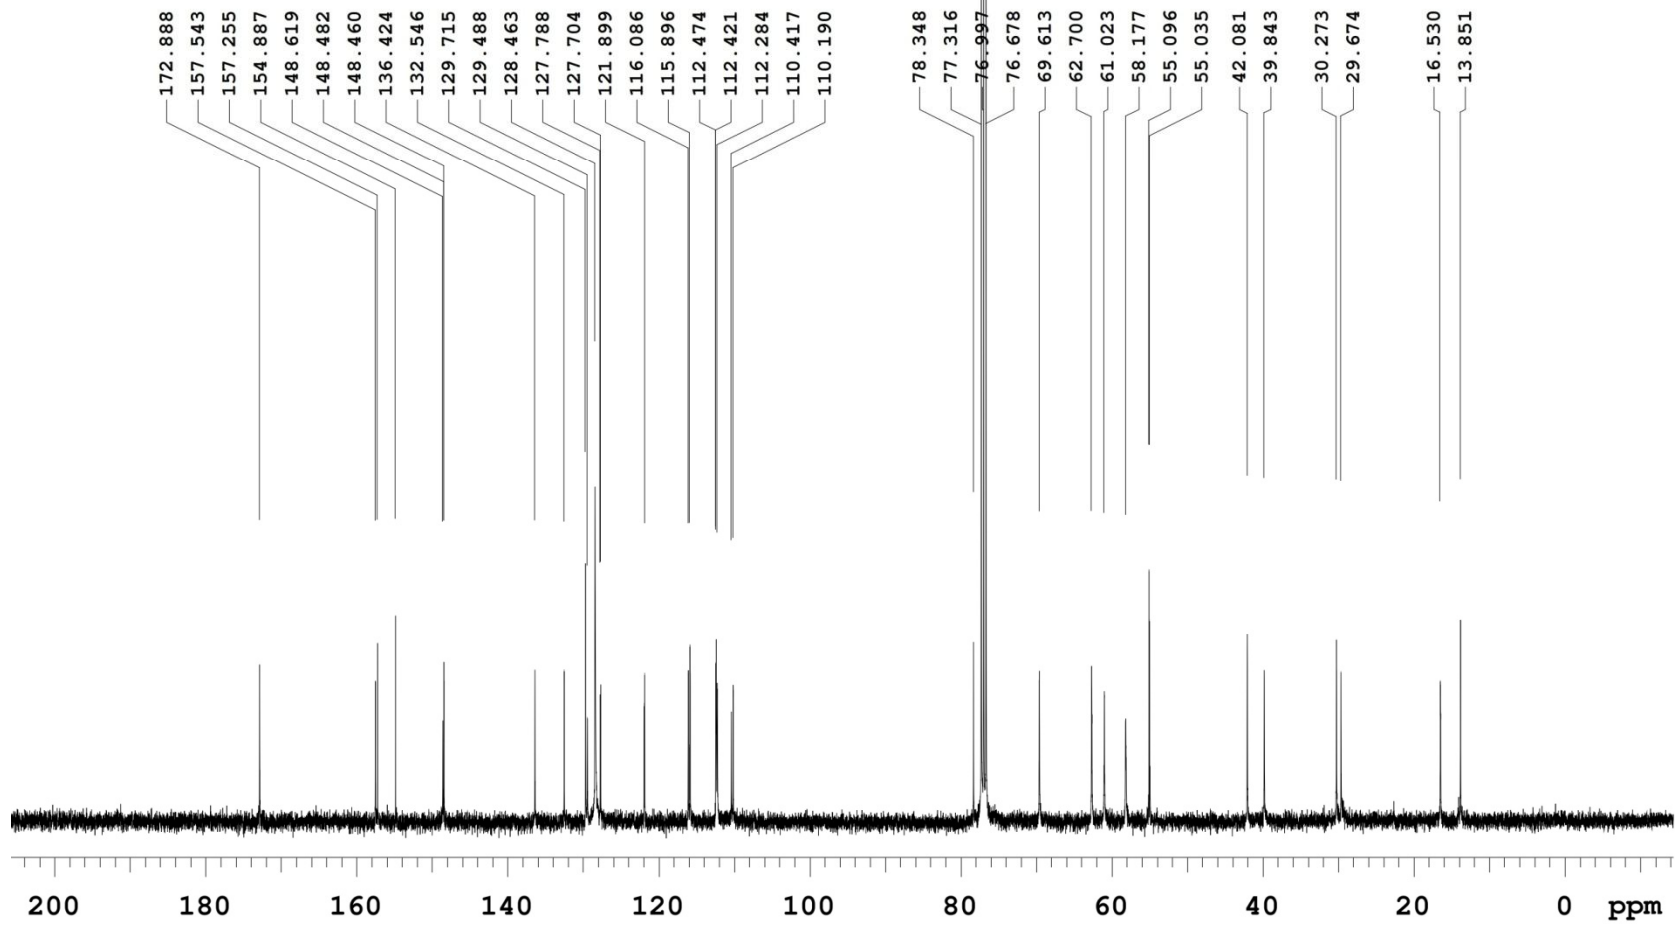

<sup>1</sup>H NMR of **3o** in CDCl<sub>3</sub>

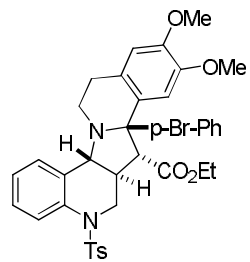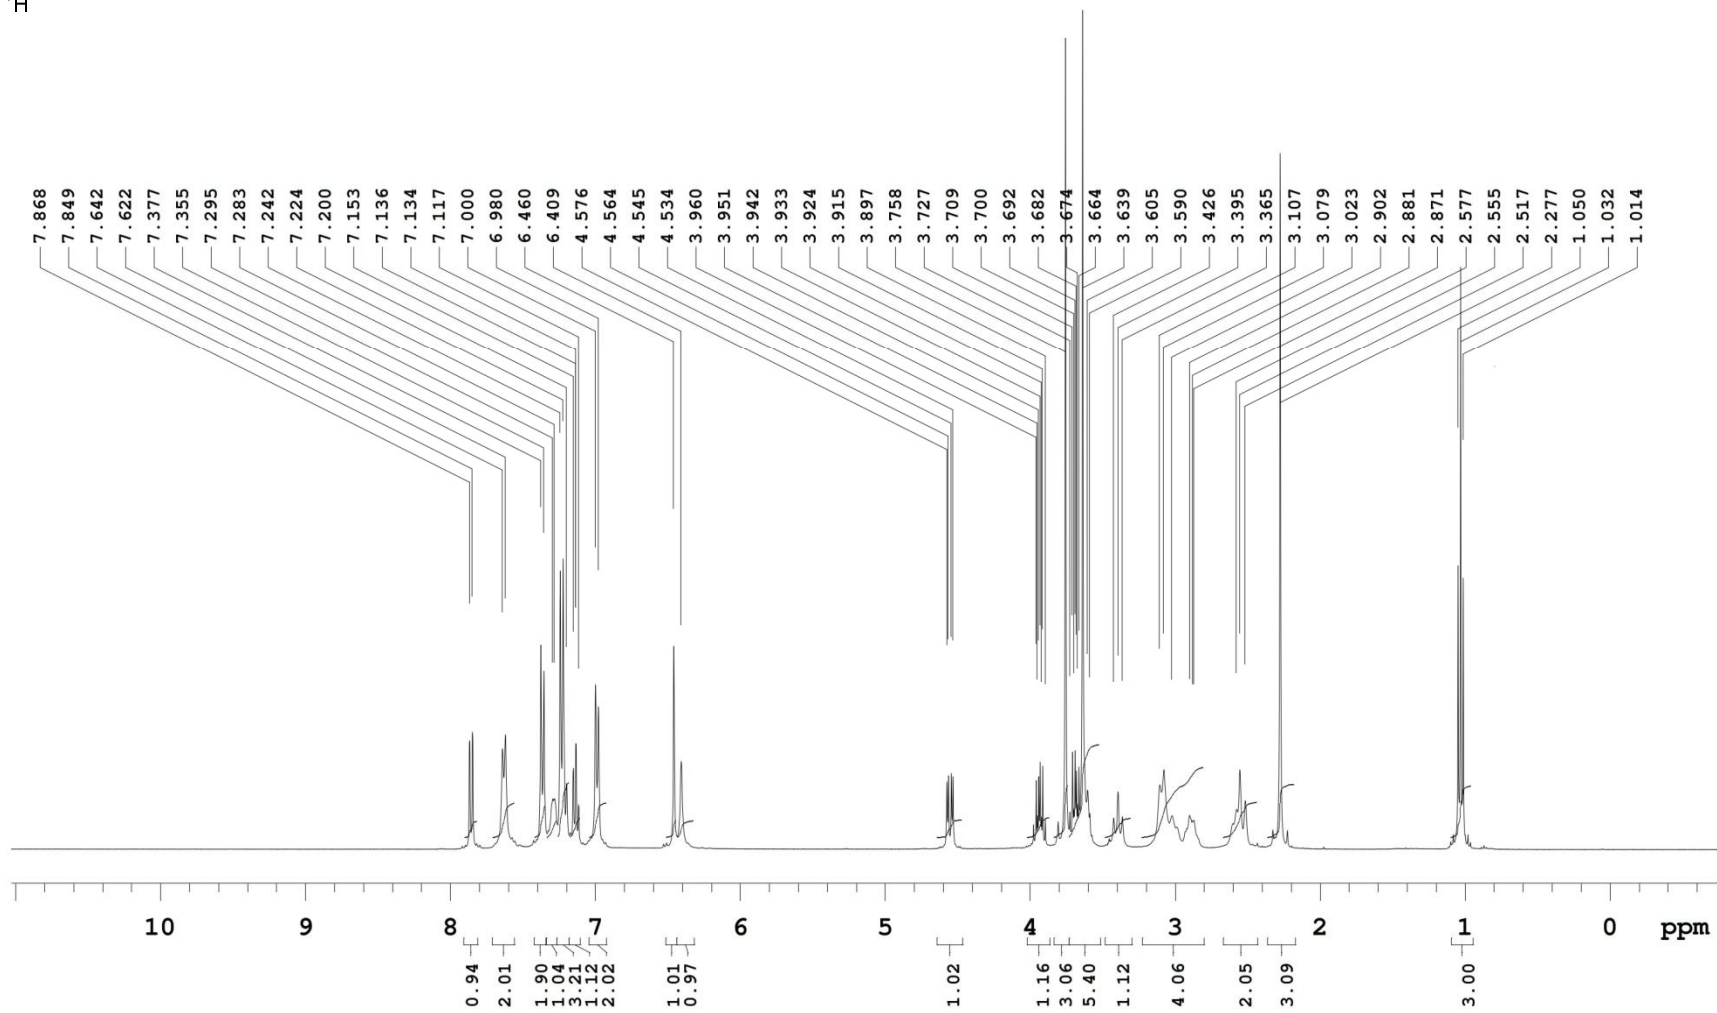

<sup>13</sup>C NMR of **3o** in CDCl<sub>3</sub>

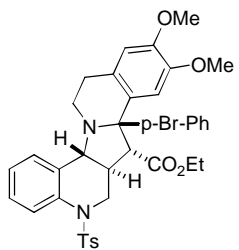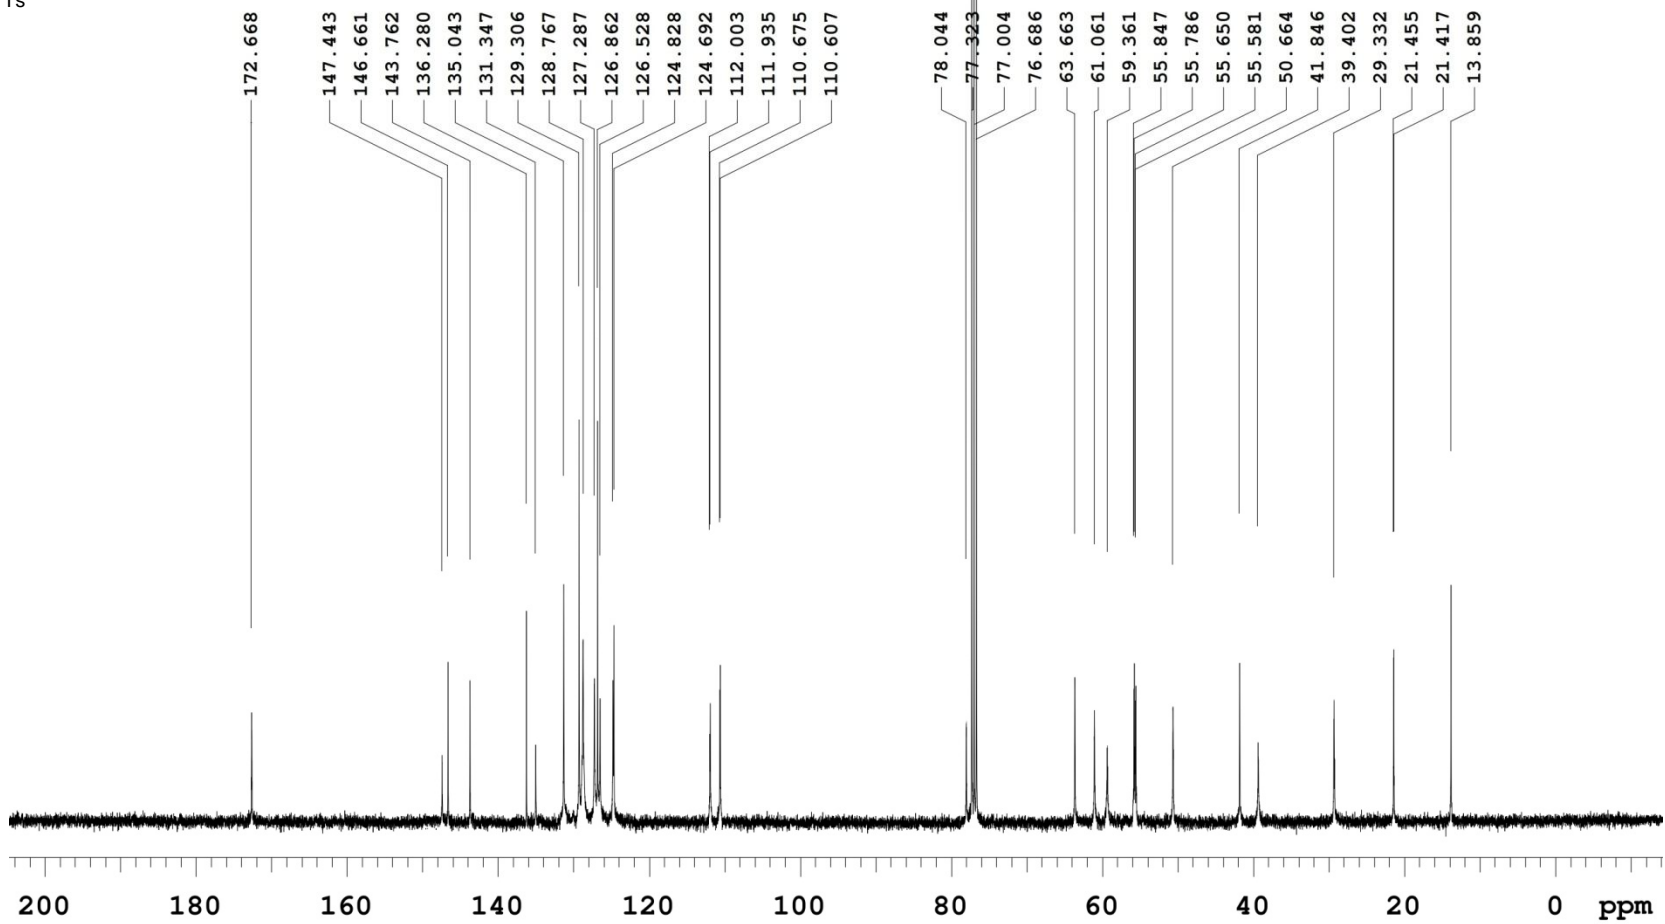

$^1\text{H}$  NMR of 3p in  $\text{CDCl}_3$

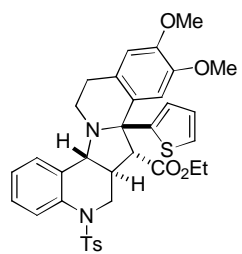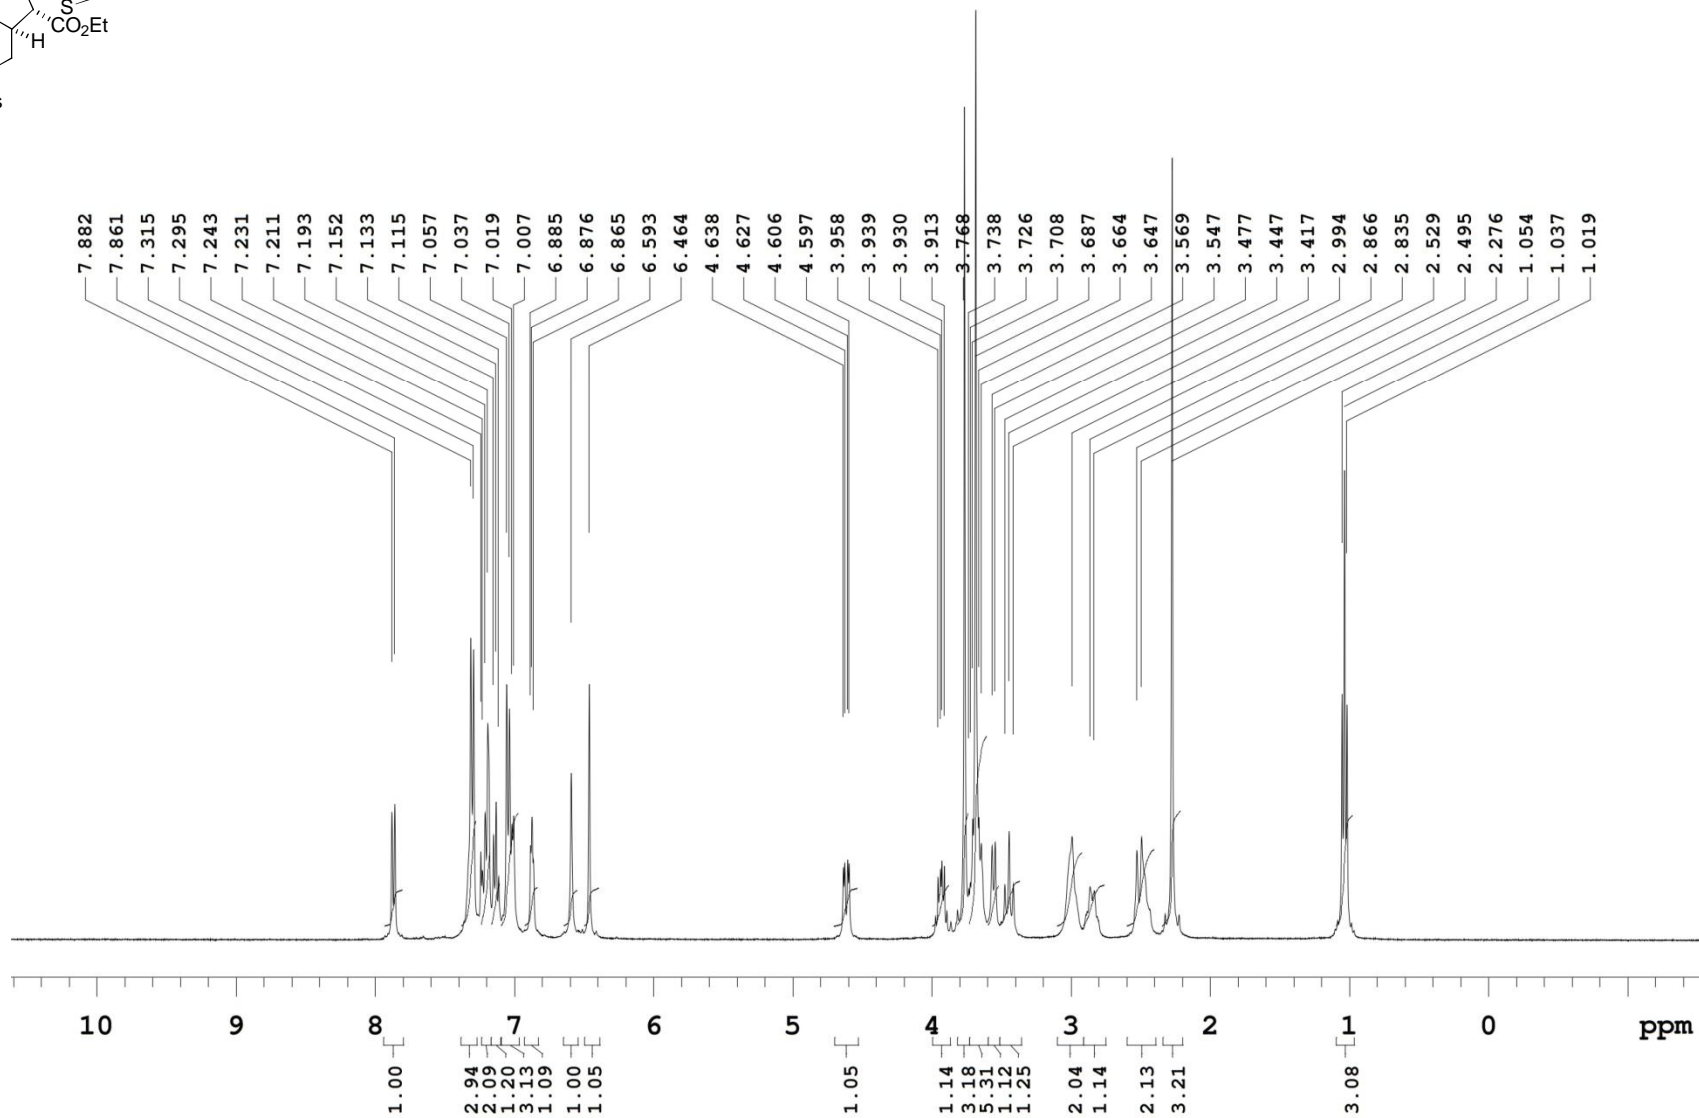

$^{13}\text{C}$  NMR of **3p** in  $\text{CDCl}_3$

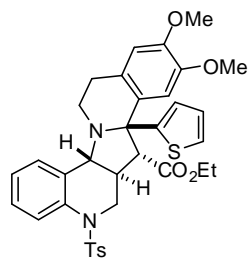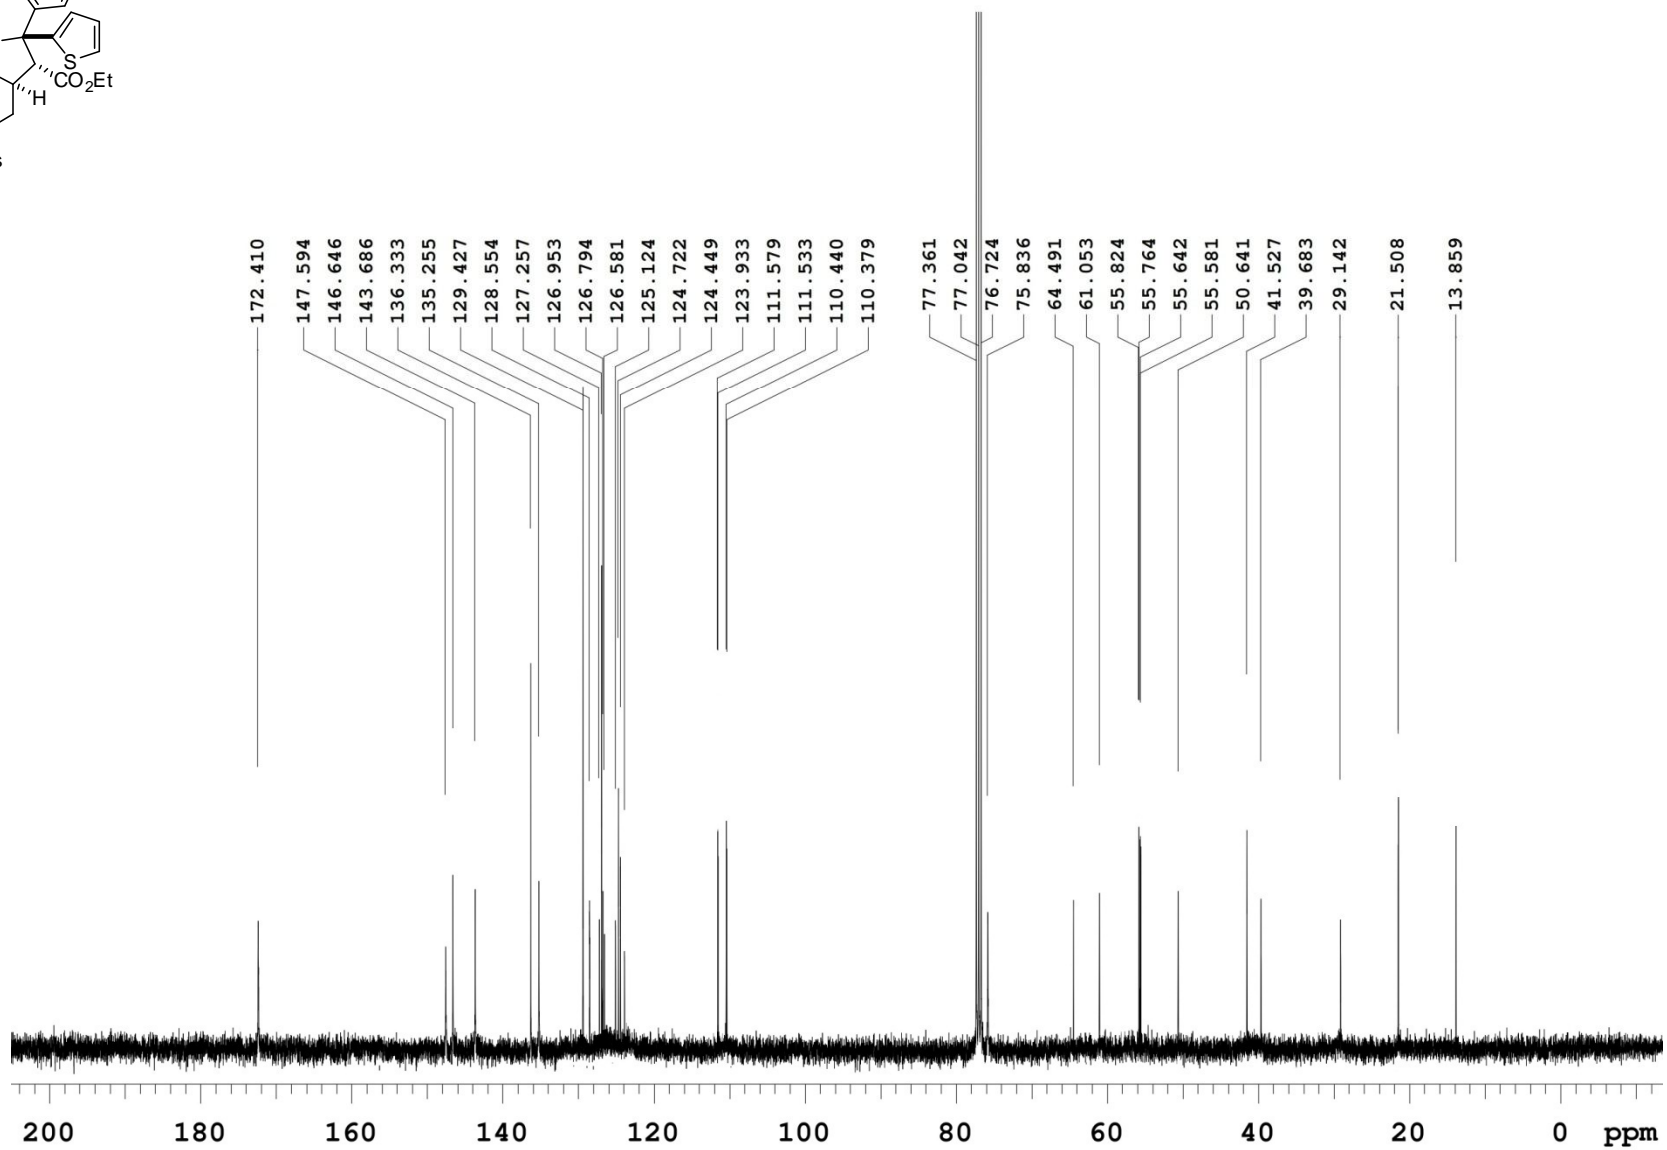

ORTEP Diagram Of 3p

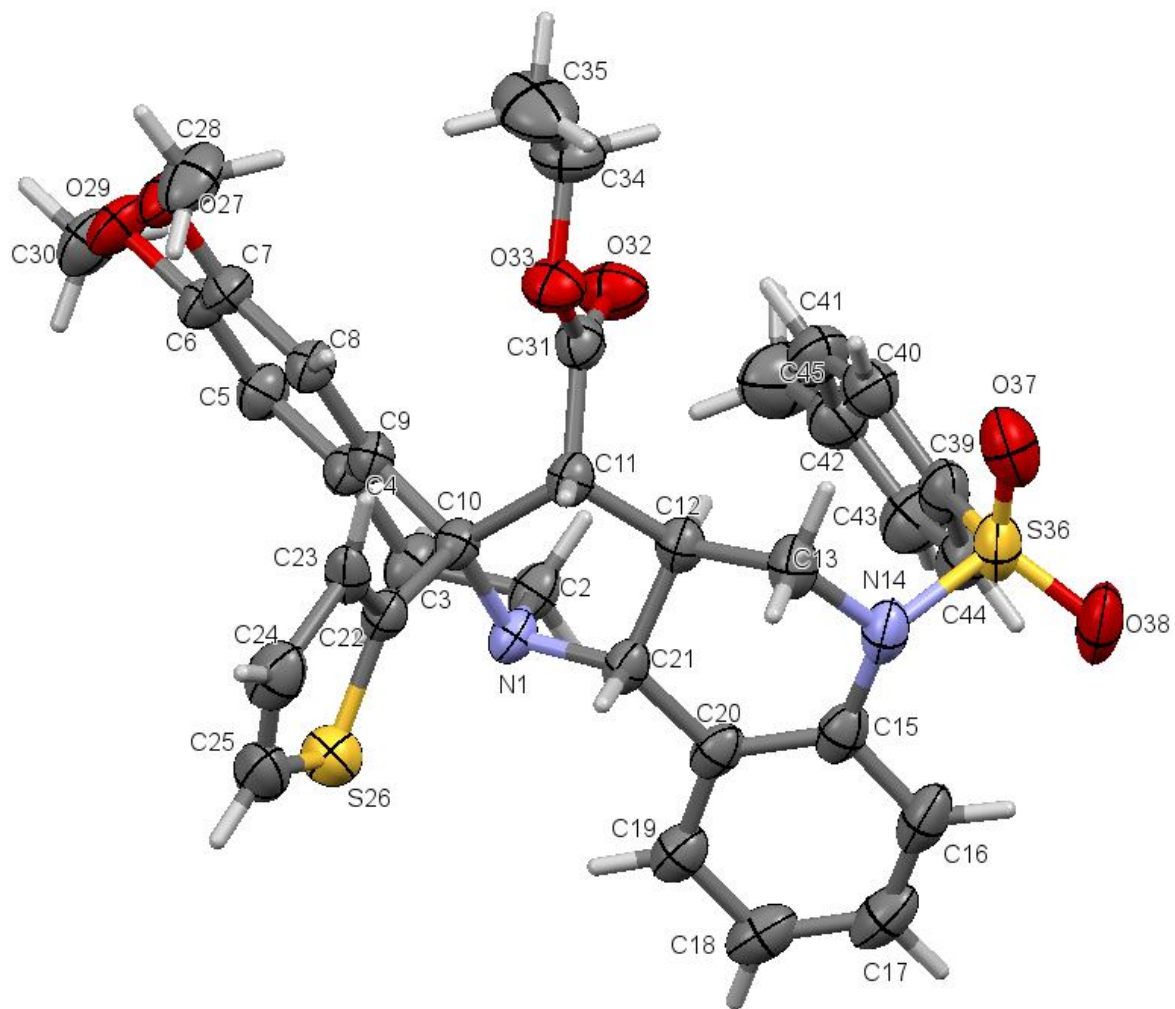

<sup>1</sup>H NMR of **4a** in DMSO-d<sub>6</sub>

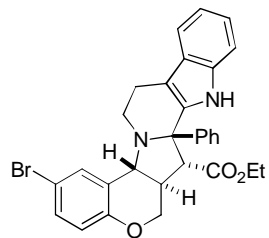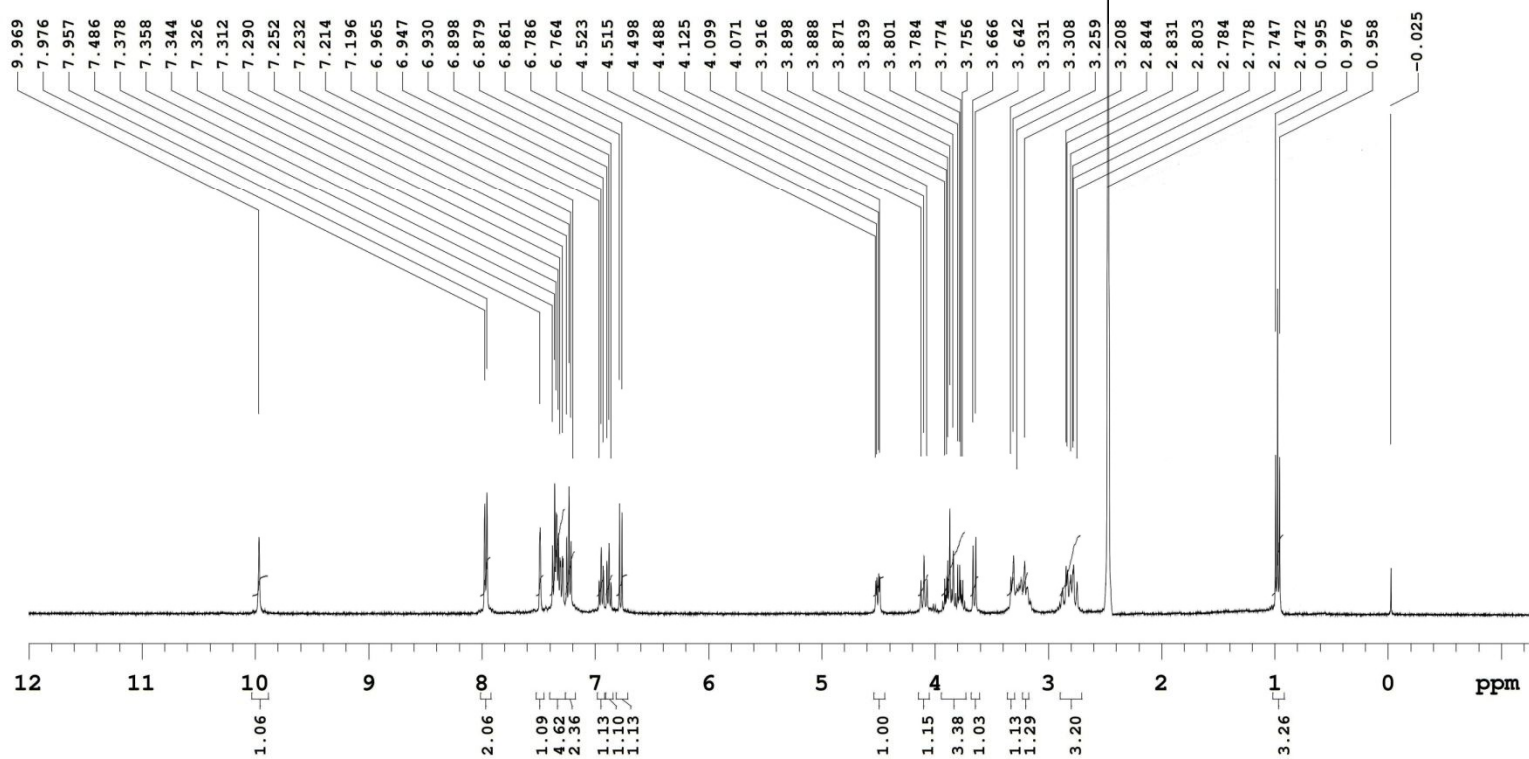

<sup>13</sup>C NMR of **4a** in DMSO-d<sub>6</sub>

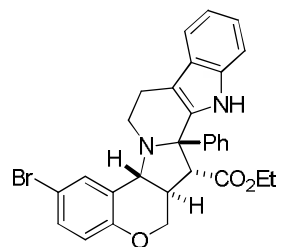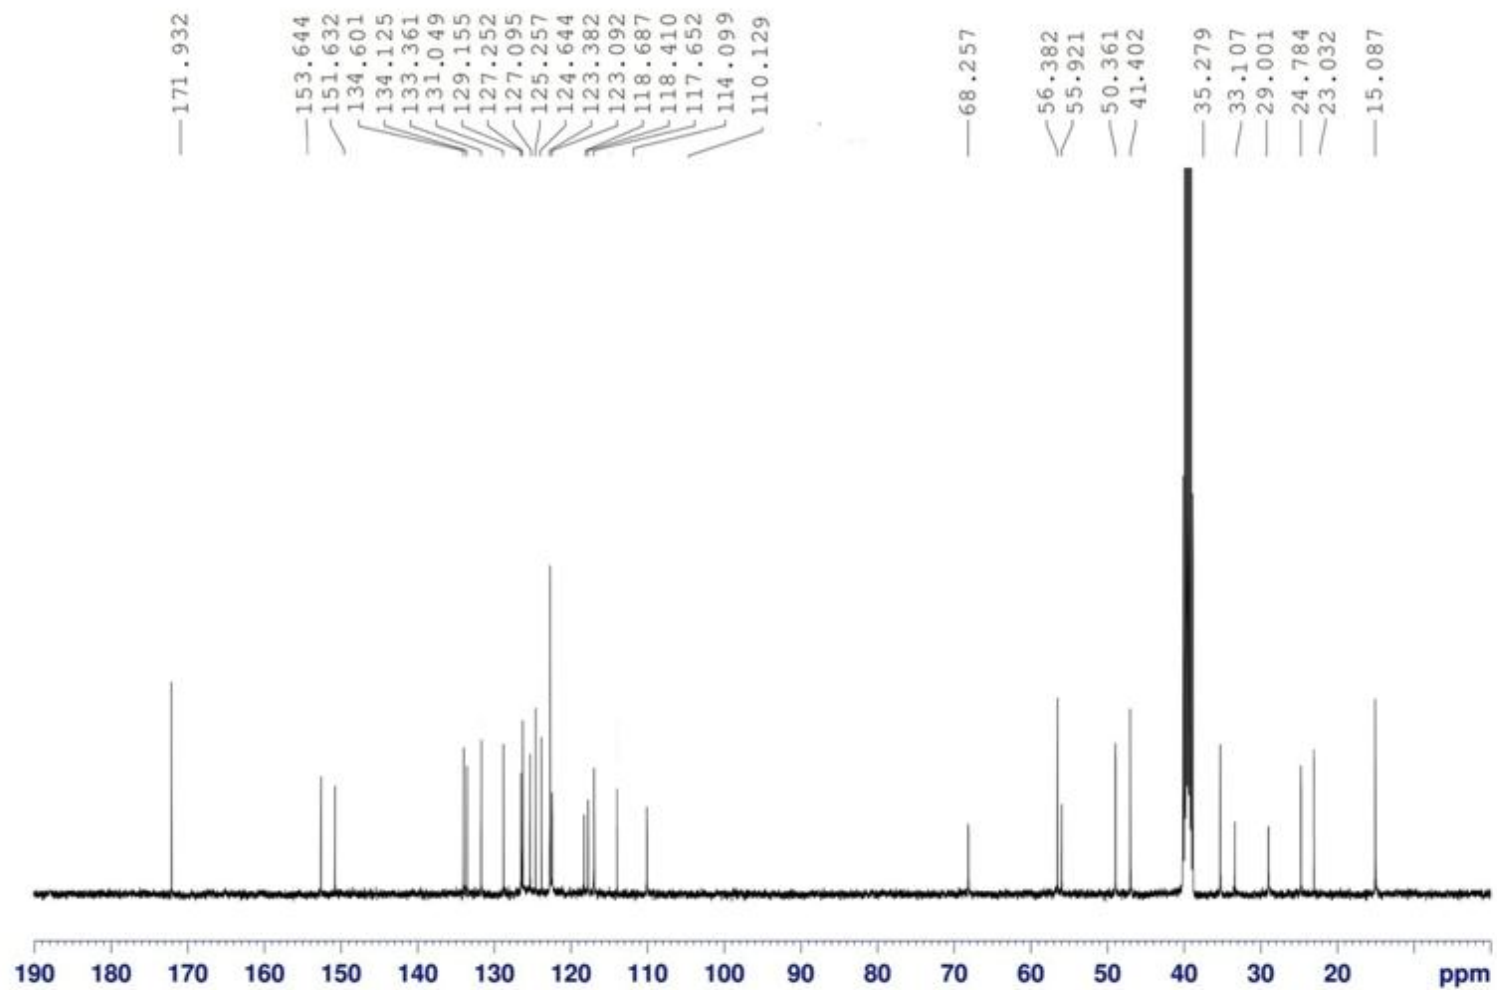



<sup>1</sup>H NMR of **4b** in DMSO-d<sub>6</sub>

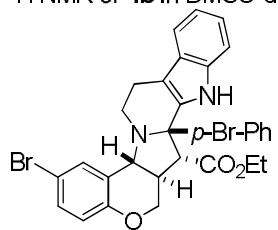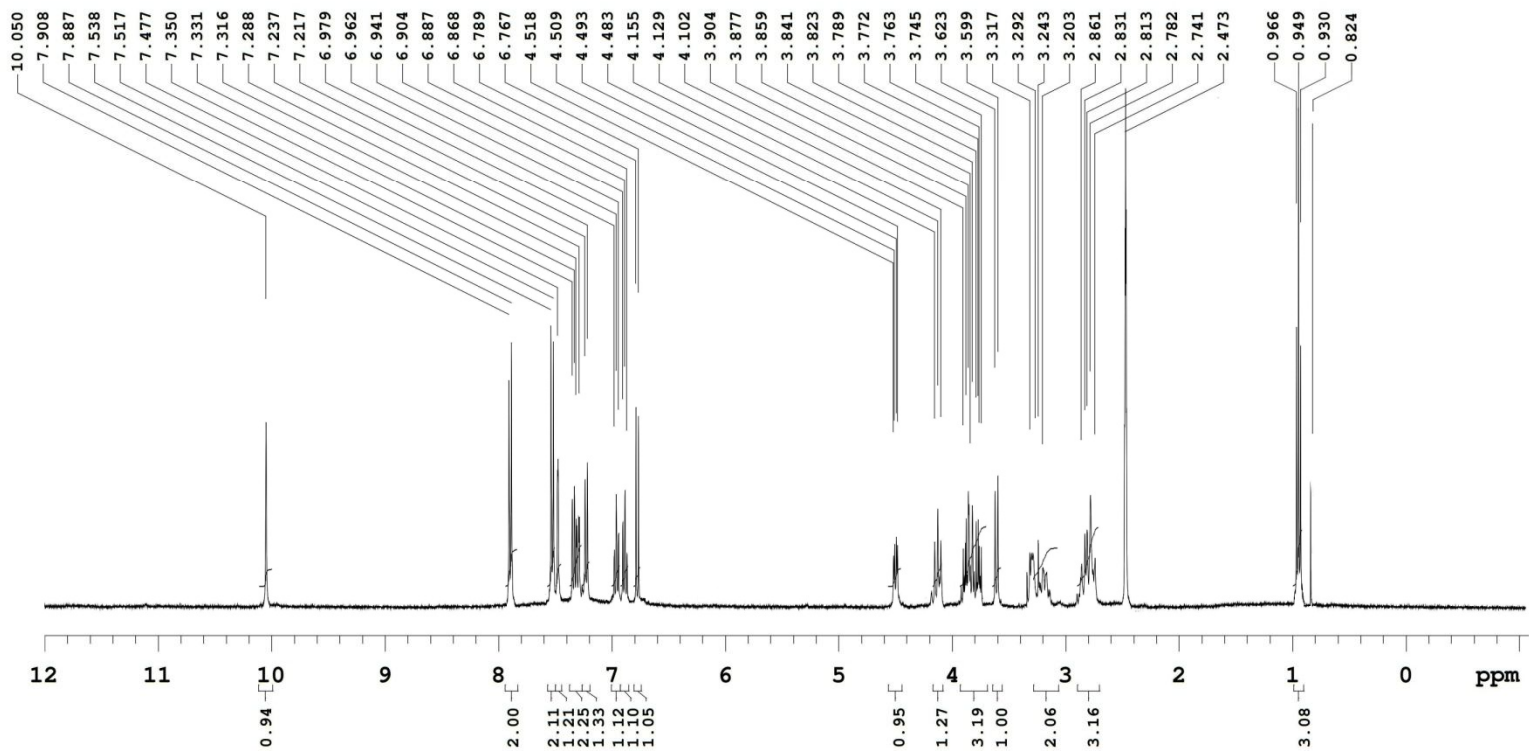

$^{13}\text{C}$  NMR of **4b** in  $\text{CDCl}_3$

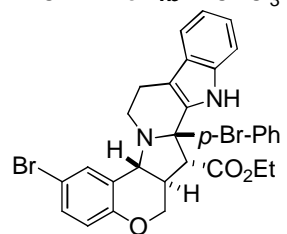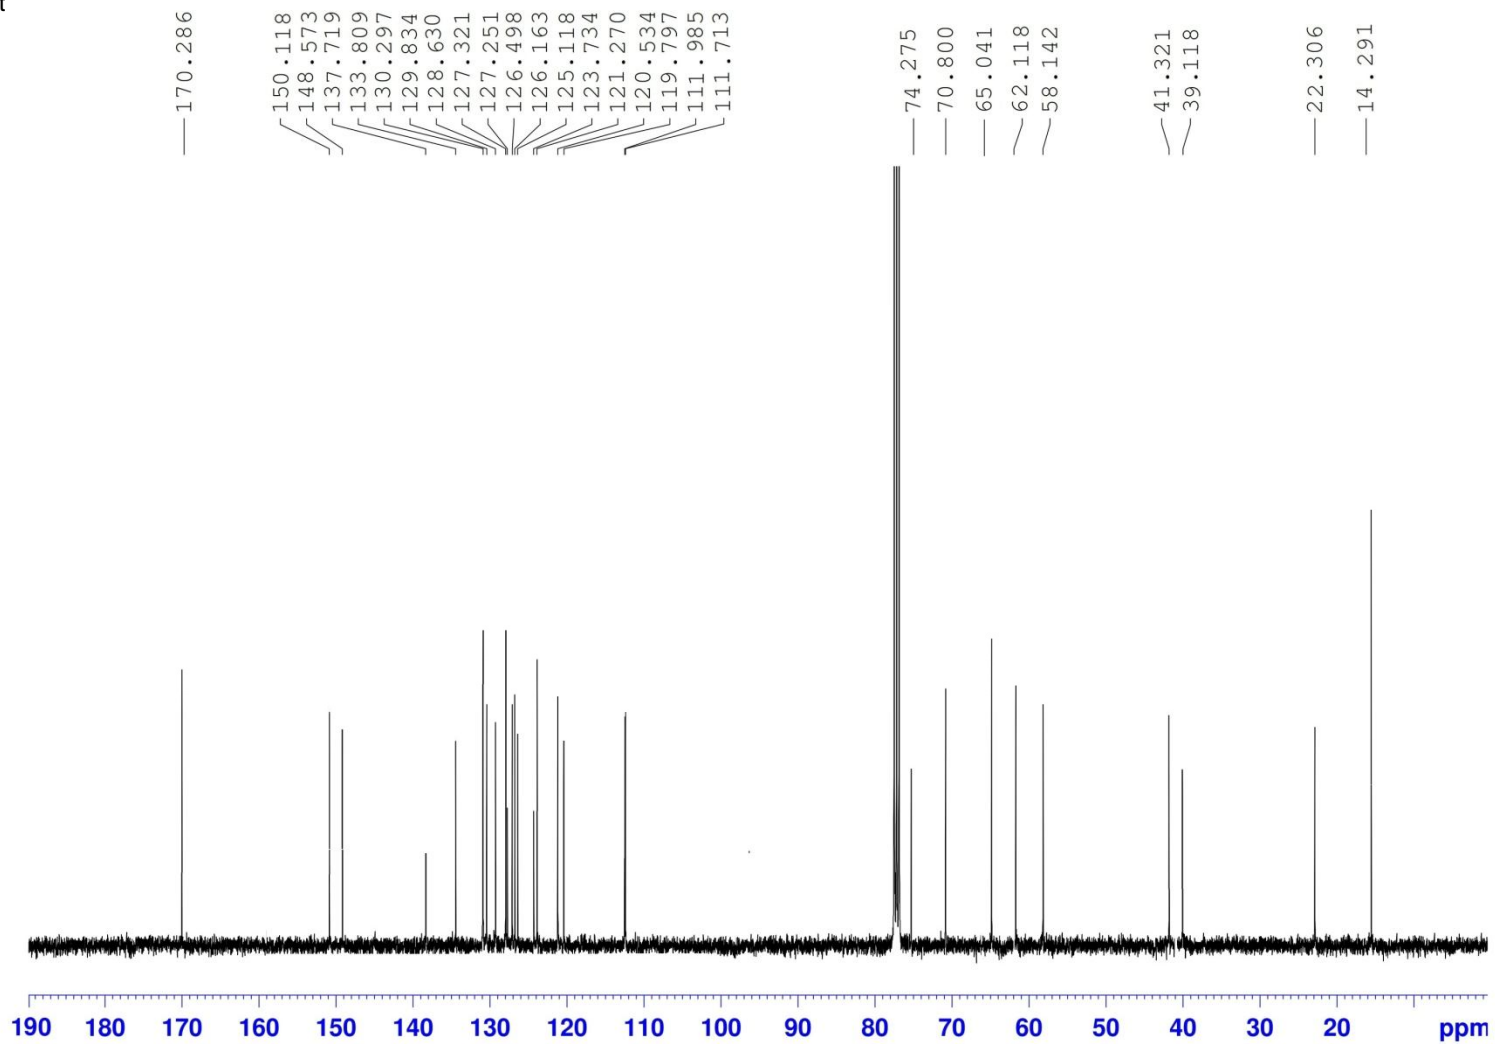

$^1\text{H}$  NMR of **4c** in  $\text{DMSO-d}_6$

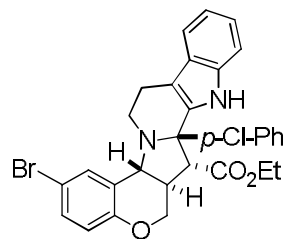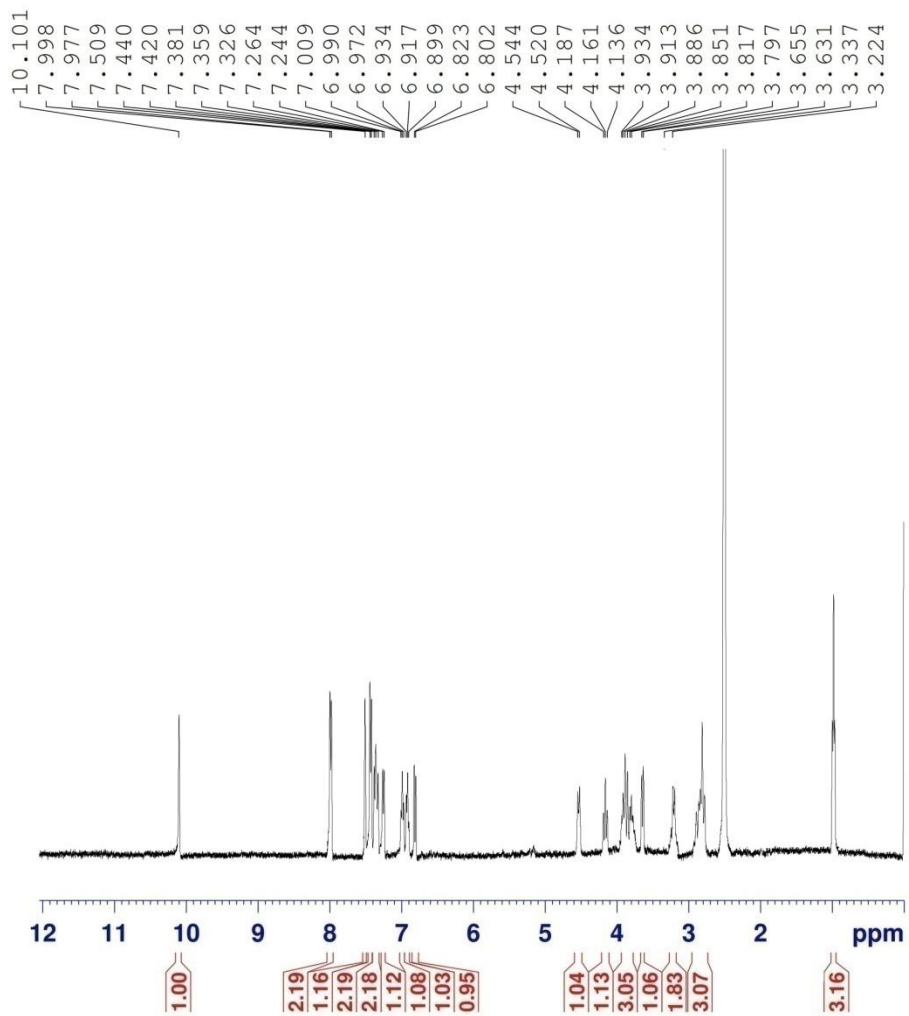

$^{13}\text{C}$  NMR of **4c** in  $\text{DMSO-d}_6$

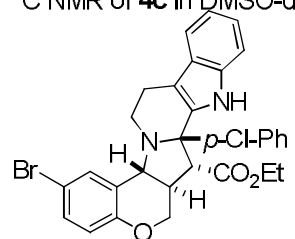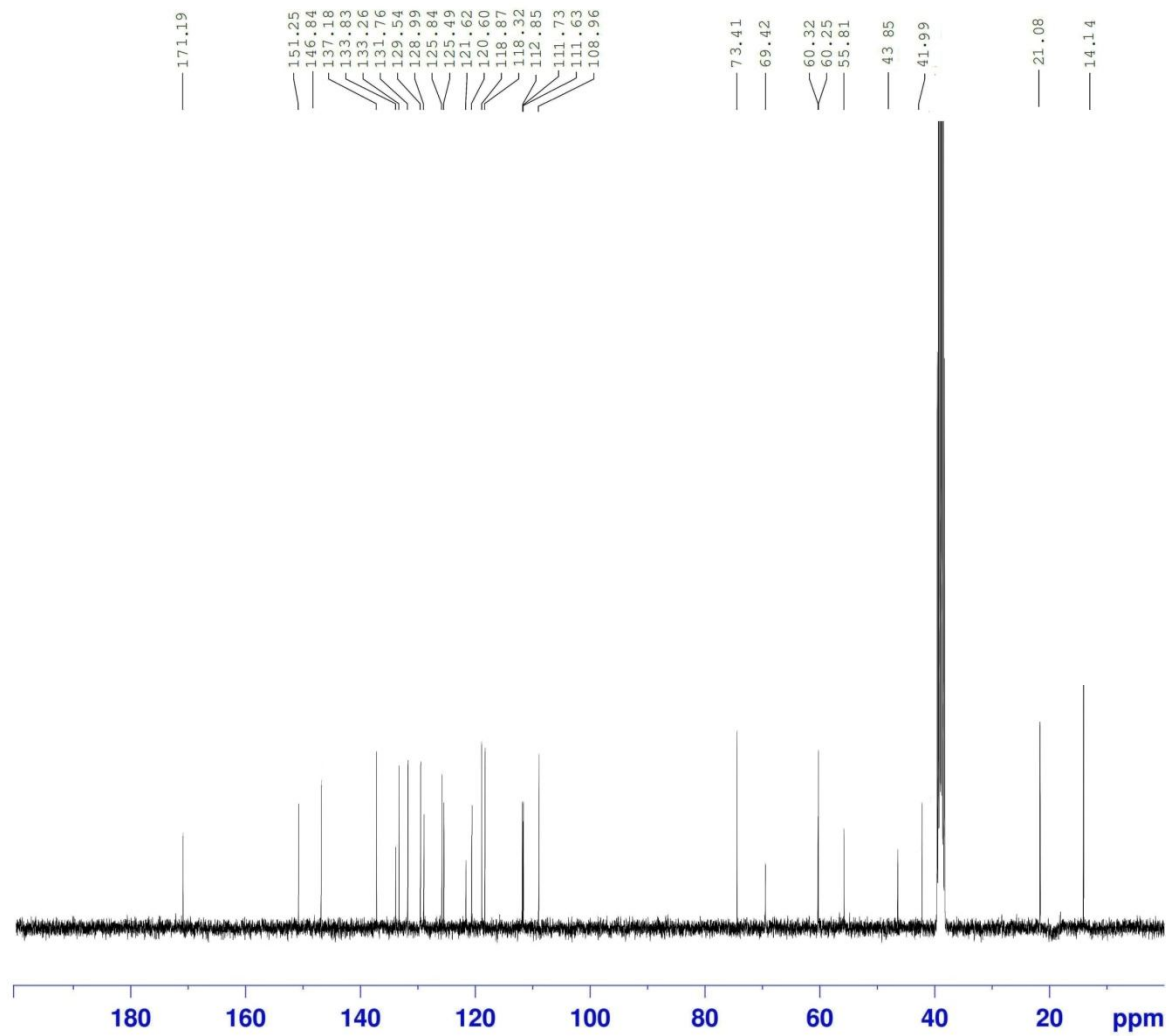

ORTEP diagram of **4c**

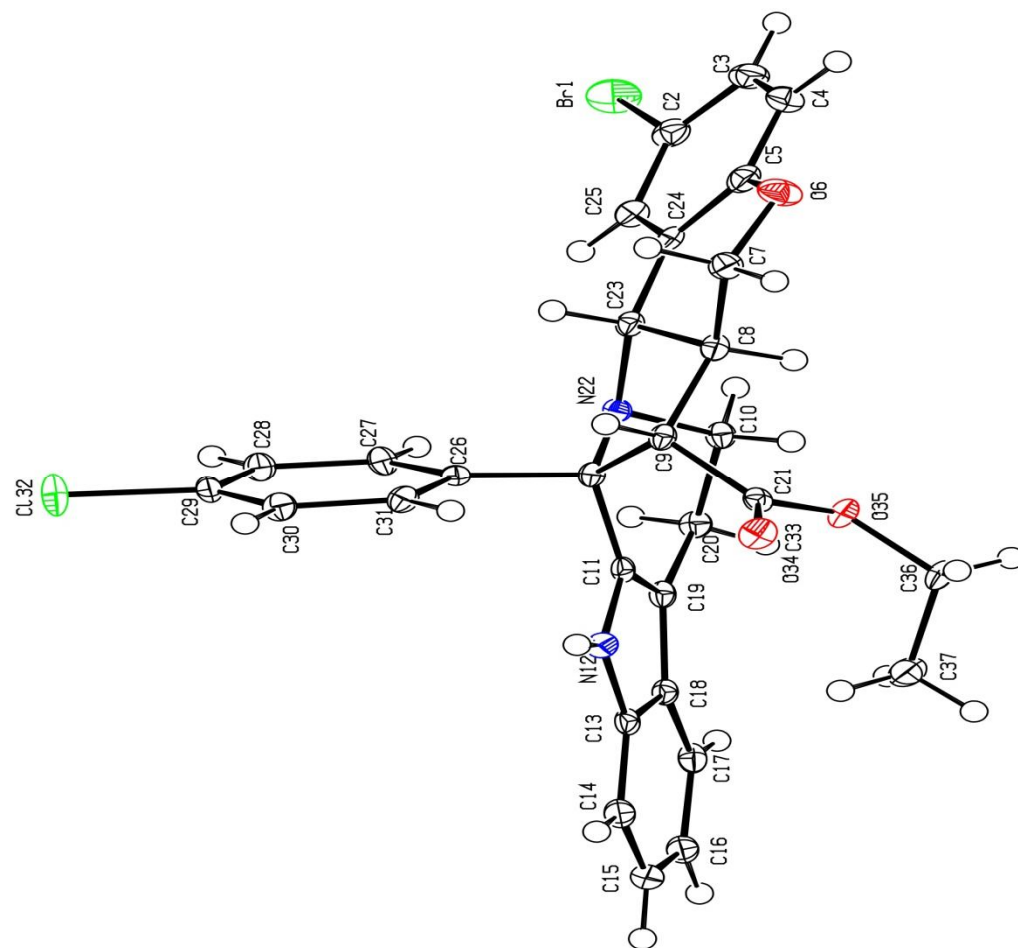

<sup>1</sup>H NMR of **4d** in DMSO-d<sub>6</sub>

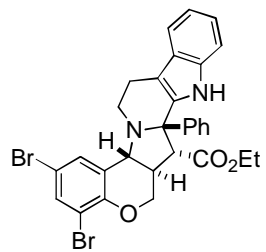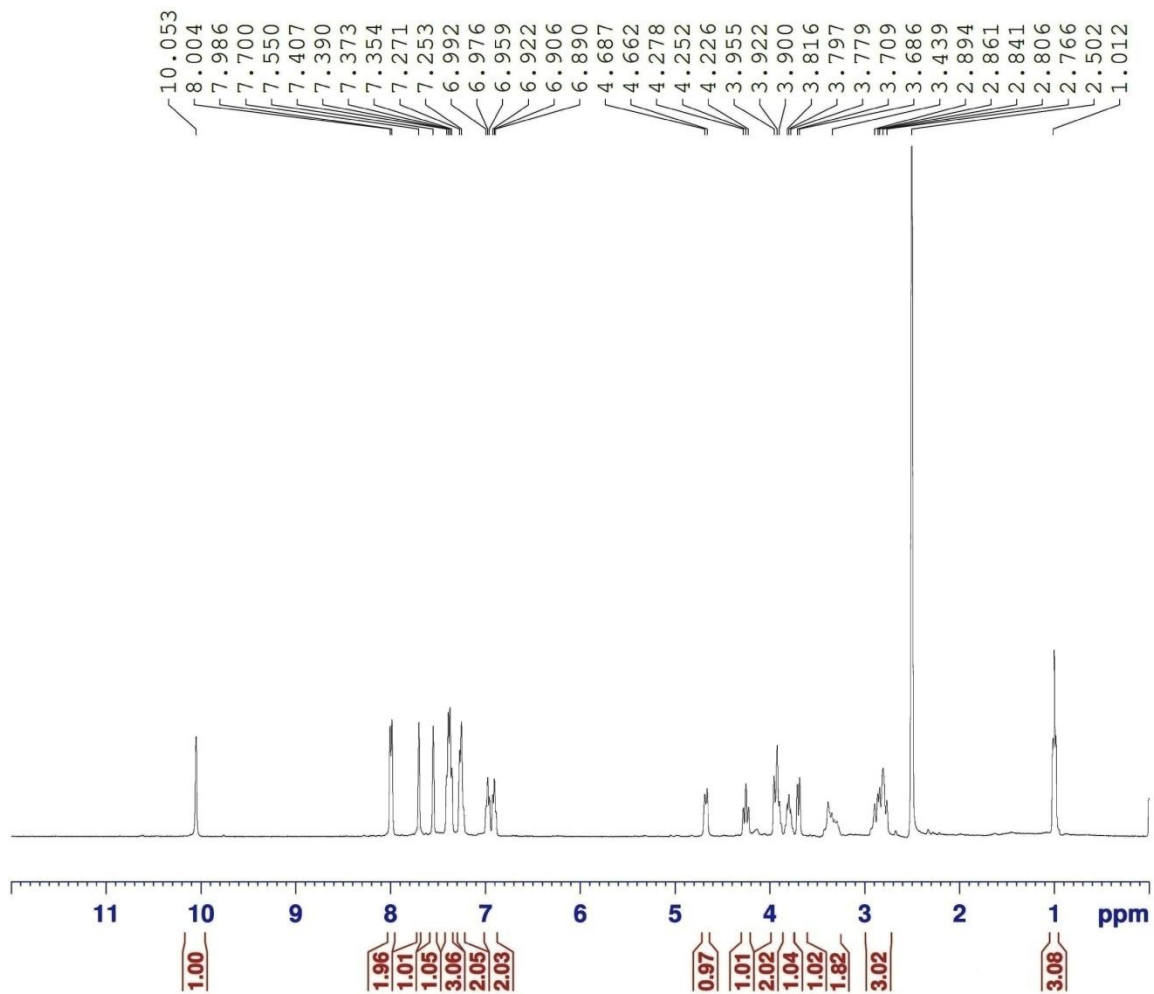

$^{13}\text{C}$  NMR of **4d** in  $\text{DMSO-d}_6$

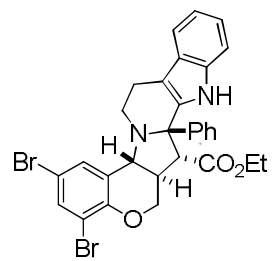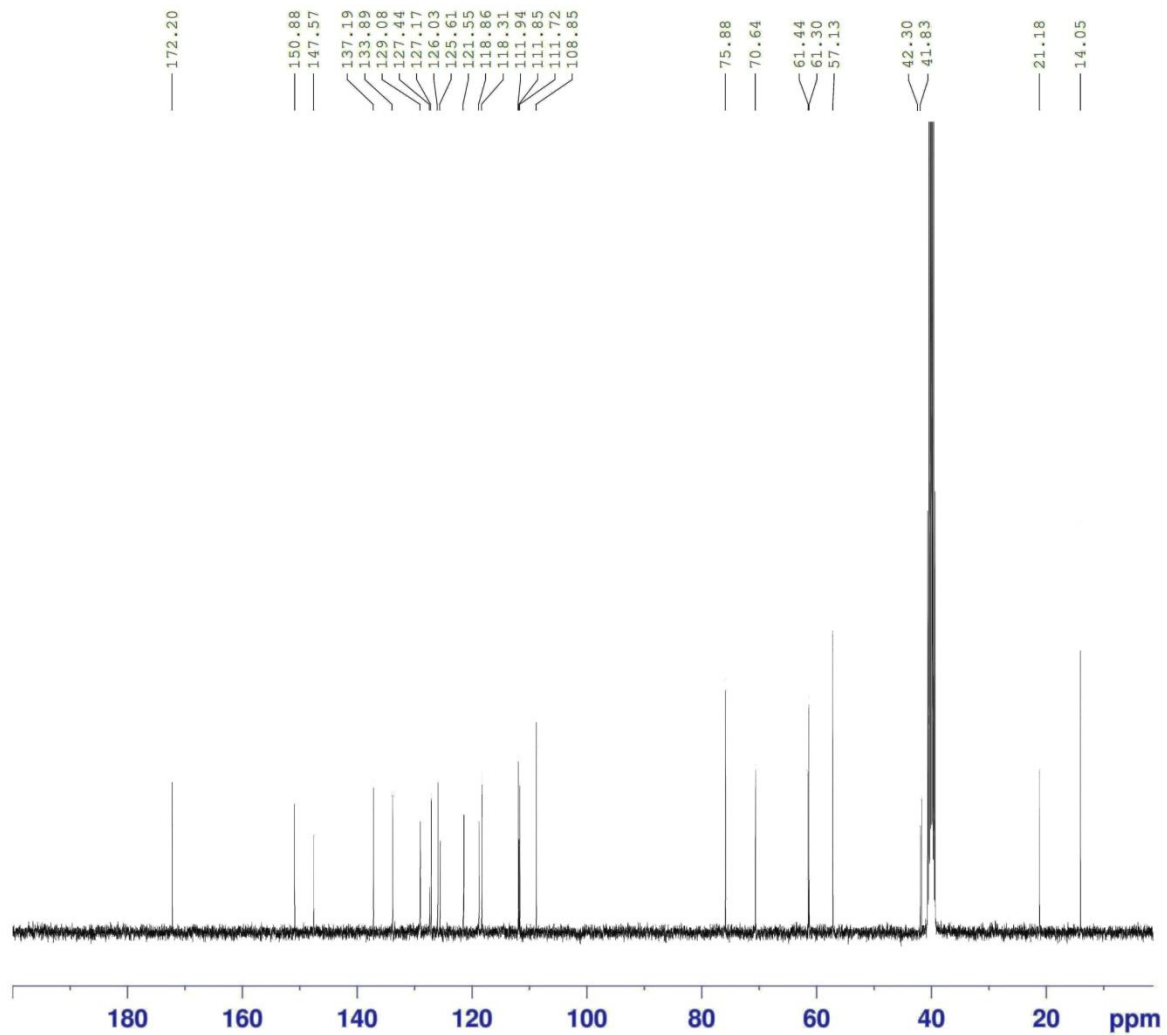

$^1\text{H}$  NMR of **4e** in  $\text{DMSO-d}_6$

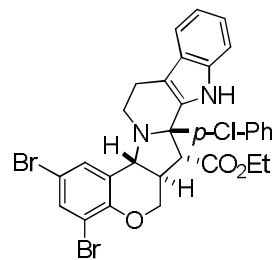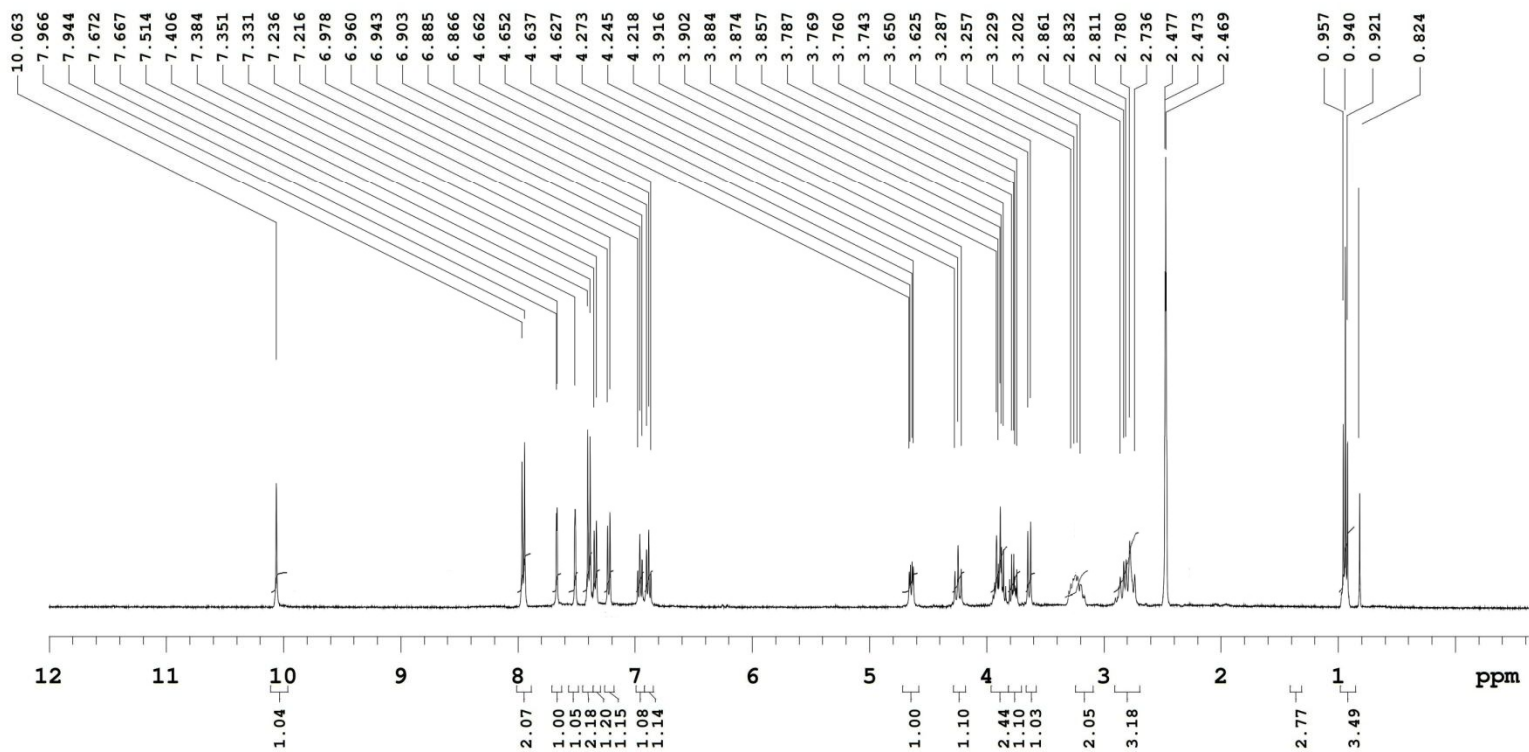



<sup>13</sup>C NMR of **4e** in DMSO-d<sub>6</sub>

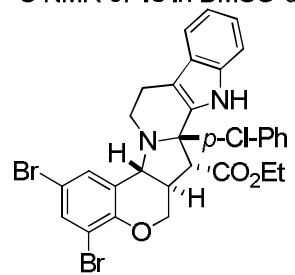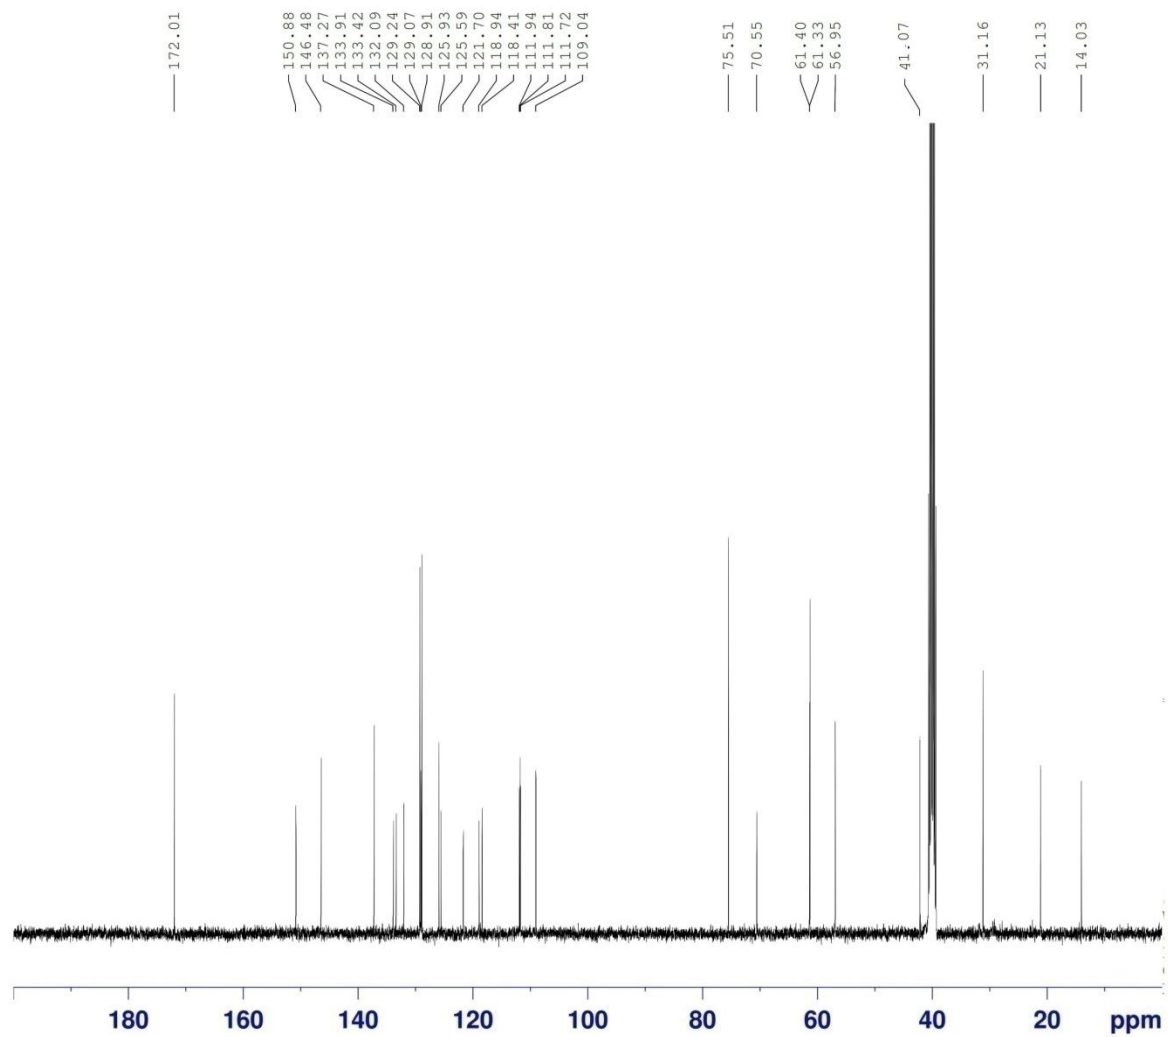

$^1\text{H}$  NMR of **4f** in  $\text{DMSO-d}_6$

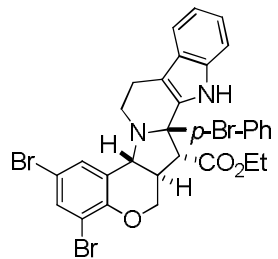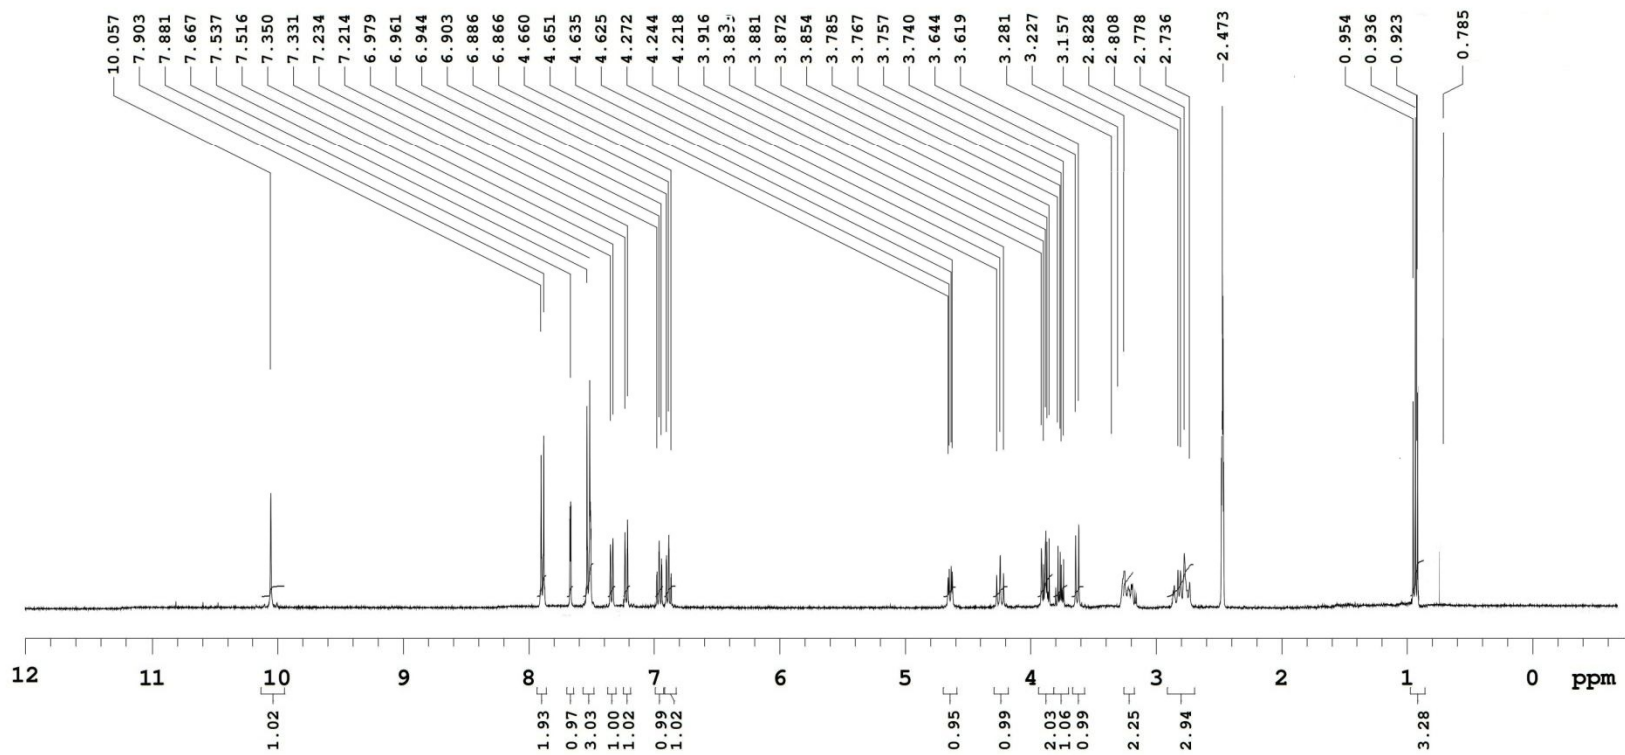

<sup>13</sup>C NMR of **4f** in DMSO-d<sub>6</sub>

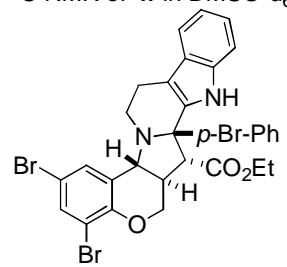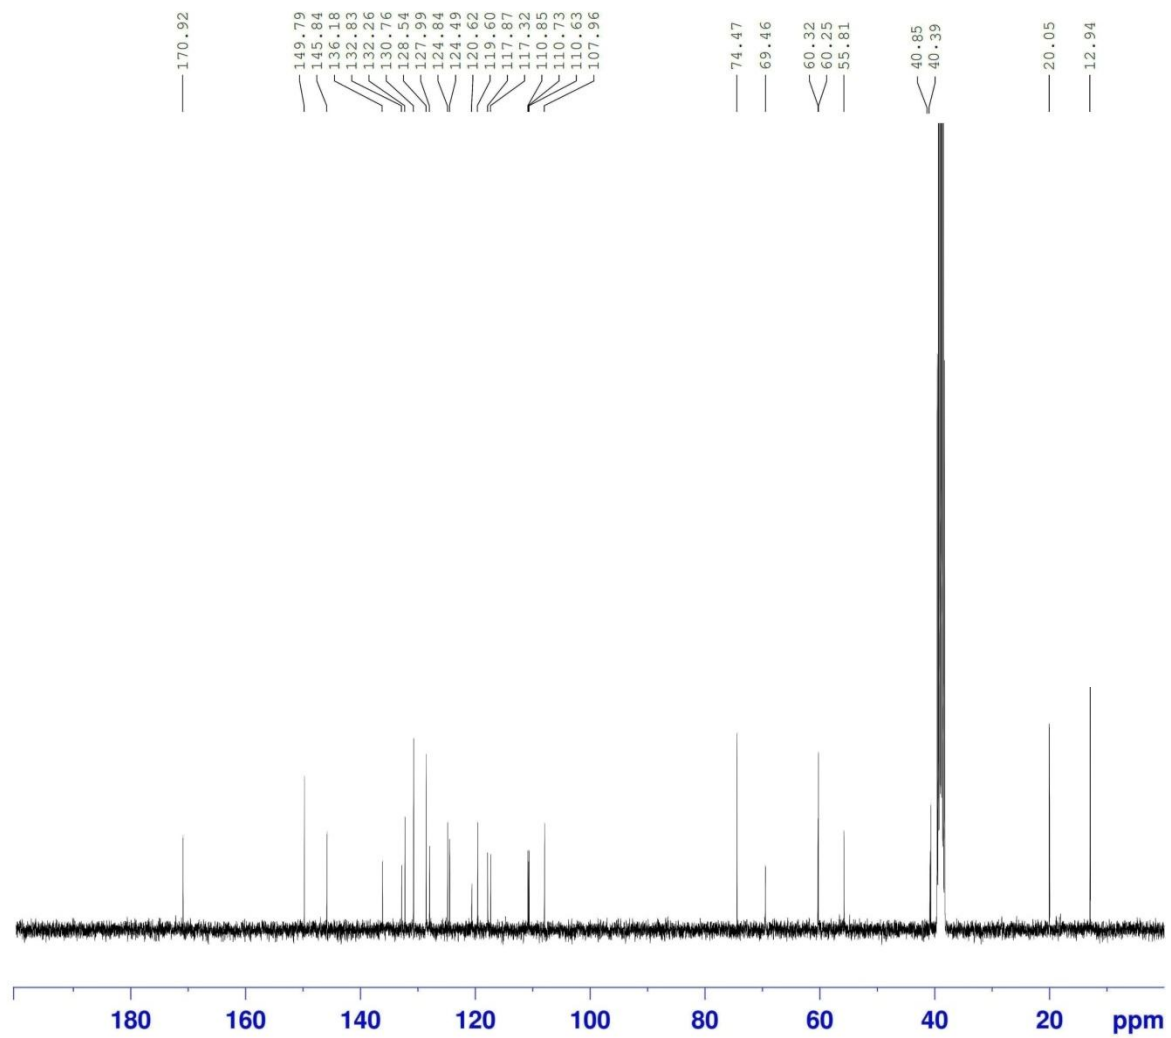

<sup>1</sup>H NMR of **4g** in DMSO-d<sub>6</sub>

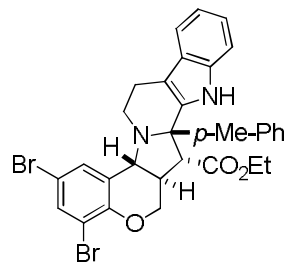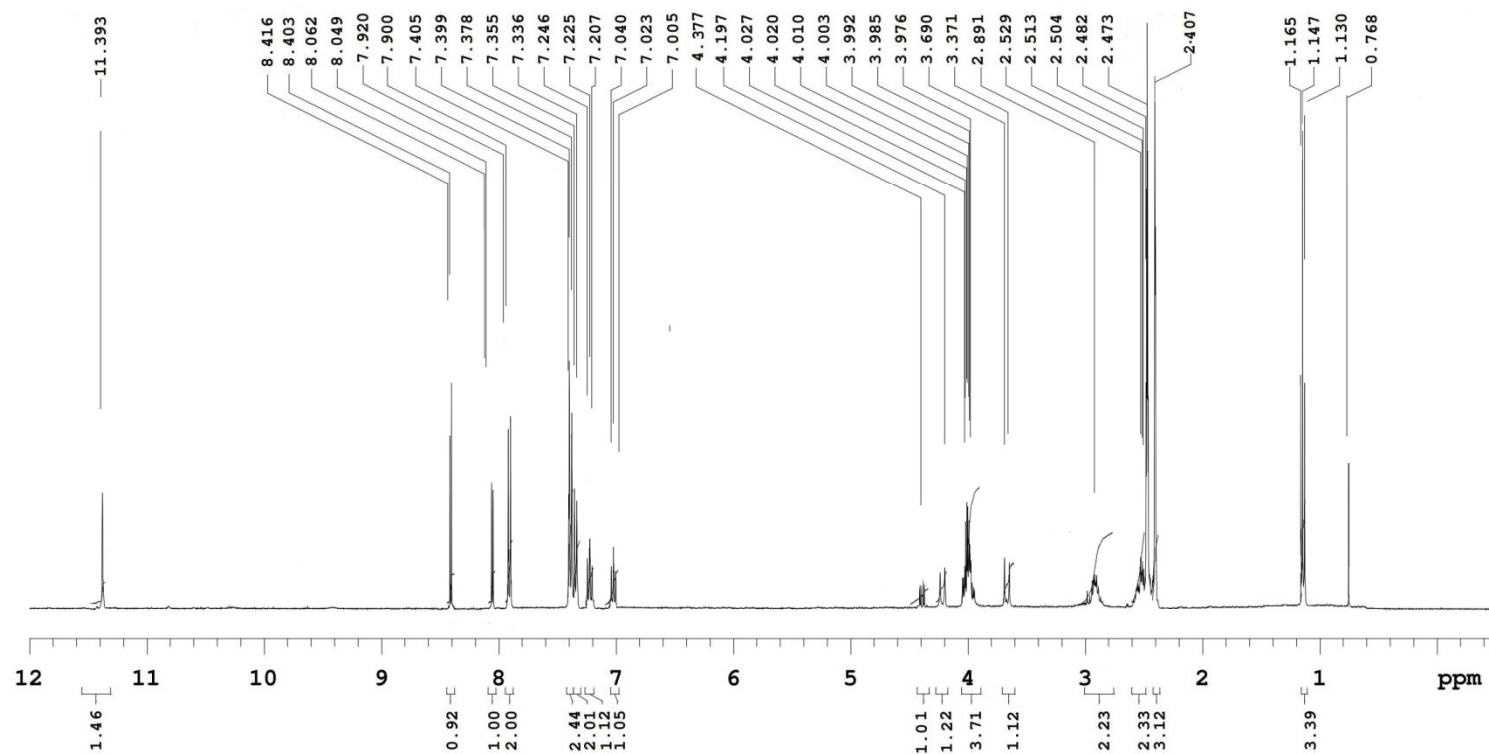

<sup>13</sup>C NMR of **4g** in DMSO-d<sub>6</sub>

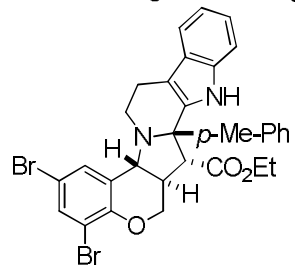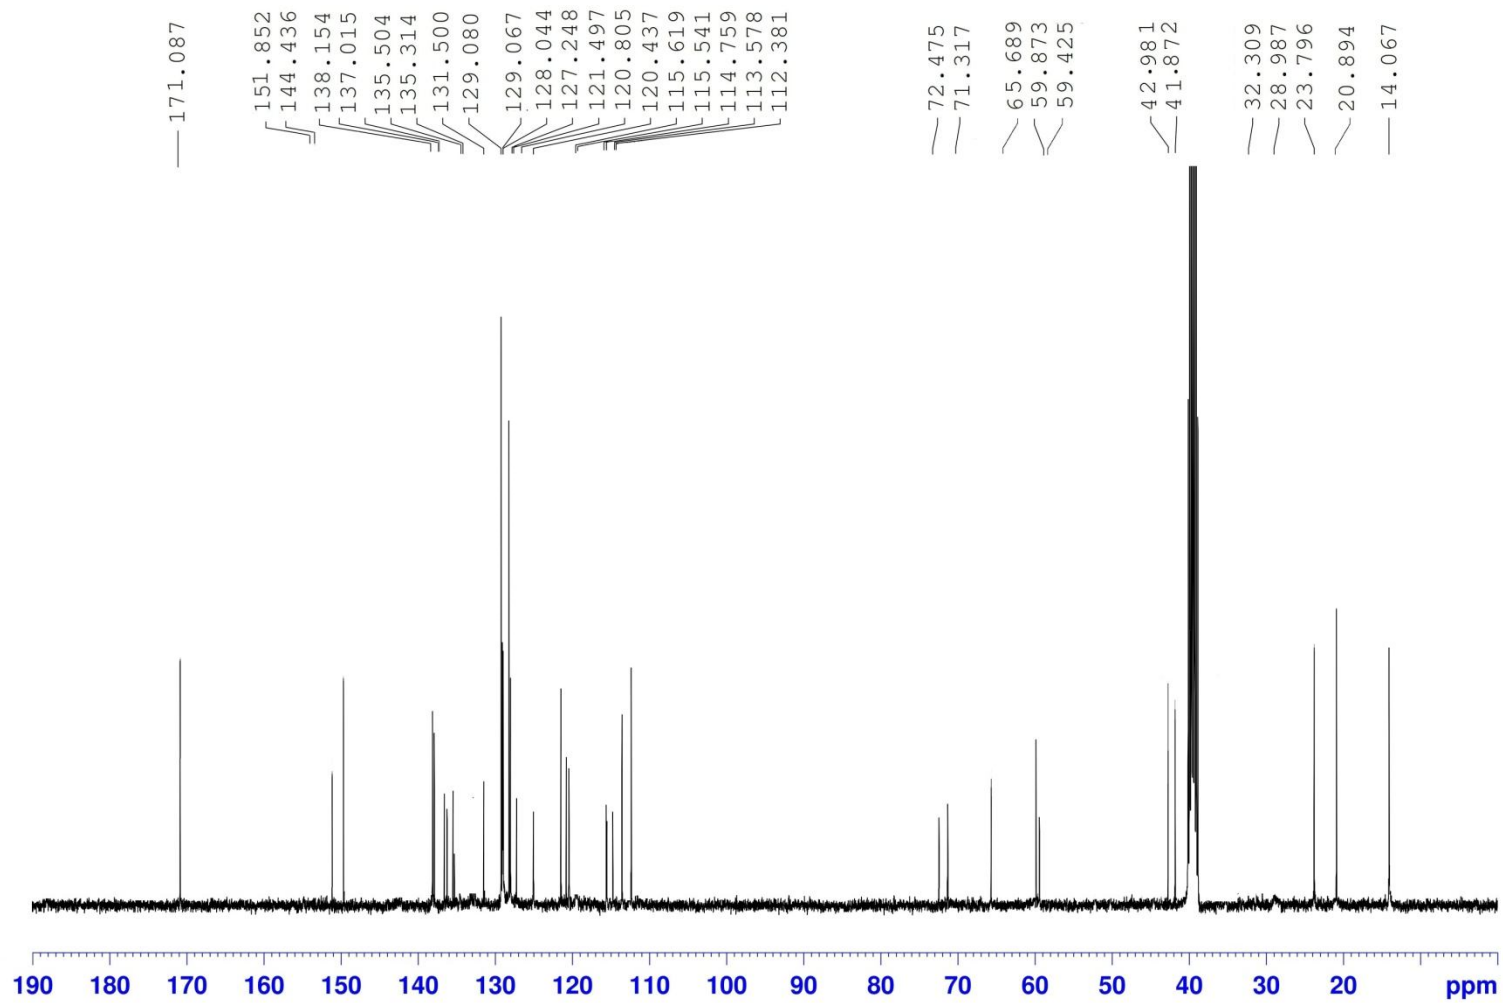

<sup>1</sup>H NMR of **4h** in DMSO-d<sub>6</sub>

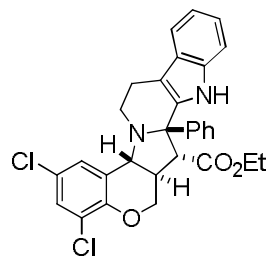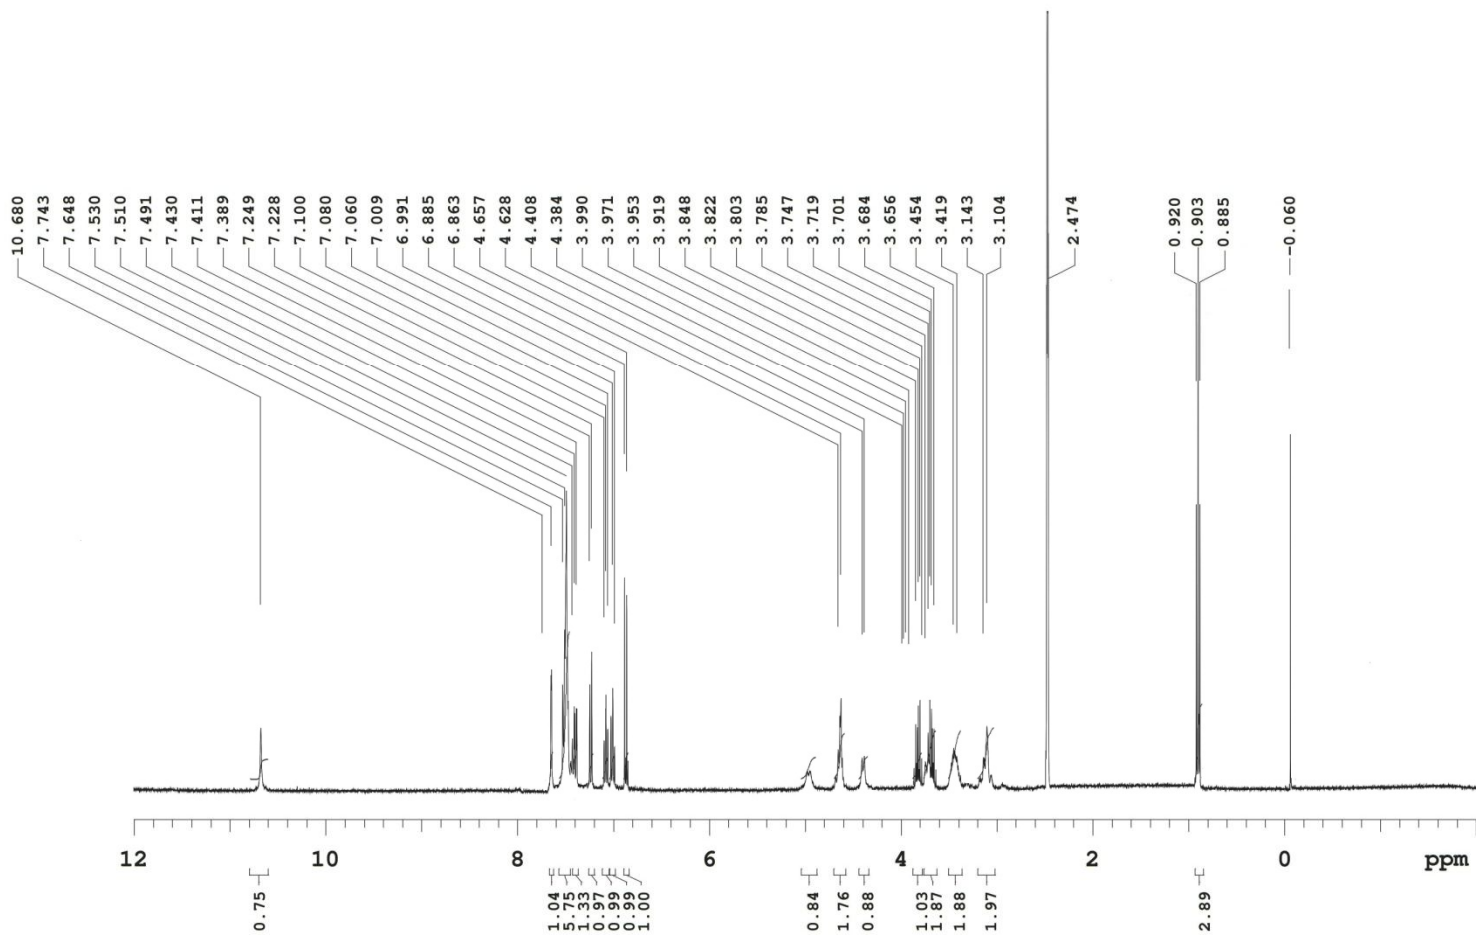

<sup>13</sup>C NMR of 4h in CDCl<sub>3</sub>

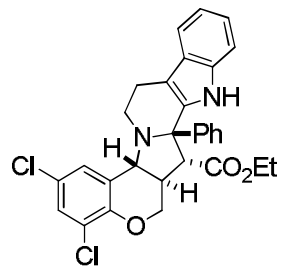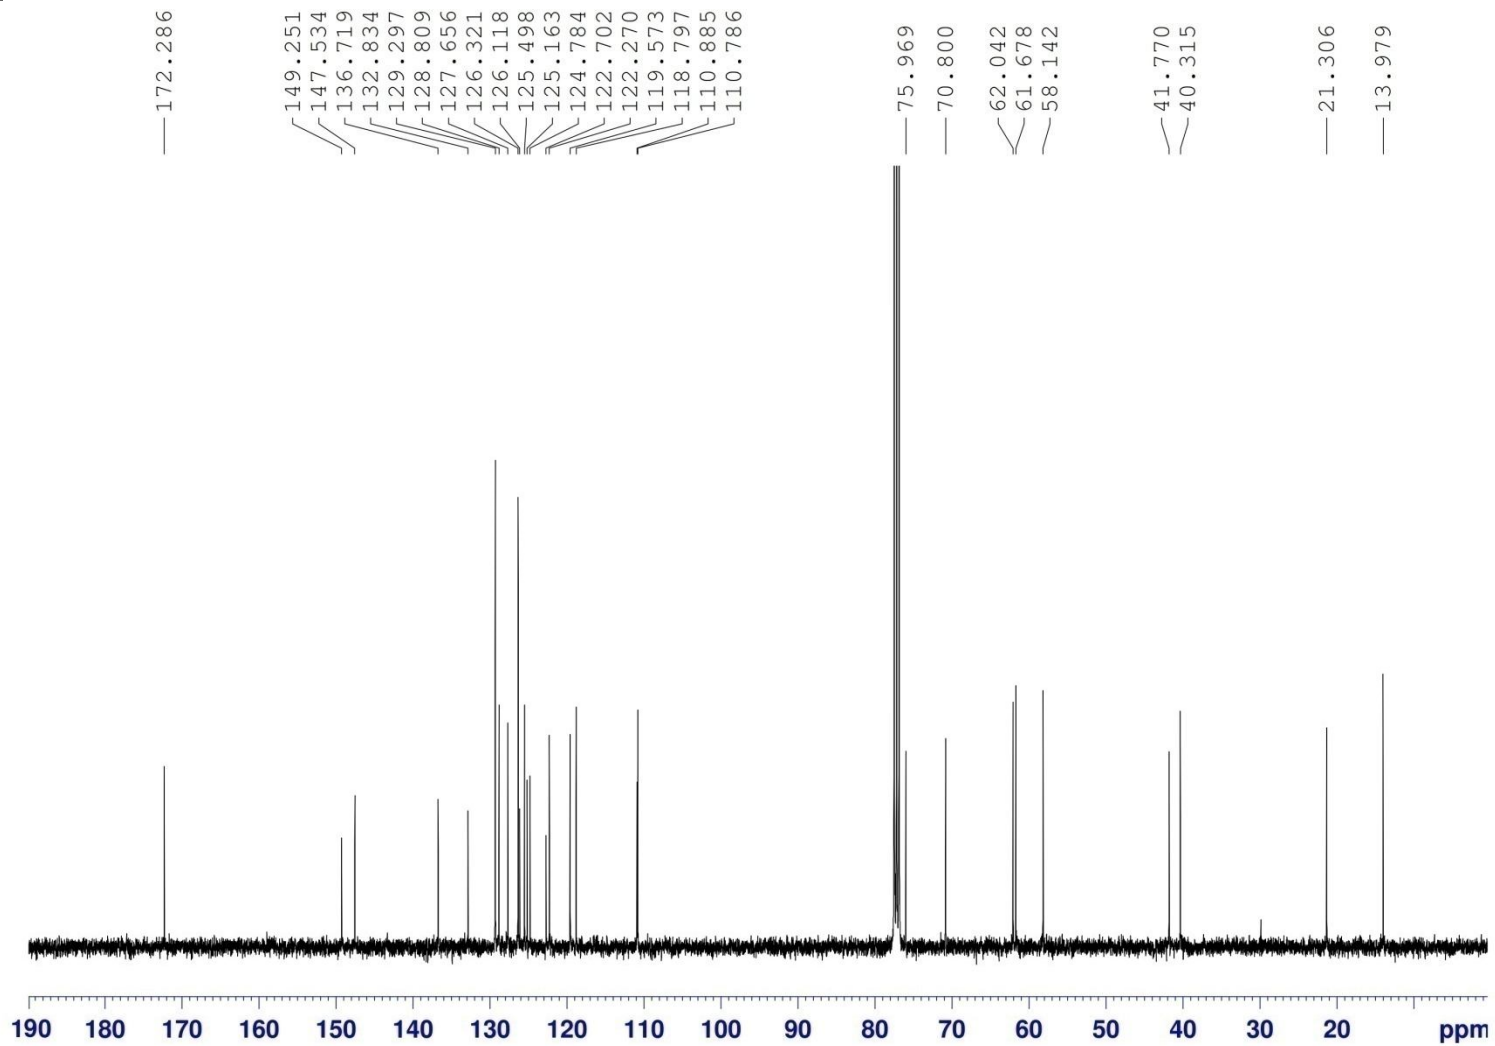

<sup>1</sup>H NMR of **4i** in DMSO-d<sub>6</sub>

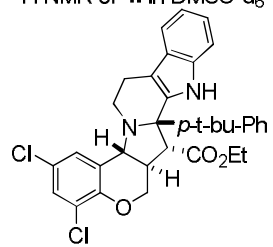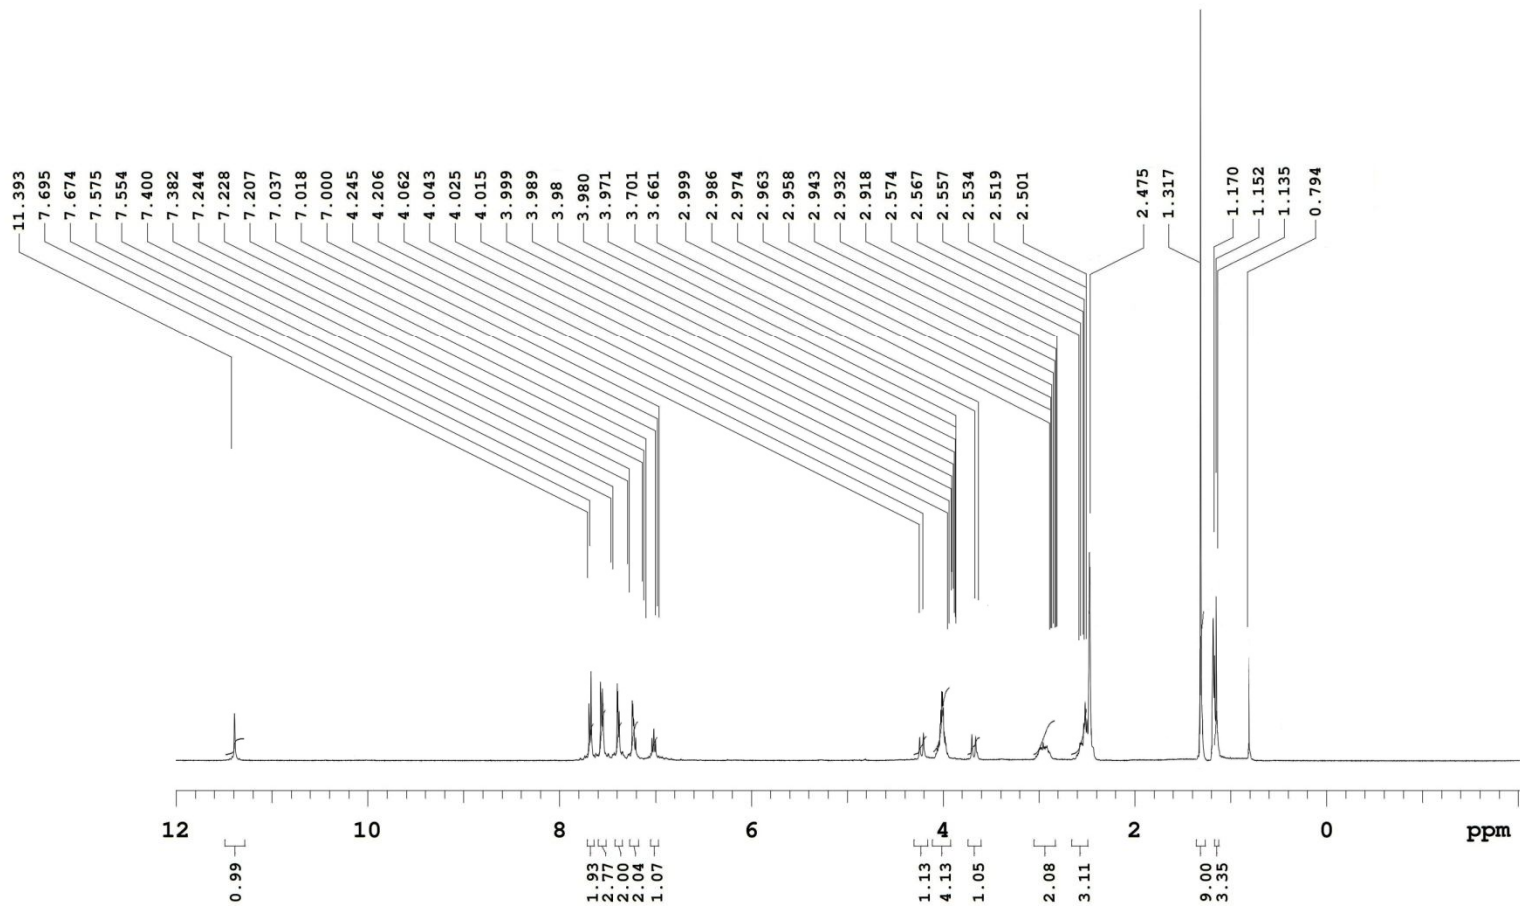



$^{13}\text{C}$  NMR of **4i** in  $\text{DMSO-d}_6$

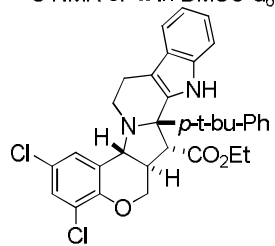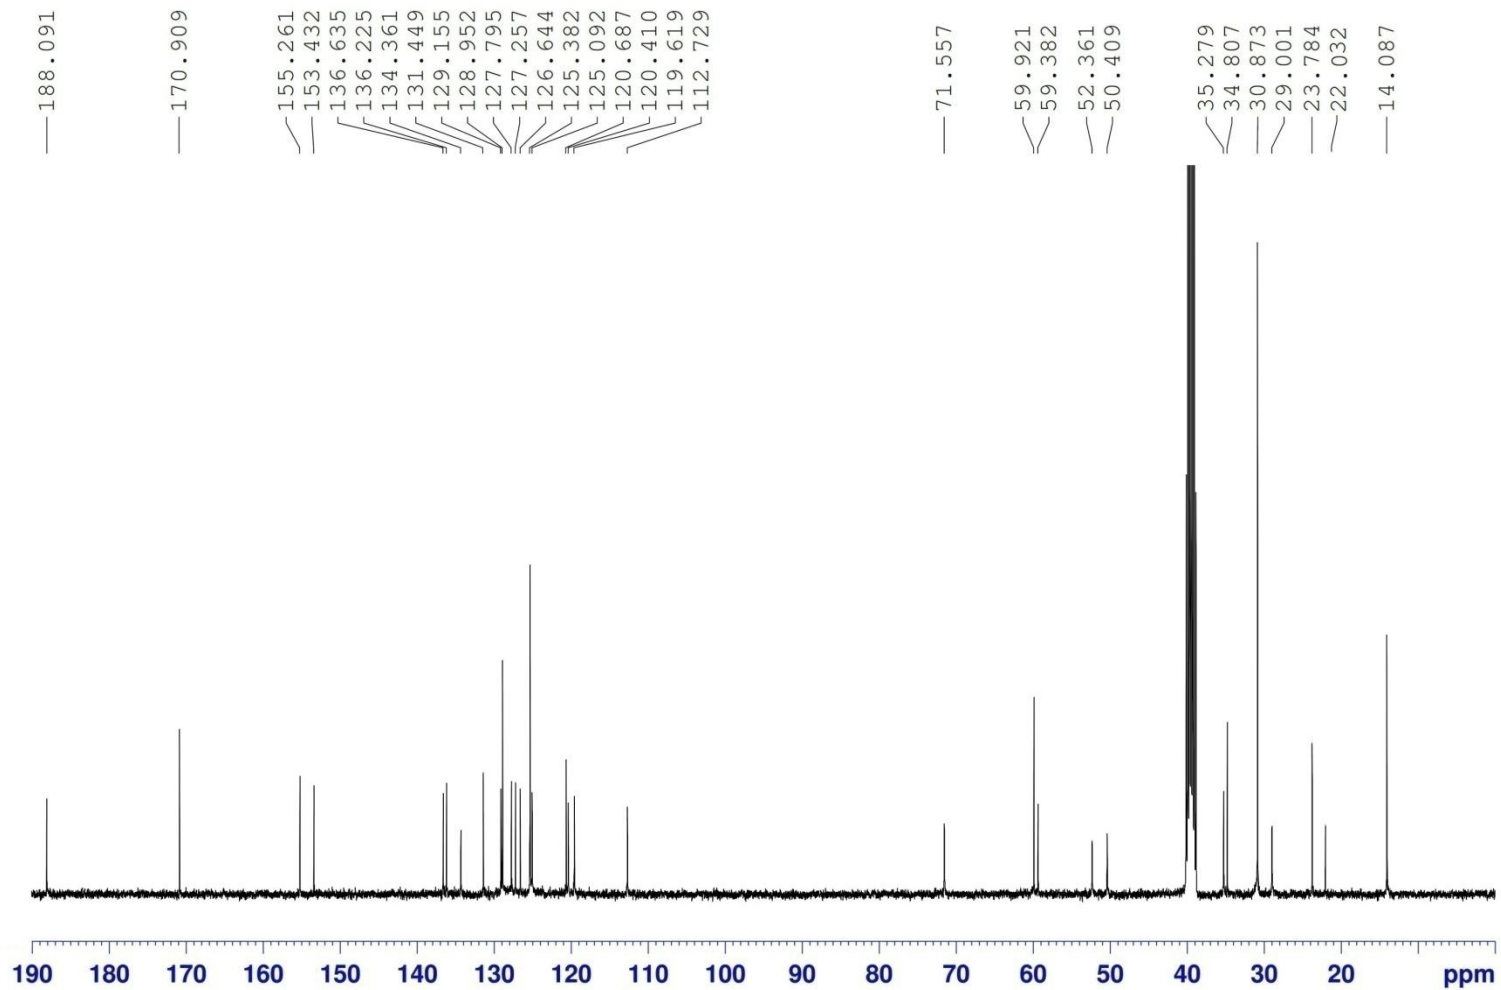

<sup>1</sup>H NMR of **4j** in DMSO-d<sub>6</sub>

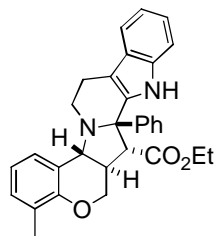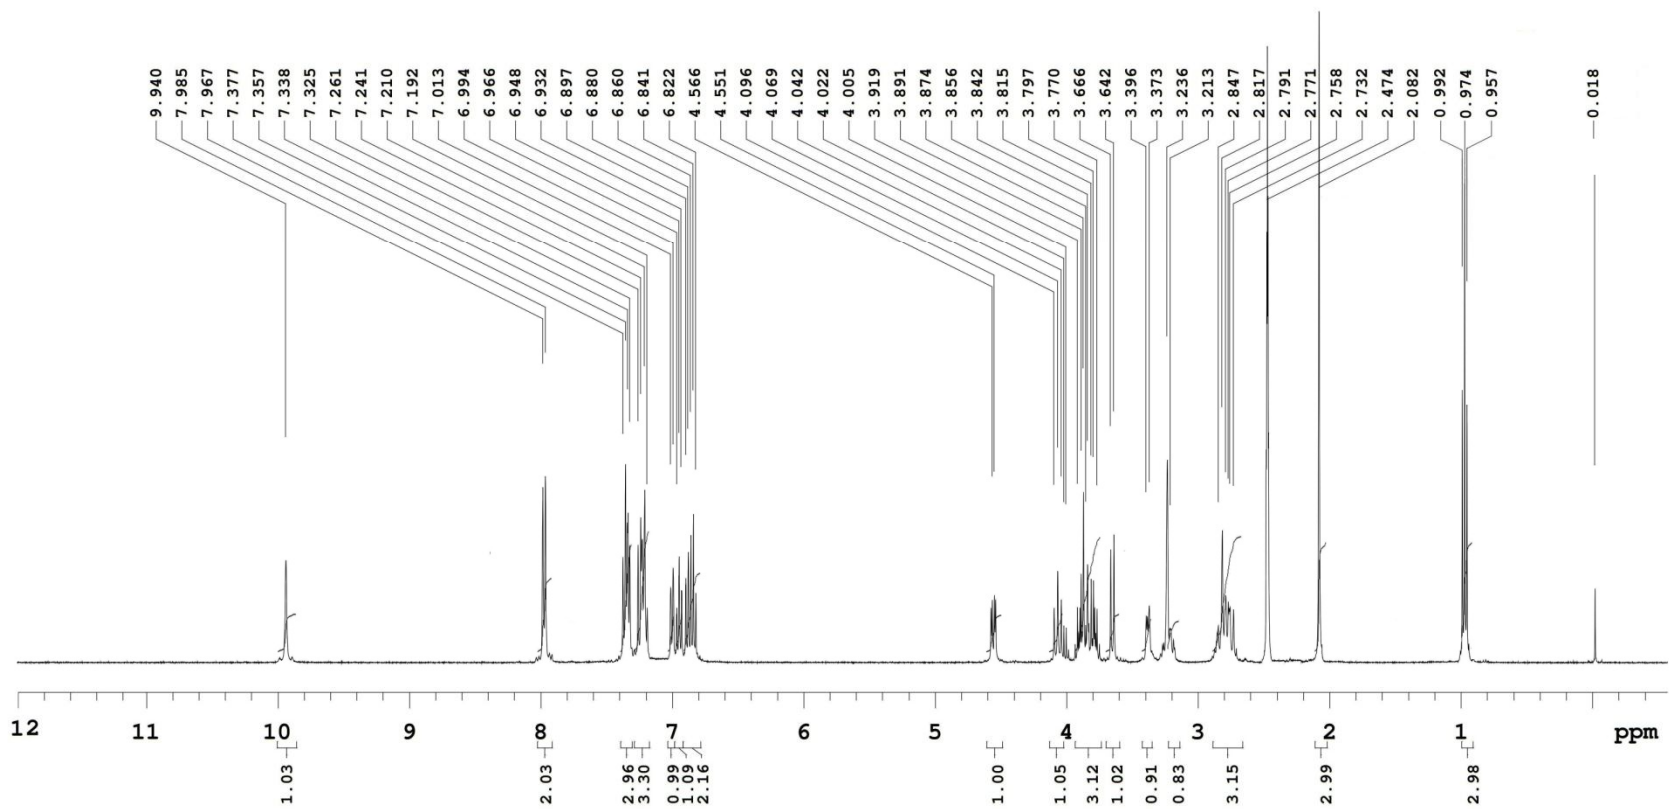

<sup>13</sup>C NMR of **4j** in CDCl<sub>3</sub>

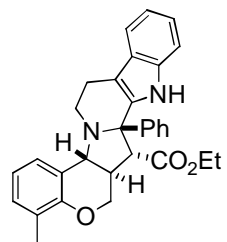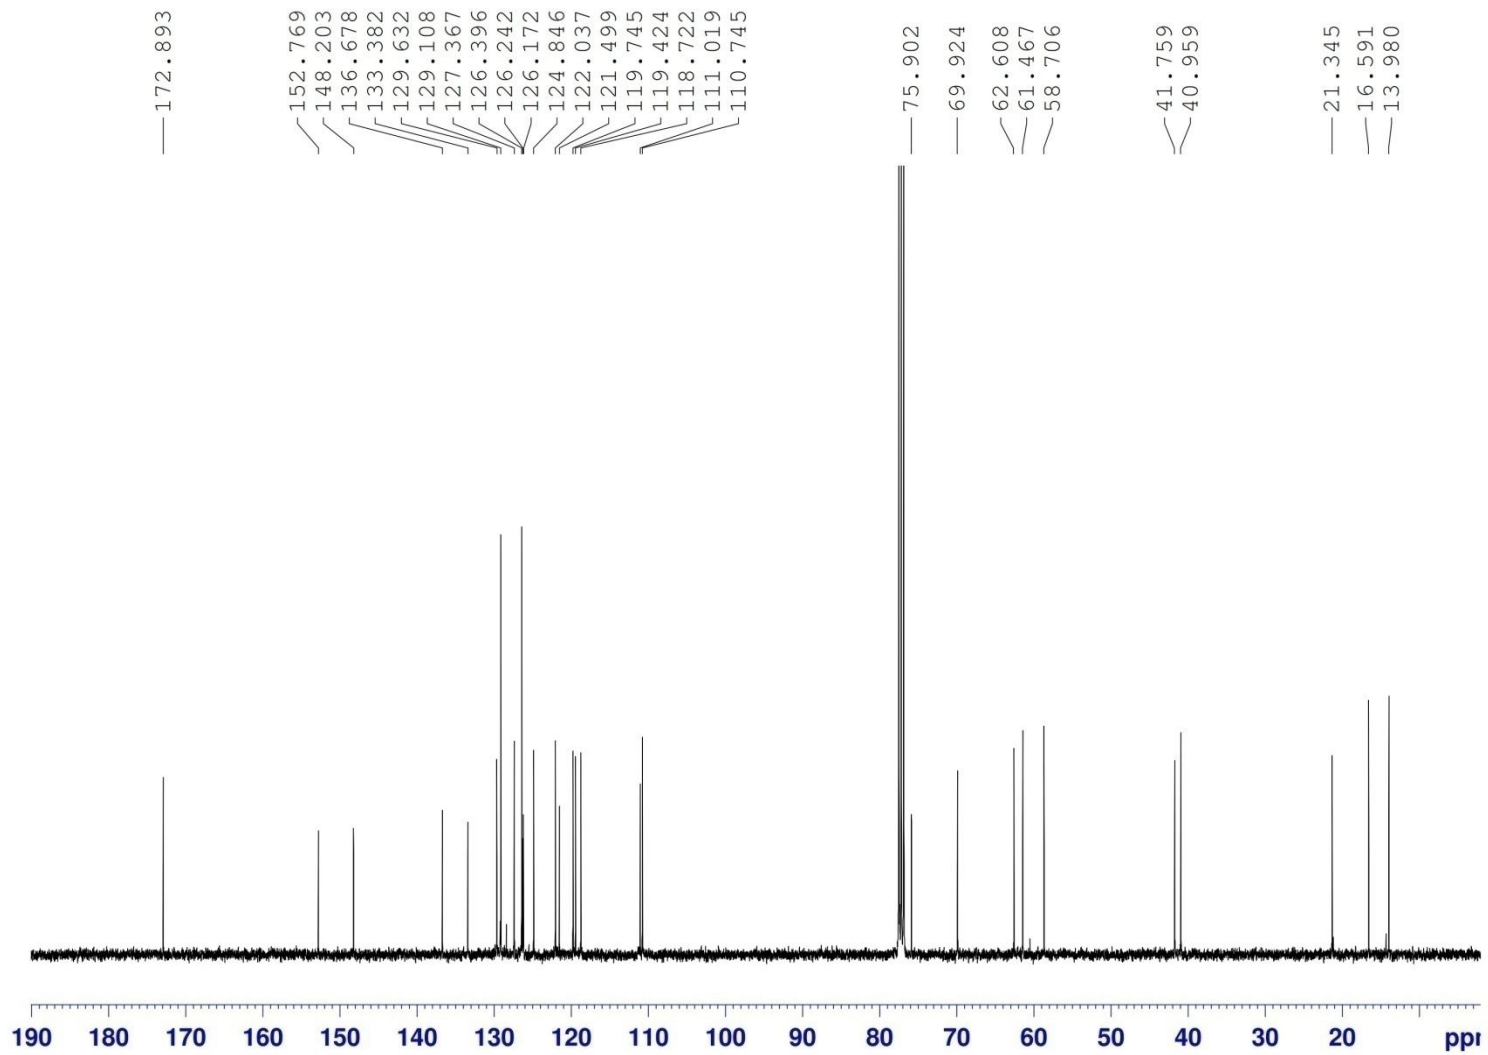

$^1\text{H}$  NMR of **4k** in  $\text{DMSO-d}_6$

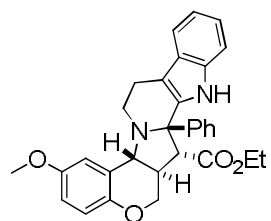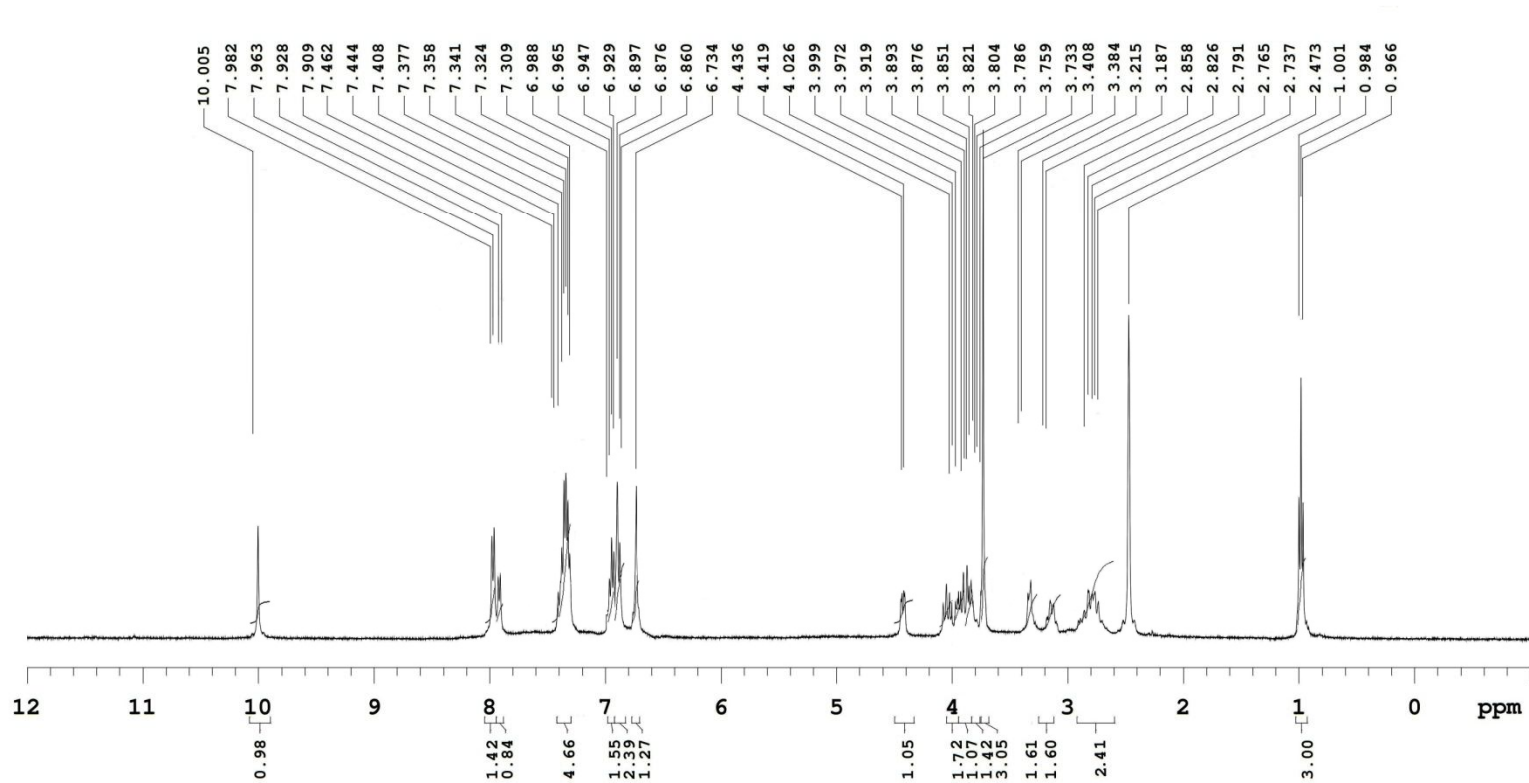

$^{13}\text{C}$  NMR of **4k** in  $\text{CDCl}_3$

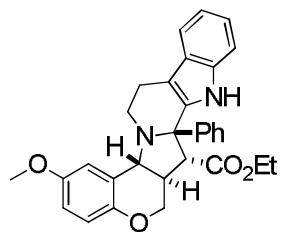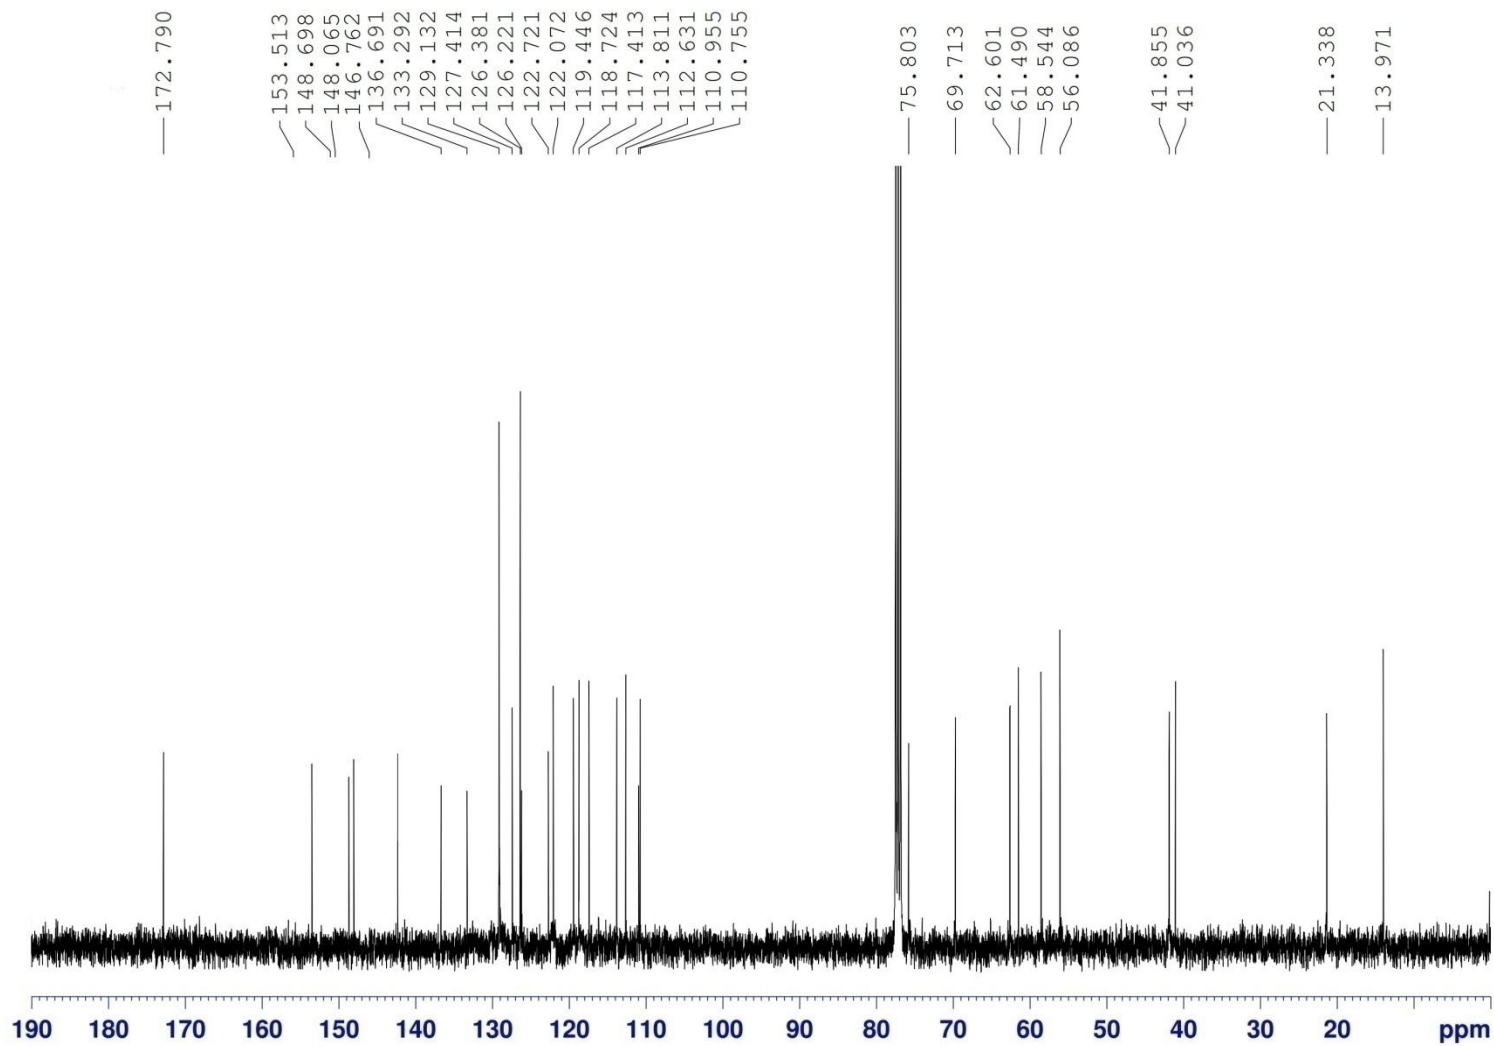

<sup>1</sup>H NMR of **4I** in DMSO-d<sub>6</sub>

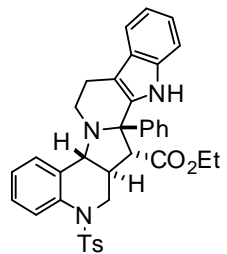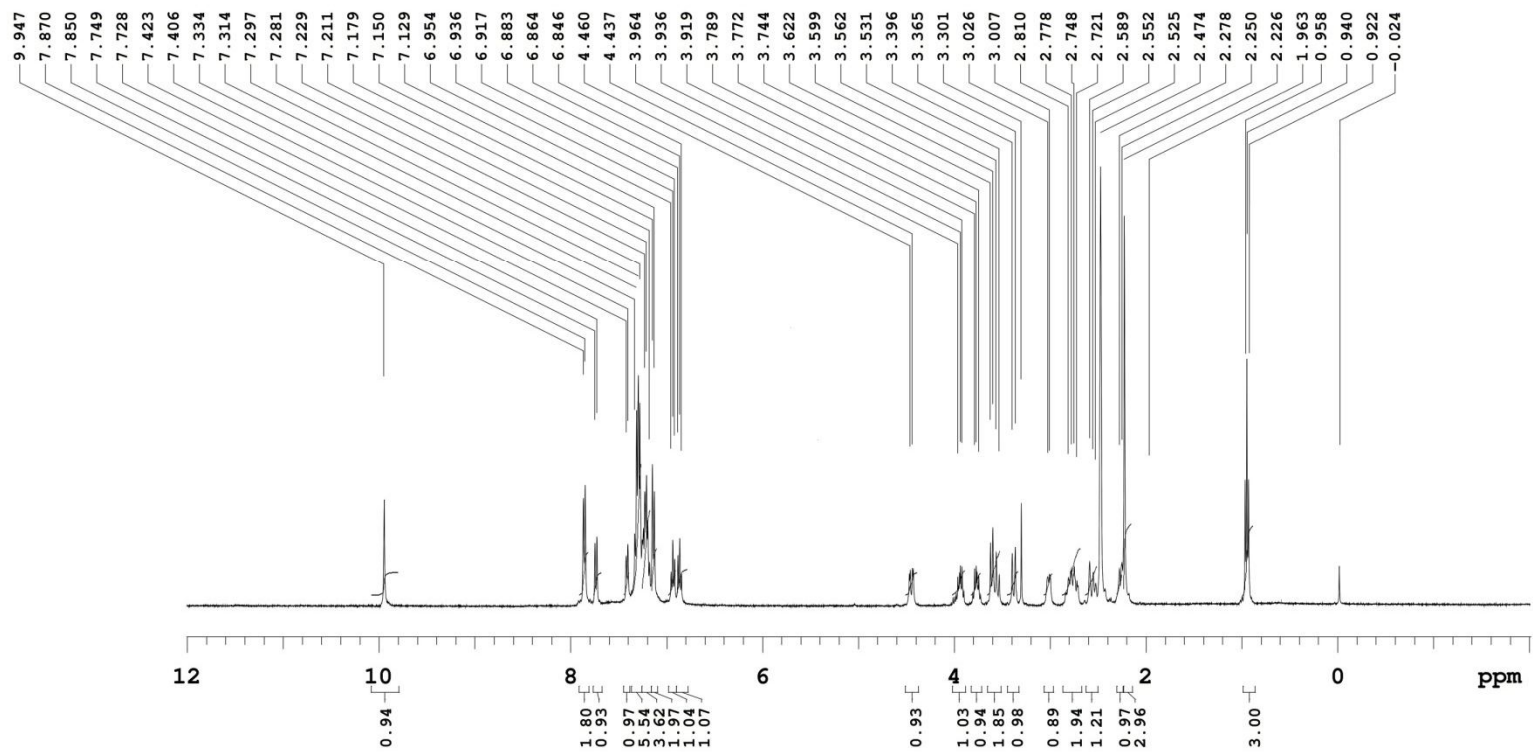

$^{13}\text{C}$  NMR of **4I** in  $\text{CDCl}_3$

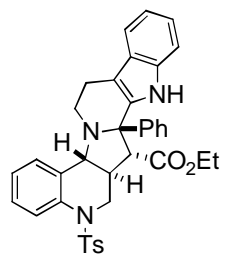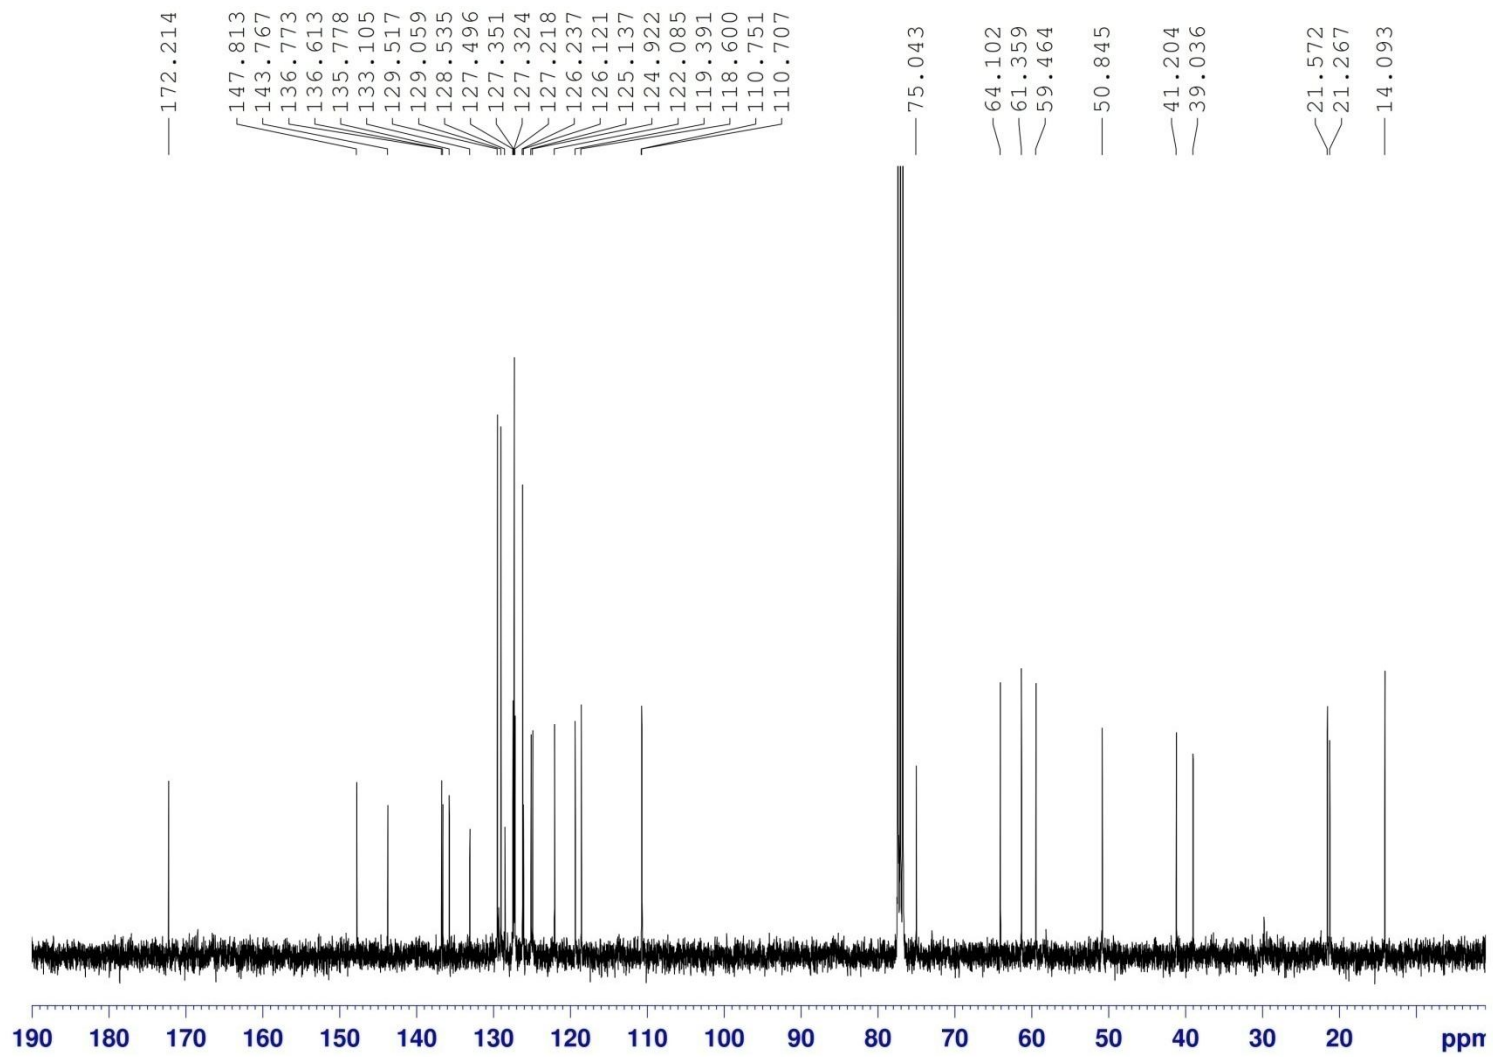

Supplement: c5nj01706h7.pdf [file c5nj01706h7.pdf]
