# Supplementary material for: Highly diastereoselective synthesis of polycyclic amines via redox neutral C–H functionalization
Source: Royal Society of Chemistry journal article supplement (doi:10.1039/c5nj01706h), 2015-01-01
Supplement: c5nj01706h2.pdf [file c5nj01706h2.pdf]

Table 1: Crystal data and structure refinement details.

|                                    |                                                                      |                             |  |
|------------------------------------|----------------------------------------------------------------------|-----------------------------|--|
| Empirical formula                  | $C_{30}H_{28}Br_2NO_5$                                               |                             |  |
| Formula weight                     | 642.35                                                               |                             |  |
| Temperature                        | 296(2) K                                                             |                             |  |
| Wavelength                         | 1.54178 Å                                                            |                             |  |
| $\theta$ range for above           | 3.50° to 64.52°                                                      |                             |  |
| Crystal system                     | Triclinic                                                            |                             |  |
| Space group                        | $P - 1$                                                              |                             |  |
| Cell dimensions                    |                                                                      |                             |  |
| $a = 9.9779(11)$ Å                 | $b = 11.5105(12)$ Å                                                  | $c = 13.4027(14)$ Å         |  |
| $\alpha = 91.472(6)^\circ$         | $\beta = 107.929(6)^\circ$                                           | $\gamma = 109.296(6)^\circ$ |  |
| Volume                             | 1368.3(3) Å <sup>3</sup>                                             |                             |  |
| $Z$                                | 2                                                                    |                             |  |
| Density(calculated)                | 1.559 Mg m <sup>-3</sup>                                             |                             |  |
| Absorption coefficient             | 4.094 mm <sup>-1</sup>                                               |                             |  |
| $F_{000}$                          | 650                                                                  |                             |  |
| Crystal size                       | 0.25 × 0.25 × 0.25 mm                                                |                             |  |
| $\theta$ range for data collection | 3.50° to 64.52°                                                      |                             |  |
| Index ranges                       | $-11 \leq h \leq 11$<br>$-13 \leq k \leq 13$<br>$-15 \leq l \leq 14$ |                             |  |
| Reflections collected              | 13269                                                                |                             |  |
| Independent reflections            | 4454 [ $R_{int} = 0.0522$ ]                                          |                             |  |
| Refinement method                  | Full matrix least-squares on $F^2$                                   |                             |  |
| Data / restraints / parameters     | 4454 / 0 / 346                                                       |                             |  |
| Goodness-of-fit on $F^2$           | 1.041                                                                |                             |  |
| Final [ $I > 2\sigma(I)$ ]         | $R1 = 0.0609$ , $wR2 = 0.1680$                                       |                             |  |
| $R$ indices (all data)             | $R1 = 0.0758$ , $wR2 = 0.1850$                                       |                             |  |
| Largest diff. peak and hole        | 0.591 and $-0.556 e \text{ \AA}^{-3}$                                |                             |  |

Table 2: Atomic coordinates and equivalent thermal parameters of the non-hydrogen atoms.

| Atom | $x$        | $y$        | $z$        | $U_{\text{eq}}$ |
|------|------------|------------|------------|-----------------|
| Br1  | 0.81469(9) | 0.24281(7) | 0.25466(4) | 0.0768(3)       |
| C2   | 0.9232(6)  | 0.2883(5)  | 0.4022(4)  | 0.0523(12)      |
| C3   | 1.0708(7)  | 0.2946(5)  | 0.4393(4)  | 0.0634(14)      |
| C4   | 1.1500(6)  | 0.3276(6)  | 0.5467(4)  | 0.0648(15)      |
| C5   | 1.0816(6)  | 0.3531(5)  | 0.6163(4)  | 0.0530(12)      |
| O6   | 1.1715(4)  | 0.3848(4)  | 0.7209(3)  | 0.0685(11)      |
| C7   | 1.1134(5)  | 0.4155(5)  | 0.7999(4)  | 0.0550(12)      |
| C8   | 0.9463(5)  | 0.3471(4)  | 0.7668(3)  | 0.0411(10)      |
| C9   | 0.8620(5)  | 0.3793(4)  | 0.8337(3)  | 0.0395(9)       |
| C10  | 0.7043(5)  | 0.3737(4)  | 0.7478(3)  | 0.0363(9)       |
| C11  | 0.5649(5)  | 0.2959(4)  | 0.7720(3)  | 0.0384(9)       |
| C12  | 0.5438(5)  | 0.3310(4)  | 0.8646(3)  | 0.0436(10)      |
| C13  | 0.4155(6)  | 0.2724(5)  | 0.8871(4)  | 0.0493(11)      |
| C14  | 0.2980(6)  | 0.1749(5)  | 0.8144(4)  | 0.0523(12)      |
| C15  | 0.3190(6)  | 0.1352(5)  | 0.7238(4)  | 0.0528(12)      |
| C16  | 0.4533(5)  | 0.1946(4)  | 0.7024(3)  | 0.0432(10)      |
| C17  | 0.4746(5)  | 0.1495(4)  | 0.6037(4)  | 0.0485(11)      |
| C18  | 0.6410(5)  | 0.1900(4)  | 0.6187(3)  | 0.0415(10)      |
| N19  | 0.7070(4)  | 0.3276(3)  | 0.6431(2)  | 0.0347(7)       |
| C20  | 0.8702(5)  | 0.3800(4)  | 0.6594(3)  | 0.0373(9)       |
| C21  | 0.9318(5)  | 0.3465(4)  | 0.5785(3)  | 0.0405(10)      |
| C22  | 0.8540(5)  | 0.3154(4)  | 0.4701(3)  | 0.0454(10)      |
| C23  | 0.6951(5)  | 0.5039(4)  | 0.7387(3)  | 0.0342(9)       |
| C24  | 0.7783(5)  | 0.6081(4)  | 0.8140(3)  | 0.0444(10)      |
| C25  | 0.7552(6)  | 0.7196(4)  | 0.8024(4)  | 0.0519(12)      |
| C26  | 0.6462(5)  | 0.7287(4)  | 0.7135(3)  | 0.0433(10)      |
| C27  | 0.5602(6)  | 0.6269(4)  | 0.6373(3)  | 0.0491(11)      |
| C28  | 0.5855(6)  | 0.5161(4)  | 0.6496(3)  | 0.0455(10)      |
| Br29 | 0.60863(7) | 0.87909(5) | 0.69793(4) | 0.0650(3)       |
| C30  | 0.8472(5)  | 0.3015(4)  | 0.9213(3)  | 0.0441(10)      |
| O31  | 0.8673(4)  | 0.3421(3)  | 1.0093(2)  | 0.0598(9)       |
| O32  | 0.8152(5)  | 0.1812(3)  | 0.8903(3)  | 0.0694(11)      |
| C33  | 0.8062(10) | 0.0976(7)  | 0.9713(5)  | 0.090(2)        |
| C34  | 0.6577(12) | 0.0543(8)  | 0.9739(6)  | 0.112(3)        |
| O35  | 0.1704(4)  | 0.1259(4)  | 0.8383(3)  | 0.0742(12)      |
| C36  | 0.0430(7)  | 0.0430(6)  | 0.7606(6)  | 0.086(2)        |
| O37  | 0.3898(4)  | 0.3019(4)  | 0.9775(3)  | 0.0642(10)      |
| C38  | 0.5202(7)  | 0.3633(7)  | 1.0677(4)  | 0.0798(19)      |

Table 3: Anisotropic thermal parameters of the non-hydrogen atoms.

| Atom | $U_{11}$   | $U_{22}$   | $U_{33}$   | $U_{23}$   | $U_{13}$   | $U_{12}$    |
|------|------------|------------|------------|------------|------------|-------------|
| Br1  | 0.1042(6)  | 0.0965(5)  | 0.0485(4)  | 0.0537(4)  | 0.0316(4)  | 0.0129(3)   |
| C2   | 0.071(4)   | 0.054(3)   | 0.052(3)   | 0.034(3)   | 0.035(3)   | 0.020(2)    |
| C3   | 0.075(4)   | 0.073(3)   | 0.068(3)   | 0.038(3)   | 0.045(3)   | 0.022(3)    |
| C4   | 0.045(3)   | 0.093(4)   | 0.074(3)   | 0.037(3)   | 0.031(3)   | 0.022(3)    |
| C5   | 0.047(3)   | 0.061(3)   | 0.059(3)   | 0.024(2)   | 0.021(2)   | 0.020(2)    |
| O6   | 0.039(2)   | 0.111(3)   | 0.060(2)   | 0.034(2)   | 0.0135(17) | 0.014(2)    |
| C7   | 0.035(3)   | 0.072(3)   | 0.051(3)   | 0.018(2)   | 0.008(2)   | 0.002(2)    |
| C8   | 0.042(3)   | 0.041(2)   | 0.041(2)   | 0.0184(19) | 0.011(2)   | 0.0079(17)  |
| C9   | 0.039(2)   | 0.037(2)   | 0.039(2)   | 0.0138(18) | 0.0100(19) | 0.0051(17)  |
| C10  | 0.038(2)   | 0.038(2)   | 0.0328(19) | 0.0143(18) | 0.0104(18) | 0.0040(16)  |
| C11  | 0.038(2)   | 0.033(2)   | 0.044(2)   | 0.0133(18) | 0.0138(19) | 0.0105(17)  |
| C12  | 0.043(3)   | 0.043(2)   | 0.048(2)   | 0.016(2)   | 0.017(2)   | 0.0091(18)  |
| C13  | 0.049(3)   | 0.058(3)   | 0.052(3)   | 0.023(2)   | 0.025(2)   | 0.017(2)    |
| C14  | 0.045(3)   | 0.048(3)   | 0.071(3)   | 0.013(2)   | 0.031(3)   | 0.016(2)    |
| C15  | 0.038(3)   | 0.045(2)   | 0.066(3)   | 0.004(2)   | 0.017(2)   | 0.004(2)    |
| C16  | 0.040(3)   | 0.038(2)   | 0.053(2)   | 0.0134(19) | 0.018(2)   | 0.0077(18)  |
| C17  | 0.047(3)   | 0.041(2)   | 0.050(2)   | 0.008(2)   | 0.015(2)   | -0.0030(19) |
| C18  | 0.043(3)   | 0.035(2)   | 0.046(2)   | 0.0115(18) | 0.016(2)   | -0.0005(17) |
| N19  | 0.0347(19) | 0.0312(16) | 0.0377(17) | 0.0108(14) | 0.0124(15) | 0.0030(13)  |
| C20  | 0.032(2)   | 0.038(2)   | 0.042(2)   | 0.0120(17) | 0.0118(19) | 0.0073(16)  |
| C21  | 0.036(2)   | 0.043(2)   | 0.049(2)   | 0.0183(19) | 0.018(2)   | 0.0132(18)  |
| C22  | 0.046(3)   | 0.051(2)   | 0.047(2)   | 0.024(2)   | 0.019(2)   | 0.0135(19)  |
| C23  | 0.035(2)   | 0.034(2)   | 0.0357(19) | 0.0113(17) | 0.0150(18) | 0.0051(15)  |
| C24  | 0.043(3)   | 0.040(2)   | 0.043(2)   | 0.0184(19) | 0.001(2)   | 0.0016(18)  |
| C25  | 0.048(3)   | 0.038(2)   | 0.056(3)   | 0.010(2)   | 0.005(2)   | -0.0086(19) |
| C26  | 0.046(3)   | 0.040(2)   | 0.050(2)   | 0.019(2)   | 0.020(2)   | 0.0073(18)  |
| C27  | 0.051(3)   | 0.049(3)   | 0.044(2)   | 0.024(2)   | 0.005(2)   | 0.0047(19)  |
| C28  | 0.047(3)   | 0.044(2)   | 0.042(2)   | 0.019(2)   | 0.007(2)   | -0.0032(18) |
| Br29 | 0.0777(5)  | 0.0432(3)  | 0.0732(4)  | 0.0313(3)  | 0.0134(3)  | 0.0066(2)   |
| C30  | 0.048(3)   | 0.049(2)   | 0.037(2)   | 0.020(2)   | 0.013(2)   | 0.0077(18)  |
| O31  | 0.071(2)   | 0.064(2)   | 0.0369(17) | 0.0229(19) | 0.0096(16) | 0.0032(15)  |
| O32  | 0.121(3)   | 0.0490(19) | 0.0499(18) | 0.035(2)   | 0.039(2)   | 0.0185(15)  |
| C33  | 0.138(7)   | 0.071(4)   | 0.075(4)   | 0.034(4)   | 0.056(4)   | 0.030(3)    |
| C34  | 0.142(8)   | 0.100(6)   | 0.092(5)   | 0.034(5)   | 0.043(5)   | 0.039(5)    |
| O35  | 0.050(2)   | 0.077(3)   | 0.094(3)   | 0.006(2)   | 0.041(2)   | 0.012(2)    |
| C36  | 0.058(4)   | 0.062(4)   | 0.142(6)   | 0.009(3)   | 0.051(4)   | 0.006(4)    |
| O37  | 0.054(2)   | 0.089(3)   | 0.058(2)   | 0.0251(19) | 0.0317(18) | 0.0117(18)  |
| C38  | 0.077(4)   | 0.120(6)   | 0.052(3)   | 0.038(4)   | 0.031(3)   | 0.012(3)    |

Table 4: Bond lengths ( $\text{\AA}$ ).

| Atoms   | Length   | Atoms    | Length    |
|---------|----------|----------|-----------|
| Br1-C2  | 1.900(5) | C14-C15  | 1.385(7)  |
| C2-C3   | 1.377(8) | C15-C16  | 1.409(7)  |
| C2-C22  | 1.384(6) | C16-C17  | 1.508(6)  |
| C3-C4   | 1.384(8) | C17-C18  | 1.514(6)  |
| C4-C5   | 1.389(7) | C18-N19  | 1.483(5)  |
| C5-O6   | 1.373(6) | N19-C20  | 1.480(5)  |
| C5-C21  | 1.398(7) | C20-C21  | 1.498(6)  |
| O6-C7   | 1.441(6) | C21-C22  | 1.392(6)  |
| C7-C8   | 1.502(7) | C23-C24  | 1.382(6)  |
| C8-C9   | 1.517(6) | C23-C28  | 1.396(6)  |
| C8-C20  | 1.530(6) | C24-C25  | 1.381(7)  |
| C9-C30  | 1.510(6) | C25-C26  | 1.377(7)  |
| C9-C10  | 1.618(6) | C26-C27  | 1.374(6)  |
| C10-N19 | 1.499(5) | C26-Br29 | 1.892(4)  |
| C10-C11 | 1.520(6) | C27-C28  | 1.384(7)  |
| C10-C23 | 1.538(6) | C30-O31  | 1.189(5)  |
| C11-C16 | 1.385(6) | C30-O32  | 1.338(6)  |
| C11-C12 | 1.393(6) | O32-C33  | 1.473(6)  |
| C12-C13 | 1.365(6) | C33-C34  | 1.411(13) |
| C13-O37 | 1.369(6) | O35-C36  | 1.395(7)  |
| C13-C14 | 1.398(7) | O37-C38  | 1.426(7)  |
| C14-O35 | 1.352(6) |          |           |

Table 5: Bond angles ( $^{\circ}$ ).

| Atoms       | Angle    | Atoms        | Angle    |
|-------------|----------|--------------|----------|
| C3-C2-C22   | 121.2(5) | C11-C16-C15  | 119.5(4) |
| C3-C2-Br1   | 118.9(4) | C11-C16-C17  | 120.1(4) |
| C22-C2-Br1  | 119.9(4) | C15-C16-C17  | 120.4(4) |
| C2-C3-C4    | 119.0(5) | C16-C17-C18  | 109.9(4) |
| C3-C4-C5    | 120.7(5) | N19-C18-C17  | 108.4(4) |
| O6-C5-C4    | 115.3(5) | C20-N19-C18  | 114.0(3) |
| O6-C5-C21   | 124.3(4) | C20-N19-C10  | 101.0(3) |
| C4-C5-C21   | 120.3(5) | C18-N19-C10  | 112.1(3) |
| C5-O6-C7    | 120.2(4) | N19-C20-C21  | 120.9(4) |
| O6-C7-C8    | 110.3(4) | N19-C20-C8   | 104.9(3) |
| C7-C8-C9    | 117.9(4) | C21-C20-C8   | 110.1(4) |
| C7-C8-C20   | 109.0(4) | C22-C21-C5   | 118.6(4) |
| C9-C8-C20   | 101.7(3) | C22-C21-C20  | 125.2(4) |
| C30-C9-C8   | 115.0(4) | C5-C21-C20   | 116.2(4) |
| C30-C9-C10  | 115.1(3) | C2-C22-C21   | 120.3(5) |
| C8-C9-C10   | 104.0(3) | C24-C23-C28  | 116.9(4) |
| N19-C10-C11 | 112.8(3) | C24-C23-C10  | 126.0(4) |
| N19-C10-C23 | 106.2(3) | C28-C23-C10  | 117.0(4) |
| C11-C10-C23 | 106.2(3) | C25-C24-C23  | 122.1(4) |
| N19-C10-C9  | 105.4(3) | C26-C25-C24  | 119.7(4) |
| C11-C10-C9  | 114.4(3) | C27-C26-C25  | 120.0(4) |
| C23-C10-C9  | 111.6(3) | C27-C26-Br29 | 119.5(4) |
| C16-C11-C12 | 118.3(4) | C25-C26-Br29 | 120.4(3) |
| C16-C11-C10 | 122.4(4) | C26-C27-C28  | 119.6(4) |
| C12-C11-C10 | 119.2(4) | C27-C28-C23  | 121.7(4) |
| C13-C12-C11 | 122.6(4) | O31-C30-O32  | 123.3(4) |
| C12-C13-O37 | 125.0(5) | O31-C30-C9   | 124.4(4) |
| C12-C13-C14 | 119.6(4) | O32-C30-C9   | 112.3(3) |
| O37-C13-C14 | 115.4(4) | C30-O32-C33  | 116.8(4) |
| O35-C14-C15 | 124.6(5) | C34-C33-O32  | 109.0(7) |
| O35-C14-C13 | 116.7(4) | C14-O35-C36  | 118.3(5) |
| C15-C14-C13 | 118.7(4) | C13-O37-C38  | 116.2(4) |
| C14-C15-C16 | 121.1(5) |              |          |
