# Supplementary material for: Highly diastereoselective synthesis of polycyclic amines via redox neutral C–H functionalization
Source: Royal Society of Chemistry journal article supplement (doi:10.1039/c5nj01706h), 2015-01-01
Supplement: c5nj01706h3.pdf [file c5nj01706h3.pdf]

Table 1: Crystal data and structure refinement details **3P**.

|                                    |                                                                      |                        |  |
|------------------------------------|----------------------------------------------------------------------|------------------------|--|
| Empirical formula                  | $C_{35}H_{36}N_2O_6S_2$                                              |                        |  |
| Formula weight                     | 644.78                                                               |                        |  |
| Temperature                        | 296(2) K                                                             |                        |  |
| Wavelength                         | 1.54178 Å                                                            |                        |  |
| Refns. for cell determination      | 4501                                                                 |                        |  |
| $\theta$ range for above           | 2.62° to 64.92°                                                      |                        |  |
| Crystal system                     | Monoclinic                                                           |                        |  |
| Space group                        | $P21/c$                                                              |                        |  |
| Cell dimensions                    |                                                                      |                        |  |
| $a = 17.5740(17)$ Å                | $b = 8.9640(9)$ Å                                                    | $c = 20.843(2)$ Å      |  |
| $\alpha = 90.00^\circ$             | $\beta = 106.682(4)^\circ$                                           | $\gamma = 90.00^\circ$ |  |
| Volume                             | 3145.3(5) Å <sup>3</sup>                                             |                        |  |
| $Z$                                | 4                                                                    |                        |  |
| Density(calculated)                | 1.362 Mg m <sup>-3</sup>                                             |                        |  |
| Absorption coefficient             | 1.943 mm <sup>-1</sup>                                               |                        |  |
| $F_{000}$                          | 1360                                                                 |                        |  |
| Crystal size                       | 0.27 × 0.27 × 0.27 mm                                                |                        |  |
| $\theta$ range for data collection | 2.62° to 64.92°                                                      |                        |  |
| Index ranges                       | $-20 \leq h \leq 20$<br>$-10 \leq k \leq 10$<br>$-24 \leq l \leq 20$ |                        |  |
| Reflections collected              | 14873                                                                |                        |  |
| Independent reflections            | 5126 [ $R_{\text{int}} = 0.0399$ ]                                   |                        |  |
| Absorption correction              | multi-scan                                                           |                        |  |
| Refinement method                  | Full matrix least-squares on $F^2$                                   |                        |  |
| Data / restraints / parameters     | 5126 / 0 / 410                                                       |                        |  |
| Goodness-of-fit on $F^2$           | 1.078                                                                |                        |  |
| Final [ $I > 2\sigma(I)$ ]         | $R1 = 0.0545$ , $wR2 = 0.1671$                                       |                        |  |
| $R$ indices (all data)             | $R1 = 0.0596$ , $wR2 = 0.1727$                                       |                        |  |
| Largest diff. peak and hole        | 0.752 and $-0.630 e \text{ \AA}^{-3}$                                |                        |  |

Table 2: Bond lengths ( $\text{\AA}$ ).

| Atoms   | Length   | Atoms   | Length   |
|---------|----------|---------|----------|
| S36-O38 | 1.427(2) | C9-C10  | 1.532(3) |
| S36-O37 | 1.428(3) | C4-C5   | 1.404(3) |
| S36-N14 | 1.670(2) | C4-C3   | 1.501(3) |
| S36-C39 | 1.757(3) | C7-C8   | 1.378(3) |
| S26-C25 | 1.690(3) | C7-C6   | 1.407(4) |
| S26-C22 | 1.704(2) | C21-C20 | 1.503(3) |
| O33-C31 | 1.337(3) | C21-C12 | 1.504(3) |
| O33-C34 | 1.453(3) | C20-C19 | 1.388(4) |
| O27-C7  | 1.374(3) | C20-C15 | 1.406(4) |
| O27-C28 | 1.413(4) | C15-C16 | 1.404(4) |
| O29-C6  | 1.374(3) | C12-C13 | 1.516(3) |
| O29-C30 | 1.421(4) | C3-C2   | 1.513(3) |
| O32-C31 | 1.199(3) | C5-C6   | 1.373(4) |
| N1-C2   | 1.470(3) | C19-C18 | 1.384(4) |
| N1-C21  | 1.481(3) | C16-C17 | 1.375(5) |
| N1-C10  | 1.495(3) | C39-C44 | 1.389(5) |
| N14-C15 | 1.441(4) | C39-C40 | 1.391(4) |
| N14-C13 | 1.488(3) | C18-C17 | 1.372(5) |
| C23-C24 | 1.468(4) | C24-C25 | 1.343(5) |
| C23-C22 | 1.489(4) | C40-C41 | 1.373(4) |
| C22-C10 | 1.520(3) | C41-C42 | 1.383(5) |
| C11-C31 | 1.516(3) | C42-C43 | 1.390(4) |
| C11-C12 | 1.525(3) | C42-C45 | 1.504(5) |
| C11-C10 | 1.631(3) | C44-C43 | 1.364(5) |
| C9-C4   | 1.378(4) | C34-C35 | 1.476(5) |
| C9-C8   | 1.405(3) |         |          |

Table 3: Bond angles ( $^{\circ}$ ).

| Atoms       | Angle      | Atoms       | Angle      |
|-------------|------------|-------------|------------|
| O38-S36-O37 | 119.15(15) | O27-C7-C6   | 115.6(2)   |
| O38-S36-N14 | 108.23(13) | C8-C7-C6    | 119.2(2)   |
| O37-S36-N14 | 105.50(13) | C7-C8-C9    | 121.7(2)   |
| O38-S36-C39 | 108.73(14) | N1-C21-C20  | 119.4(2)   |
| O37-S36-C39 | 109.01(14) | N1-C21-C12  | 104.31(18) |
| N14-S36-C39 | 105.36(12) | C20-C21-C12 | 113.1(2)   |
| C25-S26-C22 | 92.12(14)  | C19-C20-C15 | 119.1(2)   |
| C31-O33-C34 | 116.0(2)   | C19-C20-C21 | 121.1(2)   |
| C7-O27-C28  | 117.2(2)   | C15-C20-C21 | 119.6(2)   |
| C6-O29-C30  | 116.5(2)   | C16-C15-C20 | 118.6(3)   |
| C2-N1-C21   | 113.04(19) | C16-C15-N14 | 120.5(2)   |
| C2-N1-C10   | 114.09(18) | C20-C15-N14 | 120.8(2)   |
| C21-N1-C10  | 101.74(18) | C21-C12-C13 | 108.1(2)   |
| C15-N14-C13 | 117.0(2)   | C21-C12-C11 | 101.79(19) |
| C15-N14-S36 | 118.49(18) | C13-C12-C11 | 120.4(2)   |
| C13-N14-S36 | 115.92(19) | N14-C13-C12 | 108.8(2)   |
| C24-C23-C22 | 105.0(2)   | C4-C3-C2    | 109.2(2)   |
| C23-C22-C10 | 127.8(2)   | N1-C2-C3    | 108.1(2)   |
| C23-C22-S26 | 113.36(17) | C6-C5-C4    | 122.0(2)   |
| C10-C22-S26 | 118.80(18) | C5-C6-O29   | 124.8(2)   |
| C31-C11-C12 | 111.7(2)   | C5-C6-C7    | 118.9(2)   |
| C31-C11-C10 | 115.72(19) | O29-C6-C7   | 116.2(2)   |
| C12-C11-C10 | 102.46(18) | C18-C19-C20 | 121.3(3)   |
| C4-C9-C8    | 119.0(2)   | C17-C16-C15 | 120.8(3)   |
| C4-C9-C10   | 121.8(2)   | C44-C39-C40 | 120.0(3)   |
| C8-C9-C10   | 119.1(2)   | C44-C39-S36 | 120.1(2)   |
| O32-C31-O33 | 123.7(2)   | C40-C39-S36 | 119.7(2)   |
| O32-C31-C11 | 125.5(2)   | C17-C18-C19 | 119.5(3)   |
| O33-C31-C11 | 110.7(2)   | C18-C17-C16 | 120.6(3)   |
| C9-C4-C5    | 119.1(2)   | C25-C24-C23 | 115.6(3)   |
| C9-C4-C3    | 120.9(2)   | C41-C40-C39 | 119.0(3)   |
| C5-C4-C3    | 120.0(2)   | C40-C41-C42 | 121.9(3)   |
| N1-C10-C22  | 106.51(18) | C41-C42-C43 | 117.9(3)   |
| N1-C10-C9   | 112.36(19) | C41-C42-C45 | 121.6(3)   |
| C22-C10-C9  | 109.27(19) | C43-C42-C45 | 120.5(3)   |
| N1-C10-C11  | 105.41(17) | C24-C25-S26 | 113.9(2)   |
| C22-C10-C11 | 107.80(19) | C43-C44-C39 | 119.7(3)   |
| C9-C10-C11  | 115.05(18) | C44-C43-C42 | 121.5(3)   |
| O27-C7-C8   | 125.2(2)   | O33-C34-C35 | 108.3(3)   |
