# Supplementary material for: Highly diastereoselective synthesis of polycyclic amines via redox neutral C–H functionalization
Source: Royal Society of Chemistry journal article supplement (doi:10.1039/c5nj01706h), 2015-01-01
Supplement: c5nj01706h4.pdf [file c5nj01706h4.pdf]

Table 1: Crystal data and structure refinement details **4C**.

|                                    |                                    |                            |  |
|------------------------------------|------------------------------------|----------------------------|--|
| Empirical formula                  | $C_{30}H_{26}BrClN_2O_3$           |                            |  |
| Formula weight                     | 577.89                             |                            |  |
| Temperature                        | 296(2) K                           |                            |  |
| Wavelength                         | 1.54178 Å                          |                            |  |
| Refns. for cell determination      | 4104                               |                            |  |
| $\theta$ range for above           | 6.72° to 64.51°                    |                            |  |
| Crystal system                     | Triclinic                          |                            |  |
| Space group                        | $P - 1$                            |                            |  |
| Cell dimensions                    |                                    |                            |  |
| $a = 9.5848(7)$ Å                  | $b = 11.0031(8)$ Å                 | $c = 14.0353(11)$ Å        |  |
| $\alpha = 87.764(2)^\circ$         | $\beta = 70.878(2)^\circ$          | $\gamma = 65.624(2)^\circ$ |  |
| Volume                             | 1265.88(16) Å <sup>3</sup>         |                            |  |
| $Z$                                | 2                                  |                            |  |
| Density(calculated)                | 1.516 Mg m <sup>-3</sup>           |                            |  |
| Absorption coefficient             | 3.478 mm <sup>-1</sup>             |                            |  |
| $F_{000}$                          | 592                                |                            |  |
| Crystal size                       | 0.25 × 0.25 × 0.25 mm              |                            |  |
| $\theta$ range for data collection | 6.72° to 64.51°                    |                            |  |
| Index ranges                       | -11 ≤ $h$ ≤ 11                     |                            |  |
|                                    | -12 ≤ $k$ ≤ 12                     |                            |  |
|                                    | -16 ≤ $l$ ≤ 16                     |                            |  |
| Reflections collected              | 14548                              |                            |  |
| Independent reflections            | 4174 [ $R_{int} = 0.0313$ ]        |                            |  |
| Absorption correction              | multi-scan                         |                            |  |
| Refinement method                  | Full matrix least-squares on $F^2$ |                            |  |
| Data / restraints / parameters     | 4174 / 0 / 335                     |                            |  |
| Goodness-of-fit on $F^2$           | 1.103                              |                            |  |
| Final [ $I > 2\sigma(I)$ ]         | $R1 = 0.0331$ , $wR2 = 0.0959$     |                            |  |
| $R$ indices (all data)             | $R1 = 0.0335$ , $wR2 = 0.0965$     |                            |  |
| Largest diff. peak and hole        | 0.376 and -0.584 e Å <sup>-3</sup> |                            |  |

Table 2: Bond lengths ( $\text{\AA}$ ).

| Atoms   | Length   | Atoms    | Length   |
|---------|----------|----------|----------|
| Br1-C2  | 1.904(2) | C15-C16  | 1.406(3) |
| C2-C25  | 1.381(3) | C16-C17  | 1.384(3) |
| C2-C3   | 1.387(3) | C17-C18  | 1.402(3) |
| C3-C4   | 1.376(3) | C18-C19  | 1.435(3) |
| C4-C5   | 1.390(3) | C19-C20  | 1.495(3) |
| C5-O6   | 1.369(3) | C20-C21  | 1.532(3) |
| C5-C24  | 1.403(3) | C21-N22  | 1.484(2) |
| O6-C7   | 1.443(3) | N22-C23  | 1.478(3) |
| C7-C8   | 1.516(3) | C23-C24  | 1.499(3) |
| C8-C23  | 1.523(3) | C24-C25  | 1.395(3) |
| C8-C9   | 1.532(3) | C26-C31  | 1.387(3) |
| C9-C33  | 1.514(3) | C26-C27  | 1.397(3) |
| C9-C10  | 1.614(3) | C27-C28  | 1.386(3) |
| C10-N22 | 1.493(3) | C28-C29  | 1.387(3) |
| C10-C11 | 1.504(3) | C29-C30  | 1.381(3) |
| C10-C26 | 1.546(3) | C29-C132 | 1.741(2) |
| C11-C19 | 1.360(3) | C30-C31  | 1.395(3) |
| C11-N12 | 1.378(3) | C33-O34  | 1.209(3) |
| N12-C13 | 1.378(3) | C33-O35  | 1.334(2) |
| C13-C14 | 1.392(3) | O35-C36  | 1.456(2) |
| C13-C18 | 1.420(3) | C36-C37  | 1.506(3) |
| C14-C15 | 1.385(3) |          |          |

Table 3: Bond angles ( $^{\circ}$ ).

| Atoms       | Angle      | Atoms        | Angle      |
|-------------|------------|--------------|------------|
| C25-C2-C3   | 121.0(2)   | C17-C18-C13  | 118.72(19) |
| C25-C2-Br1  | 120.01(17) | C17-C18-C19  | 134.58(19) |
| C3-C2-Br1   | 118.95(17) | C13-C18-C19  | 106.68(17) |
| C4-C3-C2    | 119.3(2)   | C11-C19-C18  | 106.57(18) |
| C3-C4-C5    | 120.7(2)   | C11-C19-C20  | 121.23(18) |
| O6-C5-C4    | 115.67(19) | C18-C19-C20  | 132.19(18) |
| O6-C5-C24   | 124.4(2)   | C19-C20-C21  | 108.48(16) |
| C4-C5-C24   | 119.9(2)   | N22-C21-C20  | 109.64(16) |
| C5-O6-C7    | 118.03(16) | C23-N22-C21  | 115.14(15) |
| O6-C7-C8    | 108.07(17) | C23-N22-C10  | 100.67(14) |
| C7-C8-C23   | 109.03(16) | C21-N22-C10  | 114.62(15) |
| C7-C8-C9    | 120.24(17) | N22-C23-C24  | 120.64(17) |
| C23-C8-C9   | 101.80(16) | N22-C23-C8   | 104.31(15) |
| C33-C9-C8   | 111.98(16) | C24-C23-C8   | 110.13(16) |
| C33-C9-C10  | 114.35(15) | C25-C24-C5   | 118.84(19) |
| C8-C9-C10   | 102.51(15) | C25-C24-C23  | 123.36(19) |
| N22-C10-C11 | 109.88(16) | C5-C24-C23   | 117.67(18) |
| N22-C10-C26 | 107.57(15) | C2-C25-C24   | 120.1(2)   |
| C11-C10-C26 | 105.35(15) | C31-C26-C27  | 118.56(18) |
| N22-C10-C9  | 106.39(15) | C31-C26-C10  | 123.30(17) |
| C11-C10-C9  | 115.43(15) | C27-C26-C10  | 117.75(17) |
| C26-C10-C9  | 112.01(15) | C28-C27-C26  | 121.25(19) |
| C19-C11-N12 | 110.83(17) | C27-C28-C29  | 119.01(19) |
| C19-C11-C10 | 125.37(18) | C30-C29-C28  | 120.90(18) |
| N12-C11-C10 | 123.40(17) | C30-C29-C132 | 120.10(16) |
| C11-N12-C13 | 108.13(16) | C28-C29-C132 | 118.99(16) |
| N12-C13-C14 | 129.87(19) | C29-C30-C31  | 119.46(19) |
| N12-C13-C18 | 107.78(17) | C26-C31-C30  | 120.78(19) |
| C14-C13-C18 | 122.35(19) | O34-C33-O35  | 123.99(18) |
| C15-C14-C13 | 117.6(2)   | O34-C33-C9   | 124.55(18) |
| C14-C15-C16 | 121.1(2)   | O35-C33-C9   | 111.45(16) |
| C17-C16-C15 | 121.2(2)   | C33-O35-C36  | 118.01(15) |
| C16-C17-C18 | 119.00(19) | O35-C36-C37  | 110.88(16) |
