# Supplementary material for: Highly diastereoselective synthesis of polycyclic amines via redox neutral C–H functionalization
Source: Royal Society of Chemistry journal article supplement (doi:10.1039/c5nj01706h), 2015-01-01
Supplement: c5nj01706h6.pdf [file c5nj01706h6.pdf]

## Experimental

### Highly Diastereoselective Synthesis of Polycyclic Amines *via*-Redox Neutral C-H Functionalization

Chottanahalli. S. Pavan Kumar,<sup>a#</sup> Kachigere. B. Harsha,<sup>a#</sup> Nagarakere. C. Sandhya,<sup>a</sup> Ajjalli. B. Ramesha,<sup>a</sup> Kempegowda Mantelingu,<sup>a\*</sup> and Kanchugarakoppal. S. Rangappa,<sup>a\*</sup>

Single crystals of suitable dimensions were chosen carefully for X-ray diffraction studies. The X-intensity data were collected at a temperature of 293(2) K on a Bruker Proteum2 CCD diffractometer equipped with an X-ray generator operating at 45 kV and 10 mA, using CuK $\alpha$  radiation of wavelength 1.54178 Å. Data were collected for 24 frames per set with different settings of  $\varphi$  (0° and 90°), keeping the scan width of 0.5°, exposure time of 2 s, the sample to detector distance of 45.10 mm and  $2\theta$  value at 46.6°. The complete data sets were processed using *SAINTE PLUS*.<sup>1</sup> The structures were solved by direct methods and refined by full-matrix least squares method on  $F^2$  using *SHELXS* and *SHELXL* programs<sup>2</sup>. The geometrical calculations were carried out using the program *PLATON*.<sup>3</sup> The molecular and packing diagrams were generated using the software *MERCURY*.<sup>4</sup> The details of the crystal structure and data refinement are given in Table 1. The list of bond lengths and bond angles of the non-hydrogen atoms are given in Table 4 and Table 5 respectively. Figures **3c**, **3p** and **4c** represent the ORTEP of the molecule with thermal ellipsoids drawn at 50% probability.

### References

- (1). Bruker, (2012). *SAINTE PLUS*, Bruker AXS Inc., Madison, Wisconsin, USA.
- (2). G. M. Sheldrick, *Acta. Cryst.*, 2008, *A64*, 112.
- (3). A. L. Spek, *Acta. Cryst.*, *A46*, 1990, C34.
- (4). C. F. Macrae, I. J. Bruno, J. A. Chisholm, P. R. Edgington, P. McCabe, E. Pidcock, L. Rodriguez-Monge, R. Taylor, J. van de Streek, and P.A.Wood, *J. Appl. Cryst.*, 2008, **41**, 466.
